# Supplementary material for: LLDT-8 attenuates brain metastasis in non-small cell lung cancer via selective p53 activation
Source: Royal Society of Chemistry journal article supplement (doi:10.1039/d5md00754b), 2025-12-16
Supplement: d5md00754b1.pdf [file d5md00754b1.pdf]

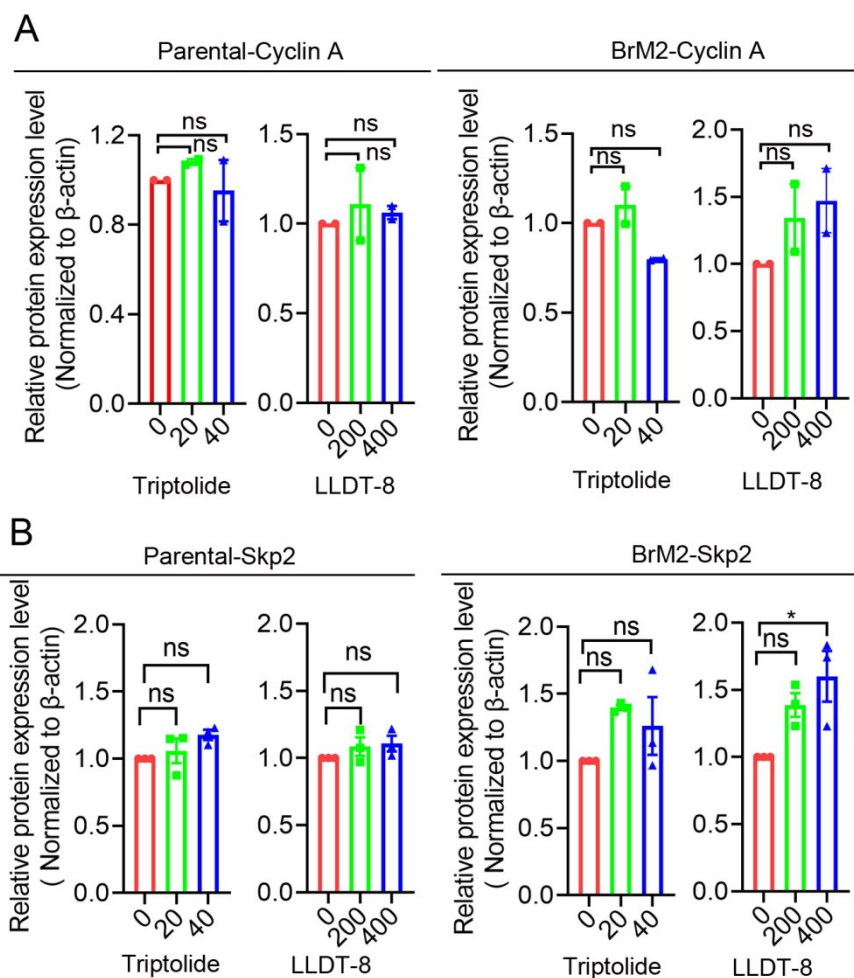

**Supplemental Figure S1:** (A-B) Statistical analysis of the relative protein expression levels in **Figure 3F** and **3H**.
