# Supplementary material for: LLDT-8 attenuates brain metastasis in non-small cell lung cancer via selective p53 activation
Source: Royal Society of Chemistry journal article supplement (doi:10.1039/d5md00754b), 2025-12-16
Supplement: d5md00754b2.xlsx [file d5md00754b2.xlsx]

## Sheet: Vehicle_vs_Triptolide
Supplementary file 1. The differential expressed genes (DEGs) identified by RNA-seq in BrM2 cells treated with Triptolide or LLDT-8(Vehicle_vs_Triptolide) and (Vehicle_vs_LLDT-8).
	baseMean	log2FoldChange	lfcSE	stat	pvalue	padj	logP	Group
ACSBG1	1497.57457628672	-5.75345	0.152137451721688	-37.8175	0	0	Inf	down-regulated
ADAM11	1994.62835079193	-4.31612	0.113745960611466	-37.9452	0	0	Inf	down-regulated
ATF3	3790.14424079652	-4.27738	0.0767170517147425	-55.7553	0	0	Inf	down-regulated
ATP1A3	4703.47388286207	-4.80441	0.092685656935209	-51.8355	0	0	Inf	down-regulated
CDIP1	2190.50014972869	-3.97474	0.0971574367273589	-40.9103	0	0	Inf	down-regulated
CRISPLD2	5189.18014821728	-5.99119	0.0962713417050437	-62.2324	0	0	Inf	down-regulated
CYP1A1	2541.89868632591	-5.95767	0.145359709584628	-40.9857	0	0	Inf	down-regulated
DHRS2	28916.6339981836	-6.56583	0.0704263347144452	-93.2297	0	0	Inf	down-regulated
DNAH3	3217.89487588122	-6.68182	0.13558518773733	-49.2813	0	0	Inf	down-regulated
DPYSL4	5327.54965860563	-2.77275	0.0718888188907702	-38.57	0	0	Inf	down-regulated
EPPK1	2128.78571110937	-6.01846	0.131278676478747	-45.8449	0	0	Inf	down-regulated
H2BC20P	4019.59996554191	-3.056	0.0777865443525509	-39.287	0	0	Inf	down-regulated
H2BC21	2527.2861354948	-4.11408	0.093115591054932	-44.1825	0	0	Inf	down-regulated
HAP1	4863.82568745681	-4.93555	0.0800075895613344	-61.6885	0	0	Inf	down-regulated
NEFL	2340.24084889036	-4.55161	0.110425239591663	-41.219	0	0	Inf	down-regulated
PGF	4055.05255311031	-7.76794	0.165403420233943	-46.9636	0	0	Inf	down-regulated
RRAD	1636.95761140815	-5.93435	0.154069050521357	-38.5174	0	0	Inf	down-regulated
SDC4	8466.6968375254	-2.69563	0.0705086627525224	-38.2312	0	0	Inf	down-regulated
SLC6A8	6403.46008924703	-3.32015	0.0735336848335326	-45.1514	0	0	Inf	down-regulated
TNFRSF10D	11905.8769666093	-2.62582	0.0553927012807373	-47.4038	0	0	Inf	down-regulated
CDKN1A	18578.242534637	-2.09045	0.0569337270063639	-36.7173	3.86884381852664e-295	3.53239769682662e-292	291.451930407072	down-regulated
VASN	2110.59117218578	-3.81686	0.107764728391058	-35.4184	8.88680561121707e-275	7.30258439759078e-272	271.136523415088	down-regulated
LSR	8098.26912063795	-1.94591	0.0549527351130944	-35.4106	1.1733595616874e-274	9.33085803700577e-272	271.030078418032	down-regulated
SLC9A1	7565.69611031261	-2.36721	0.0672238019236193	-35.2138	1.2297854528393e-271	9.47395968231076e-269	268.023468467802	down-regulated
SEPTIN4	1210.49750346486	-4.39686	0.124925331555416	-35.1959	2.30709824600894e-271	1.72347230183674e-268	267.763595691807	down-regulated
NDRG1	11559.8290255498	-2.45727	0.069870763029887	-35.1688	6.00771799816198e-271	4.3559489438438e-268	267.36091721926	down-regulated
CACNA2D2	1217.47521629185	-4.20173	0.120631775658806	-34.8311	8.24169389197212e-266	5.80497822356848e-263	262.236199405107	down-regulated
TUFT1	6071.4448834068	-2.10336	0.0619618053335399	-33.9461	1.39024094672326e-252	8.78774867144148e-250	249.056122372344	down-regulated
H2AC19	1931.5066123512	-3.56023	0.104952132925619	-33.9224	3.11275356320818e-252	1.9183900210052e-249	248.717063093333	down-regulated
SORBS1	1217.39309285394	-3.757	0.111379305813301	-33.7316	1.9901369502599e-249	1.19660624628798e-246	245.92204873447	down-regulated
TNFRSF10A	5944.32558095055	-1.92724	0.0580063822731663	-33.2246	4.75793539496342e-242	2.79268150849138e-239	238.553978590612	down-regulated
H2AC18	1964.26154785306	-3.53491	0.10665093399124	-33.1446	6.76595917162414e-241	3.87894012788089e-238	237.411286923759	down-regulated
CSRNP2	5386.31744501032	-2.2606	0.0687065950920707	-32.9022	2.04653725781347e-237	1.09676601042647e-234	233.959886017111	down-regulated
ZNF425	1276.46423662311	-3.85125	0.118239977240949	-32.5715	1.03981213142426e-232	5.45392524763208e-230	229.263290818863	down-regulated
NRIP3	1087.77211455162	-4.0548	0.125746708682258	-32.2458	4.0333443888146e-228	2.0291837933277e-225	224.692678614961	down-regulated
UNC5B	1073.23804371364	-4.50167	0.140605846226559	-32.0162	6.4882734192554e-225	3.13625326140165e-222	221.503588874053	down-regulated
ARC	1449.13932316591	-7.16826	0.227388423486644	-31.5243	4.03742253830166e-218	1.84315815581875e-215	214.734437397688	down-regulated
SORCS2	1506.73144507569	-3.60526	0.114722343376741	-31.426	8.94376430393163e-217	4.00875777491859e-214	213.396990184756	down-regulated
GRIK5	1044.78092620488	-4.66445	0.148982862630583	-31.3087	3.55646374345154e-215	1.56560614649227e-212	211.805317482328	down-regulated
PMAIP1	2909.20898062547	-2.17815	0.0697360114058942	-31.2342	3.66449921921926e-214	1.58486376758234e-211	210.800008063118	down-regulated
EGR1	1287.10982021681	-5.01493	0.16057553392572	-31.231	4.0447283192893e-214	1.71914900908828e-211	210.76468647874	down-regulated
MXD1	1422.98427528018	-3.27369	0.104884103512699	-31.2124	7.22520095370876e-214	3.01890938831912e-211	210.520149922003	down-regulated
CARNS1	1005.61443153835	-5.736	0.187355529567604	-30.6156	7.58634254201463e-206	3.01642768299588e-203	202.520507082167	down-regulated
SULF2	5989.61562883885	-1.79613	0.0588405581696963	-30.5254	1.19957617509865e-204	4.62061747945812e-202	201.335299983318	down-regulated
CGB7	879.785469418856	-5.47038	0.180197698897174	-30.3577	1.99117051296962e-202	7.5517439208811e-200	199.121952745356	down-regulated
CYSRT1	1193.07784286817	-4.33833	0.143582281079553	-30.215	1.50641166979436e-200	5.54269559459262e-198	197.25627897225	down-regulated
BAIAP2	3502.78718110322	-2.26255	0.0756892314224271	-29.8926	2.45375658349472e-196	8.64142961375883e-194	193.063414403122	down-regulated
RPL3L	935.805228733843	-6.24888	0.209600732074121	-29.8132	2.63228564170928e-195	9.1395923435799e-193	192.039073174822	down-regulated
CCN2	3631.28370926116	-2.01348	0.0678959287449688	-29.6554	2.88604465494723e-193	9.6144287613188e-191	190.017076514148	down-regulated
PLXNA3	6896.76353841587	-1.93042	0.065128727872813	-29.64	4.55767467513328e-193	1.49807728121848e-190	189.824465782137	down-regulated
C4B	1186.79352066225	-4.46751	0.151726716286085	-29.4445	1.48215910967723e-190	4.74521900931989e-188	187.323743738486	down-regulated
ACHE	877.425887416698	-5.51818	0.187715916754148	-29.3964	6.10084522615635e-190	1.92817995532316e-187	186.714852436223	down-regulated
ELAPOR1	1228.03641437282	-3.59436	0.122432469968376	-29.3579	1.89540314816226e-189	5.91461752006279e-187	186.228073334603	down-regulated
GALR2	825.889248302457	-5.91506	0.201675280054446	-29.3296	4.34886489470544e-189	1.34010271730348e-186	185.872861912196	down-regulated
ACER2	1148.36205944274	-3.75708	0.128249461677296	-29.2951	1.19636348799155e-188	3.59667715926436e-186	185.444098543066	down-regulated
ESRRB	856.471003770741	-4.81078	0.164581894542977	-29.2303	7.98548022152816e-188	2.34354831453705e-185	184.630126088647	down-regulated
BAIAP3	1329.01467473238	-3.67304	0.126106308080745	-29.1265	1.65616994295385e-186	4.80328252161157e-184	183.318461868083	down-regulated
SLC17A7	925.263726326044	-6.22335	0.213767294571288	-29.1127	2.47845881158446e-186	7.10453100269537e-184	183.148464586233	down-regulated
FAM131B	1015.16236446319	-4.58472	0.157669057660513	-29.0781	6.78867929219547e-186	1.92361519438164e-183	182.71588180115	down-regulated
LRRC32	818.479129409361	-5.75611	0.199276860743313	-28.885	1.84361293632947e-183	5.16463023936297e-181	180.286960766255	down-regulated
PPP1R15A	5333.24959636679	-1.72973	0.0599610253009207	-28.8476	5.43430075247609e-183	1.50524024887686e-180	179.822394177522	down-regulated
SYT11	1373.9467034598	-3.58821	0.12460439346571	-28.7968	2.35086811509685e-182	6.43928897481861e-180	179.191162084715	down-regulated
ENSG00000280287	1022.09044525921	-3.92775	0.136537624788283	-28.7668	5.58533730071744e-182	1.49662755584007e-179	178.824886262829	down-regulated
CHRM4	909.330469800739	-6.45322	0.224790888927665	-28.7077	3.06155697631615e-181	8.02909601916445e-179	178.095333348369	down-regulated
NECTIN4	885.707684184449	-4.21029	0.146678076639707	-28.7043	3.36962696361957e-181	8.74400462180522e-179	178.058289621504	down-regulated
FAS	3116.72052608272	-2.55698	0.0892365058055906	-28.654	1.43015858718329e-180	3.63466695786005e-178	177.439535377099	down-regulated
SLC30A3	1057.94126062237	-4.00395	0.140334580225862	-28.5314	4.77616021311185e-179	1.16576140171914e-176	175.933390328239	down-regulated
H2BC11	1123.82653630745	-3.31301	0.116888232564596	-28.3434	1.00875323018867e-176	2.41434802238942e-174	173.617200127234	down-regulated
FDXR	10546.6528794469	-1.98388	0.0700035757797169	-28.3397	1.11987965657611e-176	2.65454550903022e-174	173.576009824796	down-regulated
TP53INP1	2194.60655526054	-3.20608	0.113482338750383	-28.2518	1.35355644449963e-175	3.14791259149102e-173	172.501977335258	down-regulated
DDN	803.09325643897	-4.56446	0.162046668512707	-28.1676	1.4593538145875e-174	3.36224207824402e-172	171.47337102098	down-regulated
RASA4B	1491.71199834761	-3.32628	0.119106195084303	-27.927	1.25304850620591e-171	2.86019923842482e-169	168.543603713327	down-regulated
TG	900.108026962072	-6.47633	0.232487283660865	-27.8567	8.93637878754024e-171	2.02109733826094e-168	167.694412769883	down-regulated
MAP1LC3B	9452.94380987964	-1.74423	0.0626454154585707	-27.8429	1.31262351451702e-170	2.94170862544306e-168	167.531400346098	down-regulated
H1-0	25370.7428263646	-1.32816	0.0479297222035989	-27.7107	5.1931451668376e-169	1.15334607795388e-166	165.938040356891	down-regulated
TP53INP2	2224.20401934745	-2.55424	0.0923095925678858	-27.6704	1.58602542676911e-168	3.49095525184929e-166	165.457055718072	down-regulated
HELZ2	4546.22797165515	-2.38229	0.0865519612714551	-27.5244	8.96725198723476e-167	1.92226692164618e-164	163.716186307329	down-regulated
PGRMC1	19041.8826121424	-1.28514	0.0470717301899454	-27.3018	4.03963328544905e-164	8.51154185922138e-162	161.06999176068	down-regulated
PLIN4	1344.99883300065	-3.93825	0.146426805779737	-26.8957	2.46739202338501e-159	4.98574984922026e-157	156.302269515208	down-regulated
CEACAM22P	894.483524286059	-6.8715	0.255779940377678	-26.8649	5.65105235971299e-159	1.12346566751326e-156	155.94944019484	down-regulated
PARP16	3385.67223850904	-2.01911	0.0753207771401487	-26.8068	2.69282950942049e-158	5.31069064529872e-156	155.274848996068	down-regulated
OASL	727.288965531799	-5.20466	0.194586892884525	-26.7472	1.33051241469127e-157	2.6031580989658e-155	154.584499454855	down-regulated
WHRN	1469.87468980857	-2.98526	0.112315094279394	-26.5793	1.17765051634481e-155	2.26808129132282e-153	152.644341383756	down-regulated
ZNF654	1835.58569221838	-2.48194	0.0934178182628744	-26.5681	1.58616787760037e-155	3.03117910996933e-153	152.518388400758	down-regulated
SUSD6	3032.24608615766	-2.01016	0.0757005714828762	-26.5541	2.30027865889545e-155	4.36203611531467e-153	152.360310743018	down-regulated
CABYR	3380.93236584764	-2.50394	0.0944352335658598	-26.5149	6.51886461848909e-155	1.22674084408392e-152	151.91124717474	down-regulated
C4A	1166.20315237909	-4.5788	0.173156959519767	-26.443	4.38658208944169e-154	8.13067832097116e-152	151.089873220855	down-regulated
KCTD5	5502.05053734265	-1.65171	0.0625402810581039	-26.4104	1.04053679839779e-153	1.91427710105241e-151	150.71799519574	down-regulated
CILP	831.798106444253	-6.8339	0.25923	-26.3623	3.71286460350641e-153	6.77996579301037e-151	150.168772497275	down-regulated
TNFSF9	1788.78311135108	-2.92827	0.111104023003182	-26.3561	4.37078997061856e-153	7.9226995849771e-151	150.101126811454	down-regulated
SERTAD1	4861.6366410604	-2.22167	0.0845071242213065	-26.2897	2.51416505224985e-152	4.52402896847178e-150	149.344474622843	down-regulated
SLC30A1	8207.85189886188	-1.6954	0.0645976743250603	-26.2456	8.033441169846e-152	1.43507530231191e-149	148.843125309717	down-regulated
RASD1	685.847904258869	-5.67281	0.218601869614854	-25.9504	1.79920894638129e-148	3.10168524099242e-146	145.508402276489	down-regulated
PIK3R3	1453.70847707028	-2.61709	0.101003385316116	-25.9109	5.02172337726e-148	8.59691143723705e-146	145.065657547208	down-regulated
APOLD1	887.592961537645	-3.894	0.150321772975089	-25.9045	5.93309934981195e-148	1.00870872532113e-145	144.996234222512	down-regulated
ICAM1	1149.94555649352	-3.53866	0.136822687913601	-25.8631	1.73191580065529e-147	2.92432796696946e-145	144.533973922324	down-regulated
SESN1	2203.78677322736	-2.59275	0.100745521300319	-25.7357	4.66458365748879e-146	7.71753800834992e-144	143.11252122297	down-regulated
MED29	16313.3338922873	-1.19701	0.0465574844872164	-25.7104	8.95039534744883e-146	1.47096764070206e-143	142.832396881058	down-regulated
CTSV	1761.65190159713	-2.43902	0.0949633045612503	-25.6838	1.77330855696049e-145	2.89507301630397e-143	142.538340478507	down-regulated
SELPLG	590.87176211273	-4.62163	0.18011986723599	-25.6587	3.38488813442756e-145	5.48975409802028e-143	142.260447108421	down-regulated
CEBPA	2694.02982032255	-1.99814	0.0779801708490233	-25.6237	8.31456728006891e-145	1.33097865317051e-142	141.875828909878	down-regulated
CDKN2D	1292.08492861171	-2.55695	0.10024986284069	-25.5058	1.69927074416493e-143	2.6852834862278e-141	140.571009858938	down-regulated
HES2	775.490731615844	-3.87658	0.152943949725023	-25.3464	9.84303397964225e-142	1.54554441825567e-139	138.810918508992	down-regulated
CSNK1G1	6427.96426721822	-1.48259	0.0589012992888231	-25.1707	8.37942926909929e-140	1.26729871375359e-137	136.897121005918	down-regulated
IGF2	711.528692440687	-5.03024	0.200483798034734	-25.0905	6.31468118485496e-139	9.49204393713686e-137	136.022640260171	down-regulated
SYT7	1046.84334769571	-2.77781	0.110799997282737	-25.0705	1.04372025268063e-138	1.54998744994475e-136	135.809671818244	down-regulated
HPX	620.374588056021	-4.22565	0.16906111825075	-24.9948	6.957749724789e-138	1.02096694175892e-135	134.990988319856	down-regulated
ANGPTL4	1576.24344686685	-2.27852	0.091187966367423	-24.9871	8.44666022380951e-138	1.23211282743995e-135	134.909349520994	down-regulated
AP3B2	572.831062687897	-4.35388	0.174308333697975	-24.9781	1.05859694127504e-137	1.53509010566543e-135	134.813866127519	down-regulated
GRAP	688.739618113723	-6.48296	0.260727376725684	-24.8649	1.78458759961071e-136	2.54298575176897e-134	133.594656073149	down-regulated
C1S	9384.95710347207	-1.60963	0.0647443078696415	-24.8614	1.94817120485692e-136	2.76013313460533e-134	133.559069969301	down-regulated
EHD1	17343.5053988713	-1.42419	0.0576526624312927	-24.7029	9.95490562405352e-135	1.37869850249532e-132	131.860530696129	down-regulated
ENSG00000188897	654.648021359357	-4.44859	0.180300234960032	-24.6732	2.0725066701474e-134	2.85427008002646e-132	131.544504934965	down-regulated
ULBP2	1195.61561485618	-2.82359	0.114699522182857	-24.6173	8.25303159186865e-134	1.12405378344059e-131	130.949212908257	down-regulated
MAFF	1835.6370026467	-3.10867	0.126473665727955	-24.5796	2.08946163360242e-133	2.81472175910201e-131	130.550564529572	down-regulated
HAPLN3	2414.11533754139	-2.83924	0.115631736296475	-24.5542	3.90255743310139e-133	5.22857857830519e-131	130.281616360751	down-regulated
VDR	1599.52673226091	-2.75084	0.112784556547515	-24.3902	2.17228408657532e-131	2.84846528203483e-129	128.545389069489	down-regulated
MDM2	10525.2237683578	-1.73499	0.0714301687316889	-24.2893	2.5433457662464e-130	3.28264711149247e-128	127.48377580194	down-regulated
H3C10	1407.78760291282	-2.82761	0.116614247144052	-24.2475	7.01968846758895e-130	8.96628808823849e-128	127.047387311296	down-regulated
APAF1	5014.68052275102	-1.97557	0.0815821637616749	-24.2157	1.51986101850098e-129	1.93132030041681e-127	126.714145694544	down-regulated
GIPC3	589.743407036402	-6.16879	0.25556980288435	-24.1374	1.01299482441271e-128	1.27409940874602e-126	125.894796685827	down-regulated
COX6B2	593.176194028583	-4.12079	0.170726294174171	-24.1368	1.02689037434848e-128	1.28502038113902e-126	125.891089984126	down-regulated
NES	1405.89174894403	-2.20079	0.0912437883809614	-24.1199	1.54678310197123e-128	1.90656485148973e-126	125.719748417684	down-regulated
H2AC11	598.982193258091	-3.91561	0.162527085893674	-24.0921	3.02780741281332e-128	3.69512417528089e-126	125.432370962483	down-regulated
PLA2G4C	761.213938837739	-3.8612	0.161498977699885	-23.9085	2.49648997531449e-126	2.98754712968218e-124	123.524685234831	down-regulated
DNAI1	590.869787736074	-6.43001	0.269227361160461	-23.8832	4.58096870045078e-126	5.42932886555349e-124	123.265253851443	down-regulated
NXF1	12711.8612058557	-1.33089	0.0557679986158695	-23.8647	7.12014330427897e-126	8.36472554539987e-124	123.077548304083	down-regulated
TMEM229B	696.514189234222	-4.5161	0.190049226566565	-23.7628	8.10783809961129e-125	9.38377581369096e-123	122.02762237643	down-regulated
NTN1	575.321920673458	-5.96228	0.251682746017024	-23.6897	4.60792655630232e-124	5.28347002167278e-122	121.277080752414	down-regulated
INPP5D	647.14187306376	-5.31495	0.224587580583809	-23.6654	8.20151572210825e-124	9.36035951765799e-122	121.028707470329	down-regulated
NARF	6436.60801327027	-1.48214	0.0627532303036181	-23.6185	2.48698219720116e-123	2.79950160389968e-121	120.552919279351	down-regulated
H2BC5	2253.05944928734	-2.0211	0.0856077307777002	-23.6089	3.12408545191124e-123	3.50067975275072e-121	120.455847617305	down-regulated
HBEGF	1614.24000385125	-2.27119	0.0964111171751523	-23.5574	1.05487725535288e-122	1.16613605824929e-120	119.933250775564	down-regulated
HSPA6	652.802536037281	-4.93069	0.209378189026155	-23.5492	1.27847317807998e-122	1.40700539223338e-120	119.851704238164	down-regulated
ARHGAP4	706.231470593217	-3.51834	0.14998641140541	-23.4577	1.10313372180327e-121	1.20329435884487e-119	118.919628119307	down-regulated
FSTL3	26895.3185691839	-1.43367	0.0611591422652755	-23.4416	1.61174362631415e-121	1.74266245069721e-119	118.758786726485	down-regulated
RETSAT	12231.3875614777	-1.32598	0.0565956767633019	-23.429	2.16323139682135e-121	2.31860784323652e-119	118.634772699366	down-regulated
SYT3	552.620836102024	-4.22698	0.180731008658613	-23.3882	5.630644965319e-121	6.00894630671186e-119	118.221201676633	down-regulated
ENSG00000260261	1194.29964814494	-2.59763	0.111521546426229	-23.2927	5.26236450849421e-120	5.56771716151929e-118	117.254322834876	down-regulated
PPM1D	3147.83875298374	-2.14478	0.0925309981074034	-23.179	7.41193889048096e-119	7.80850929607421e-117	116.107431868336	down-regulated
FLNC	1267.85874620681	-3.44581	0.149325356405326	-23.0758	8.09719399764723e-118	8.4941287842553e-116	115.070881158713	down-regulated
ACBD7	701.852352817688	-3.53376	0.153726328054684	-22.9874	6.23822765813624e-117	6.38111154474583e-115	114.195103663645	down-regulated
GOLGA7B	933.026567080939	-3.5751	0.155551718876407	-22.9833	6.84067122266766e-117	6.96843913145468e-115	114.15686448912	down-regulated
SMPD1	2778.59659127632	-1.67526	0.0734158446504371	-22.8188	2.98460114449654e-115	2.99091005748491e-113	112.524196646857	down-regulated
FAM53C	5958.83911182322	-1.34629	0.0590031281112463	-22.8173	3.08627296742591e-115	3.08027535194265e-113	112.511410459316	down-regulated
CATSPERG	496.875705359144	-3.96667	0.174399808971086	-22.7447	1.61970441278341e-114	1.60357241702557e-112	111.794911422636	down-regulated
MICALL2	5432.36314623271	-1.3221	0.0581641584573197	-22.7306	2.23417570812599e-114	2.20307598226888e-112	111.656970524133	down-regulated
NATD1	1424.29760544011	-3.00705	0.132557674515834	-22.6848	6.32330451088883e-114	6.18579773025522e-112	111.20860428512	down-regulated
ANKRD24	449.198385952375	-4.58793	0.202568711865878	-22.6487	1.43556883688834e-113	1.3988001172716e-111	110.854244339953	down-regulated
PFKFB4	2109.06228688344	-1.857	0.0820520039498916	-22.632	2.10037816817812e-113	2.03852451188689e-111	110.690684062081	down-regulated
FOSL1	3748.74502996283	-2.01332	0.0890416834140335	-22.611	3.37572863503851e-113	3.25072118402224e-111	110.488020278561	down-regulated
VWCE	692.260337886275	-4.47545	0.198332328625286	-22.5654	9.47431678883039e-113	9.05274641388553e-111	110.043219644944	down-regulated
CRABP2	3353.09673475643	-5.13223	0.22801765224924	-22.508	3.46308637846437e-112	3.29621642478392e-110	109.481984280894	down-regulated
ANO9	1467.78778792916	-2.71235	0.120556001339599	-22.4987	4.27672038079471e-112	4.05498887797504e-110	109.392010332634	down-regulated
NRXN2	431.949843777962	-4.79555	0.21369255617492	-22.4414	1.55447168712978e-111	1.46262732943219e-109	108.834866315972	down-regulated
EIF4A3	17667.3882854418	-1.05334	0.0469483503915727	-22.4361	1.75108512045685e-111	1.64135933039932e-109	108.784796331728	down-regulated
SEMA4A	523.052086269276	-5.75167	0.256451594160199	-22.4279	2.10436439557757e-111	1.96502996514311e-109	108.706630822593	down-regulated
FBXO32	886.647454483975	-2.7281	0.121677360058479	-22.4208	2.46866761151009e-111	2.29651297958289e-109	108.638931095665	down-regulated
INAFM2	977.618065015565	-2.47851	0.110572462541425	-22.4152	2.79472385598271e-111	2.59005761269495e-109	108.586690575457	down-regulated
SLFN5	1359.61844332132	-2.50571	0.111904623542467	-22.3914	4.76969209851109e-111	4.40383706413841e-109	108.356168757696	down-regulated
CHPF2	8549.72487098768	-1.28726	0.0576702698508742	-22.321	2.31236247694683e-110	2.11127258450715e-108	107.675455691702	down-regulated
ALDOC	991.491917794069	-2.72664	0.122363226657793	-22.2832	5.37733016578054e-110	4.89158462165394e-108	107.310550429024	down-regulated
RHBDD2	10494.2643234002	-1.56031	0.0702243147038675	-22.2189	2.25647321128674e-109	2.0301670658628e-107	106.692468221793	down-regulated
CLDN4	1679.68845452186	-2.22004	0.100172851768295	-22.1621	7.97167340214522e-109	7.0689817521469e-107	106.150643139424	down-regulated
PLEKHO2	1724.88898759651	-2.02693	0.0915203255119533	-22.1474	1.10624292391318e-108	9.77458801444724e-107	106.009901538466	down-regulated
SLC7A8	447.582935675317	-4.9459	0.224024952297813	-22.0774	5.2069491036169e-108	4.56803235951473e-106	105.34027082825	down-regulated
ZNF707	2429.82663215707	-2.23842	0.101742616303181	-22.0008	2.82715933133513e-107	2.46272550657504e-105	104.608583991581	down-regulated
NKPD1	470.166474051232	-4.50141	0.205808079824639	-21.8719	4.81462364159853e-106	4.13554362413544e-104	103.383467393622	down-regulated
GCH1	1710.52909537061	-2.55598	0.116926604680854	-21.8597	6.28319886086867e-106	5.37824369160189e-104	103.269359523511	down-regulated
ITGAM	896.828209348134	-3.08574	0.14116406921241	-21.8593	6.34583088110388e-106	5.41305961525857e-104	103.266557189899	down-regulated
TSPYL2	3068.68889781225	-1.83387	0.0839408208341616	-21.8472	8.26832616539897e-106	7.02864746997984e-104	103.153128238684	down-regulated
OAT	10281.9806580074	-1.32907	0.0608966261478851	-21.8251	1.34079547989917e-105	1.12809864063052e-103	102.947652924104	down-regulated
MCAM	2763.27790972704	-1.58651	0.0730126378384753	-21.7293	1.08455816147523e-104	9.09405707370321e-103	102.041242324519	down-regulated
KDM5B	8358.75483959484	-1.41393	0.0651276740524293	-21.7101	1.6471070101932e-104	1.37177304105685e-102	101.862717736421	down-regulated
CFAP43	524.864278660738	-4.41249	0.203796402704212	-21.6515	5.88749568732275e-104	4.83795145612935e-102	101.315338493651	down-regulated
CACNA1G	1719.43809458228	-2.12704	0.0987608462354595	-21.5373	6.96571650461134e-103	5.64864616025259e-101	100.248055629275	down-regulated
ENSG00000248710	499.024836873565	-5.38885	0.250643767502839	-21.5	1.55620189350676e-102	1.25781931405668e-100	99.9003817408813	down-regulated
CHST11	4607.27966737207	-1.41176	0.0656701970923555	-21.4977	1.63724420376318e-102	1.31899817356764e-100	99.8797558058259	down-regulated
FAM43A	698.685449844256	-3.72986	0.174087441049819	-21.4252	7.78189652302442e-102	6.12905153628108e-100	99.2126067268567	down-regulated
LGMN	7736.11437154442	-1.33052	0.0621228788546854	-21.4176	9.16452720555624e-102	7.19502944813288e-100	99.1429674242242	down-regulated
ALPP	883.581781606557	-8.35848	0.390438451441768	-21.4079	1.12687127210468e-101	8.81893034918238e-100	99.0545840873873	down-regulated
RRM2B	5488.81388098413	-1.40748	0.0658375302359861	-21.3781	2.13566331399792e-101	1.66608146000476e-99	98.778303768376	down-regulated
TUBA4A	33320.915101491	-1.07446	0.0503038644940978	-21.3594	3.18742716454758e-101	2.46321173857138e-99	98.6084982544456	down-regulated
PADI2	1476.51887016048	-1.8722	0.0879816890106955	-21.2795	1.75915489882153e-100	1.3509871204283e-98	97.8693487912841	down-regulated
PHLDA2	1852.38428735717	-2.33698	0.110478423747121	-21.1533	2.57485148750888e-99	1.9591123108046e-97	96.7079406663204	down-regulated
SYTL2	1202.7715395541	-2.33357	0.110345016278836	-21.1479	2.88328532114364e-99	2.18703845344101e-97	96.6601435809448	down-regulated
GSTM3	1397.1	-2.20709	0.104439617922412	-21.1327	3.9798391587615e-99	3.00953972214075e-97	96.5214999201602	down-regulated
TNXB	412.367281453533	-5.16313	0.244713921063705	-21.0986	8.18754927300411e-99	6.1724606935198e-97	96.2095416669921	down-regulated
DPYSL5	1602.61712915629	-1.82611	0.0866809298611637	-21.0671	1.59500027948468e-98	1.19151354211686e-96	95.9239010173266	down-regulated
CHD5	485.754172664757	-3.50084	0.1666425148491	-21.0081	5.53243388261848e-98	4.12040966991875e-96	95.3850596022824	down-regulated
DEDD2	7351.49487018382	-1.39848	0.0666775951415672	-20.9737	1.14008513115466e-97	8.46547549795921e-96	95.072348642949	down-regulated
B2M	14046.6917759514	-1.07697	0.0514051895885862	-20.9507	1.85032627545767e-97	1.36979709737485e-95	94.8633437584031	down-regulated
NR1D1	2261.99862078734	-2.37018	0.113362156284595	-20.908	4.52441426758942e-97	3.33939702169504e-95	94.4763319445032	down-regulated
ABTB2	5678.86570620294	-1.64374	0.0786228280774682	-20.9066	4.65905366422632e-97	3.42850719195544e-95	94.4648949351812	down-regulated
PI4K2A	6084.78614360221	-1.2245	0.0588931090838979	-20.7919	5.12691500897124e-96	3.76156871432021e-94	93.4246310003136	down-regulated
ZMAT3	1947.19736178024	-1.78276	0.0857659562936938	-20.7863	5.7601810767677e-96	4.2136493740201e-94	93.375341605715	down-regulated
TNFRSF10B	24842.8730074206	-1.01037	0.0487755278574767	-20.7148	2.54872711075557e-95	1.8534283402462e-93	92.7320242005906	down-regulated
KCP	378.234726944027	-4.30437	0.207972568678299	-20.6968	3.698471880305e-95	2.67374571241287e-93	92.5728798988494	down-regulated
ZNF296	1170.32666261141	-2.51035	0.121314715481231	-20.6928	4.01832463766586e-95	2.89648359554792e-93	92.5381289268173	down-regulated
FAM214A	2280.93611350472	-2.06931	0.100059056540916	-20.6809	5.14519174575439e-95	3.69793781097193e-93	92.4320403967406	down-regulated
RIOK3	3560.32421509269	-1.31226	0.0635806622638724	-20.6393	1.21717573655521e-94	8.72262100510437e-93	92.0593529970608	down-regulated
L1CAM	4443.5656372636	-1.17752	0.0570560937608621	-20.6379	1.25335495246278e-94	8.95585689510508e-93	92.0478928545931	down-regulated
POU2F2	413.697873429598	-4.66521	0.226210828534324	-20.6233	1.69676366001789e-94	1.20891958805668e-92	91.917602585512	down-regulated
SPTY2D1	4878.87679696625	-1.31147	0.0636400464715951	-20.6076	2.34615221699559e-94	1.65723050009671e-92	91.7806170824328	down-regulated
H2BC19P	1208.16776916172	-2.87518	0.139707678016023	-20.58	4.1498770468671e-94	2.92293625598193e-92	91.5341806557261	down-regulated
SAMD4A	3221.49599967025	-1.65888	0.0808126274450242	-20.5274	1.22500870422455e-93	8.55493330780272e-92	91.0677833717647	down-regulated
BTG2	2406.35083512609	-2.09298	0.10213632964274	-20.492	2.5382170440431e-93	1.76757419688561e-91	90.7526223469106	down-regulated
FAM117A	588.505201948716	-3.10326	0.151453316595131	-20.4899	2.65068522615605e-93	1.84069555479434e-91	90.735018036486	down-regulated
CHGA	416.625773771392	-4.86691	0.23798046315853	-20.4509	5.8996071098893e-93	4.0853122042975e-91	90.3887747485752	down-regulated
SLC16A3	10637.683619968	-1.28047	0.0626957160876818	-20.4236	1.03219006234105e-92	7.12760487866431e-91	90.1470563835744	down-regulated
IER5	8062.90680927665	-1.18346	0.0579489180489448	-20.4225	1.05425792715863e-92	7.25965542466889e-91	90.1390839923462	down-regulated
ECM1	1048.49901492373	-2.29355	0.112374002259424	-20.41	1.3626789695698e-92	9.35731530858905e-91	90.0288487360813	down-regulated
RTL5	1437.43129980458	-1.95387	0.0957945590073718	-20.3964	1.79862050083509e-92	1.23165534962741e-90	89.9095108024762	down-regulated
ADRB2	493.057481316747	-4.89557	0.240175629471581	-20.3833	2.35357559450913e-92	1.59396553724833e-90	89.7975210726166	down-regulated
KLLN	388.389430266532	-4.0018	0.196841346612719	-20.3301	6.96976073579198e-92	4.69449567373617e-90	89.328411056833	down-regulated
GADD45A	2650.34123602168	-1.6626	0.0818882951433664	-20.3033	1.20236936717965e-91	8.05456783687849e-90	89.0939577564358	down-regulated
FSCN1	29100.2906772507	-1.10603	0.0545070050749351	-20.2915	1.52886106759551e-91	1.02139520429172e-89	88.9908061855979	down-regulated
RYR1	652.767983241242	-2.72314	0.134244059795028	-20.285	1.74357475495587e-91	1.16169202322087e-89	88.9349089927235	down-regulated
ZNF843	387.048211994328	-5.0807	0.251476193706821	-20.2035	9.12061657742019e-91	6.04412472759576e-89	88.218666582065	down-regulated
SLC10A3	4816.91519078751	-1.44121	0.0715026785298294	-20.156	2.3838263061092e-90	1.56709562928544e-88	87.8049045006573	down-regulated
E2F7	2422.56076327682	-1.45134	0.0720264114631084	-20.1501	2.68467825154593e-90	1.76017787917846e-88	87.7544434412528	down-regulated
COL1A1	1540.06361388214	-2.23279	0.111469852498362	-20.0305	2.98766369770101e-89	1.93312035369358e-87	86.7137411064899	down-regulated
PLEKHA4	370.892938243617	-5.04297	0.25184305123183	-20.0242	3.38632305001259e-89	2.18533078086153e-87	86.6604828170779	down-regulated
BPGM	2620.6363922102	-1.64314	0.0821652921725694	-19.9979	5.7406960309812e-89	3.68540725405595e-87	86.433514513662	down-regulated
CYP2C9	423.890418376304	-6.55188	0.328704444422708	-19.9324	2.1297362139278e-88	1.35664747146636e-86	85.8675329902821	down-regulated
MX1	571.022408011592	-3.44201	0.172683027326691	-19.9325	2.12491072973049e-88	1.35664747146636e-86	85.8675329902821	down-regulated
SBSN	349.151788055798	-5.10296	0.256412600961119	-19.9014	3.96026811434404e-88	2.50329562961049e-86	85.6014878588508	down-regulated
ZCCHC24	1499.88451558869	-1.74837	0.0879833494907915	-19.8716	7.16975748824541e-88	4.50889953061801e-86	85.3459294417359	down-regulated
SP6	917.362082202666	-3.0494	0.153518959334826	-19.8633	8.45419690046732e-88	5.30312625929568e-86	85.2754680328734	down-regulated
PLK3	1662.31244897379	-1.65175	0.0831603532349322	-19.8622	8.64814479972893e-88	5.41101689347507e-86	85.2667211101754	down-regulated
NEU3	2805.24622837395	-1.48826	0.0750855168482555	-19.8209	1.9668157787954e-87	1.21214856447161e-85	84.9164441485063	down-regulated
EPHA2	30042.2765605663	-1.05003	0.0530141264536955	-19.8066	2.61306044563735e-87	1.60641311984668e-85	84.7941427575644	down-regulated
RSRP1	5652.11711884467	-1.40263	0.0708350199327474	-19.8014	2.89559503638487e-87	1.77567683674029e-85	84.7506360705343	down-regulated
CFAP20	4981.96251174806	-1.28345	0.0649758921365163	-19.7527	7.60492527552551e-87	4.6405103438677e-85	84.3334342549327	down-regulated
ADGRF3	362.605927923016	-4.27054	0.216972107804785	-19.6824	3.04964561470321e-86	1.84717109812441e-84	83.7334928752529	down-regulated
PDCL3P4	864.372254194546	-2.65347	0.135224551495032	-19.6227	9.89836763315926e-86	5.93709389033193e-84	83.2264260830041	down-regulated
TIGAR	4862.08299211104	-1.26233	0.0643935849899683	-19.6033	1.44879490730242e-85	8.66885729485905e-84	83.0620381462659	down-regulated
SERINC1	9753.12649815012	-1.0414	0.0531492292713479	-19.5938	1.74541996991242e-85	1.03932592024833e-83	82.9832	down-regulated
COQ8A	2842.88837417575	-1.34548	0.0686949600355967	-19.5863	2.02353164232347e-85	1.20202655533875e-83	82.9200859377329	down-regulated
HSPA4L	4542.00929988755	-1.30182	0.0665088960065112	-19.5736	2.59610073399678e-85	1.53843930996367e-83	82.8129196316023	down-regulated
STS	2362.57082358262	-1.72457	0.0881937732028304	-19.5544	3.78618413611294e-85	2.23260498263857e-83	82.6511881103527	down-regulated
VGF	733.488763709795	-2.99863	0.153594817238047	-19.523	6.99984197791206e-85	4.08910200093574e-83	82.3883720560167	down-regulated
CTR9	6980.01708362541	-1.17219	0.0600681129926014	-19.5144	8.27928967696791e-85	4.82508390346603e-83	82.3164951303004	down-regulated
FAM222A	1005.44850905309	-2.11039	0.108245585316331	-19.4963	1.17954609600517e-84	6.80987596222937e-83	82.1668607984264	down-regulated
TESK2	501.442603891759	-4.45901	0.228858484809053	-19.4837	1.50902938290535e-84	8.65130054590293e-83	82.0629186003441	down-regulated
PKNOX1	1816.79662611068	-1.62519	0.0835774618034201	-19.4453	3.19591250459788e-84	1.82797297130735e-82	81.7380302301005	down-regulated
TMX4	6784.84009078686	-1.12775	0.0580265979211253	-19.4351	3.89730676937993e-84	2.21885465308901e-82	81.6538711454601	down-regulated
ELFN1	340.847017050802	-5.62912	0.2908562518024	-19.3536	1.90025058248928e-83	1.0695200310394e-81	80.9708110771154	down-regulated
ITGA7	1071.03993188246	-2.30561	0.119265279813797	-19.3318	2.90207854903602e-83	1.62226848958812e-81	80.7898772673277	down-regulated
FGFR3	1949.2794154334	-1.7692	0.0916027831285563	-19.3139	4.10607939780986e-83	2.27979885844164e-81	80.6421034681409	down-regulated
ATP6AP2	13516.1237189612	-1.15859	0.0601596288682755	-19.2586	1.19508035101562e-82	6.60563246933569e-81	80.1800855936752	down-regulated
KLHL30	363.672359794705	-4.86096	0.252679600426609	-19.2376	1.79238302545851e-82	9.86290766598284e-81	80.0059950326111	down-regulated
SNAI1	789.528081533316	-2.69119	0.140057411060283	-19.2149	2.77831668305143e-82	1.52541342696178e-80	79.8166124351928	down-regulated
COL26A1	508.989752242335	-3.62839	0.18913717770915	-19.1839	5.04339634707312e-82	2.76288459440103e-80	79.5586372551709	down-regulated
FEZ1	328.274401912743	-4.19567	0.219123670709682	-19.1475	1.01530852619864e-81	5.53747473182499e-80	79.2566882425032	down-regulated
SPRED3	679.820034036321	-2.42946	0.126894015771936	-19.1456	1.05361783739971e-81	5.73372779858229e-80	79.241562928477	down-regulated
TCN2	1905.83662862108	-1.65712	0.0865863531732793	-19.1384	1.21030540958717e-81	6.57190505663941e-80	79.1823087193811	down-regulated
PNP	14326.9287561136	-1.24274	0.0650043424935679	-19.1178	1.79664098461013e-81	9.73424034123271e-80	79.0116979351027	down-regulated
TSPEAR	454.091542685701	-4.37622	0.228975068080709	-19.1122	1.99892008712372e-81	1.07827960585938e-79	78.9672686087815	down-regulated
HDAC5	1690.70686784201	-2.1311	0.111507625416781	-19.1117	2.01838549923162e-81	1.08640260539428e-79	78.9640092015439	down-regulated
DISP3	315.409309514881	-5.01769	0.262574185602239	-19.1096	2.1008839298744e-81	1.12834402264191e-79	78.9475584674128	down-regulated
FBP2	416.710117431711	-6.91956	0.362893138245969	-19.0678	4.67997099673461e-81	2.50805750025004e-79	78.6006625110012	down-regulated
IRF1	3380.49538403162	-1.31198	0.0688386658690198	-19.0588	5.5543571857116e-81	2.97019551718357e-79	78.5272149617134	down-regulated
PTAFR	344.21775730256	-5.01914	0.264625851547872	-18.9669	3.20137068534233e-80	1.69720839000127e-78	77.7702648300033	down-regulated
COL4A1	8375.35746005325	-1.02799	0.0542028688880061	-18.9657	3.27901094652359e-80	1.73463900973604e-78	77.7607908911276	down-regulated
PPL	4531.36827696435	-1.39825	0.0737586762357756	-18.9571	3.85832117996565e-80	2.03673091495746e-78	77.6910663445239	down-regulated
KDM4B	3756.62951172581	-1.61656	0.0852847499280434	-18.9549	4.02309066258827e-80	2.11917160286594e-78	77.673833874266	down-regulated
SMTN	4846.82666317213	-1.13468	0.0599050742401611	-18.9413	5.20859364504055e-80	2.73196277739446e-78	77.5635252221509	down-regulated
ACTA2	3447.88115678599	-1.50867	0.0796969791434579	-18.93	6.45236277870472e-80	3.36999252586078e-78	77.4723710623278	down-regulated
RALGDS	4090.8278153797	-1.53289	0.0809795447680352	-18.9293	6.54202885174221e-80	3.40960032247672e-78	77.4672965265547	down-regulated
TMPRSS9	508.614986414295	-3.88236	0.205670618990728	-18.8766	1.77614871612934e-79	9.19865927521441e-78	77.0362754674161	down-regulated
ZCCHC12	341.276927753343	-5.5491	0.295403549396311	-18.7848	1.00546596307284e-78	5.1746862049419e-77	76.2861159808651	down-regulated
CLP1	3347.00012071153	-1.39768	0.0746132150450292	-18.7323	2.70119019472549e-78	1.38440209314704e-76	75.8587377527458	down-regulated
H2BC6	490.530891196537	-4.03083	0.215227803326798	-18.7282	2.91492897833083e-78	1.49084707829485e-76	75.8265669014556	down-regulated
TMEM200B	383.575604361119	-5.79324	0.309788680998161	-18.7006	4.89346902808615e-78	2.48729481402845e-76	75.6042727356318	down-regulated
GPX3	2135.66721136974	-1.67215	0.0894184593575681	-18.7003	4.92099749198483e-78	2.49614053852696e-76	75.6027309665102	down-regulated
SRGAP3	1010.88070378946	-2.58222	0.138129713869767	-18.6942	5.52237352062921e-78	2.79543227988812e-76	75.5535510241805	down-regulated
TNRC6C	1283.3445227517	-1.76382	0.0947048730490463	-18.6244	2.03873577757013e-77	1.02360314437187e-75	74.9898683886883	down-regulated
AMIGO3	1109.27013487054	-3.22351	0.173816645360198	-18.5454	8.87549358975633e-77	4.42912283349541e-75	74.3536822751974	down-regulated
FOS	846.788312667937	-2.48773	0.13421185330751	-18.5359	1.06070340109246e-76	5.28251722095583e-75	74.2771590784775	down-regulated
RGL1	998.726444728177	-1.95566	0.10561927817228	-18.5161	1.53062791162281e-76	7.57691551753523e-75	74.1205075550988	down-regulated
SLC4A8	673.91109635945	-2.44568	0.132256823684556	-18.4919	2.3988220365068e-76	1.18508538765462e-74	73.9262503567836	down-regulated
CST3	19184.7265712316	-1.00791	0.05452101190799	-18.4867	2.64460655519607e-76	1.30389681597387e-74	73.8847567751886	down-regulated
SLC25A25	1837.94757154954	-1.53478	0.0833116582459062	-18.4222	8.7221397078483e-76	4.24937130588688e-74	73.3716753190276	down-regulated
UCN2	1161.24785793834	-2.11112	0.114602348625581	-18.4213	8.87172336935643e-76	4.31372237675295e-74	73.3651478087291	down-regulated
FER1L6	302.885266191721	-5.11484	0.27770842605986	-18.418	9.41795058166759e-76	4.57030153030058e-74	73.3400551459639	down-regulated
ZFP90	4733.88800791554	-1.41882	0.0770424460178319	-18.416	9.77295997526045e-76	4.73326147957015e-74	73.3248395031387	down-regulated
GTF2B	2476.91129278522	-1.43591	0.0782112390166977	-18.3593	2.77965864690342e-75	1.3331545712736e-73	72.8751194938274	down-regulated
CPT2	3240.89507276605	-1.23635	0.0674012665720605	-18.3431	3.75013215476508e-75	1.79163290463699e-73	72.7467509700211	down-regulated
PYGM	355.634143699809	-4.35697	0.237558005799017	-18.3407	3.91903692144336e-75	1.86870596107199e-73	72.7284590290278	down-regulated
HIC1	905.972197472021	-3.08897	0.168458549478838	-18.3367	4.21665245157894e-75	2.00673583467807e-73	72.6975097939761	down-regulated
ADGRE5	10678.5773010148	-1.05964	0.0578239673350742	-18.3253	5.19835013228869e-75	2.45968766720117e-73	72.6091200364018	down-regulated
ICOSLG	1069.74233829756	-2.52352	0.137937100375811	-18.2947	9.12271448041665e-75	4.29185414830594e-73	72.3673550452481	down-regulated
NKX3-1	1342.41159912684	-1.84712	0.100974829782418	-18.2928	9.4357345981765e-75	4.43066151074756e-73	72.3535314274971	down-regulated
WNT11	368.788921254054	-4.57003	0.249863532639067	-18.2901	9.92005918466184e-75	4.64922621711566e-73	72.3326193218628	down-regulated
CDH3	348.041579535335	-6.50358	0.355950976116535	-18.271	1.40847348174682e-74	6.54825917259607e-73	72.1838741400419	down-regulated
MAP2K3	7220.28216409306	-1.13399	0.0621333749333976	-18.2508	2.03804174727847e-74	9.44394833720092e-73	72.0248	down-regulated
INSYN1	362.100196363089	-4.53286	0.248703655891444	-18.226	3.21198286655941e-74	1.48280527390304e-72	71.8289158779818	down-regulated
RNF103	4452.2112465396	-1.5564	0.085424531780346	-18.2196	3.60984054842725e-74	1.66336054579119e-72	71.7790136040119	down-regulated
CACNA1A	305.041314452423	-5.54377	0.304282296885977	-18.2192	3.63569905310809e-74	1.67215024360486e-72	71.7767247035495	down-regulated
DUSP6	1502.02175760523	-1.82094	0.100030244052117	-18.2039	4.80843474738021e-74	2.19921212230829e-72	71.6577328792772	down-regulated
SDCBP	18484.8367137801	-1.06768	0.0586717724879397	-18.1975	5.400140392011e-74	2.46070722631895e-72	71.6089400553577	down-regulated
POLH	3482.82723875217	-1.35908	0.0747578053437723	-18.1797	7.47284522118016e-74	3.392644206124e-72	71.4694616833608	down-regulated
NEU1	642.212505764435	-2.27926	0.125419529907328	-18.1731	8.42645279094216e-74	3.81153971013406e-72	71.418899551218	down-regulated
ALOXE3	444.876464170452	-3.33883	0.18390514039938	-18.1552	1.16852009164218e-73	5.26624447882322e-72	71.278498983183	down-regulated
DUSP14	1972.84991320947	-1.61537	0.0890312819928833	-18.1439	1.43485467274885e-73	6.44299406058373e-72	71.1909122690039	down-regulated
SLC43A2	872.813157052737	-2.06091	0.113734272175082	-18.1204	2.19967763454543e-73	9.82363279833585e-72	71.0077278795739	down-regulated
CYP26A1	492.520469419877	-3.61093	0.199388964457154	-18.11	2.65849319208923e-73	1.1851206902601e-71	70.9262374197425	down-regulated
SAMD8	3908.94243799251	-1.29385	0.0714936249503643	-18.0974	3.34054339154302e-73	1.48648151061947e-71	70.8278404883332	down-regulated
YIPF4	4161.76566679257	-1.11184	0.0615516068353299	-18.0635	6.17445217799518e-73	2.72782428480174e-71	70.5641836085752	down-regulated
ZNF596	489.136410869339	-3.51238	0.19498060154104	-18.014	1.51240746001842e-72	6.63414033885659e-71	70.1782153456374	down-regulated
ITGA9	268.284531928848	-5.14738	0.285968969216376	-17.9998	1.95535016405644e-72	8.53155614943706e-71	70.0689717466197	down-regulated
ABCD1	3412.73080299645	-1.69853	0.0943830906373215	-17.9962	2.08757973486479e-72	9.09240558725917e-71	70.0413211998301	down-regulated
RP2	2400.39759672313	-1.71707	0.0955261458375228	-17.9749	3.0668575344934e-72	1.33105936514668e-70	69.8758025745924	down-regulated
ADAMTSL4	798.805672921912	-2.15485	0.120225049274534	-17.9234	7.73875689924705e-72	3.33524187203214e-70	69.4768726655316	down-regulated
ZNF331	2556.65520150957	-1.43604	0.0801909732984368	-17.9077	1.02642898813543e-71	4.40061346356775e-70	69.3564867768613	down-regulated
VAMP1	3151.6759975076	-1.44936	0.0809855692323492	-17.8965	1.25496162558867e-71	5.37106145729374e-70	69.2699398782685	down-regulated
SERPINB9	5190.06528688061	-1.05502	0.0589668737040966	-17.8918	1.36566922125912e-71	5.83474482538645e-70	69.2339781324806	down-regulated
CNNM4	3549.07273161424	-1.21966	0.0682608355389791	-17.8676	2.10878338941904e-71	8.94762962408921e-70	69.048292001279	down-regulated
NEB	420.165973986493	-3.24563	0.181762781291284	-17.8564	2.57717154294388e-71	1.08975013510553e-69	68.9626730684671	down-regulated
ERFE	879.557885399031	-2.78755	0.156388055228188	-17.8245	4.55806869206659e-71	1.91423355020146e-69	68.7180050762896	down-regulated
ADAMTS7	1648.48510512164	-1.54931	0.0870242981191194	-17.8032	6.68019663658071e-71	2.78646713172568e-69	68.5549460753763	down-regulated
ENO3	4579.29152206825	-1.17016	0.0657279268938994	-17.803	6.69694676884078e-71	2.78873533353823e-69	68.5545927007351	down-regulated
ZNF385A	2123.18576688706	-1.66199	0.0934026225259852	-17.7939	7.88371970954495e-71	3.26637745007903e-69	68.485933631291	down-regulated
LAMC2	4387.29258609393	-1.10527	0.0621430013481976	-17.7859	9.0958490717775e-71	3.75596099359228e-69	68.4252789266178	down-regulated
GIPR	735.838722167102	-2.83329	0.159332643479084	-17.7822	9.70201265848263e-71	3.99288841497352e-69	68.3987128264043	down-regulated
PHLDB3	1504.76857188738	-1.84662	0.103963517505838	-17.7622	1.38699392220368e-70	5.66095598843791e-69	68.2471	down-regulated
PLCXD2	1277.50667781544	-1.61614	0.0910779273793228	-17.7446	1.89757431074481e-70	7.73206643115391e-69	68.1117044233243	down-regulated
KLHL29	1437.99367439639	-1.69206	0.095391859855564	-17.7379	2.13608194223993e-70	8.6895531419305e-69	68.0610025564608	down-regulated
TUBB2A	4013.99289077586	-1.09901	0.0621662900728669	-17.6786	6.12882605231672e-70	2.48091658196571e-68	67.6053878381466	down-regulated
SEMA3G	348.247480099712	-4.3156	0.2446302581336	-17.6413	1.1865168181613e-69	4.74837866904422e-68	67.3234546546461	down-regulated
TAF3	2130.63845602428	-1.44824	0.082157695317973	-17.6276	1.5121994161742e-69	6.02241357149055e-68	67.2202294239065	down-regulated
NFASC	385.707776348985	-3.38227	0.192147076496642	-17.6025	2.35748646182244e-69	9.32853230446979e-68	67.0301866801775	down-regulated
KCNK6	2156.07721803506	-1.80371	0.102557832151033	-17.5873	3.08422295666439e-69	1.21651622924305e-67	66.9148820928789	down-regulated
H2BC12	4015.6490546086	-2.09948	0.11954090563479	-17.5628	4.74351026862856e-69	1.86800343677686e-67	66.7286223290846	down-regulated
ATP2A1	690.679365049987	-2.47152	0.140983315066378	-17.5306	8.37142119552062e-69	3.29142384867583e-67	66.4826161884171	down-regulated
PNPLA2	8717.09717512853	-1.22109	0.0696894136978834	-17.5218	9.76544854899829e-69	3.82731061414795e-67	66.417106290183	down-regulated
NRARP	611.15	-2.34872	0.134073843858376	-17.5181	1.04271630793481e-68	4.07369927467652e-67	66.3900110342875	down-regulated
RBM38	3136.02018311739	-1.27844	0.0730261351150926	-17.5065	1.27709158610231e-68	4.98146547161301e-67	66.3026428755918	down-regulated
CORO1A	660.32326762307	-2.30473	0.131708743845408	-17.4987	1.46686927661269e-68	5.71267952718106e-67	66.2431601385302	down-regulated
HMGCL	3169.08865159783	-1.31294	0.0750692362204886	-17.4897	1.71511065126555e-68	6.64794147405635e-67	66.1773128125702	down-regulated
NEFH	1546.84428294526	-8.73921	0.500081869107235	-17.4756	2.19986559907857e-68	8.51351440321583e-67	66.0698911248916	down-regulated
TXNIP	674.821662500174	-2.45845	0.140776490972722	-17.4635	2.71812838400989e-68	1.04844560712638e-66	65.9794540956112	down-regulated
ELL	1519.23253412687	-1.53346	0.0879586732803596	-17.4339	4.56291672066891e-68	1.74937827368476e-66	65.7571162714756	down-regulated
CRY2	2067.76640842423	-1.573	0.0902955776314947	-17.4206	5.75756217764633e-68	2.2039661925984e-66	65.6567950715628	down-regulated
RNA5-8SN3	428.886033695749	-4.2845	0.246107108468022	-17.4091	7.03891470458194e-68	2.69028411313727e-66	65.5702018529894	down-regulated
ZNF622	4231.30647529195	-1.14551	0.0658984036128755	-17.383	1.10940361284292e-67	4.23359409656402e-66	65.3732907830839	down-regulated
KLHL21	4052.24354391503	-1.30843	0.0753551327080216	-17.3636	1.55717128809572e-67	5.91485155533678e-66	65.228056150361	down-regulated
GRIN2C	468.913775043688	-3.07659	0.177859328608914	-17.2979	4.88216997905469e-67	1.83468375493378e-65	64.7364387844492	down-regulated
EOMES	458.070394295615	-3.19529	0.185016131905487	-17.2703	7.86872183678608e-67	2.93020741269563e-65	64.5331016373247	down-regulated
TINAGL1	3312.3549786129	-1.19054	0.0690134150346761	-17.2509	1.10169292029349e-66	4.09020088419805e-65	64.3882553617344	down-regulated
CGREF1	1453.88250302188	-1.52612	0.0885405496954046	-17.2364	1.41518846236392e-66	5.23832221834764e-65	64.2808077908771	down-regulated
ABHD5	2089.29853759143	-1.31645	0.0764539468386631	-17.2188	1.91812738545556e-66	7.05756362779859e-65	64.151345197761	down-regulated
ISG15	826.691352004353	-2.554	0.148403627644712	-17.2098	2.24135531309685e-66	8.22230523489042e-65	64.0850064050346	down-regulated
KITLG	3894.14184466223	-1.36743	0.0796030644095751	-17.1781	3.87418001931888e-66	1.41911271673475e-64	63.8479831081988	down-regulated
KDM6B	2427.69678229019	-1.30013	0.0757304694006123	-17.1678	4.62528339858255e-66	1.69172828400381e-64	63.7716693896622	down-regulated
HES6	926.087775769262	-1.78376	0.103939514983968	-17.1615	5.15221284699674e-66	1.88166446080242e-64	63.7254578175793	down-regulated
TPPP3	587.960684784654	-2.46618	0.143753549041233	-17.1556	5.70855999525266e-66	2.08176658288415e-64	63.6815679671638	down-regulated
DLX3	326.199310489031	-6.57268	0.383194964918475	-17.1523	6.03945703970825e-66	2.19918308630558e-64	63.6577386132666	down-regulated
RETREG3	6696.1290317744	-1.05734	0.0616462698297393	-17.1518	6.09413300108798e-66	2.21581956847818e-64	63.6544656065811	down-regulated
DUSP5	3770.79812932593	-1.08807	0.0634983841692979	-17.1355	8.07071957956564e-66	2.92587322169782e-64	63.5337444958149	down-regulated
ZER1	3315.62729892847	-1.09519	0.0639906221667864	-17.1149	1.14997703808478e-65	4.1567791705082e-64	63.3812430468378	down-regulated
DGKH	1591.83655866059	-1.60714	0.0939793218508972	-17.101	1.45787504104332e-65	5.26201105590043e-64	63.2788482437624	down-regulated
ENSG00000279602	374.85595984909	-4.00438	0.23431715803414	-17.0896	1.77470101480125e-65	6.39618851123983e-64	63.194078745022	down-regulated
PLXDC1	281.908283713936	-5.36093	0.313834052241967	-17.0821	2.01891921064031e-65	7.26575129645326e-64	63.1387194719325	down-regulated
ATP6V1B2	8244.50585399381	-1.1426	0.0668964336683484	-17.0802	2.08385414742369e-65	7.48850910237445e-64	63.1256046379831	down-regulated
OSBPL8	3510.35596250597	-1.48567	0.0869902984808644	-17.0786	2.14215831251752e-65	7.68682485009924e-64	63.114253014534	down-regulated
ATP6V1D	5744.93550948238	-1.18821	0.0695977996762252	-17.0725	2.37886873309542e-65	8.51144731614926e-64	63.0699965846895	down-regulated
MFSD2A	900.672674819184	-1.9116	0.112226115155608	-17.0335	4.63382781380769e-65	1.65076767725415e-63	62.7823140433854	down-regulated
MAD2L1BP	2460.59567918221	-1.34557	0.0791242178189575	-17.0058	7.43633191740267e-65	2.64150510702897e-63	62.5781485453207	down-regulated
WNT9A	1119.6396939276	-1.92819	0.113606625004146	-16.9725	1.31139668242055e-64	4.6382426133474e-63	62.3336465383884	down-regulated
RNA5-8SN1	289.844512580012	-4.50748	0.26660912162733	-16.9067	4.01702805724268e-64	1.41065207503058e-62	61.8505800879656	down-regulated
TM7SF2	2307.01044606739	-1.46923	0.0871256848496509	-16.8634	8.36784146573484e-64	2.91361621205219e-62	61.5355676550248	down-regulated
RNF19B	3823.03026256932	-1.16979	0.0694834140464967	-16.8355	1.34119379739404e-63	4.64369515356149e-62	61.3331362982943	down-regulated
DOCK8	379.181180153048	-3.02528	0.180176246740541	-16.7907	2.85486131547796e-63	9.78832283020345e-62	61.0092917155499	down-regulated
ENSG00000233586	301.345481389786	-5.7903	0.344922210470244	-16.7873	3.02513958471834e-63	1.03577418114551e-61	60.9847349188885	down-regulated
ZMAT1	416.970838547038	-3.16559	0.188649666387011	-16.7803	3.40392103692685e-63	1.16062878841384e-61	60.9353066613312	down-regulated
PGAP6	6216.68805735214	-1.07754	0.0642250355178182	-16.7775	3.56247900234749e-63	1.21134113608097e-61	60.9167335342688	down-regulated
ADM	3047.58272271329	-1.52751	0.0910682106143446	-16.7732	3.83108132967206e-63	1.30087902119939e-61	60.885763089963	down-regulated
NPTXR	2831.85737543847	-1.38589	0.0831097833282339	-16.6754	1.97739559556105e-62	6.65939292647147e-61	60.1765653595234	down-regulated
PLIN2	4107.02094876432	-1.19402	0.0716507880070126	-16.6644	2.37918809482354e-62	7.99070094190599e-61	60.0974151228325	down-regulated
SPTBN5	377.300628599075	-3.11622	0.187237855104367	-16.6431	3.39381103425554e-62	1.13674225022374e-60	59.9443379979291	down-regulated
ABCA12	540.602912498889	-2.50374	0.15056495774851	-16.6289	4.30151725302623e-62	1.43492562004875e-60	59.8431706101771	down-regulated
MYO15A	266.391937813659	-5.50455	0.331187989272552	-16.6206	4.94095959577071e-62	1.64378591032307e-60	59.7841547464188	down-regulated
ADARB1	2621.65337563209	-1.39674	0.0840371820178809	-16.6205	4.94921954836617e-62	1.64431482892618e-60	59.7840150265921	down-regulated
EPHB3	590.627196164017	-2.56934	0.154758067557302	-16.6023	6.70642348268221e-62	2.21617629618072e-60	59.6543956945695	down-regulated
CARD14	871.734228767101	-2.31304	0.139835817271096	-16.5411	1.85657764278369e-61	6.06900489462415e-60	59.2168825122529	down-regulated
DNASE1	3203.88208066784	-1.34862	0.0815321641838447	-16.541	1.85871275979281e-61	6.06900489462415e-60	59.2168825122529	down-regulated
H2AC17	301.901202620657	-3.53308	0.213960602672557	-16.5128	2.96978116012959e-61	9.67120807919613e-60	59.0145192726225	down-regulated
CREBRF	825.55742330822	-2.21991	0.134546877929048	-16.4991	3.72246495837037e-61	1.210635965089e-59	58.9169864283851	down-regulated
CDK2AP2	9622.79914577709	-1.09401	0.06644112294714	-16.4659	6.44702724951303e-61	2.08572330387133e-59	58.6807433064427	down-regulated
SPINT1	513.936746659296	-2.54892	0.15482727502805	-16.463	6.76413465810632e-61	2.18544492256405e-59	58.6604601340967	down-regulated
APOE	492.726607133806	-3.26621	0.198442437387834	-16.4592	7.1996786916815e-61	2.32312145428446e-59	58.6339280844113	down-regulated
ESPN	230.309714963597	-4.3167	0.262537745964813	-16.4422	9.53531468920047e-61	3.0647272192721e-59	58.5136081744692	down-regulated
EPM2AIP1	3039.13734931166	-1.06296	0.0646935609408894	-16.4308	1.15224457895904e-60	3.69858507298155e-59	58.4319643874254	down-regulated
FRS2	2153.3764406335	-1.46092	0.0889861961606525	-16.4173	1.43761006785137e-60	4.60259264839895e-59	58.336997460557	down-regulated
TRANK1	1037.8569875767	-1.75185	0.106709930473128	-16.4169	1.44728012138181e-60	4.62754209498111e-59	58.3346496219462	down-regulated
ZNF530	915.673213617325	-1.8178	0.110744462595501	-16.4143	1.510398019868e-60	4.8230999981588e-59	58.3166737336829	down-regulated
CASS4	228.443701287083	-5.17269	0.315292651699729	-16.406	1.73265605192052e-60	5.52567102095016e-59	58.2576149750183	down-regulated
DISC1	342.231466873173	-3.21452	0.19619259366098	-16.3845	2.46711081213476e-60	7.82744089327493e-59	58.1063802031517	down-regulated
H1-2	1769.63828992263	-1.36378	0.0832963618561233	-16.3726	2.99917329308239e-60	9.49109371258884e-59	58.0226837384712	down-regulated
HPCAL4	335.635601114917	-7.15627	0.437538055152946	-16.3558	3.95707249690084e-60	1.24743927357544e-58	57.9039805870216	down-regulated
ARHGEF6	242.113342564062	-4.00032	0.244623678691599	-16.353	4.14410093011986e-60	1.3047302187652e-58	57.8844792788344	down-regulated
BLCAP	5461.0480992062	-1.08658	0.0665228378980134	-16.3339	5.66742341112273e-60	1.77978754052226e-58	57.7496318378517	down-regulated
PODNL1	259.472831902611	-3.9848	0.244110849627017	-16.3237	6.6932148442183e-60	2.09925104757849e-58	57.6779356214183	down-regulated
DAPK3	4865.47598210704	-1.23179	0.0755038661981415	-16.3142	7.81646553051604e-60	2.44843085461603e-58	57.6111121562497	down-regulated
KCNA7	222.331443050178	-4.86056	0.298242953856639	-16.2973	1.03103353375634e-59	3.20922205481834e-58	57.4936002318463	down-regulated
GUCA1B	386.361651369327	-3.28107	0.201388612409796	-16.2922	1.12072311507684e-59	3.48399321978238e-58	57.4579226988463	down-regulated
DCHS1	377.111460236959	-2.79163	0.171415324790094	-16.2858	1.24515358433615e-59	3.86107247308865e-58	57.4132920465067	down-regulated
EFNB2	491.568856729135	-2.41901	0.14865217533371	-16.273	1.53522604164761e-59	4.7367199472712e-58	57.324522291639	down-regulated
KLHL15	1762.03197938797	-1.51708	0.0933618077406201	-16.2495	2.25296404266912e-59	6.92519570821436e-58	57.1595679487911	down-regulated
UBALD2	1918.90657202247	-1.47995	0.0911980494282851	-16.2279	3.20342192348465e-59	9.82223348976911e-58	57.0077897462263	down-regulated
ABCG4	311.427536292971	-3.96552	0.244953265414267	-16.1889	6.04258699391368e-59	1.83676762729914e-57	56.7359457835772	down-regulated
SPTLC1	6202.32350847042	-1.00955	0.0624801643238411	-16.1579	9.99883511793301e-59	3.02443292426116e-57	56.5193560428135	down-regulated
DNAH12	705.611644548603	-9.14268	0.5659715528135	-16.154	1.06493520065844e-58	3.21725276551862e-57	56.4925148171342	down-regulated
IFI6	591.198186129418	-2.47106	0.152974808536008	-16.1534	1.07487706871144e-58	3.2433132800336e-57	56.4890110996716	down-regulated
SUSD5	427.188852821851	-2.62703	0.162868202287173	-16.1298	1.57528347026123e-58	4.74162247971672e-57	56.3240730268029	down-regulated
LGR5	307.77074322955	-6.94763	0.431036365206106	-16.1184	1.89339265035129e-58	5.6921848312756e-57	56.2447210063566	down-regulated
MARCKSL1	8768.21616562444	-1.55328	0.0965310927629428	-16.091	2.95050448308865e-58	8.83789022078996e-57	56.0536513972975	down-regulated
PHF24	277.143982835489	-6.60225	0.411724797881575	-16.0356	7.20994786376883e-58	2.14920960988669e-56	55.6677212262127	down-regulated
S100A2	648.405368322371	-2.14816	0.134201632747957	-16.0069	1.14295030441356e-57	3.39879504275068e-56	55.4686750238507	down-regulated
ZNF117	511.044249049781	-2.68526	0.16777284033768	-16.0053	1.17265279081097e-57	3.48292007217734e-56	55.4580564918382	down-regulated
PPP1R13B	2913.44750648565	-1.28902	0.0805458636837049	-16.0036	1.20681136962061e-57	3.58006183921627e-56	55.4461094716247	down-regulated
CAMK2B	287.365135419246	-3.37638	0.211043411080923	-15.9985	1.30821331681833e-57	3.87621089978431e-56	55.4115926015591	down-regulated
ENSG00000170846	2321.33159345477	-1.60642	0.100493273092783	-15.9854	1.61599729261168e-57	4.78242079921525e-56	55.3203522135116	down-regulated
FBXW7	1515.15266269785	-1.58234	0.099124895824768	-15.9631	2.31038181742096e-57	6.79660293115294e-56	55.1677081015426	down-regulated
ANKDD1A	664.378339857156	-2.10632	0.13196264441109	-15.9615	2.37136903146949e-57	6.96769837470631e-56	55.1569106578046	down-regulated
H4C15	1417.50622464733	-1.72229	0.1081925630111	-15.9188	4.69602103007822e-57	1.37163874921195e-55	54.8627602544326	down-regulated
H2BC18	264.144700686734	-3.70777	0.23308817519672	-15.9071	5.65350885528413e-57	1.64740307683764e-55	54.7832001272243	down-regulated
ATP6V0D1	8986.12019921161	-1.24415	0.0784031143154965	-15.8687	1.04414073871078e-56	3.03182067028248e-55	54.5182964904443	down-regulated
APLN	401.996332696519	-2.9821	0.187975771027017	-15.8643	1.12029102669355e-56	3.24910757529992e-55	54.4882359092811	down-regulated
CCNG2	1034.51209564627	-1.64621	0.103994255862196	-15.8299	1.93644503852321e-56	5.59639426608137e-55	54.252091697048	down-regulated
IL32	1823.73400199798	-1.37212	0.0866809906373925	-15.8296	1.94525899956043e-56	5.61528394111988e-55	54.2506282784152	down-regulated
FRMD8	4611.51502307446	-1.10308	0.0696872227944509	-15.829	1.96259284194517e-56	5.65869458943068e-55	54.2472837451359	down-regulated
NLRC4	293.96934737778	-3.11464	0.196807634134795	-15.8258	2.06571572085251e-56	5.94906821851123e-55	54.2255510509518	down-regulated
ZFYVE1	2145.04352781021	-1.21004	0.0764985164529384	-15.8178	2.34425093570733e-56	6.73548648800198e-55	54.1716310307614	down-regulated
THY1	425.367244971575	-2.81497	0.178178113498294	-15.7987	3.17850275463415e-56	9.1006329741279e-55	54.0409284002492	down-regulated
CTSW	267.548840125354	-6.53931	0.414360267863107	-15.7817	4.15775153803543e-56	1.18905905934628e-54	53.9247965738832	down-regulated
RMND5A	3867.51271521842	-1.03324	0.0655552900792541	-15.7614	5.73737323891902e-56	1.63701070701194e-54	53.7859484800377	down-regulated
ATP13A3	7504.19113406353	-1.0222	0.0650246839201744	-15.7202	1.09897113626191e-55	3.11758762383528e-54	53.5061813312694	down-regulated
HYDIN	205.43363080413	-5.20832	0.331743437575857	-15.6998	1.51651404211706e-55	4.29220484113314e-54	53.3673195599468	down-regulated
PCYOX1L	1515.56421867291	-1.34158	0.0854977884419687	-15.6914	1.73329201669658e-55	4.88891473633913e-54	53.3107875368536	down-regulated
BBC3	1442.7	-1.7456	0.111355557497369	-15.6759	2.20901352297711e-55	6.2094186280994e-54	53.2069490597957	down-regulated
SMPD3	363.574942272201	-3.38418	0.216816837283188	-15.6085	6.37215501097347e-55	1.77098495299344e-53	52.7517851287363	down-regulated
TCHH	282.526556616358	-3.95643	0.254053412825328	-15.5732	1.10700254883984e-54	3.04573960200889e-53	52.5163072297737	down-regulated
EID3	840.432340641807	-1.90096	0.12215386193669	-15.562	1.3185933494295e-54	3.61981773386815e-53	52.4413132966404	down-regulated
LRTOMT	540.346550244874	-2.74872	0.176631368900035	-15.5619	1.32075539120755e-54	3.62171990033911e-53	52.4411	down-regulated
MYH15	233.415292249387	-4.32565	0.278009635182199	-15.5593	1.37513400142071e-54	3.76664482255816e-53	52.4240453298566	down-regulated
ERN1	2691.69766375361	-1.07843	0.0693585953449119	-15.5487	1.62480708939419e-54	4.44065902081436e-53	52.3525525731591	down-regulated
AOC3	404.269059903697	-2.80026	0.180310435375144	-15.5302	2.16729634827399e-54	5.91019796212947e-53	52.2283979721779	down-regulated
DNASE1L1	2566.24392111347	-1.12029	0.0721525724088522	-15.5266	2.29131297861558e-54	6.23459685969441e-53	52.205191623544	down-regulated
H2BC15	329.147922413501	-3.24989	0.209310756542063	-15.5266	2.29105737646728e-54	6.23459685969441e-53	52.205191623544	down-regulated
ISCU	7779.29722675512	-1.17448	0.075665168566496	-15.5221	2.45786067883448e-54	6.68039486820592e-53	52.1751978662648	down-regulated
S100A13	6157.13849510612	-1.16666	0.0751981313972107	-15.5144	2.77116165969869e-54	7.52364286727888e-53	52.1235718277483	down-regulated
CLDN6	207.971	-5.3914	0.347684742658997	-15.5066	3.13071470256474e-54	8.48114053270616e-53	52.071545740461	down-regulated
AOC2	607.616735727882	-2.25512	0.145467007586329	-15.5027	3.32868708218209e-54	9.00755147639439e-53	52.0453932472903	down-regulated
AVIL	381.155556426745	-2.82063	0.182262615923509	-15.4756	5.06616261615027e-54	1.36343931018926e-52	51.8653641887356	down-regulated
ENSG00000216775	720.176177928489	-2.11094	0.136537975180784	-15.4604	6.41496495550127e-54	1.72080213365634e-52	51.7643	down-regulated
H4C8	623.941167475024	-2.2104	0.143169549046145	-15.439	8.94161054325165e-54	2.3907655435167e-52	51.6214630119852	down-regulated
STING1	316.449854200719	-3.19003	0.206798224057433	-15.4258	1.09744543437877e-53	2.92794641215428e-52	51.5334368760831	down-regulated
PREPL	6779.1580114175	-1.02662	0.066657712194567	-15.4014	1.60227050245072e-53	4.2701808028557e-52	51.3695537362115	down-regulated
PHYHIP	583.10735573606	-2.35941	0.153247814905523	-15.396	1.74005213406105e-53	4.62737488768855e-52	51.3346653146217	down-regulated
STK17A	4403.53116218827	-1.1671	0.0758866988226214	-15.3795	2.24687158642783e-53	5.9623119858578e-52	51.2245853026758	down-regulated
YPEL3	1001.41588860256	-2.33573	0.151907239878373	-15.376	2.37084450712128e-53	6.28452245048966e-52	51.2017277179775	down-regulated
PINLYP	380.956659615707	-4.57661	0.297766869390822	-15.3698	2.6110904761317e-53	6.89909993757755e-52	51.1612075639932	down-regulated
VWF	306.174931460219	-7.27215	0.473582579152352	-15.3556	3.24852027046012e-53	8.5649755836773e-52	51.0672738707474	down-regulated
NYNRIN	415.622325392793	-3.18236	0.207675459590722	-15.3237	5.30889635985799e-53	1.39080672755812e-51	50.8567332172307	down-regulated
ATG9B	233.45116031157	-4.66614	0.30450918024826	-15.3235	5.32924203560402e-53	1.39465472040032e-51	50.8555332989033	down-regulated
ALPL	233.166107043294	-6.17749	0.403714506233744	-15.3016	7.45714615610187e-53	1.94327237886071e-51	50.711466322228	down-regulated
DNAJB2	5318.36526252279	-1.12847	0.0737844147982774	-15.2942	8.36427768675209e-53	2.17506512166469e-51	50.662527735695	down-regulated
BCL10	1331.65782296954	-1.58854	0.103948912802405	-15.2819	1.00933348608053e-52	2.61916727356393e-51	50.581836764398	down-regulated
ERO1B	968.826498268859	-1.76616	0.115592387101231	-15.2792	1.05146219599418e-52	2.72275693861854e-51	50.5649911265367	down-regulated
GATA2	1250.64091623418	-1.72155	0.112842585281116	-15.2562	1.49617146079694e-52	3.85811912673286e-51	50.4136243668207	down-regulated
LYPD5	199.292942750573	-5.26977	0.345527953378088	-15.2513	1.61268209780525e-52	4.15421515936206e-51	50.3815110137942	down-regulated
IRGQ	5444.91185632598	-1.01115	0.0662999144185614	-15.2511	1.61824515648377e-52	4.16419411248831e-51	50.3804690342005	down-regulated
MGME1	6411.36584098721	-1.08753	0.0714279356548363	-15.2256	2.39141626734858e-52	6.12182698054798e-51	50.2131189489065	down-regulated
CITED2	1446.42920364758	-1.36666	0.0897962785477858	-15.2195	2.6241160602254e-52	6.70359679965559e-51	50.1736921150446	down-regulated
KCNN3	275.485127097147	-7.00292	0.460130658141673	-15.2194	2.62880708729207e-52	6.70862860413292e-51	50.1733662504017	down-regulated
HES7	428.208298822499	-2.53377	0.166600101437501	-15.2087	3.09713743888681e-52	7.87932220262515e-51	50.1035111399115	down-regulated
CLN8	2312.90273106154	-1.3682	0.0899690272723169	-15.2074	3.15671139575425e-52	8.02260302351895e-51	50.0956846971357	down-regulated
CBX4	6123.35926582541	-1.05889	0.069725093913418	-15.1866	4.3396984478683e-52	1.09725380653179e-50	49.9596929038501	down-regulated
ADCY10	198.955455096232	-4.48798	0.296357257385727	-15.1438	8.32330120247266e-52	2.09160062429517e-50	49.6795212372153	down-regulated
ENSG00000279187	227.389544343329	-4.38431	0.289524265988987	-15.1432	8.40668547757385e-52	2.11040336449237e-50	49.6756345294269	down-regulated
CFAP70	357.192187660309	-3.52756	0.233007766288637	-15.1392	8.92498996139246e-52	2.23596394845779e-50	49.6505352030719	down-regulated
ENSG00000177359	212.505651662542	-5.28589	0.349965005894115	-15.104	1.52303863900827e-51	3.79635475519028e-50	49.4206332111492	down-regulated
EMP1	2080.37220197702	-1.18329	0.078398290630746	-15.0933	1.79122001489664e-51	4.45581794220302e-50	49.3510725620695	down-regulated
PKP1	279.134093444939	-7.12999	0.472539903146145	-15.0886	1.92355630355413e-51	4.78019253984037e-50	49.3205546102276	down-regulated
H2AW	633.269723603212	-2.48827	0.164969145846787	-15.0833	2.08723313614834e-51	5.1765061642182e-50	49.2859632644917	down-regulated
SPTBN4	534.27855167292	-2.06331	0.136816619133646	-15.0809	2.16414731225686e-51	5.36186528057851e-50	49.270684102072	down-regulated
LDHAL6B	225.536223829616	-3.67537	0.243783956292618	-15.0763	2.31793421515483e-51	5.731365523771e-50	49.2417418930787	down-regulated
CKB	5884.69665006671	-1.00939	0.0669532947657589	-15.0761	2.32714436682739e-51	5.74837303918125e-50	49.2404550561952	down-regulated
ZNF815P	460.725440144991	-2.52465	0.167602356192259	-15.0633	2.8212226945786e-51	6.94793025641873e-50	49.1581445496672	down-regulated
RNA5-8SN2	233.235511992395	-3.82636	0.254160734747507	-15.0549	3.20701584759601e-51	7.8792274138092e-50	49.103516364537	down-regulated
ACTG1P17	254.527553431883	-3.60399	0.239583043347712	-15.0428	3.85036547511817e-51	9.42593939350677e-50	49.0256753569751	down-regulated
LRAT	223.062551718183	-3.55164	0.237136698078333	-14.9772	1.03533212008592e-50	2.51458201225204e-49	48.5995341954427	down-regulated
H4C14	1309.9664724258	-1.74873	0.116848567342025	-14.9658	1.22848202176191e-50	2.98076169296009e-49	48.5256727437156	down-regulated
H3C6	530.953838212234	-2.1217	0.141876231569026	-14.9546	1.45440497055173e-50	3.52200307800012e-49	48.4532102688236	down-regulated
MYOM2	309.690302360943	-2.7478	0.183874360857031	-14.9439	1.70724866538453e-50	4.1302349459332e-49	48.3840252430603	down-regulated
TSPYL4	1648.11407103614	-1.37547	0.0920476334083607	-14.943	1.72887986724274e-50	4.17437281951695e-49	48.3794087660448	down-regulated
ST8SIA5	187.498712520302	-5.1931	0.347595908984282	-14.94	1.8087893548303e-50	4.36304062380396e-49	48.3602107433249	down-regulated
VSIR	5397.38332758665	-1.03875	0.0696038549374243	-14.9238	2.30847233807168e-50	5.56289932337664e-49	48.2546987997927	down-regulated
RFPL4A	1321.26933249188	-10.8428	0.728193938221428	-14.8899	3.83154883250964e-50	9.17042153582793e-49	48.0376107007012	down-regulated
KIF5A	278.424347214016	-3.52698	0.237206999908535	-14.8688	5.25745279139612e-50	1.25466337089542e-48	47.9014727807751	down-regulated
ZNF324	1860.08877394139	-1.39014	0.0935538048599027	-14.8593	6.05495249493807e-50	1.44219023096824e-48	47.8409774505661	down-regulated
HCN4	340.357143724653	-2.60576	0.175613071757684	-14.8381	8.31343911885495e-50	1.97440174526023e-48	47.7045644737548	down-regulated
EID2	4112.49071514897	-1.07336	0.0723450808767101	-14.8366	8.49090800722931e-50	2.01460889503577e-48	47.6958092528549	down-regulated
TUBB2B	2058.81625925421	-1.18963	0.0802715313243532	-14.8201	1.0866822485565e-49	2.5733804794827e-48	47.5894959977292	down-regulated
SLC12A4	8155.53331113105	-1.08627	0.07332248198671	-14.815	1.17252250218672e-49	2.76868052910987e-48	47.5577271534813	down-regulated
CERS5	3880.06150116159	-1.00896	0.0681462652752832	-14.8057	1.34509935133609e-49	3.17314729274041e-48	47.4985097681329	down-regulated
PLAT	551.944944850991	-2.29317	0.154962436346501	-14.7982	1.50431295129862e-49	3.54196016002041e-48	47.4507563280642	down-regulated
KLHL28	1143.27160837706	-1.6086	0.108712326798099	-14.7968	1.5353403324667e-49	3.61156582785966e-48	47.4423044648641	down-regulated
COQ10B	1813.16525157847	-1.23004	0.0832422209699646	-14.7767	2.07179946104751e-49	4.84573058005153e-48	47.314640736061	down-regulated
MSX1	583.19592856921	-2.0527	0.13910757692559	-14.7562	2.80769686454192e-49	6.54209292104797e-48	47.1842832916369	down-regulated
RPLP0P2	221.451810403439	-5.42286	0.368096639673746	-14.7322	4.00729561860753e-49	9.27585460938149e-48	47.0326460671533	down-regulated
CHST8	357.199039717021	-7.95537	0.54000486320552	-14.732	4.01420879699068e-49	9.28314026861297e-48	47.0323050872905	down-regulated
SYT16	202.23585570574	-4.77366	0.324238178327442	-14.7227	4.6092777459807e-49	1.06393178833255e-47	46.9730862149925	down-regulated
H2AC13	327.455421900703	-2.7975	0.190641127336088	-14.6742	9.4333533475208e-49	2.16125489519594e-47	46.6652940100492	down-regulated
UBA7	301.618383631597	-2.80938	0.191542486547768	-14.6672	1.04629430918735e-48	2.38826363982283e-47	46.6219177332377	down-regulated
TPPP	1010.15958995642	-1.57768	0.10759758023381	-14.6628	1.11534117563324e-48	2.5411636471082e-47	46.5949673661391	down-regulated
HBA1	344.971527423473	-7.88229	0.537822009194594	-14.6559	1.23439948405428e-48	2.80723395580315e-47	46.551721391612	down-regulated
ENSG00000277117	340.11361047907	-2.73652	0.186732237056122	-14.6548	1.25536184615581e-48	2.85227467570811e-47	46.5448086539954	down-regulated
KCND1	728.706662630317	-2.28712	0.156207671572866	-14.6415	1.52603680245242e-48	3.45770765202729e-47	46.4612117289564	down-regulated
TRPV3	330.174348922542	-3.0081	0.205972621515495	-14.6044	2.6341528453497e-48	5.93033204964025e-47	46.226920989049	down-regulated
NABP1	1578.21728714253	-1.32072	0.0905394319840935	-14.5873	3.38414063000106e-48	7.58416680098057e-47	46.120092123989	down-regulated
SGSH	4192.21624212559	-1.1821	0.0810408398660393	-14.5864	3.42603950870226e-48	7.67109227688719e-47	46.1151427930196	down-regulated
NPAS1	513.846010339275	-2.52598	0.173222587395335	-14.5823	3.64200854335173e-48	8.1398725848329e-47	46.089382393162	down-regulated
SPON1	207.467788960216	-4.22923	0.290077506251892	-14.5797	3.78429205106209e-48	8.45021446039697e-47	46.0731322688272	down-regulated
SCN4A	200.981923210845	-5.60659	0.384670364340209	-14.5751	4.04788231260731e-48	9.03062396112175e-47	46.0442822415458	down-regulated
PIDD1	4332.62499687523	-1.07282	0.0737137866060948	-14.5538	5.52180545360385e-48	1.22855187763756e-46	45.910606499993	down-regulated
STC1	2625.11970615435	-1.25442	0.086248378369795	-14.5443	6.34884160699443e-48	1.4100148044651e-46	45.8507763274413	down-regulated
CCDC92	3115.35007282616	-1.09947	0.0756813077375881	-14.5277	8.08994361052191e-48	1.7918534581005e-46	45.7466975108238	down-regulated
LRRC56	278.04385119245	-3.29314	0.226817504919908	-14.5189	9.19746053780263e-48	2.03168277041138e-46	45.6921441023995	down-regulated
RBBP5	3690.57171592836	-1.01422	0.0699330736307	-14.5027	1.1641597850112e-47	2.56698273882792e-46	45.5905770516468	down-regulated
DNAH2	258.153051825918	-4.00883	0.276458201647373	-14.5007	1.19984457755886e-47	2.64094361839115e-46	45.578240870464	down-regulated
MICB	258.841575225031	-3.01334	0.208077772777926	-14.4818	1.578825974434e-47	3.45966381526639e-46	45.4609661007067	down-regulated
GOLGA6B	236.951967549325	-6.88872	0.476190269740547	-14.4663	1.97802133420854e-47	4.31318459777475e-46	45.3652019543096	down-regulated
TRPV1	2171.15895636356	-1.05316	0.0729843621642117	-14.4299	3.35638632436764e-47	7.27718871313203e-46	45.1380363627439	down-regulated
MR1	1345.13278379393	-1.42736	0.0990246873289328	-14.4141	4.21648816062716e-47	9.10200228859726e-46	45.0408630596311	down-regulated
MYORG	2902.19985525374	-1.11991	0.0777514150823774	-14.4037	4.90570506214435e-47	1.05620472656753e-45	44.9762518933542	down-regulated
DSC3	663.657660618241	-2.03306	0.141204626972634	-14.398	5.32959738912091e-47	1.14546848157462e-45	44.941016856249	down-regulated
BMF	256.653456549182	-3.93209	0.273187146114569	-14.3934	5.69324541145442e-47	1.22202693369372e-45	44.9129192220594	down-regulated
SHBG	199.053546762204	-3.87526	0.269294423649931	-14.3904	5.94269237493516e-47	1.27279976044224e-45	44.8952399151014	down-regulated
CLDN9	309.818765059817	-4.17224	0.290462557280278	-14.3641	8.69202616819427e-47	1.85039576078001e-45	44.7327353751963	down-regulated
MIR3648-1	203.964306319908	-5.53531	0.385706506400247	-14.3511	1.04863742587255e-46	2.22661583312747e-45	44.6523547070544	down-regulated
EGLN3	1917.82927239169	-1.41416	0.0986089306993218	-14.3411	1.21048202812346e-46	2.5680553319535e-45	44.5903956230864	down-regulated
PMEL	420.841113710514	-2.48387	0.173208095130081	-14.3404	1.22407512077438e-46	2.59466035058728e-45	44.585919484644	down-regulated
SLC13A3	204.065316765642	-5.44316	0.379600228932966	-14.3392	1.24495328113553e-46	2.63664847822621e-45	44.5789477671132	down-regulated
ABHD3	2142.09453993715	-1.09692	0.0765393052044131	-14.3315	1.39110499038473e-46	2.9411252335304e-45	44.5314864827785	down-regulated
CDNF	324.473555183384	-2.98759	0.208798108175141	-14.3085	1.93581416067299e-46	4.07181661168178e-45	44.3902117901821	down-regulated
RNF223	197.715851200205	-5.45712	0.382345077583699	-14.2728	3.23476263751063e-46	6.75791258812813e-45	44.1701874300129	down-regulated
CLK1	3779.48052649442	-1.15006	0.0807280431901383	-14.2461	4.73894285335927e-46	9.84198982485365e-45	44.0069170882973	down-regulated
SOX8	231.446847963017	-3.21198	0.225772808033679	-14.2266	6.26433566604576e-46	1.29880910714348e-44	43.8864546747979	down-regulated
ENSG00000278952	171.088851287244	-4.74895	0.334625187392911	-14.1918	1.0291870269736e-45	2.12136443051448e-44	43.6733847173552	down-regulated
ANKZF1	3097.79908171799	-1.04357	0.0735732229947525	-14.1842	1.14822283561883e-45	2.36277039596623e-44	43.6265784792181	down-regulated
PIWIL2	188.472056374649	-4.84048	0.341285259748252	-14.1831	1.16580715549062e-45	2.39695396139739e-44	43.6203403074361	down-regulated
SLU7	3890.43967757052	-1.17051	0.082545076350662	-14.1803	1.213247040452e-45	2.49241383676856e-44	43.6033798464016	down-regulated
CSRNP1	2716.83048809128	-1.07596	0.0759456379832458	-14.1675	1.45626184903715e-45	2.98170823110165e-44	43.5255348557931	down-regulated
ATG2A	5263.18868222864	-1.28139	0.0904495488195507	-14.167	1.46731375579819e-45	3.00184387617735e-44	43.5226118988609	down-regulated
ZNF229	763.686249199366	-1.86268	0.131547152829266	-14.1598	1.62468531716719e-45	3.31828852019931e-44	43.4790858554175	down-regulated
GXYLT1	2303.77264614048	-1.14689	0.0810199279169735	-14.1557	1.72211383546407e-45	3.51145990668819e-44	43.4545122859273	down-regulated
NAT1	768.838079129158	-1.69643	0.119871223130618	-14.1521	1.8124541983109e-45	3.69261329725292e-44	43.4326661707305	down-regulated
DACT1	209.703767107058	-6.48552	0.458403269427557	-14.1481	1.91957738536365e-45	3.90440773135187e-44	43.4084448359259	down-regulated
DNAH17	736.913411771226	-2.01551	0.142634849140575	-14.1306	2.46087282451469e-45	4.98893395311976e-44	43.3019922455067	down-regulated
NDRG4	1925.85859451351	-1.23391	0.087400098793023	-14.118	2.9422405452777e-45	5.92582630083218e-44	43.227251082808	down-regulated
IL13	197.55398796138	-5.62569	0.399109987259465	-14.0956	4.04245508740645e-45	8.1284341610721e-44	43.0899931076288	down-regulated
ZNF483	928.208768406524	-1.97268	0.140275931588262	-14.0628	6.42557559202739e-45	1.2878316219078e-43	42.890140915281	down-regulated
ARID4A	1490.45106882375	-1.56479	0.111574110447074	-14.0247	1.10116979388447e-44	2.18919659345484e-43	42.659715236322	down-regulated
WDR47	1631.68072899617	-1.60726	0.114655523557666	-14.0182	1.20672464345321e-44	2.39518324560456e-43	42.6206612548964	down-regulated
GPR179	168.932182263996	-4.50631	0.321527877373922	-14.0153	1.25685509757647e-44	2.49067458725523e-43	42.6036830103965	down-regulated
TRIM73	458.529947269343	-2.27545	0.16238179460489	-14.013	1.29888790297685e-44	2.57190237623979e-43	42.5897455202988	down-regulated
NGFR	3311.76856348363	-8.37015	0.598416455687314	-13.9872	1.86704811275531e-44	3.6880184355484e-43	42.4332069166756	down-regulated
KLC3	213.802289229145	-3.57376	0.255642944363095	-13.9795	2.07902683756101e-44	4.10017356796433e-43	42.3871977583989	down-regulated
ING1	1300.38743041488	-1.32889	0.095065621312218	-13.9786	2.10532677883971e-44	4.14872228233066e-43	42.3820856361009	down-regulated
KCNC3	358.631468073648	-2.55502	0.182852577611893	-13.9731	2.27541638465683e-44	4.47674099876777e-43	42.349038030937	down-regulated
DNAJA4	278.371266390406	-2.83925	0.203224665420623	-13.971	2.3428571270219e-44	4.60575070935757e-43	42.336699572338	down-regulated
GREB1	472.225521300268	-2.08731	0.149674333708503	-13.9457	3.34228797987676e-44	6.53921295872395e-43	42.1844745189925	down-regulated
CXADR	1604.05005205716	-1.17054	0.0841993394274218	-13.902	6.16233452916909e-44	1.19711482122204e-42	41.9218641922572	down-regulated
ALG2	4289.32472064777	-1.04527	0.0751982324055351	-13.9002	6.31793551836906e-44	1.22637595589633e-42	41.9113763727687	down-regulated
RFX3	1125.14859351343	-1.44671	0.104198359158129	-13.8842	7.89436345776827e-44	1.52756552559579e-42	41.8160001514328	down-regulated
RASGRF1	170.107486496796	-4.3124	0.310841653211143	-13.8733	9.19499313470257e-44	1.77784290789559e-42	41.7501066163963	down-regulated
DNAI3	196.238051408635	-3.49481	0.252106534907882	-13.8624	1.06987395231332e-43	2.06373495089421e-42	41.6853460806667	down-regulated
LRRC17	171.680133468349	-4.65842	0.336111139689131	-13.8598	1.11034777625625e-43	2.13619394166585e-42	41.6703593209451	down-regulated
SLC5A2	242.711273471252	-3.44893	0.248845721523701	-13.8597	1.11090403748808e-43	2.13619394166585e-42	41.6703593209451	down-regulated
IFI30	6273.7886080029	-2.81853	0.203600727400159	-13.8434	1.3937994954443e-43	2.6635616404413e-42	41.5745372482714	down-regulated
ABCA1	907.427627448813	-1.7465	0.126274750593285	-13.8309	1.65879179817263e-43	3.1626090803211e-42	41.4999544864756	down-regulated
POLR2A	26793.1406068974	-3.06193	0.221532067986823	-13.8216	1.88746727103663e-43	3.59303808228533e-42	41.4445381797231	down-regulated
HMCN2	164.839117657109	-5.49561	0.397613084714555	-13.8215	1.89078434521255e-43	3.59657528381016e-42	41.4441108445802	down-regulated
SDCBP2	401.631613413783	-3.41303	0.246981868086317	-13.819	1.95900854809919e-43	3.72347561509185e-42	41.4290514859903	down-regulated
CASZ1	612.25119928289	-2.03604	0.147414419381221	-13.8117	2.16768108854372e-43	4.11059032267537e-42	41.3860958045301	down-regulated
GABPB2	1692.64350958861	-1.36596	0.0989097002852962	-13.8102	2.21295729824596e-43	4.19322239172631e-42	41.3774521037452	down-regulated
TAF1L	177.292443668428	-4.54245	0.328930725876281	-13.8097	2.22638069634163e-43	4.21541758265851e-42	41.3751593973473	down-regulated
DNAJC25	1083.01807043841	-1.88599	0.136648723865556	-13.8018	2.48653530448834e-43	4.7043797641018e-42	41.3274976268136	down-regulated
CGN	892.374472509602	-1.63472	0.11848411008222	-13.797	2.65722049965525e-43	5.01960151398476e-42	41.2993307583822	down-regulated
INKA2	826.687496123422	-1.8779	0.136109061600113	-13.797	2.65615697120149e-43	5.01960151398476e-42	41.2993307583822	down-regulated
NDUFB4P11	159.262615273088	-5.22804	0.379237048222277	-13.7857	3.10880579746366e-43	5.859195758339e-42	41.2321619917781	down-regulated
SLC25A45	1390.55360997581	-1.43973	0.104570082275709	-13.7681	3.96651220788904e-43	7.45861624324033e-42	41.1273417373622	down-regulated
METRNL	420.579163247472	-2.29063	0.166387625121908	-13.7668	4.03614983163171e-43	7.58377786961775e-42	41.1201143960566	down-regulated
PAIP2B	450.567181926285	-2.00005	0.145684314390443	-13.7286	6.84034839984335e-43	1.28136982335059e-41	40.892325507991	down-regulated
DNAH10	335.54273842879	-3.12541	0.227664352185342	-13.7282	6.88602711894162e-43	1.28894715669057e-41	40.889764887168	down-regulated
PLB1	297.238861015857	-3.92039	0.285815300112937	-13.7165	8.08436600409817e-43	1.51210766868762e-41	40.8204172840649	down-regulated
SERPINC1	177.389721506317	-5.0484	0.368151280151085	-13.7128	8.50555633999204e-43	1.58727460176748e-41	40.7993479329075	down-regulated
ENSG00000279259	523.118631990929	-2.99789	0.218924685923417	-13.6937	1.10688931252311e-42	2.05939889300527e-41	40.6862595250418	down-regulated
TEX19	225.772986179046	-3.01425	0.22022936301953	-13.6869	1.21638401209149e-42	2.25970600347245e-41	40.6459480605761	down-regulated
CDC42BPG	1287.44297054627	-1.51815	0.111042180340799	-13.6718	1.49578609060365e-42	2.77040711536899e-41	40.5574564060379	down-regulated
TNFRSF1B	288.823477439805	-3.68546	0.269650627463063	-13.6675	1.58659784356524e-42	2.9363971501179e-41	40.5321852060992	down-regulated
CD4	180.323299811893	-4.88679	0.358296506948119	-13.639	2.34913928084447e-42	4.33465430773786e-41	40.3630455321505	down-regulated
RGS20	1437.60941132739	-1.13581	0.0833565423044193	-13.626	2.80609878446737e-42	5.16238412199175e-41	40.2871496836637	down-regulated
5_8S_rRNA	214.556423316025	-3.69996	0.271755737324416	-13.615	3.25973075385187e-42	5.9879942283127e-41	40.2227186269351	down-regulated
NSUN6	1646.60850620408	-1.57536	0.115876950771374	-13.5951	4.27993658354319e-42	7.81548123388938e-41	40.1070442753814	down-regulated
DNAJC30	1621.11039218618	-1.45402	0.106963168587611	-13.5937	4.36517048961563e-42	7.95933305547371e-41	40.0991233220189	down-regulated
AATK	320.042063519217	-2.59957	0.191386179802123	-13.5828	5.06179158173054e-42	9.22271146140586e-41	40.0351413783382	down-regulated
CUBN	239.60830404499	-3.2636	0.24027750391732	-13.5826	5.07676570549163e-42	9.22953010116369e-41	40.0348204094472	down-regulated
MYBPC3	173.466978352511	-4.28181	0.315418318272937	-13.575	5.63178596546008e-42	1.02159519956234e-40	39.9907211564734	down-regulated
C1QL4	404.126143027494	-2.37905	0.175288307374162	-13.5722	5.85189834952859e-42	1.05996324843923e-40	39.9747091925435	down-regulated
JAG2	3966.01906288506	-1.05617	0.0779665301011586	-13.5464	8.32034300747334e-42	1.50155999868399e-40	39.8234573097675	down-regulated
PIPOX	190.094552612574	-4.37301	0.323063914924904	-13.5361	9.57838088268142e-42	1.72480822147453e-40	39.7632591863794	down-regulated
CYLD	1893.28412637826	-1.05786	0.0781844665692149	-13.5303	1.0362494876901e-41	1.8619258287563e-40	39.7300376234639	down-regulated
CDH23	739.185159006253	-1.52521	0.112746077482336	-13.5278	1.07185189961742e-41	1.92169403849954e-40	39.7163157571299	down-regulated
STON2	943.209796883768	-1.48652	0.109975446826348	-13.5168	1.2447616682464e-41	2.22684068545793e-40	39.6523108525221	down-regulated
ENSG00000257512	175.553073407756	-3.86274	0.285896591270851	-13.511	1.34718100122221e-41	2.40831805961784e-40	39.6182861576072	down-regulated
KCNAB1	182.430534726636	-3.6802	0.272622587676211	-13.4992	1.57982821475663e-41	2.81808430898556e-40	39.5500460181892	down-regulated
MUC20P1	249.482042593955	-2.9498	0.21857862998667	-13.4954	1.66528108447347e-41	2.96622176982947e-40	39.5277963820289	down-regulated
COL17A1	899.426144597937	-1.91009	0.141543874258427	-13.4947	1.67999768344314e-41	2.99027457705706e-40	39.5242889314663	down-regulated
TLL2	182.554685708857	-3.81536	0.28282148450682	-13.4903	1.78256598353203e-41	3.16826363561872e-40	39.4991786873317	down-regulated
TSC22D3	2340.42705625596	-1.07204	0.0794698754757307	-13.4898	1.79498210779865e-41	3.18803306350521e-40	39.4964771831281	down-regulated
CALML6	209.932349005398	-4.13907	0.307515885248805	-13.4597	2.70085132622677e-41	4.7762831344435e-40	39.3209099364679	down-regulated
PPFIA3	1332.13883872682	-1.2764	0.0948386090471362	-13.4586	2.74029639737516e-41	4.84256536115358e-40	39.3149245088026	down-regulated
MYADML2	161.555090334121	-4.42748	0.329330333785484	-13.4439	3.34457038718147e-41	5.88510700819398e-40	39.2302456360243	down-regulated
ZNF180	1902.67825235464	-1.22836	0.0913917717351721	-13.4405	3.4984585340034e-41	6.14711331291888e-40	39.2113287812306	down-regulated
ENSG00000284969	319.566913007039	-2.4152	0.179774360918436	-13.4346	3.78894064658218e-41	6.65277527204729e-40	39.1769971465913	down-regulated
ENSG00000285188	1022.11925223989	-5.51081	0.410493986832492	-13.4248	4.32562334731296e-41	7.58430062289894e-40	39.1200844609708	down-regulated
RUNDC3A	219.494737343017	-3.82632	0.285119377197201	-13.4201	4.61366850857657e-41	8.07211895482112e-40	39.0930124467412	down-regulated
RGS5	268.818313194814	-2.7403	0.204558370731154	-13.3962	6.36656667014892e-41	1.10917739613082e-39	38.9549989894689	down-regulated
ZDHHC11B	668.060448462978	-1.70366	0.127289226092992	-13.3842	7.48186013270385e-41	1.29889307036208e-39	38.8864266001688	down-regulated
NCF1	201.528563815645	-6.79309	0.507728577554339	-13.3794	7.98202988366767e-41	1.38475018080349e-39	38.8586285694765	down-regulated
RABL2A	1340.46785259175	-1.16985	0.0874428393231184	-13.3784	8.08397999736185e-41	1.401450597011e-39	38.8534222070893	down-regulated
OSTM1	2649.4256443863	-1.13502	0.0848883645579784	-13.3708	8.95865233421316e-41	1.55199365666214e-39	38.8091100581308	down-regulated
HSPB8	2197.14058634759	-1.12977	0.0844964666478923	-13.3706	8.9760306126429e-41	1.55391226589096e-39	38.8085735051716	down-regulated
ATF5	4487.22978404021	-1.10242	0.0825347406768112	-13.357	1.07751048286211e-40	1.86013924534431e-39	38.7304545443729	down-regulated
KIAA0513	1009.50392788239	-1.63482	0.122402560432701	-13.3561	1.09155758086963e-40	1.88307050270105e-39	38.7251334195687	down-regulated
HELZ	3512.38078921599	-1.19568	0.0895982259684468	-13.3449	1.26812867621108e-40	2.18309414287399e-39	38.6609275355464	down-regulated
CCDC186	1368.98014244706	-1.3479	0.101098144180959	-13.3326	1.49643590579979e-40	2.56895111070867e-39	38.5902441606428	down-regulated
ZSWIM3	454.549752494285	-2.15657	0.162101585929208	-13.3038	2.20005509273455e-40	3.76114827642802e-39	38.4246795449703	down-regulated
SPHK1	784.423939081113	-1.75078	0.13161276803919	-13.3025	2.23845992386727e-40	3.82415204734413e-39	38.4174648486109	down-regulated
DUSP28	892.113963811592	-1.55593	0.117049899005372	-13.2929	2.54452427419539e-40	4.33800915680947e-39	38.3627095355981	down-regulated
ARID3A	1272.6984026476	-1.37052	0.103142413621063	-13.2876	2.73035274902064e-40	4.65160027428175e-39	38.3323976125447	down-regulated
CDH15	168.206497722018	-6.04599	0.455305894873107	-13.279	3.06575330605111e-40	5.21580058666472e-39	38.2826790211424	down-regulated
ACYP2	740.668256063543	-1.82566	0.13753023094273	-13.2746	3.25066806739162e-40	5.52277527204261e-39	38.2578426283493	down-regulated
NHLH1	178.048757040732	-3.85888	0.290800713106506	-13.2698	3.46319979684652e-40	5.87576059131867e-39	38.2309359079103	down-regulated
RELT	2310.67653040974	-1.17597	0.0886333539554362	-13.2678	3.55654371171589e-40	6.02998043887347e-39	38.2196840966995	down-regulated
TRIM74	267.154776132548	-2.78502	0.210390992027128	-13.2374	5.33823758913336e-40	9.01975552072074e-39	38.044805233793	down-regulated
SFN	15609.7913104411	-1.00733	0.0760988902408469	-13.2371	5.35573882882619e-40	9.04312832933036e-39	38.0436813061239	down-regulated
PHKG1	344.083482095451	-2.33755	0.176701105138151	-13.2288	5.98109465541275e-40	1.00783284651562e-38	37.9966114915567	down-regulated
ZBP1	189.091456130988	-6.70555	0.50783682697624	-13.2041	8.30492794410641e-40	1.39749545172772e-38	37.854649596889	down-regulated
GPER1	183.179237789481	-3.57202	0.271215503588305	-13.1704	1.29877794875675e-39	2.18251356460473e-38	37.6610430484175	down-regulated
PLXNB3	814.75524332877	-1.62705	0.123660625985335	-13.1574	1.54366978615117e-39	2.5834723399999e-38	37.5877961838763	down-regulated
ABCA4	185.686863747872	-4.46775	0.339582992185312	-13.1566	1.55982379785508e-39	2.6087365172811e-38	37.5835697824825	down-regulated
PAK6	164.672	-4.77764	0.363851131684072	-13.1308	2.1942872646673e-39	3.65250301475883e-38	37.4374094169289	down-regulated
IGSF9	321.418488618979	-2.4077	0.183507506853474	-13.1205	2.51432074820535e-39	4.17957080814284e-38	37.3788683127765	down-regulated
MYCBPAP	432.602614153292	-1.97927	0.151375872911239	-13.0752	4.56332744749554e-39	7.5197291601377e-38	37.1237978012137	down-regulated
KCTD9	6775.4697416855	-1.05322	0.0808122323678436	-13.033	7.94585431651922e-39	1.29980889589139e-37	36.8861204950476	down-regulated
CEND1	395.84876319994	-2.10943	0.161915053426739	-13.028	8.48019318937801e-39	1.38537920811495e-37	36.8584313345776	down-regulated
ERI2	2274.50492639366	-1.11687	0.0857369028360939	-13.0268	8.61994522650703e-39	1.40727741538974e-37	36.8516202820271	down-regulated
CCDC200	216.739427142016	-3.78948	0.291040505179782	-13.0204	9.36250866917021e-39	1.52749545805681e-37	36.8160200724398	down-regulated
ROM1	315.160501308101	-2.65205	0.203916660485786	-13.0055	1.13800404140869e-38	1.85053269319308e-37	36.7327032378599	down-regulated
F8	1276.00393535361	-1.18944	0.0915124394695351	-12.9976	1.26267424346041e-38	2.04651186389126e-37	36.6889857333507	down-regulated
ARRDC4	412.007444913376	-2.32948	0.179773613553707	-12.9579	2.12070484710807e-38	3.41920313217189e-37	36.466075097343	down-regulated
SRMS	199.812633212494	-4.31447	0.332969440133081	-12.9576	2.12893039378268e-38	3.43022170376018e-37	36.4646778095176	down-regulated
BVES	692.088097736542	-1.60646	0.123985922331001	-12.9568	2.15098074241973e-38	3.46348643122999e-37	36.4604865094429	down-regulated
PTPN1	6979.39328644316	-1.09268	0.0843451402014762	-12.9549	2.20411929079484e-38	3.5467329475636e-37	36.4501715106444	down-regulated
MRC1	174.291350507245	-6.35487	0.490944531870743	-12.9442	2.53485929761026e-38	4.07096751822072e-37	36.3903023627922	down-regulated
GGN	219.717515836743	-3.02366	0.23360890661743	-12.9432	2.56559285909562e-38	4.1176429142204e-37	36.3853513185018	down-regulated
SLC16A10	204.671133076153	-4.23662	0.32734091183099	-12.9425	2.58987191285275e-38	4.15390516562433e-37	36.3815434227061	down-regulated
CHRNB4	207.31932691398	-3.23769	0.250192867465508	-12.9408	2.6487439237348e-38	4.24556795890184e-37	36.372064202966	down-regulated
DNALI1	145.81787247694	-5.74281	0.443820464328691	-12.9395	2.69412712722644e-38	4.31550499937532e-37	36.3649683759374	down-regulated
ZNF394	2184.89934333077	-1.01324	0.0783329394364695	-12.9351	2.85258628663954e-38	4.56339760793237e-37	36.3407116895863	down-regulated
EID2B	965.058747815973	-1.42125	0.109915753196226	-12.9304	3.03377721533245e-38	4.84696538641448e-37	36.314530081689	down-regulated
LRRN4	161.09218002695	-4.7499	0.367698339410339	-12.9179	3.56591778790386e-38	5.6934588929667e-37	36.2446238106287	down-regulated
GFY	286.294665708094	-4.05266	0.314308243390447	-12.8939	4.87089902072062e-38	7.74692920379386e-37	36.1108704128654	down-regulated
ULBP3	684.728593809559	-1.8742	0.145628179531197	-12.8698	6.65914299167361e-38	1.05434292248387e-36	35.9770181129182	down-regulated
TGFA	2239.04774099697	-1.27406	0.0990629845124721	-12.8611	7.44928046689818e-38	1.17717732096137e-36	35.9291581134397	down-regulated
ENSG00000277639	374.182152353362	-2.29324	0.178412754222695	-12.8536	8.2129861590743e-38	1.29537130386116e-36	35.8876057280269	down-regulated
KATNA1	1336.93916900268	-1.1646	0.0906077022292139	-12.8532	8.25684150989078e-38	1.30145560678918e-36	35.8855706412738	down-regulated
LOXL4	716.028248410349	-1.87124	0.145612786389973	-12.8508	8.51508214183939e-38	1.34130226811901e-36	35.8724733410272	down-regulated
ITGA1	548.97570438696	-1.94565	0.151418188753342	-12.8495	8.653335124146e-38	1.36220956245496e-36	35.8657560753771	down-regulated
FMN1	670.229864691993	-1.52036	0.118432952676892	-12.8373	1.01370031654573e-37	1.59271766752615e-36	35.7978612024176	down-regulated
PML	2240.48997496126	-1.27479	0.0993092981532157	-12.8365	1.02343232444508e-37	1.60698430969555e-36	35.7939883635888	down-regulated
HSPA1B	7880.96497045258	-1.10443	0.0860698522711269	-12.8318	1.08804902148874e-37	1.70410320697207e-36	35.7685041062471	down-regulated
SOCS1	177.25963615628	-3.6336	0.283358234814781	-12.8234	1.21337194340319e-37	1.89917746976352e-36	35.7214344504616	down-regulated
H3C2	197.578490121711	-3.10294	0.242042080072853	-12.8198	1.26990960076894e-37	1.986409357751e-36	35.7019312475362	down-regulated
SLC6A12	150.034395690287	-4.56259	0.356555238180058	-12.7963	1.7194314766377e-37	2.67935681176186e-36	35.5719694472501	down-regulated
TXNDC16	442.583439485788	-1.92906	0.150879306181025	-12.7855	1.97634641452453e-37	3.07775690529745e-36	35.5117656856277	down-regulated
CRACR2B	1192.51665195014	-1.3641	0.106737150080612	-12.78	2.12122765035527e-37	3.29505381452793e-36	35.4821374881529	down-regulated
KREMEN2	525.332299413792	-2.04745	0.160325062936316	-12.7706	2.39209981492234e-37	3.71114189033767e-36	35.4304924406896	down-regulated
DNAAF1	187.297410228048	-3.47714	0.272817776407473	-12.7453	3.31258753211249e-37	5.1102570614291e-36	35.2915572529862	down-regulated
ANKRA2	1880.72669598056	-1.33401	0.104704534090122	-12.7407	3.51276116173234e-37	5.4122867599391e-36	35.2666192011801	down-regulated
LINC00431	160.874861291551	-3.69658	0.290719572338654	-12.7153	4.86297578620573e-37	7.46928841629556e-36	35.1267207705536	down-regulated
IFITM10	151.161008229941	-4.47913	0.352361170348823	-12.7118	5.08827711856859e-37	7.80075917456175e-36	35.1078631294532	down-regulated
TRIM55	136.312155298431	-5.28139	0.415579339044221	-12.7085	5.30418211523512e-37	8.12670587351001e-36	35.0900854582025	down-regulated
SDE2	2527.12609254746	-1.11955	0.0882718491936138	-12.683	7.34322180076943e-37	1.11951208307092e-35	34.9509712146506	down-regulated
CLBA1	2583.71119363398	-1.12022	0.0884660928253002	-12.6627	9.51963892352874e-37	1.44506243068245e-35	34.8401133897827	down-regulated
CLIC3	466.635336653266	-2.01664	0.159280462357306	-12.6609	9.73160960602319e-37	1.47633009235498e-35	34.8308165278379	down-regulated
HP	183.311691955535	-6.77604	0.535261100891622	-12.6593	9.93580877274219e-37	1.50638104468413e-35	34.8220651578353	down-regulated
CHRNE	186.437435003089	-3.84758	0.304025328168175	-12.6554	1.04383504072634e-36	1.58062785159617e-35	34.8011703698041	down-regulated
ANKRD26P1	250.839440425081	-7.86645	0.621793828116651	-12.6512	1.10143673026667e-36	1.66580480211865e-35	34.7783758902818	down-regulated
AOC4P	219.763758123598	-7.46458	0.590352125873906	-12.6443	1.20323799742107e-36	1.81642517528623e-35	34.7407824874955	down-regulated
TTC21A	554.566211628437	-1.75241	0.138793939557501	-12.626	1.51841670672876e-36	2.27827198139241e-35	34.6423944308421	down-regulated
DHDH	195.262762073262	-3.11754	0.247089546292285	-12.617	1.70119279211743e-36	2.54941062074644e-35	34.593560209269	down-regulated
PXDC1	1677.87029601791	-1.31208	0.104010009313603	-12.6149	1.74769414510785e-36	2.61274445513637e-35	34.5829030652636	down-regulated
GPATCH2L	3378.62839273514	-1.1164	0.0885073998887338	-12.6136	1.77730569266406e-36	2.65540242033662e-35	34.5758696532311	down-regulated
ICAM5	241.203080660149	-2.81989	0.223695425093545	-12.6059	1.95856685323325e-36	2.91914087460133e-35	34.5347449459213	down-regulated
GPR19	338.499426060044	-2.46957	0.196110636094781	-12.5928	2.31445433113399e-36	3.44748810701603e-35	34.4624972233584	down-regulated
SLC6A3	137.107842733639	-5.52948	0.439408997196995	-12.5839	2.58940079623466e-36	3.85005479063793e-35	34.4145330899454	down-regulated
RCOR2	374.737705369849	-2.07977	0.165322383157407	-12.5801	2.71625913892518e-36	4.0338084513725e-35	34.3942847284552	down-regulated
DUOX2	148.026704856963	-5.44838	0.433175930688719	-12.5778	2.7986064207827e-36	4.15359695876792e-35	34.3815756472027	down-regulated
EPN3	327.60299128111	-3.17228	0.252376529381344	-12.5696	3.1016989514742e-36	4.59513337062328e-35	34.3377018789927	down-regulated
TMEM151A	431.516988887321	-2.38096	0.18943570918763	-12.5687	3.13943291643864e-36	4.64545619784186e-35	34.3329716305451	down-regulated
CBL	3375.61964409363	-1.01158	0.0805288024159939	-12.5618	3.42646565201339e-36	5.06410259313154e-35	34.2954975045745	down-regulated
ZNF423	146.261626758236	-4.06543	0.324016235459808	-12.547	4.12896219223514e-36	6.09139293614487e-35	34.2152833846563	down-regulated
SSTR5	176.09986100205	-3.87483	0.309023923410106	-12.5389	4.57105736395309e-36	6.72750484395054e-35	34.1721459808626	down-regulated
HTR7P1	548.631709634107	-2.19476	0.17510463382846	-12.534	4.86378320844828e-36	7.14979031930036e-35	34.1457066944935	down-regulated
IRF7	686.054	-2.32391	0.185431087809218	-12.5325	4.95919039230776e-36	7.28135566117755e-35	34.1377877551159	down-regulated
LFNG	1801.4385283502	-1.07159	0.0855571567564665	-12.5249	5.45814644556752e-36	7.99965672866412e-35	34.0969286485137	down-regulated
FAM89B	4105.49429708001	-1.05202	0.0839981483403447	-12.5243	5.49509178640212e-36	8.04901976936334e-35	34.0942570059275	down-regulated
EPCAM	1079.25805636167	-1.47791	0.118020715119592	-12.5225	5.62505105917707e-36	8.23448685931313e-35	34.0843634591672	down-regulated
CENPQ	1032.51911876524	-1.42314	0.113681143731192	-12.5187	5.89654565262963e-36	8.6216870360988e-35	34.0644077459175	down-regulated
SYNJ1	1104.93903716614	-1.42631	0.114019470113691	-12.5093	6.63778796160324e-36	9.68252951653509e-35	34.0140111704226	down-regulated
SLC44A2	2225.55995156717	-1.08759	0.0870842419188429	-12.4889	8.58211446287221e-36	1.24670763546686e-34	33.9042353806757	down-regulated
IL11	1741.98481054336	-1.0464	0.0838332522091542	-12.4819	9.37525500997214e-36	1.35872302472565e-34	33.866869065043	down-regulated
SYT5	165.505358173475	-3.54038	0.283642935555574	-12.4818	9.38277220834561e-36	1.35901351633452e-34	33.8667762238854	down-regulated
GLTP	3618.57021675255	-1.0575	0.0847295677774707	-12.4809	9.48602899289994e-36	1.37316257623587e-34	33.8622780412175	down-regulated
ASGR1	234.49390047959	-3.16893	0.253939784114625	-12.4791	9.71106240105763e-36	1.40491261919526e-34	33.8523506865642	down-regulated
OTULINL	429.340190954525	-2.31844	0.185913761134382	-12.4705	1.08114592784613e-35	1.56227487768246e-34	33.8062425508953	down-regulated
PPP1R2	1979.29678611095	-1.07535	0.086407856553247	-12.445	1.48853006270648e-35	2.14592064946434e-34	33.6683863411478	down-regulated
HRNR	608.762066192813	-2.13531	0.171758420660468	-12.4321	1.75070754029298e-35	2.5165272468398e-34	33.5991983630661	down-regulated
MYH7B	324.410491737427	-3.10861	0.250184092066705	-12.4253	1.90530461168837e-35	2.73237750362663e-34	33.5634592989817	down-regulated
PARP10	834.317755382652	-1.54757	0.124654485939788	-12.4149	2.17019410534583e-35	3.10322651305019e-34	33.5081865229084	down-regulated
PDGFB	639.272382407902	-1.76514	0.142245915020553	-12.4091	2.33372971541767e-35	3.33465553469584e-34	33.4769490214498	down-regulated
HEATR4	173.552454313202	-3.35835	0.270697136769694	-12.4063	2.41517368276863e-35	3.44553597382015e-34	33.4627432113856	down-regulated
LRIF1	2158.60829787346	-1.37398	0.110838480227002	-12.3963	2.73769885759783e-35	3.89214257425038e-34	33.4098112593399	down-regulated
NCF1C	168.340919085036	-5.93999	0.479822588685331	-12.3796	3.37191432364944e-35	4.78276363098998e-34	33.3203210818697	down-regulated
HOXC13	2002.53696491005	-1.30481	0.105481848994753	-12.37	3.79686974992142e-35	5.37007648164445e-34	33.2700195289523	down-regulated
TENT5C	198.464903038624	-3.12149	0.253117848034912	-12.3321	6.08054244738576e-35	8.56068146276149e-34	33.0674916624564	down-regulated
TRIM54	143.842042990771	-5.18914	0.421058686470264	-12.324	6.72563318741613e-35	9.45808952288547e-34	33.0241965796089	down-regulated
H3C12	149.748857111072	-4.22183	0.342692080726977	-12.3196	7.10337729203232e-35	9.97223559243626e-34	33.0012074699109	down-regulated
ARG2	476.402825218264	-1.92796	0.156574605466486	-12.3133	7.67826964005491e-35	1.07609268429013e-33	32.9681503211025	down-regulated
NXPH3	127.977989817465	-4.97175	0.404016411657949	-12.3058	8.42960273727503e-35	1.18071912885968e-33	32.9278534006877	down-regulated
ZNF585B	1051.71378448728	-1.35832	0.110407060495382	-12.3029	8.74066899171799e-35	1.22359438945958e-33	32.9123625230508	down-regulated
KCNQ4	217.835295905634	-2.92214	0.237832107928505	-12.2866	1.06960427875588e-34	1.49308520271178e-33	32.8259	down-regulated
GLS2	127.20390124912	-4.73793	0.385784830348457	-12.2813	1.14183833895105e-34	1.58941833607122e-33	32.7987617811212	down-regulated
SAXO2	264.175235581542	-2.49878	0.203599304323421	-12.273	1.2643074713976e-34	1.75592719914894e-33	32.7554934939329	down-regulated
HIC2	975.834399455781	-1.41579	0.115384486710509	-12.2702	1.30958504256928e-34	1.8167636730117e-33	32.7407015626106	down-regulated
NOCT	982.015076132918	-1.40813	0.114793990440272	-12.2666	1.36873263941334e-34	1.89668336294646e-33	32.7220051652647	down-regulated
CFD	1811.3045739558	-1.0834	0.0884092782330831	-12.2543	1.59240355246389e-34	2.20291427471043e-33	32.6570024028695	down-regulated
SP2	3084.16239209978	-1.00585	0.0821168677196676	-12.249	1.70170291223803e-34	2.35279754304498e-33	32.6284154420213	down-regulated
REM2	178.565654258928	-3.18289	0.259941059294456	-12.2447	1.79434419835947e-34	2.47810493994161e-33	32.6058803065667	down-regulated
SLCO2B1	241.937937435479	-2.89559	0.236545777799901	-12.2411	1.87382244401974e-34	2.58352745469657e-33	32.5877869189219	down-regulated
OTOF	142.165881255605	-4.63088	0.378361490724736	-12.2393	1.91688862055101e-34	2.64142751670338e-33	32.5781613022694	down-regulated
ENSG00000279086	144.420664722397	-4.05529	0.331654723963072	-12.2274	2.21843266063693e-34	3.05012838538882e-33	32.5156818800327	down-regulated
SLC8A2	168.450446017796	-3.73782	0.306084467732188	-12.2117	2.69089792409404e-34	3.69148667917452e-33	32.4327986944016	down-regulated
KCTD11	1365.35090681404	-1.46846	0.120411800155457	-12.1953	3.29216175368192e-34	4.5087984195426e-33	32.3459391808028	down-regulated
MPP2	1088.42951457196	-1.20537	0.0989646451872131	-12.1798	3.98041667938344e-34	5.43329080731786e-33	32.2649370494972	down-regulated
MIB2	2998.41216741222	-1.26542	0.103996228271862	-12.1679	4.6067815992712e-34	6.2813263266169e-33	32.2019486436016	down-regulated
PSG1	152.161940875447	-3.7648	0.309593249587363	-12.1605	5.04671153492111e-34	6.87356534579421e-33	32.1628179342138	down-regulated
SMIM24	180.828853203246	-6.74654	0.555219890620379	-12.1511	5.65892930309061e-34	7.69889211808994e-33	32.1135717659467	down-regulated
LNX2	1293.13161352582	-1.17533	0.0968418451770807	-12.1366	6.7543737840875e-34	9.18416009516409e-33	32.036960554406	down-regulated
ARHGAP30	284.252997798357	-3.97451	0.327484297162734	-12.1365	6.7665099653062e-34	9.19559005869506e-33	32.036420397909	down-regulated
ANKRD65	162.876231632074	-6.8106	0.561629578888015	-12.1265	7.64412371161815e-34	1.03653981154461e-32	31.9844140128156	down-regulated
RAB37	381.474896559891	-2.07483	0.171299546031116	-12.1123	9.09488941906458e-34	1.23190776900429e-32	31.9094218058988	down-regulated
C17orf107	173.154658536294	-3.46838	0.28659046692753	-12.1022	1.02793808277294e-33	1.3908194081514e-32	31.856729257596	down-regulated
LRRC4B	245.154674295661	-2.61001	0.215672438223666	-12.1017	1.03395721066907e-33	1.39819600424651e-32	31.8544319433286	down-regulated
P2RY11	440.621606220259	-2.26371	0.187078685901119	-12.1003	1.05216470613711e-33	1.42203751840417e-32	31.847088945223	down-regulated
USP20	1705.82430139268	-1.12646	0.0932068119183406	-12.0856	1.25902729520828e-33	1.69789610948985e-32	31.7700888867986	down-regulated
HCAR2	178.653080381478	-3.52792	0.292270390998616	-12.0708	1.50744476111771e-33	2.02957554620829e-32	31.6925947784483	down-regulated
ZC3H12D	154.896257818598	-4.71419	0.390564733539995	-12.0702	1.51764178314615e-33	2.04218915055234e-32	31.6899040353947	down-regulated
ENSG00000240882	128.367643849002	-5.6244	0.466003114010317	-12.0695	1.53140874797323e-33	2.05959020485739e-32	31.6862191822879	down-regulated
GRM4	213.891594412641	-7.65078	0.634524701120045	-12.0575	1.77087859678362e-33	2.37646702057211e-32	31.6240682082503	down-regulated
TNXA	129.599908694086	-5.16468	0.428543000746712	-12.0517	1.89928214244594e-33	2.54739409007493e-32	31.5939038630829	down-regulated
LGALS7	142.887303358272	-5.9166	0.491188972572798	-12.0455	2.04921068139896e-33	2.74400552514108e-32	31.5616150184989	down-regulated
TRABD2A	686.222614082658	-1.91732	0.159243376842163	-12.0402	2.18382250896808e-33	2.92267060212167e-32	31.5342201287897	down-regulated
TAC3	139.98756439308	-6.11314	0.507776640477212	-12.039	2.21555468500867e-33	2.96352979353411e-32	31.5281907022693	down-regulated
NUTM2E	470.991344942564	-2.25012	0.187048119328695	-12.0296	2.48298675286431e-33	3.31405465249653e-32	31.4796403338521	down-regulated
AMZ1	125.819633662664	-5.43929	0.452415106993728	-12.0228	2.69748897050546e-33	3.59257148032959e-32	31.4445945820792	down-regulated
FIBCD1	626.979836355148	-1.6712	0.13930582092132	-11.9966	3.70032284703651e-33	4.92019195389126e-32	31.3080179535559	down-regulated
TPI1P2	297.737463507573	-2.51577	0.209959852819735	-11.9822	4.40677423699355e-33	5.85006992409074e-32	31.2328389428981	down-regulated
NCAN	153.581512911949	-4.80421	0.400974823260889	-11.9813	4.45120729224557e-33	5.90587525126145e-32	31.2287157307981	down-regulated
MOSPD1	1426.92482190873	-1.60384	0.133874747608687	-11.9801	4.51567805460745e-33	5.98819232932667e-32	31.2227042593938	down-regulated
BIK	225.905218818914	-2.68669	0.224293566134913	-11.9784	4.60921650109507e-33	6.10894651532234e-32	31.214	down-regulated
DIO3	179.650907721053	-2.91498	0.243669162467561	-11.9629	5.56088336333437e-33	7.35839488314111e-32	31.1332169097683	down-regulated
PCDH19	159.743696757346	-6.74717	0.564019525520943	-11.9626	5.57550739104232e-33	7.3737879937755e-32	31.1323093530951	down-regulated
IL17RE	206.653526570567	-2.93182	0.245360355667493	-11.949	6.56866154605581e-33	8.67795522150953e-32	31.0615825951726	down-regulated
WAS	156.641661521793	-3.55522	0.29774740001986	-11.9404	7.28692572777549e-33	9.60627235514018e-32	31.017445104491	down-regulated
MYT1	145.653486290708	-4.26305	0.357248169868676	-11.933	7.96403649885209e-33	1.04876831073559e-31	30.9793204436297	down-regulated
R3HCC1L	2211.17539180402	-1.03933	0.0871546425280185	-11.9251	8.75434370689914e-33	1.14977134290079e-31	30.9393885199857	down-regulated
CFP	167.170531801789	-3.52041	0.295335358724568	-11.9201	9.30466940155276e-33	1.22139888225282e-31	30.9131424817789	down-regulated
ADRA2A	243.264997922301	-8.0968	0.679637790424201	-11.9134	1.00769192844581e-32	1.32136284149182e-31	30.8789779103035	down-regulated
KLF9	415.915028748399	-2.08385	0.174965466299533	-11.9101	1.0490921679965e-32	1.3741881044341e-31	30.8619538152195	down-regulated
CAPN8	216.662364493008	-2.6597	0.223471286671723	-11.9017	1.15897601133765e-32	1.51651149848703e-31	30.8191542924351	down-regulated
KLHDC7A	1481.16645898459	-1.24291	0.104435230473569	-11.9013	1.16531230403235e-32	1.52399357660506e-31	30.817016863476	down-regulated
ISM2	148.903687667426	-3.83706	0.32297806109233	-11.8802	1.49926839187501e-32	1.95348649030141e-31	30.7091895878729	down-regulated
SAMD14	225.739963303906	-2.61221	0.220080662148647	-11.8693	1.70867685636889e-32	2.22281276322986e-31	30.653097118192	down-regulated
ELOVL4	292.643180653155	-2.15534	0.181598953880465	-11.8687	1.72182432633682e-32	2.23873487831515e-31	30.6499973346042	down-regulated
SLC4A5	232.35577433929	-3.03431	0.256119578307215	-11.8472	2.22410326953465e-32	2.88268106206983e-31	30.5402034050087	down-regulated
HTRA3	389.094103599659	-2.48164	0.209534382737079	-11.8436	2.32321478896297e-32	3.00797746730646e-31	30.5217254213587	down-regulated
ZNF280A	286.119994966085	-2.27816	0.192366065512963	-11.8428	2.34385807387043e-32	3.03311229590834e-31	30.5181115103651	down-regulated
SCN4B	156.538610940566	-6.76455	0.571206112172044	-11.8426	2.35118546165293e-32	3.04099811126275e-31	30.5169838495923	down-regulated
FOXN4	124.102209662598	-4.77866	0.403943093384883	-11.83	2.73006499704429e-32	3.52918522848116e-31	30.4523255471951	down-regulated
FAM153A	229.702753327424	-7.97702	0.674318243627445	-11.8298	2.73916124384501e-32	3.53908820667019e-31	30.4511086130639	down-regulated
GAL3ST4	145.695059497101	-3.71716	0.314473700628213	-11.8203	3.06748514255956e-32	3.95707188562943e-31	30.4026260601083	down-regulated
HSPA1A	9935.36968123198	-1.06268	0.0900192479113766	-11.805	3.67599129373454e-32	4.7321429437673e-31	30.3249421451194	down-regulated
FGD5	119.792841355845	-4.97455	0.421582333009262	-11.7997	3.91601780712028e-32	5.03062381350334e-31	30.2983781576947	down-regulated
DGAT1	1908.52156862285	-1.37338	0.116500227772771	-11.7887	4.46595314538625e-32	5.73409775729489e-31	30.2415349072926	down-regulated
FAM126B	720.004734585635	-1.35068	0.114600243100272	-11.7861	4.60636798764565e-32	5.91130575905469e-31	30.2283165764258	down-regulated
FLJ30679	135.498985107803	-4.46156	0.378679814680122	-11.7819	4.84071864788525e-32	6.20881353317728e-31	30.2069913829513	down-regulated
DRP2	597.023044616479	-1.67393	0.142630314167687	-11.7361	8.32175338032409e-32	1.06074386934721e-30	29.9743894695933	down-regulated
PER1	1907.4431515114	-1.1525	0.0982247543834038	-11.7333	8.59944656774811e-32	1.09500804126098e-30	29.9605826915431	down-regulated
CYP27A1	145.975676649673	-4.4871	0.382552368414773	-11.7294	9.01088689885126e-32	1.14621457084872e-30	29.9407340750277	down-regulated
H2BC4	336.260423519476	-2.86755	0.244954443217139	-11.7065	1.18101638899864e-31	1.49688514249843e-30	29.8248115222307	down-regulated
PRX	834.245176629355	-1.58253	0.135202926083752	-11.7049	1.20346813588551e-31	1.52455788724819e-30	29.8168560808852	down-regulated
SYNE3	186.729585945617	-2.83487	0.242658689677659	-11.6825	1.56544261139782e-31	1.97498931710231e-30	29.7044352491697	down-regulated
TRAPPC2B	402.039946919623	-2.08095	0.178142948678751	-11.6814	1.58746550994268e-31	2.00174934788271e-30	29.6985903043025	down-regulated
GDF9	224.327348275272	-3.05973	0.262122597207829	-11.6729	1.75361433919553e-31	2.20674327155938e-30	29.6562481889183	down-regulated
MYH16	178.403043020765	-3.67673	0.315764089089084	-11.6439	2.46454700785961e-31	3.08406156536828e-30	29.5108769609606	down-regulated
SLC18A2	231.519192979779	-2.72176	0.233770883208764	-11.6429	2.49474736920472e-31	3.1202695152529e-30	29.5058078919008	down-regulated
TRIM36	354.695133083881	-2.37944	0.204371147958079	-11.6428	2.49809758584262e-31	3.1228753390564e-30	29.5054453518699	down-regulated
ATP6V1FNB	199.427476400191	-3.69786	0.318233108348781	-11.62	3.26279458765754e-31	4.06029339600876e-30	29.3914425832544	down-regulated
CAPN5	2060.88669625471	-1.04432	0.0899811150520768	-11.606	3.84173481778752e-31	4.77351041976301e-30	29.3211621251069	down-regulated
CEL	311.208828802731	-2.37615	0.205034318934834	-11.589	4.68409542212791e-31	5.80262916313052e-30	29.2363751836234	down-regulated
ELOVL3	273.270704920138	-3.25731	0.281613094376026	-11.5666	6.08283044200728e-31	7.50520200482299e-30	29.1246376140937	down-regulated
SPATA18	891.595984519359	-1.49066	0.128988378805714	-11.5565	6.84271191423738e-31	8.42590080468431e-30	29.0743836579829	down-regulated
ENSG00000272896	134.506075013842	-4.04025	0.34961172302292	-11.5564	6.85319893090872e-31	8.43460110058721e-30	29.073935451772	down-regulated
CD27	142.87689229952	-3.41167	0.295369465649133	-11.5505	7.33824914426392e-31	9.02707175171627e-30	29.0444531055351	down-regulated
LYNX1	973.295239166375	-1.48972	0.129010895345157	-11.5473	7.62060067653123e-31	9.36505722222571e-30	29.0284895646613	down-regulated
MYCL	275.126097919131	-2.3025	0.199541735460318	-11.5389	8.39557351207024e-31	1.02968994139082e-29	28.9872935296781	down-regulated
VCPIP1	2257.55725681346	-1.03915	0.0901039304393894	-11.5328	9.01968308858475e-31	1.10568487071005e-29	28.9563686328982	down-regulated
FNDC1	129.228236188703	-5.9513	0.516291087040098	-11.527	9.64234389877085e-31	1.1808398499379e-29	28.927808999088	down-regulated
ZFP36	2326.24	-1.23912	0.107568099402843	-11.5194	1.05331971688072e-30	1.28737916016576e-29	28.8902935254216	down-regulated
DYSF	176.847640344187	-3.16943	0.275173437075283	-11.5179	1.07153296401133e-30	1.30899061589728e-29	28.8830634668783	down-regulated
ARID4B	2939.24606198238	-1.06669	0.0926520093391583	-11.5129	1.13584003166416e-30	1.38686124123749e-29	28.857966988948	down-regulated
EXOC3L2	345.768147451267	-1.98571	0.172564340554637	-11.5071	1.21542291162667e-30	1.48036589018877e-29	28.8296309302464	down-regulated
TMEM86A	133.128033680358	-3.59977	0.312949869964532	-11.5027	1.27866685973205e-30	1.55585860938373e-29	28.8080298726127	down-regulated
PLEKHD1	123.571878739174	-4.8582	0.422407386546508	-11.5012	1.30062382456125e-30	1.58101472007317e-29	28.8010640865404	down-regulated
MYH11	156.202097359461	-3.46534	0.301510957235228	-11.4933	1.42637023457739e-30	1.73130866680461e-29	28.7616254969198	down-regulated
ENSG00000287067	116.10034035652	-5.3716	0.46738464114745	-11.4929	1.43250085981751e-30	1.73703940955343e-29	28.7601903282671	down-regulated
ENSG00000234329	154.774317782173	-3.79668	0.330498870720321	-11.4877	1.52040655886655e-30	1.84091662520522e-29	28.7349658801724	down-regulated
PPM1E	220.622778029188	-3.54157	0.308875795187527	-11.466	1.9552275237033e-30	2.36044411921321e-29	28.627006276531	down-regulated
GOLGA6A	166.324786396962	-7.23634	0.631417783198412	-11.4605	2.08381016558102e-30	2.51198475314931e-29	28.5999830009393	down-regulated
CBARP	482.753237204405	-1.79561	0.156681811505195	-11.4602	2.08977889885381e-30	2.51794865173725e-29	28.5989531306597	down-regulated
TFCP2L1	1188.2754292955	-1.32756	0.115883194941058	-11.456	2.19338577782697e-30	2.64020245092727e-29	28.578362770119	down-regulated
TAMALIN	156.550055639271	-3.57357	0.312096939734316	-11.4502	2.34606130568333e-30	2.81847482006361e-29	28.5499858407644	down-regulated
TEK	117.891006218437	-5.45372	0.476730080603613	-11.4398	2.64366552236328e-30	3.17291345945957e-29	28.4985417730278	down-regulated
BLOC1S2	3192.93551359973	-1.1632	0.101690652814078	-11.4386	2.6817953337717e-30	3.21711039261022e-29	28.4925340363691	down-regulated
SLC6A13	166.073807742711	-3.96653	0.347340733454621	-11.4197	3.33343307190911e-30	3.98911612081084e-29	28.3991233214507	down-regulated
PLCL1	122.962355591733	-5.08269	0.445558465346839	-11.4075	3.83806428143686e-30	4.58855289359754e-29	28.3383242576907	down-regulated
ALDH8A1	164.271503658469	-3.39766	0.29804966950999	-11.3996	4.19881914273275e-30	5.01255639257374e-29	28.2999407284175	down-regulated
DNAH6	142.703690732431	-3.88732	0.341034813486225	-11.3986	4.24933317186134e-30	5.0704047121358e-29	28.2949573745458	down-regulated
FNIP1	1740.37930057283	-1.02371	0.0898633595426393	-11.3919	4.59091953011632e-30	5.46740812832983e-29	28.2622185059025	down-regulated
RTN4RL1	156.066710675109	-3.77729	0.331902062762923	-11.3807	5.21613915323793e-30	6.2030034927941e-29	28.2073979742919	down-regulated
RNVU1-15	114.275947005824	-5.46011	0.480878140835789	-11.3545	7.04703490532859e-30	8.34006262535575e-29	28.0788306882418	down-regulated
GPR132	148.353790739493	-3.77727	0.332992432899482	-11.3434	7.99563815363023e-30	9.44006090820366e-29	28.0250252035821	down-regulated
MGAM2	192.012212921434	-7.46061	0.657859104537769	-11.3407	8.24461693580665e-30	9.71540615207962e-29	28.0125390390251	down-regulated
FCHO2	2095.80912736375	-1.04745	0.0923665332913398	-11.3401	8.30245296129242e-30	9.77888535125565e-29	28.0097106455587	down-regulated
SP4	888.754185224321	-1.26083	0.111201891507652	-11.3382	8.48314679077313e-30	9.9821734933718e-29	28.0007748862271	down-regulated
ARID3C	161.787977346863	-2.97093	0.262282790515129	-11.3272	9.62205105525269e-30	1.12846242918216e-28	27.9475128956651	down-regulated
LNP1	343.351559648379	-1.98886	0.175656389639137	-11.3224	1.01598274498056e-29	1.19096560291301e-28	27.9241007814902	down-regulated
SLC2A5	160.407858276228	-7.20085	0.637170856306742	-11.3013	1.29320188017336e-29	1.51233457068471e-28	27.8203521201255	down-regulated
GJC2	125.240278972668	-4.42833	0.3918735120887	-11.3004	1.30602807978417e-29	1.52660996789186e-28	27.8163	down-regulated
SCN3B	203.708052822735	-3.32741	0.294608182588119	-11.2944	1.39901428305935e-29	1.63297822471492e-28	27.7870196064141	down-regulated
CCDC187	127.627671967929	-4.87925	0.432189410477833	-11.2896	1.47700430527357e-29	1.72237985494815e-28	27.7638710626876	down-regulated
BCL2L11	1584.78357745679	-1.09583	0.0971206080775153	-11.2832	1.58882401439798e-29	1.84927712950609e-28	27.7329980013359	down-regulated
TBX4	170.060794501676	-4.00307	0.354787446222011	-11.283	1.59188790138277e-29	1.85196887894705e-28	27.7323663156104	down-regulated
UBTD1	1208.93537151246	-1.14065	0.101265421665938	-11.264	1.97579482668485e-29	2.29102982443249e-28	27.639969257165	down-regulated
NEK10	283.918134186147	-2.25786	0.200533767351695	-11.2593	2.0847996283237e-29	2.41401974811817e-28	27.6172591814368	down-regulated
MORN1	1259.2849534775	-1.26262	0.112144745360504	-11.2589	2.09459287891301e-29	2.42422082868373e-28	27.6154278216714	down-regulated
SLC17A8	137.970650913257	-6.57659	0.584465105716554	-11.2523	2.25565780293527e-29	2.60573927638051e-28	27.5840690408467	down-regulated
COLGALT2	125.478684068153	-3.81428	0.339234287974084	-11.2438	2.48479340686991e-29	2.867749394483e-28	27.5424588032652	down-regulated
RAB7B	162.205877178807	-3.63397	0.323449102914397	-11.235	2.74345654629638e-29	3.1603593822102e-28	27.5002635285094	down-regulated
CDKN1C	174.33842039878	-3.04297	0.270935565056666	-11.2313	2.86088882534852e-29	3.29102339349005e-28	27.4826690306113	down-regulated
PDGFRB	139.131094933377	-3.61763	0.322164589834549	-11.2291	2.93313402913006e-29	3.37255690700159e-28	27.4720407135054	down-regulated
RASSF5	585.707966785635	-1.59438	0.142236856932563	-11.2093	3.67026356566839e-29	4.2024773535001e-28	27.3764946182279	down-regulated
NODAL	135.840027384508	-4.0521	0.361500082905703	-11.2091	3.67842938965593e-29	4.20945558464864e-28	27.3757740685044	down-regulated
SSTR2	183.727342766545	-3.37493	0.301462429723064	-11.1952	4.30540286745748e-29	4.91601628015571e-28	27.3083866875492	down-regulated
ENSG00000279108	216.993021136481	-2.79736	0.250015366186546	-11.1887	4.62968767351401e-29	5.28384539479016e-28	27.2770498983194	down-regulated
LONRF3	1296.09001399117	-1.11272	0.0994655038825235	-11.187	4.72261051351085e-29	5.37993504524351e-28	27.2692229677653	down-regulated
IFIT2	358.295480053972	-2.14298	0.191836800658173	-11.1709	5.66304609830718e-29	6.42750517566614e-28	27.1919575649749	down-regulated
TECTA	125.081	-3.60805	0.323093925559629	-11.1672	5.90202072321613e-29	6.69565645967437e-28	27.1742068371975	down-regulated
C2CD2L	1746.39073442827	-1.15135	0.103245432068244	-11.1515	7.0371493619065e-29	7.96144130654975e-28	27.0990083022601	down-regulated
CACNA1I	144.105368259472	-3.52943	0.316855511807052	-11.1389	8.10968027574031e-29	9.16222906313245e-28	27.0379988547111	down-regulated
IL2RB	111.369269913538	-4.3039	0.38663674313766	-11.1316	8.8009207765217e-29	9.92499080433729e-28	27.0032698869454	down-regulated
EXOC8	2133.9323103251	-1.00333	0.0902516330561526	-11.117	1.03710873482541e-28	1.16850112115704e-27	26.9323708665734	down-regulated
EVI5L	1047.94366060106	-1.28685	0.115757820444364	-11.1167	1.04038241377623e-28	1.17165405502109e-27	26.9312006000701	down-regulated
KLHL26	1014.62774026654	-1.24615	0.112103831875934	-11.1161	1.04803738261034e-28	1.17973596146621e-27	26.9282151819393	down-regulated
CRLF1	400.63035190764	-1.75722	0.158244312899287	-11.1045	1.19339732959232e-28	1.34274901730306e-27	26.8720051567927	down-regulated
CCM2L	380.921764612767	-9.47137	0.85302094887656	-11.1033	1.2085808206565e-28	1.35921233534781e-27	26.8667126927403	down-regulated
DNAI4	372.42050435277	-2.50915	0.226120220284482	-11.0965	1.30391705286223e-28	1.46442656889111e-27	26.8343324003736	down-regulated
MED26	1017.81240485295	-1.12149	0.101107299927646	-11.0921	1.37000637271589e-28	1.53585252843074e-27	26.8136504829787	down-regulated
DIPK2A	1533.75694651667	-1.19498	0.10793802455369	-11.071	1.7341479835901e-28	1.94054544219079e-27	26.7120761828329	down-regulated
ALPK3	405.846365215755	-1.66147	0.150126350232829	-11.0671	1.81143402843382e-28	2.02519145890933e-27	26.6935339128852	down-regulated
LPXN	671.919169005106	-1.89123	0.171014293083272	-11.0589	1.98496697410917e-28	2.21719102155593e-27	26.6541968887376	down-regulated
GPR87	101.933593222818	-4.85096	0.438986792606657	-11.0504	2.1832481487356e-28	2.43646144692757e-27	26.613240456238	down-regulated
ENSG00000268643	130.127898697245	-6.19199	0.560947952995836	-11.0384	2.49340776381728e-28	2.77881953859058e-27	26.5561396561514	down-regulated
GBX2	265.879500498431	-2.34215	0.212255520045755	-11.0346	2.60335948878713e-28	2.90004600621691e-27	26.5375951124156	down-regulated
FCGRT	3245.33907396734	-1.03156	0.0935519193058618	-11.0266	2.84303313313971e-28	3.16274606489892e-27	26.499935675944	down-regulated
COLQ	516.599413598742	-1.56915	0.142315161607268	-11.0259	2.86592106002007e-28	3.18676977770026e-27	26.4966493101961	down-regulated
PARD6B	806.994541943755	-1.25043	0.113428225548319	-11.024	2.92719817948724e-28	3.25050853696934e-27	26.4880486890142	down-regulated
ZNF350	436.862929699283	-1.70898	0.155199422625492	-11.0115	3.36233300341113e-28	3.72196826224029e-27	26.4292273344811	down-regulated
NCF1B	128.254661217177	-6.65861	0.604988541878487	-11.0062	3.56812134668445e-28	3.94091968810328e-27	26.4044024155198	down-regulated
ADAM33	103.311939178135	-4.72445	0.429295873437894	-11.0051	3.61099145282708e-28	3.98648281661859e-27	26.3994101035545	down-regulated
SLC9A5	894.277821322398	-1.17376	0.1067417772848	-10.9962	3.98473051797237e-28	4.38826347429598e-27	26.3577073049812	down-regulated
TBC1D10C	230.845649413777	-3.5775	0.325845949292971	-10.9791	4.81630355541772e-28	5.2910657418965e-27	26.2764568422923	down-regulated
ALPG	824.386063835186	-12.9859	1.18329969876099	-10.9743	5.07948148526332e-28	5.57273598463335e-27	26.253931531703	down-regulated
NPIPB6	387.481426195827	-1.81629	0.165503113253229	-10.9743	5.07729469178776e-28	5.57273598463335e-27	26.253931531703	down-regulated
RAPGEFL1	923.760621456428	-1.35293	0.123354875210312	-10.9678	5.45876332904712e-28	5.98352305858914e-27	26.2230430309989	down-regulated
PLXNA4	188.810302535364	-3.89108	0.354809177145142	-10.9667	5.52645141209025e-28	6.05502578714884e-27	26.2178840029433	down-regulated
CCNP	167.061201749597	-3.02832	0.277087363756851	-10.9291	8.36625639417229e-28	9.09770413008978e-27	26.0410681911331	down-regulated
LRRC37A11P	215.041279005868	-8.23726	0.753864238359047	-10.9267	8.58991447446168e-28	9.33679769067148e-27	26.0298020513652	down-regulated
FHAD1	191.051645747959	-3.00084	0.274948859008759	-10.9142	9.86219215714393e-28	1.06961179523938e-26	25.9707738164986	down-regulated
CORIN	210.688908582668	-8.18142	0.749719673254905	-10.9126	1.00301348111338e-27	1.08686981698492e-26	25.9638224716919	down-regulated
ZNF419	1237.41190510036	-1.05861	0.0970111111997957	-10.9123	1.00719232350556e-27	1.09091850435233e-26	25.9622076916042	down-regulated
ENSG00000288640	786.733909220849	-12.9183	1.18444992618276	-10.9066	1.07171172810164e-27	1.15978215632843e-26	25.9356235773154	down-regulated
NSG2	168.092500567587	-7.56953	0.694294617298762	-10.9025	1.12167191694541e-27	1.2117202496292e-26	25.9165976343496	down-regulated
H2BC17	170.231347709069	-2.7516	0.252581196477976	-10.8939	1.23197897429354e-27	1.32797313835962e-26	25.8768107095916	down-regulated
RASA4DP	169.751810653579	-3.20142	0.29387907026458	-10.8937	1.23546136089649e-27	1.33056327954654e-26	25.8759644662427	down-regulated
ZFPM1	1027.67691520225	-1.36913	0.125812876421887	-10.8823	1.40002126859949e-27	1.50581694212542e-26	25.822227820869	down-regulated
TSPAN18	223.209722538899	-2.38444	0.219169509306512	-10.8794	1.44459795037295e-27	1.55308454743105e-26	25.8088049013331	down-regulated
FAM200A	1196.31253011141	-1.14829	0.10565022643359	-10.8688	1.62267400977572e-27	1.74377330815131e-26	25.758509974345	down-regulated
ARVCF	634.975178902988	-1.39752	0.128606927156228	-10.8666	1.66333291986772e-27	1.78668771854375e-26	25.7479513478663	down-regulated
BFSP1	1002.1590508877	-1.32033	0.121583843854379	-10.8595	1.79814076494548e-27	1.93065183525418e-26	25.7142960378006	down-regulated
MAGEH1	1024.25326191911	-1.07289	0.0988554282516417	-10.8532	1.92654440856012e-27	2.06133562325626e-26	25.6858512913545	down-regulated
TDRD12	264.416294108597	-3.61939	0.333598447070902	-10.8495	2.00447776127582e-27	2.14193262986439e-26	25.6691941931392	down-regulated
LRRC39	173.239307259051	-3.19272	0.294300251925138	-10.8485	2.02682513000139e-27	2.16487405133424e-26	25.6645673650851	down-regulated
CSF1R	96.1355643915887	-4.93562	0.455024095193271	-10.8469	2.06210002367845e-27	2.20159765195848e-26	25.6572620466268	down-regulated
ITGA2B	482.859829366549	-1.64399	0.15160309702721	-10.8441	2.12831458888668e-27	2.27130784611405e-26	25.6437239988459	down-regulated
ZNF286A-TBC1D26	131.575863475059	-5.1346	0.473626590070287	-10.841	2.19958748426478e-27	2.34635355526159e-26	25.6296065465555	down-regulated
GTF2IP12	959.924361917438	-1.20124	0.110907710142987	-10.831	2.45571376825993e-27	2.61617354430181e-26	25.5823334503964	down-regulated
CASP10	795.509622525484	-1.27563	0.117791968166387	-10.8295	2.49576209463752e-27	2.65769015796994e-26	25.5754956518837	down-regulated
PCDH1	243.495698916032	-2.22178	0.205175685316865	-10.8287	2.51771876306176e-27	2.67991377145935e-26	25.5718791795465	down-regulated
MYBL1	1871.54201614631	-1.07823	0.0996186145438581	-10.8235	2.66279592543109e-27	2.82701314184872e-26	25.5486721726144	down-regulated
THEMIS2	182.687978021281	-3.03482	0.28095746326802	-10.8017	3.37873937496858e-27	3.57632816967477e-26	25.4465626364814	down-regulated
KRT8P12	870.180183642112	-1.15443	0.106881439551771	-10.8011	3.40254587545687e-27	3.59998115544046e-26	25.4436997725965	down-regulated
ANKRD34A	221.997392362202	-2.33945	0.216808030387394	-10.7904	3.82115033315346e-27	4.03594678718505e-26	25.3940545684471	down-regulated
RSPH10B	106.165350376168	-3.99149	0.369962273345161	-10.7889	3.88350252454962e-27	4.10004729058661e-26	25.3872111340309	down-regulated
GUCY2EP	199.539661942293	-2.54218	0.235722042519747	-10.7847	4.06696544849693e-27	4.29190206491208e-26	25.3673501965741	down-regulated
INCA1	426.182215756447	-2.00246	0.185767396557899	-10.7794	4.30656376426563e-27	4.5408644104652e-26	25.342861465874	down-regulated
MIA-RAB4B	253.039004170699	-2.58877	0.240309325243289	-10.7727	4.63390579328757e-27	4.87767060700791e-26	25.3117875312853	down-regulated
DRC1	158.263553827041	-7.47981	0.695167344147236	-10.7597	5.33302307397638e-27	5.60160565912508e-26	25.2516874678248	down-regulated
SYPL2	104.207109395847	-4.37759	0.406882084164369	-10.7589	5.38219367266143e-27	5.65084490708899e-26	25.2478866121712	down-regulated
RASIP1	188.375899915308	-2.57165	0.239303363893719	-10.7464	6.1627095774111e-27	6.46481346818461e-26	25.189444001473	down-regulated
LRRC10B	108.345267070528	-5.25817	0.489345609803475	-10.7453	6.23521057165085e-27	6.53808638929548e-26	25.1845493452811	down-regulated
HMCN1	145.891468009717	-3.09663	0.288307840547435	-10.7407	6.55479111804044e-27	6.87026830960599e-26	25.1630263017897	down-regulated
ZSCAN12P1	134.94720736284	-3.99829	0.372387884388148	-10.7369	6.82984332735304e-27	7.14640482622696e-26	25.1459123857243	down-regulated
KRT4	976.630982232888	-1.14295	0.106502833980893	-10.7317	7.22660946491835e-27	7.55272503774762e-26	25.1218963258103	down-regulated
CCL26	187.774069142001	-2.44585	0.227928741484637	-10.7308	7.29728416595048e-27	7.62256988385641e-26	25.1178985853248	down-regulated
PTPRH	722.641143880058	-1.2247	0.114217762096906	-10.7225	7.98026523293769e-27	8.32893727867824e-26	25.079410408371	down-regulated
RNF32	383.532661601513	-1.93256	0.180261233563173	-10.7209	8.12185886925524e-27	8.47313012462464e-26	25.0719561239398	down-regulated
ZNF211	1346.48223097676	-1.1765	0.10976376555328	-10.7185	8.337951180302e-27	8.69488885350275e-26	25.0607359651988	down-regulated
H3C15	176.564380042603	-3.00883	0.280763658803007	-10.7166	8.50677551134953e-27	8.86344166972902e-26	25.0523976090453	down-regulated
H3C13	105.025391239804	-4.79243	0.447486617807486	-10.7097	9.17039628510878e-27	9.55084956571616e-26	25.0199579954014	down-regulated
CCR4	666.925385417531	-12.6803	1.18405040185352	-10.7093	9.20785480338243e-27	9.58581235696722e-26	25.0183710766098	down-regulated
ZNF547	234.915025494766	-2.17153	0.202951577778641	-10.6997	1.02068059890127e-26	1.06123231227811e-25	24.9741895351405	down-regulated
AK1	2898.43348790962	-1.02717	0.096111645306475	-10.6873	1.16744570818729e-26	1.21229450708648e-25	24.9163918626241	down-regulated
MGAT3	190.48802641195	-3.64687	0.341418001906065	-10.6816	1.24180281877011e-26	1.28842268890239e-25	24.8899416359337	down-regulated
GNA15	122.828150861795	-6.60318	0.618828928302238	-10.6705	1.39942518398585e-26	1.44952225359744e-25	24.8387751128096	down-regulated
CA4	107.208601653838	-4.94277	0.463616103291439	-10.6613	1.54355389021382e-26	1.59479004616727e-25	24.7972964836368	down-regulated
HLA-E	967.608153910007	-1.44594	0.135646816683833	-10.6596	1.57300830131395e-26	1.62454129216554e-25	24.7892692453952	down-regulated
CSRP2	1186.38870843064	-1.01138	0.0949666381412314	-10.6498	1.74710983244815e-26	1.80208165646493e-25	24.7442255340292	down-regulated
PECAM1	225.889877181903	-2.22894	0.209341912512267	-10.6474	1.79356590218513e-26	1.84922570559045e-25	24.7330100781809	down-regulated
OR5BA1P	95.957770337835	-4.86944	0.457381014957213	-10.6464	1.81332614875759e-26	1.86881756769114e-25	24.7284330919931	down-regulated
TAPBPL	1083.79395771046	-1.12644	0.105895164567293	-10.6373	1.99872597094235e-26	2.05817011844907e-25	24.6865187313956	down-regulated
IQANK1	362.727997538474	-1.85012	0.174083868096891	-10.6278	2.21347088591126e-26	2.27455124132907e-25	24.6431042748922	down-regulated
FAM153B	123.925787910862	-5.21002	0.490292374768858	-10.6264	2.24710300342568e-26	2.30730781850529e-25	24.6368944622797	down-regulated
UBE2D1	2206.66787983018	-1.05361	0.0992761342467268	-10.6129	2.59492522829175e-26	2.65877376258721e-25	24.5753186155981	down-regulated
FAM86HP	394.34218487073	-1.6939	0.159704313242758	-10.6065	2.78045579443392e-26	2.84532155435388e-25	24.5458686461792	down-regulated
ZNF79	726.512765443394	-1.33458	0.126066196994909	-10.5863	3.44902863041893e-26	3.51926547173375e-25	24.4535479714255	down-regulated
CHCHD7	1414.1687873316	-1.37759	0.130271330223488	-10.5748	3.90046775674801e-26	3.97331946856826e-25	24.4008465147688	down-regulated
CBFA2T3	101.031574988524	-5.06143	0.478944502029632	-10.5679	4.1987377430628e-26	4.2630676623552e-25	24.3702777742836	down-regulated
ABCB9	1109.97695650374	-1.09942	0.104228908929824	-10.5481	5.18137142272891e-26	5.23901832415568e-25	24.2807500825473	down-regulated
PLEKHH2	697.740762257367	-1.27931	0.121283425238017	-10.5481	5.18333834683421e-26	5.23901832415568e-25	24.2807500825473	down-regulated
LMBRD2	1276.90551890668	-1.03625	0.0982732761924355	-10.5446	5.38155323375031e-26	5.43713320977101e-25	24.2646300266526	down-regulated
SLC5A10	134.40920350251	-3.14404	0.298262484044712	-10.5412	5.57867561396083e-26	5.63398243487761e-25	24.2491845113523	down-regulated
CYP3A4	100.589380534708	-5.06443	0.48062443688068	-10.5372	5.8210849886794e-26	5.87157885191999e-25	24.2312451024187	down-regulated
MDGA1	710.852226417239	-1.21821	0.115610533954843	-10.5372	5.82358075857692e-26	5.87169377752304e-25	24.231236601968	down-regulated
SRCIN1	391.693752967192	-1.74922	0.166218939953119	-10.5236	6.72554662259874e-26	6.76175266477586e-25	24.1699407191496	down-regulated
C11orf96	107.181427729786	-6.20893	0.590082067297779	-10.5221	6.83004084615073e-26	6.86121299671181e-25	24.1635990984027	down-regulated
INSM2	129.990434665437	-6.94468	0.661929111763873	-10.4916	9.44321603001256e-26	9.44010035969914e-25	24.0250233886011	down-regulated
CHRD	152.535306399931	-3.92858	0.375021625199036	-10.4756	1.11828967933259e-25	1.11431193107951e-24	23.9529932194104	down-regulated
EPHB1	96.5437711326695	-5.35505	0.511220501779502	-10.475	1.12492546611582e-25	1.12001868298413e-24	23.9507747328216	down-regulated
FRG2B	172.305246598176	-7.89375	0.754015518240362	-10.4689	1.19969064484572e-25	1.1930122540031e-24	23.9233550954591	down-regulated
GDPD3	181.405181827584	-2.59469	0.247873469081849	-10.4678	1.21435033426291e-25	1.20710340484876e-24	23.9182555250711	down-regulated
IRGM	552.991947898815	-12.4112	1.18621114324393	-10.4629	1.27888911727556e-25	1.27023265588546e-24	23.8961167263564	down-regulated
MIR3648-2	107.896335957887	-6.07155	0.581700542772184	-10.4376	1.67000944946129e-25	1.65337642361927e-24	23.7816282595019	down-regulated
EFNB1	1467.10842172037	-1.0019	0.096081619788189	-10.4276	1.85465574187261e-25	1.8325039418294e-24	23.7369550824915	down-regulated
ENSG00000213386	105.323625301261	-4.84974	0.466214182770953	-10.4024	2.4180694518748e-25	2.380600963563e-24	23.6233133949547	down-regulated
FBXO36P1	260.11538414945	-8.92226	0.85777085199658	-10.4017	2.43582664795874e-25	2.39712568963987e-24	23.6203091937987	down-regulated
RASL11A	319.865756605335	-2.16603	0.208566226578504	-10.3853	2.89170224822973e-25	2.8378281776815e-24	23.5470139033619	down-regulated
NNAT	332.718126323452	-2.63866	0.254500600661095	-10.368	3.46692360811298e-25	3.3942256071168e-24	23.469259294408	down-regulated
CHST2	195.096162955752	-2.49687	0.240888281228775	-10.3653	3.56726876884033e-25	3.4896948289465e-24	23.4572125500894	down-regulated
C2orf16	402.565626279271	-1.64585	0.158899020519943	-10.3579	3.85529941718944e-25	3.76399371218036e-24	23.424351110741	down-regulated
H3C14	176.008880426615	-3.0321	0.292957225141947	-10.35	4.18642643817164e-25	4.0824281864639e-24	23.3890814461496	down-regulated
SEZ6	269.549856984429	-8.9468	0.864596358513317	-10.3479	4.27544362071966e-25	4.16758545424994e-24	23.3801154864181	down-regulated
ZNF597	509.498646165082	-1.43605	0.138799885362924	-10.3462	4.35535632967538e-25	4.24342088375043e-24	23.3722838905937	down-regulated
COL9A3	258.901331989596	-2.5219	0.243813392828384	-10.3436	4.47593179834506e-25	4.35440689395431e-24	23.3610709911097	down-regulated
PPFIA4	319.728420047042	-2.48067	0.240085769537854	-10.3324	5.02672724800146e-25	4.87485759707837e-24	23.3120380662642	down-regulated
SH2D4B	94.3399629936751	-4.44951	0.430846102997586	-10.3274	5.29884272828715e-25	5.13269433940019e-24	23.2896545979376	down-regulated
ERFL	167.230189855453	-3.38457	0.328182961749782	-10.313	6.1521250753846e-25	5.95220515535248e-24	23.2253221083254	down-regulated
PRPH	129.817640737886	-3.00651	0.29156147133491	-10.3117	6.23564059855803e-25	6.02591187909261e-24	23.2199772235926	down-regulated
LEKR1	135.811782303079	-2.99527	0.290885326528707	-10.2971	7.26286518149743e-25	6.99938047123826e-24	23.1549403985328	down-regulated
SAMD9	854.04919652511	-1.22617	0.119132991333898	-10.2924	7.62421121781796e-25	7.34474618763768e-24	23.134023207527	down-regulated
ABCA13	163.286064456151	-7.80902	0.759092541107864	-10.2873	8.03886898575679e-25	7.74117961862798e-24	23.1111928554895	down-regulated
JPH4	164.609024807738	-7.82039	0.761517433680716	-10.2695	9.67242603149205e-25	9.28884481995878e-24	23.0320382924124	down-regulated
LINGO1	436.365753873107	-1.63565	0.159319743364798	-10.2664	9.98167770344605e-25	9.57464275273743e-24	23.0188774213707	down-regulated
LBX2	483.981975445537	-1.58887	0.15501923843979	-10.2495	1.18950191955679e-24	1.13922305054056e-23	22.9433912362939	down-regulated
DNAJB5	678.105982731916	-1.28582	0.125655405596759	-10.2329	1.41174149325397e-24	1.34840183230131e-23	22.8701806660014	down-regulated
CREB3L1	803.113835302348	-1.48846	0.145468714817072	-10.2322	1.42293859153152e-24	1.35857018429261e-23	22.8669179208356	down-regulated
ZNF841	559.365443458885	-1.51655	0.148229471461067	-10.2311	1.43876063755725e-24	1.37314468591023e-23	22.8622836994844	down-regulated
CCNK	3548.36787987324	-1.35078	0.132124494122823	-10.2235	1.55541669641796e-24	1.48275840680958e-23	22.8289296049641	down-regulated
ENSG00000280129	128.178626714551	-3.19582	0.312776529726835	-10.2176	1.6539987019769e-24	1.57551684702993e-23	22.8025769485465	down-regulated
TFEC	235.622079106877	-8.76046	0.85747028379222	-10.2166	1.67047610740171e-24	1.59059779836488e-23	22.7984396230141	down-regulated
GPR37L1	171.838632959741	-2.54326	0.249166485625543	-10.2071	1.84311402364082e-24	1.75092280966449e-23	22.7567329995909	down-regulated
ENSG00000278965	463.430041555542	-12.1533	1.19070854596047	-10.2068	1.84955246714469e-24	1.7556860770139e-23	22.755553134904	down-regulated
PABIR3	266.758027735382	-1.92782	0.188894769250472	-10.2058	1.86809858861056e-24	1.77192637192872e-23	22.7515543281202	down-regulated
DHRS7B	2388.37120518455	-1.02424	0.100365561916643	-10.2051	1.88154349972262e-24	1.78399270596777e-23	22.7486069256126	down-regulated
SMTNL2	156.890829633615	-7.74547	0.759789223172483	-10.1942	2.10384324947446e-24	1.99170291037037e-23	22.7007754420213	down-regulated
KRT5	134.510659804913	-4.11551	0.404086977896215	-10.1847	2.32045864998053e-24	2.19340286193712e-23	22.6588815942013	down-regulated
APOD	96.2989628179705	-3.87025	0.380109236825301	-10.1819	2.38768365760888e-24	2.25608192899096e-23	22.6466451331184	down-regulated
CHST6	181.494486385787	-2.36842	0.232964744742406	-10.1664	2.79953718285064e-24	2.64219719110391e-23	22.5780347734692	down-regulated
RDH12	121.592870031664	-3.13367	0.308308865022726	-10.1641	2.86890219266171e-24	2.70352358002663e-23	22.5680698381724	down-regulated
ASF1B	3254.93488791478	-1.33736	0.131694091988937	-10.1551	3.14621044775419e-24	2.96031984572658e-23	22.5286613633567	down-regulated
FRMPD1	90.3140805825026	-5.15647	0.508094984676345	-10.1486	3.36028294014141e-24	3.15812790851567e-23	22.5005702844488	down-regulated
FOSB	1190.72237723134	-6.3874	0.629844472710705	-10.1412	3.62488921806016e-24	3.40292341978748e-23	22.4681478242624	down-regulated
DCST2	300.624232401645	-2.31959	0.228854759908335	-10.1356	3.83881427730728e-24	3.59963672743168e-23	22.4437413256862	down-regulated
CNTFR	429.949713826327	-12.0459	1.18894827177575	-10.1315	4.00296708849659e-24	3.74785965308081e-23	22.4262166806001	down-regulated
MAPK8IP2	505.514389709252	-1.57798	0.155807605661928	-10.1278	4.1603023929174e-24	3.89368924032649e-23	22.409638712959	down-regulated
DNAJB13	157.347838096443	-3.59292	0.354787583678813	-10.127	4.19474553288155e-24	3.92443517558239e-23	22.4062228402638	down-regulated
TMEM87B	1970.1544631085	-1.00048	0.0988038961590901	-10.1259	4.24132749929868e-24	3.96651007256112e-23	22.4015914385284	down-regulated
PAPPA2	390.726630693044	-7.61069	0.753495070826595	-10.1005	5.49505196109699e-24	5.12538860934404e-23	22.2902732006146	down-regulated
GREP1	137.718534855237	-3.68945	0.365308995467207	-10.0995	5.55137595069372e-24	5.17596520183441e-23	22.2860086521041	down-regulated
RNF227	458.163215748376	-1.54012	0.152572864511486	-10.0943	5.8547056834633e-24	5.45259556134255e-23	22.263396714305	down-regulated
WFIKKN2	413.682574533883	-11.9908	1.18798026883162	-10.0934	5.90672088486e-24	5.49896084794444e-23	22.2597193724407	down-regulated
ENG	276.393647930419	-2.26328	0.224298282423985	-10.0905	6.08720114835518e-24	5.66056894414379e-23	22.247139915652	down-regulated
GRIP2	307.267253488459	-1.76475	0.174954605547776	-10.0869	6.31238290937037e-24	5.86554328992832e-23	22.2316917556047	down-regulated
B4GALNT3	197.690905625547	-2.35846	0.233837751438388	-10.0859	6.37990156012098e-24	5.92534520675087e-23	22.2272863428673	down-regulated
ARHGAP45	2000.56947430755	-1.02402	0.101557356535552	-10.0832	6.55689410738453e-24	6.08357371227864e-23	22.2158412254033	down-regulated
ENSG00000280649	135.752156331086	-2.87367	0.285147386306684	-10.0778	6.92390413364573e-24	6.41443384827638e-23	22.1928416693623	down-regulated
SLC13A5	100.402814825715	-5.55398	0.551633910431026	-10.0682	7.63372272388628e-24	7.06140835231687e-23	22.1511086730782	down-regulated
OVOL1	217.111494187786	-8.64266	0.858827400844462	-10.0633	8.02383663896404e-24	7.41670869230377e-23	22.129788778533	down-regulated
TMEM52	143.389095264808	-3.07469	0.305659407331488	-10.0592	8.36661013339617e-24	7.73064741411103e-23	22.1117841339469	down-regulated
PCP4L1	214.102559396772	-8.62111	0.857430477542442	-10.0546	8.76883680663019e-24	8.0962308972677e-23	22.0917171146373	down-regulated
CNGB1	119.12946260094	-3.47869	0.346349231197971	-10.0439	9.77442245821884e-24	9.01792898353334e-23	22.0448931890983	down-regulated
IRAK2	1229.36892651828	-1.14223	0.113813291517286	-10.036	1.05857462802683e-23	9.75186163307825e-23	22.0109124694505	down-regulated
TUBA4B	127.615146961151	-3.40478	0.340434715906506	-10.0013	1.50434765437609e-23	1.37965693361902e-22	21.8602288921197	down-regulated
ADAMTS17	85.6717759200137	-4.79355	0.480282116423887	-9.98071	1.85145997072854e-23	1.69170464041512e-22	21.7716754594028	down-regulated
AKAP3	148.230964756848	-3.60862	0.361574178906444	-9.98032	1.85875410485713e-23	1.69774013312108e-22	21.7701287848745	down-regulated
RFPL4AL1	389.787052238173	-11.9041	1.19299055788458	-9.97835	1.89602439860816e-23	1.73049957328724e-22	21.7618285034597	down-regulated
SNIP1	1901.38867634475	-1.05936	0.10621222295894	-9.97397	1.98141151014337e-23	1.8070942119147e-22	21.7430192051324	down-regulated
ENSG00000267669	247.259201309309	-8.86089	0.890314638688477	-9.95254	2.45822701455252e-23	2.2320520207274e-22	21.6512956878476	down-regulated
PRRG4	282.120357622957	-1.78039	0.179016732542111	-9.94541	2.64092730976648e-23	2.39265490776785e-22	21.6211199350931	down-regulated
PRPF18	1827.50697909161	-1.0383	0.104610704797816	-9.92542	3.22747281478515e-23	2.91015580943978e-22	21.5360837583102	down-regulated
COL9A2	142.761254465329	-4.40912	0.444280217744565	-9.92418	3.26788942737427e-23	2.94444481592217e-22	21.530996580711	down-regulated
GPR35	506.980308932822	-1.67597	0.169148810766586	-9.90823	3.83369795458714e-23	3.44292611936183e-22	21.4630722965802	down-regulated
SLC34A3	152.021962422822	-2.80026	0.282788414162698	-9.90231	4.06773833510947e-23	3.64912246859966e-22	21.437811560986	down-regulated
SLC16A6	368.549756508029	-1.62737	0.164747370819623	-9.87796	5.18798713248382e-23	4.64225984718661e-22	21.3332705538756	down-regulated
TP73	149.654873265261	-3.52525	0.357079978966684	-9.87244	5.48132524719763e-23	4.89763066306329e-22	21.3100139687094	down-regulated
S100A9	139.968478840277	-3.07353	0.311702510274462	-9.86046	6.17645862076218e-23	5.50404496201209e-22	21.2593180270483	down-regulated
GAL	409.707924004271	-2.02636	0.205725807202402	-9.84982	6.86683029595254e-23	6.10461956205633e-22	21.2143413959694	down-regulated
ADCY5	196.646048140058	-2.32308	0.236153103081997	-9.83719	7.78522877363539e-23	6.91359725243731e-22	21.1602959236277	down-regulated
UGT1A3	332.282551540785	-2.19615	0.223291508241697	-9.83537	7.92761186494913e-23	7.03243928372529e-22	21.1528940087336	down-regulated
ZNF554	325.097094055004	-1.63934	0.166742042500687	-9.83159	8.2305929800322e-23	7.29595750247227e-22	21.1369177043528	down-regulated
ZNF525	147.044422899399	-2.79068	0.284213971905209	-9.81894	9.33154832097727e-23	8.25112371623858e-22	21.083486901083	down-regulated
ENSG00000246203	432.752597690678	-1.59637	0.162590198974273	-9.81835	9.38718784473416e-23	8.29734509675104e-22	21.0810608466933	down-regulated
PIP5KL1	292.173928628215	-1.91114	0.194688721839528	-9.81638	9.57202837568808e-23	8.45769331603808e-22	21.0727480668324	down-regulated
IGDCC4	671.249888326347	-1.27287	0.12970605344601	-9.81347	9.85222244009881e-23	8.70214932258387e-22	21.0603734688004	down-regulated
NKD2	769.64470181141	-1.60803	0.164015818951561	-9.80414	1.08063489404321e-22	9.54147973064223e-22	21.0203842679564	down-regulated
SLC38A3	93.8741460446571	-4.12372	0.420925263569151	-9.79679	1.1621929036135e-22	1.02505829910125e-21	20.9892514338687	down-regulated
HERC5	432.175572561825	-1.43494	0.146547631152048	-9.79163	1.22308942217987e-22	1.07684287269922e-21	20.9678476620669	down-regulated
FCMR	157.619606239136	-2.55322	0.260912445383291	-9.78573	1.29660204013984e-22	1.14075066001168e-21	20.9428092712826	down-regulated
CCT6B	311.208566892439	-2.638	0.269608574908012	-9.78456	1.31160092305166e-22	1.15353499661326e-21	20.9379692250653	down-regulated
LACC1	734.645560759606	-1.33374	0.136322396614905	-9.78375	1.32221093275849e-22	1.1620372161983e-21	20.934779962711	down-regulated
CHRNA3	232.559744081121	-1.97361	0.201949931622013	-9.77278	1.47351015190627e-22	1.29224376609012e-21	20.8886555542341	down-regulated
LINC01869	107.075791686993	-3.20587	0.328083953094933	-9.77149	1.49239782715289e-22	1.3083425047999e-21	20.8832785492282	down-regulated
SRRM5	330.869184915223	-2.27534	0.232888302491068	-9.77007	1.51343746707429e-22	1.32631569279472e-21	20.8773530918283	down-regulated
KCNQ2	84.3638451347022	-4.05755	0.415454037258803	-9.76655	1.56697573053711e-22	1.37225881737836e-21	20.8625639700006	down-regulated
PPP1R14C	149.134463987237	-2.66128	0.272977390895432	-9.74909	1.86123239947186e-22	1.62418057032851e-21	20.7893656891725	down-regulated
ATCAY	317.150573415951	-11.6096	1.19136	-9.74487	1.94027046296204e-22	1.69195427849099e-21	20.7716113770342	down-regulated
CLDN7	191.806928075449	-2.68091	0.275201191495894	-9.74165	2.00274130885638e-22	1.74581254405684e-21	20.7580023903282	down-regulated
GALNT16	315.471835722555	-2.09534	0.215143883503489	-9.73925	2.0507144413664e-22	1.78636792963125e-21	20.7480290866838	down-regulated
MAT1A	84.3010727022704	-5.2907	0.544519691394038	-9.71628	2.57006385367467e-22	2.2308878211545e-21	20.6515222674026	down-regulated
ATP2B3	133.549365707809	-7.55553	0.777844831158478	-9.71342	2.64320742544068e-22	2.29357090644011e-21	20.6394878289788	down-regulated
UNC5A	96.6093830008279	-3.52732	0.363375516615406	-9.7071	2.81217866354384e-22	2.436760225437e-21	20.6131872028189	down-regulated
LRP2BP	250.744588996603	-3.19593	0.329248245092983	-9.70674	2.82231569138606e-22	2.44468469515282e-21	20.6117771463504	down-regulated
NTSR1	89.3266017509703	-5.75304	0.59326663431843	-9.69722	3.09822020463391e-22	2.68084677025746e-21	20.571728008372	down-regulated
SEMA7A	115.720016629996	-3.26299	0.336727572040965	-9.69029	3.3159878771618e-22	2.86525528032922e-21	20.5428366784438	down-regulated
ERAP2	414.795115486608	-1.59406	0.164501846495878	-9.69023	3.31765749366332e-22	2.86569350153428e-21	20.542770261151	down-regulated
GPR137C	113.595055783341	-3.76366	0.388665866652676	-9.68353	3.54282732594216e-22	3.05270112684817e-21	20.5153157130005	down-regulated
PLCL2	394.618057332743	-1.91986	0.198263930068423	-9.68334	3.54941657530155e-22	3.05731018219196e-21	20.514660497296	down-regulated
SMPD4P1	299.052452378719	-11.5238	1.19165369760271	-9.67041	4.02759174720541e-22	3.46193137210975e-21	20.4606815456488	down-regulated
GAST	303.887560172901	-11.5441	1.1946132566639	-9.66343	4.31181077749384e-22	3.70365014936509e-21	20.4313700439599	down-regulated
LMO2	127.450997478368	-2.89185	0.299306931074293	-9.66182	4.38000528841048e-22	3.75829761120414e-21	20.4250088320625	down-regulated
GRK4	234.777758200467	-2.01742	0.209102799236469	-9.64798	5.01357814496483e-22	4.29446589401227e-21	20.367090842009	down-regulated
CAMK2A	106.158347962805	-3.25884	0.337821825633286	-9.64662	5.08043689467286e-22	4.3487128585929e-21	20.3616392674429	down-regulated
IFI27	188.593240707755	-2.23252	0.231459815765242	-9.64538	5.14222135715214e-22	4.40007083986514e-21	20.3565403314423	down-regulated
TNNI3	304.302445934196	-1.81649	0.188403922254884	-9.64147	5.34177916047868e-22	4.56924149424429e-21	20.3401558879399	down-regulated
PTK6	692.124935841217	-1.15114	0.119412489467446	-9.64003	5.41726324658694e-22	4.63220164949224e-21	20.3342125431158	down-regulated
GRIN3B	557.183792729273	-1.51381	0.157173230135273	-9.63148	5.88745363792991e-22	5.02553694883131e-21	20.2988175296375	down-regulated
SPOCD1	207.670843351212	-2.4613	0.255652574392269	-9.62753	6.11817878004155e-22	5.21887000988181e-21	20.2824235202923	down-regulated
CFAP74	89.4524072804333	-5.32378	0.553157641980578	-9.62434	6.31127711988974e-22	5.38172271046426e-21	20.2690786827182	down-regulated
CKM	284.703436533073	-11.4505	1.19199005573651	-9.60618	7.52910678317112e-22	6.39144422929526e-21	20.1944009963105	down-regulated
ZNF773	701.963782360397	-1.19752	0.124665767599121	-9.60587	7.55168410901124e-22	6.40840332720637e-21	20.1932501627684	down-regulated
CD83	241.013181904641	-2.13956	0.222856129558112	-9.60065	7.94381879369777e-22	6.73421667476745e-21	20.1717129142114	down-regulated
ZNF761	1800.00654882626	-1.06613	0.111167645987047	-9.5903	8.78263046818103e-22	7.43252338831441e-21	20.1288637155035	down-regulated
DLX2	95.5782427862555	-4.06342	0.424064927082978	-9.58206	9.51286992093705e-22	8.0229650800869e-21	20.0956650980578	down-regulated
HSP90B2P	166.014168931739	-3.08514	0.322130370458899	-9.57732	9.95980024668321e-22	8.39415369850374e-21	20.0760230830396	down-regulated
LIMA1	1152.59454782546	-1.35144	0.141477954464913	-9.55227	1.26879893725539e-21	1.06461645341116e-20	19.9728068261865	down-regulated
CCDC82	1603.56060777477	-1.00398	0.105129302448616	-9.54998	1.29720086751137e-21	1.08807743402145e-20	19.9633401965757	down-regulated
MYOZ3	90.4954488442957	-3.75514	0.393594419686554	-9.54062	1.41976961751731e-21	1.18926811454423e-20	19.9247202248257	down-regulated
THAP9	533.985399400334	-1.43076	0.149984537727354	-9.53938	1.43691794195672e-21	1.20281497810245e-20	19.9198011724681	down-regulated
RET	136.830195893285	-2.69354	0.282442375387894	-9.53662	1.47569070894912e-21	1.23485157355783e-20	19.9083852405085	down-regulated
FAM166A	82.5722229541997	-5.02529	0.527013648160768	-9.53542	1.49284604680991e-21	1.24878319463718e-20	19.9035129543766	down-regulated
CABP1	110.727997145545	-6.97669	0.731760872154962	-9.53411	1.51182808095067e-21	1.26423289862944e-20	19.8981729123888	down-regulated
SESN2	690.207337364819	-1.81168	0.190092704573628	-9.53051	1.56513809089889e-21	1.30792488870642e-20	19.8834171958871	down-regulated
CD82	489.882886619727	-1.51619	0.159183761424138	-9.5248	1.6535991514068e-21	1.38091213687264e-20	19.8598339533441	down-regulated
NXPH4	554.426224875973	-1.77347	0.186249796232219	-9.52201	1.69854234934716e-21	1.41604551897552e-20	19.8489227859668	down-regulated
KBTBD13	264.747684230726	-11.3477	1.19229084565214	-9.51757	1.77268320975685e-21	1.47735586500764e-20	19.8305148793708	down-regulated
ZNF385C	200.969489980889	-2.27229	0.238924255297632	-9.51052	1.89708584612192e-21	1.57943128262741e-20	19.8014992644881	down-regulated
LY75	91.6339135697452	-4.62941	0.486846730875845	-9.50898	1.92547524357897e-21	1.60252585093548e-20	19.7951949559882	down-regulated
KIRREL2	137.601582722038	-2.6881	0.283183717859881	-9.49241	2.25753683109743e-21	1.87194073192781e-20	19.727707905707	down-regulated
NTNG2	448.142481501251	-1.81903	0.191636423620605	-9.49208	2.26469969494665e-21	1.87724871821873e-20	19.7264781835353	down-regulated
ZNF17	648.186290756517	-1.25864	0.132655865994021	-9.48802	2.35462447662345e-21	1.95113286042761e-20	19.7097131567531	down-regulated
HHAT	553.84573443774	-1.66874	0.175963126719403	-9.48349	2.45926084528385e-21	2.03305494158073e-20	19.6918508847644	down-regulated
NACAD	88.966132219613	-3.87894	0.409039164962927	-9.48306	2.46943258994101e-21	2.04077949068809e-20	19.6902039189248	down-regulated
ST8SIA6	150.470296871083	-2.58975	0.27342366482984	-9.47155	2.75721002602658e-21	2.27631418491652e-20	19.6427677952829	down-regulated
MAN1C1	227.542956515616	-2.26683	0.239746291702597	-9.45511	3.22696543724728e-21	2.65879518579613e-20	19.5753151162617	down-regulated
EFNB3	260.909717772618	-2.30557	0.243909942127685	-9.45254	3.30691889283088e-21	2.72103352957499e-20	19.5652661066511	down-regulated
FXYD3	187.496056666084	-2.27669	0.240854222046315	-9.45257	3.30615134027876e-21	2.72103352957499e-20	19.5652661066511	down-regulated
ENSG00000286620	100.300153255496	-3.35657	0.355146784795428	-9.45121	3.34943101654524e-21	2.75509420820398e-20	19.559863546212	down-regulated
NUTM2F	80.3289392605228	-4.73153	0.500662819840641	-9.45053	3.37109497346784e-21	2.77198910226581e-20	19.5572084814322	down-regulated
CDRT15P6	79.5006294703742	-3.95932	0.418971733306107	-9.4501	3.3850954456088e-21	2.78257328860114e-20	19.5555533882095	down-regulated
GLT8D2	98.7240097931175	-3.78098	0.400240014016598	-9.44677	3.4943530992993e-21	2.8704695969319e-20	19.542047048676	down-regulated
PRDM6	206.707919440817	-2.36444	0.251053955158937	-9.41805	4.59521545327752e-21	3.74731231737339e-20	19.426280109399	down-regulated
PCDH10	186.548404269618	-3.25769	0.345930176432297	-9.4172	4.63280117640387e-21	3.77671344579062e-20	19.4228859655651	down-regulated
COL8A2	84.8246357124893	-4.33541	0.460580601380251	-9.41293	4.82495143493361e-21	3.93205629004904e-20	19.4053802735757	down-regulated
SYT8	77.9830456616274	-4.20964	0.447286470258679	-9.4115	4.89116263856296e-21	3.98206543480364e-20	19.399891607759	down-regulated
CTRC	80.5363687397905	-4.12594	0.438562272404833	-9.40787	5.0627691885956e-21	4.11905564479402e-20	19.3852023410701	down-regulated
ENSG00000279811	116.829493567583	-7.36641	0.784006050472399	-9.39586	5.67518912618828e-21	4.60516005065153e-20	19.3367552714591	down-regulated
ARHGAP40	77.6800732084495	-5.02333	0.534636314503662	-9.39579	5.67925324074605e-21	4.60694145741598e-20	19.3365873064976	down-regulated
USP6	130.352404710636	-3.13346	0.333565088737387	-9.39384	5.78525767528132e-21	4.69138724378405e-20	19.3286987173625	down-regulated
ENSG00000241255	131.196984362505	-3.38322	0.360430408917484	-9.3866	6.19666874320281e-21	5.02005513826604e-20	19.2992915127129	down-regulated
CYP21A1P	88.3191005664827	-6.36437	0.679137627880086	-9.37126	7.16741996181177e-21	5.78556767840812e-20	19.237654021759	down-regulated
CTBP2P9	80.7837550644753	-4.37452	0.466808525077013	-9.37112	7.17663083057114e-21	5.79110648887855e-20	19.2372384490353	down-regulated
ERICH3	240.814906094984	-11.212	1.19701331478334	-9.36661	7.49003065654075e-21	6.04004696581755e-20	19.218959684406	down-regulated
ACOXL	141.083193943729	-4.2791	0.457291643829921	-9.35749	8.16534324429302e-21	6.57387464592787e-20	19.1821785815292	down-regulated
VPREB3	85.5243120992022	-3.66558	0.392192018294279	-9.3464	9.06809296653863e-21	7.28639595212224e-20	19.1374872323324	down-regulated
DPF3	79.4856518776294	-5.6165	0.600956838832539	-9.34592	9.10905414735366e-21	7.31692417206134e-20	19.1356714456945	down-regulated
KRT8P11	92.5042994461682	-4.5635	0.488297600785969	-9.34574	9.1249793865818e-21	7.3273287243653e-20	19.1350543243644	down-regulated
KLHL38	233.060343164048	-11.1629	1.19462404928359	-9.34428	9.25140441172401e-21	7.42401111841863e-20	19.1293613863764	down-regulated
CNGA4	100.600458708869	-3.46119	0.370610486396681	-9.33917	9.70911088128769e-21	7.7811769000489e-20	19.1089547111669	down-regulated
GCK	82.0275633443006	-4.76726	0.511308712135029	-9.32365	1.12406011216728e-20	8.97936807684635e-20	19.0467542257375	down-regulated
ZFP3	407.357331689407	-1.37506	0.147656814255621	-9.31255	1.24797854048497e-20	9.95636471845805e-20	19.0018992028316	down-regulated
GRIK4	75.6697435050447	-5.0165	0.53914276343323	-9.30459	1.34509114036464e-20	1.07207199457708e-19	18.9697760487872	down-regulated
BEST4	92.6344251549645	-3.69302	0.396954575364531	-9.30338	1.36052358420837e-20	1.08367132141857e-19	18.965102419771	down-regulated
CTSS	1356.15698340722	-1.15335	0.124006934299206	-9.30072	1.39498451002006e-20	1.1107609218674e-19	18.9543794077441	down-regulated
KCNS1	80.3031205172109	-3.96548	0.426391685108713	-9.30009	1.40329297758751e-20	1.11668394452538e-19	18.9520697280225	down-regulated
NIM1K	112.200834118717	-3.60581	0.388055575956228	-9.292	1.51416474941954e-20	1.20293874968387e-19	18.9197564851718	down-regulated
C6orf226	614.379569943223	-1.29189	0.139058006608085	-9.29028	1.53882872977285e-20	1.22135240973472e-19	18.9131590063905	down-regulated
NLRP1	89.5533640818685	-3.42906	0.369717367098694	-9.27481	1.77927614996214e-20	1.40947029720009e-19	18.8509440719017	down-regulated
PLEKHG1	204.818278808942	-2.09154	0.225942036126206	-9.25698	2.10298208618059e-20	1.66162546117064e-19	18.7794668617057	down-regulated
MMP1	108.577824434264	-7.20518	0.77959891369181	-9.24216	2.41559344142831e-20	1.90253065553005e-19	18.7206683367018	down-regulated
SLC44A5	333.500585511549	-1.60553	0.17373120150994	-9.24146	2.43152808747163e-20	1.91385793142882e-19	18.7180903036994	down-regulated
NUP210L	91.2902111828889	-3.58933	0.388650572024868	-9.23537	2.57400398447942e-20	2.02277163612963e-19	18.6940531447956	down-regulated
TBX21	215.03664445444	-11.0462	1.19667124845284	-9.2308	2.68625210192184e-20	2.10829311736954e-19	18.6760690090162	down-regulated
COL28A1	118.058208921272	-3.11426	0.337657349706473	-9.22314	2.88536394472445e-20	2.2602475997886e-19	18.6458439832721	down-regulated
PTPRVP	87.5959400229403	-3.53918	0.38373813317051	-9.22289	2.89189202258656e-20	2.2646417452606e-19	18.6450004913829	down-regulated
ZNF461	842.66217966714	-1.15589	0.125591208923574	-9.20358	3.46222599773498e-20	2.69330373291772e-19	18.5697146669777	down-regulated
RHCE	73.1191487602541	-4.78148	0.519541921269871	-9.20327	3.47225340106643e-20	2.70025207706908e-19	18.5685956911855	down-regulated
RAB33A	79.5378280534834	-4.95589	0.538545597150957	-9.20235	3.50193983046446e-20	2.72247936614979e-19	18.5650354031062	down-regulated
MEIG1	164.244378221005	-2.63304	0.286138823469385	-9.20197	3.51431014619699e-20	2.73123498499521e-19	18.5636409332193	down-regulated
STAB1	212.157501125943	-11.0251	1.19839578986604	-9.19988	3.58344940472845e-20	2.78321344440346e-19	18.5554534863817	down-regulated
ZNF383	872.951628504022	-1.2188	0.132570007017361	-9.19366	3.79704455831922e-20	2.94539781156971e-19	18.5308560401971	down-regulated
PDE1B	109.018200972774	-7.2143	0.784821418264328	-9.19228	3.84591284316514e-20	2.98236688926414e-19	18.5254389309093	down-regulated
ZNF550	1118.69139101639	-1.00339	0.109240234035663	-9.18513	4.110370644339e-20	3.18243898003282e-19	18.4972399147408	down-regulated
ANO4	75.9312653050298	-5.02981	0.547785562254248	-9.18208	4.22858300220429e-20	3.27293652026186e-19	18.4850624179023	down-regulated
ARMCX1	95.1512569527142	-3.23577	0.35268728376664	-9.17462	4.53163970721406e-20	3.50090824388095e-19	18.455819271611	down-regulated
GPBAR1	82.0682966087235	-5.89461	0.643204804626768	-9.16443	4.9808889890009e-20	3.83475563263117e-19	18.4162623059735	down-regulated
GRAMD2A	122.25946024977	-3.01437	0.328938776649811	-9.16393	5.00406439661569e-20	3.85139542633063e-19	18.414381889672	down-regulated
KCNJ12	152.388601005156	-2.29665	0.250670697893168	-9.16203	5.0930332323165e-20	3.91864716738659e-19	18.4068638383732	down-regulated
ENSG00000285779	862.678183193296	-13.0514	1.42513262584305	-9.15804	5.28508590338885e-20	4.06387828104622e-19	18.3910593082688	down-regulated
ETFRF1	698.259935153432	-1.0601	0.11578261650514	-9.15595	5.38836954191693e-20	4.13942305850222e-19	18.3830601854418	down-regulated
GCGR	76.9338985072121	-4.83526	0.528192196866143	-9.15436	5.46806069758368e-20	4.19802654365721e-19	18.376954819749	down-regulated
APOBR	79.4748223685302	-4.7408	0.51795435584559	-9.15293	5.54090901221463e-20	4.25130684622207e-19	18.3714775478647	down-regulated
ZBTB46	404.661431499677	-1.51207	0.165216484718926	-9.15203	5.58753408529777e-20	4.28441338322739e-19	18.368108632753	down-regulated
ATP1B2	1256.50355095702	-8.42572	0.92090468750275	-9.1494	5.72517495371253e-20	4.38313704841371e-19	18.3582149499622	down-regulated
OTOGL	198.28312177739	-10.9313	1.19697830869756	-9.13237	6.70146513367537e-20	5.1162749605254e-19	18.2910461235698	down-regulated
ENSG00000217801	454.646220310863	-1.3358	0.146360490420822	-9.12678	7.05638772769362e-20	5.38383988351771e-19	18.2689078645974	down-regulated
SPNS2	331.407666644996	-1.71953	0.188458806360614	-9.12415	7.23032813039856e-20	5.50980058950805e-19	18.258864118833	down-regulated
ENSG00000280138	325.634090267963	-1.85361	0.203181432793366	-9.12291	7.31325205465091e-20	5.57126976672602e-19	18.2540458120371	down-regulated
IL16	72.3550071558936	-5.18279	0.568204911011945	-9.12134	7.42035018099131e-20	5.65111129631751e-19	18.2478661393663	down-regulated
HCAR3	98.2196789107378	-4.8785	0.534897338910982	-9.12045	7.4812946928318e-20	5.69400669242635e-19	18.2445820267426	down-regulated
CCNB3	335.115710000854	-1.82609	0.200745058336022	-9.09658	9.32212343637918e-20	7.07975930232962e-19	18.1499815072039	down-regulated
IQCD	273.88569496908	-1.68679	0.185444034259183	-9.09595	9.37632346841067e-20	7.11872886181891e-19	18.1475975481584	down-regulated
CARD9	581.205897401123	-1.46813	0.161456327469517	-9.09306	9.6287255660909e-20	7.3081078403717e-19	18.136195052708	down-regulated
YPEL4	125.499435321724	-2.58716	0.284552131723906	-9.09203	9.72111582664687e-20	7.37596021417355e-19	18.1321814345265	down-regulated
CD79A	109.483028672482	-2.8877	0.317749261934183	-9.08798	1.00894069620657e-19	7.65069395351715e-19	18.1162991705308	down-regulated
PDE2A	560.468548716369	-4.36073	0.480040907652738	-9.08407	1.04588638435981e-19	7.92110327104088e-19	18.1012143245778	down-regulated
LGI4	91.0963548229329	-4.52818	0.498784344379061	-9.07843	1.10156536874362e-19	8.34023018128617e-19	18.0788219631413	down-regulated
IGFL2	209.270907287033	-2.2155	0.244057082800016	-9.07778	1.10815763935088e-19	8.3849914442228e-19	18.0764973761979	down-regulated
CX3CR1	88.9212177745259	-3.74451	0.412560054846118	-9.07627	1.1235916870226e-19	8.49395347086204e-19	18.0708901223662	down-regulated
ATP1A2	76.7467228925614	-4.16765	0.459571195903613	-9.06856	1.20596607997255e-19	9.10550560596731e-19	18.0406959339124	down-regulated
PLEKHM3	770.579286913713	-1.09084	0.120424877869478	-9.05825	1.32561158961567e-19	9.9966279924153e-19	18.0001464691248	down-regulated
NUTM2B	218.569751589323	-2.00113	0.221091213466227	-9.05115	1.414702940366e-19	1.06554405395364e-18	17.9724285900667	down-regulated
ZNF549	481.645	-1.23771	0.136837885014822	-9.0451	1.49523161918685e-19	1.12482300507154e-18	17.9489158099688	down-regulated
ETV7	182.327034028607	-10.8094	1.19816632057872	-9.02165	1.85271647659361e-19	1.38950917496153e-18	17.8571385812205	down-regulated
TENT5B	398.549275249482	-1.74433	0.193396426927271	-9.01944	1.89056195499837e-19	1.41659979679695e-18	17.8487528248347	down-regulated
GON7	969.441210100314	-1.39221	0.154359926658247	-9.01923	1.89418693827375e-19	1.41888472811682e-18	17.8480528857097	down-regulated
TSGA10	305.195272417121	-1.93157	0.214343889499833	-9.01153	2.03194122206136e-19	1.51976380480147e-18	17.818223903004	down-regulated
KALRN	253.930602712557	-1.80669	0.20070234597098	-9.00185	2.21941253233084e-19	1.65796841657636e-18	17.7804237467877	down-regulated
CD79B	70.6934522356046	-5.30919	0.589813170072747	-9.00148	2.2268919212592e-19	1.66305179166561e-18	17.7790942255343	down-regulated
FUT7	70.3666372348442	-5.25554	0.585046370991053	-8.98312	2.63187456933826e-19	1.95896654237098e-18	17.7079729813548	down-regulated
BTBD17	100.285482742137	-7.08504	0.78884177461344	-8.98158	2.66910005381012e-19	1.98547539307565e-18	17.7021354909812	down-regulated
BTLA	74.2804774225077	-4.89458	0.546081318338252	-8.96309	3.1569373538891e-19	2.34059607964132e-18	17.6306735267213	down-regulated
SERPINF1	418.16245559711	-1.63627	0.182573030812812	-8.96227	3.18049306050434e-19	2.35735162139366e-18	17.6275756334954	down-regulated
PDPK2P	668.394879022173	-1.13862	0.127063700627727	-8.96103	3.21662256191455e-19	2.38341386823918e-18	17.6228005379783	down-regulated
FAM90A12P	176.422144496369	-10.7598	1.2013201016151	-8.95669	3.34580847437689e-19	2.4776470564836e-18	17.605960559275	down-regulated
EFCAB5	102.380241338392	-2.94547	0.329513705567163	-8.93883	3.93328625032688e-19	2.90309498931312e-18	17.5371387538137	down-regulated
C1orf194	66.7408599552674	-4.70778	0.526843917578201	-8.93582	4.04186227312352e-19	2.98234028006707e-18	17.5254428057776	down-regulated
PSMB11	170.989167473764	-10.7157	1.19930986676813	-8.93488	4.07607237428793e-19	3.00398613366057e-18	17.5223020763578	down-regulated
PITX3	81.954109101654	-4.70927	0.52714280211401	-8.93358	4.12449005138146e-19	3.0387500534885e-18	17.5173050205041	down-regulated
GPNMB	190.301951738162	-2.06702	0.231488961073224	-8.92925	4.28910783279896e-19	3.15532934330528e-18	17.5009553037684	down-regulated
TBX10	168.961741106893	-10.6992	1.19953772302753	-8.91943	4.68706883862834e-19	3.44193092075859e-18	17.4631978501719	down-regulated
FBXL16	357.743054446553	-1.73475	0.194498422454107	-8.91911	4.70038958081822e-19	3.45068504902712e-18	17.4620946778315	down-regulated
HSPB6	111.736746903178	-3.12449	0.350339949110417	-8.91846	4.72810510805247e-19	3.46999842583237e-18	17.4596707222271	down-regulated
PNCK	76.715083574822	-5.98367	0.670953297018121	-8.91816	4.74120475036002e-19	3.47857677100819e-18	17.4585984074688	down-regulated
ANXA2R	385.11	-1.96923	0.220817726502998	-8.91791	4.75173055952914e-19	3.48526217654009e-18	17.4577645468222	down-regulated
RPS6KL1	134.531989086202	-2.55363	0.286537922597868	-8.91202	5.01094436240033e-19	3.67101932903099e-18	17.4352133287977	down-regulated
CARMIL2	190.299997668983	-2.25927	0.253556492148404	-8.91031	5.08898476093527e-19	3.72597720007651e-18	17.4287598069576	down-regulated
WDR53	830.801419877287	-1.02047	0.114531443307222	-8.90998	5.10411753139796e-19	3.73594730950186e-18	17.4275992575367	down-regulated
CR2	73.8720294549771	-5.7878	0.650046342793302	-8.90367	5.40298935079971e-19	3.95001463451703e-18	17.4034012953411	down-regulated
OLAH	66.1933542381713	-4.39341	0.493602268748104	-8.90072	5.54873283939154e-19	4.0517583517974e-18	17.3923564640053	down-regulated
ADAMTS4	68.0176819418339	-4.43762	0.499172768814715	-8.88995	6.11376319365742e-19	4.45643081756484e-18	17.3510128311541	down-regulated
CRTAM	167.481553706108	-10.6892	1.20296229132746	-8.8857	6.3517103867713e-19	4.62577147576621e-18	17.3348158262271	down-regulated
LMOD1	126.478372004709	-2.80157	0.315470423475531	-8.8806	6.64980851029669e-19	4.84143766674052e-18	17.3150256552937	down-regulated
ATP1A4	119.731053623666	-7.76763	0.87491605188135	-8.87815	6.79824936011218e-19	4.94804969664852e-18	17.3055659471044	down-regulated
GOLGA6D	68.9597196656245	-5.58804	0.629768283213486	-8.87317	7.10957252647963e-19	5.17158990624892e-18	17.2863759208594	down-regulated
CLCN1	69.0572191944295	-5.56285	0.626972830129195	-8.87255	7.14884408948776e-19	5.19862255144697e-18	17.2841117135867	down-regulated
STOML1	1300.75188501279	-1.14987	0.129644758752415	-8.86941	7.35341730861696e-19	5.3426596961988e-18	17.2722424875745	down-regulated
PLEKHA8P1	629.998218849378	-1.16863	0.131821218760305	-8.86526	7.63238139243736e-19	5.54044364211914e-18	17.2564554584466	down-regulated
CCDC38	97.7107859165086	-3.27989	0.370522898601348	-8.85206	8.5917900718306e-19	6.22589091272099e-18	17.2057984931007	down-regulated
PPP1R1B	75.2513461960547	-5.77207	0.6523279206487	-8.84842	8.87653554659167e-19	6.4284475409688e-18	17.1918938957843	down-regulated
VIT	160.762933887851	-10.625	1.20306386164183	-8.83164	1.03151417778627e-18	7.45496555578632e-18	17.1275543587793	down-regulated
KCNH2	174.179345676742	-2.2998	0.260443383831718	-8.83031	1.04381536725976e-18	7.54165780588732e-18	17.1225331770996	down-regulated
BBS9	972.877402653917	-1.03404	0.117110477086991	-8.82963	1.05018597031017e-18	7.5854628010801e-18	17.1200179170758	down-regulated
CCK	132.813399172729	-2.67251	0.302954809413293	-8.82148	1.12958547414283e-18	8.15418480485186e-18	17.088619450007	down-regulated
IRF8	72.7949514837801	-5.33542	0.60540576339569	-8.81297	1.21878045236855e-18	8.78776709909026e-18	17.0561214616423	down-regulated
ZNF462	1029.84426526169	-1.02259	0.116036136142279	-8.81267	1.22201087998938e-18	8.80848310336206e-18	17.0550988743984	down-regulated
COL3A1	138.873197219532	-3.02498	0.343623558142741	-8.80318	1.3298956834827e-18	9.57214259539137e-18	17.0189908403626	down-regulated
B3GNT7	402.310612114623	-1.43469	0.163046027389579	-8.79932	1.3764700056473e-18	9.89869853536091e-18	17.0044219019748	down-regulated
MOBP	159.51308884427	-10.6191	1.20755270417898	-8.79393	1.44416995081637e-18	1.03764726399083e-17	16.9839502547122	down-regulated
SLC16A1	3170.21925745924	-1.20114	0.136593720833701	-8.79353	1.44938115624475e-18	1.040784860581e-17	16.9826390337158	down-regulated
COMP	153.671710776414	-10.5625	1.20181607111999	-8.78882	1.51136662162906e-18	1.0840328762409e-17	16.9649575464383	down-regulated
FRMPD2	92.8337703362326	-3.10714	0.353570654232239	-8.78789	1.52396634349615e-18	1.09275213204966e-17	16.9614783374931	down-regulated
FLG	517.954205192097	-1.17828	0.134121888830364	-8.78511	1.56214247307944e-18	1.11947489088239e-17	16.9509856429278	down-regulated
OTOP2	96.3866054083104	-7.09386	0.807524809102876	-8.7847	1.56787952298694e-18	1.1232596919696e-17	16.9495198254385	down-regulated
C12orf60	408.132633927625	-1.65764	0.188751079189689	-8.78214	1.60386891739666e-18	1.14804229244084e-17	16.9400421127783	down-regulated
IL24	156.788872263392	-10.5886	1.20630473492368	-8.77775	1.66784056542263e-18	1.19279389668693e-17	16.9234345917566	down-regulated
TRAC	153.537790978891	-10.5617	1.20534124813835	-8.7624	1.91133679992786e-18	1.36233203618919e-17	16.8657170305213	down-regulated
MARVELD3	260.844242901523	-2.0878	0.238670110779536	-8.74765	2.17844340788281e-18	1.54942258774169e-17	16.8098301171055	down-regulated
EXO5	577.930285608704	-1.23175	0.141130414680291	-8.72772	2.59861040511065e-18	1.83977437411797e-17	16.7352354346447	down-regulated
FCGR1A	63.3461311808836	-4.29794	0.492624439684637	-8.72458	2.67167681510823e-18	1.8898759496714e-17	16.7235667017216	down-regulated
SYCP2	394.893475339168	-1.96046	0.22476650398373	-8.72221	2.7283224869063e-18	1.92828572096371e-17	16.7148286147048	down-regulated
CLTRN	135.018677601543	-2.91633	0.334436906381156	-8.72012	2.77903399126499e-18	1.96300131669526e-17	16.7070794090942	down-regulated
PLA1A	115.979027799729	-3.51342	0.403138455425005	-8.71518	2.90301288603083e-18	2.04647050804781e-17	16.6889945096478	down-regulated
EN2	338.282275492597	-1.52333	0.174860710452781	-8.71165	2.99471077691523e-18	2.1087006590264e-17	16.6759850662348	down-regulated
SCUBE1	111.526993338067	-7.67236	0.880910149720736	-8.70959	3.04988715590829e-18	2.14571398879712e-17	16.6684281674424	down-regulated
SRL	144.356815642002	-10.4731	1.20378626174477	-8.70014	3.31473343952697e-18	2.32606913610074e-17	16.6333773811893	down-regulated
USP17L2	148.713223417846	-10.5172	1.21008760246915	-8.69124	3.58508852374616e-18	2.51078415589177e-17	16.6001906205942	down-regulated
PPP5D1P	112.222204445102	-2.67647	0.308210447983589	-8.68391	3.82404755848136e-18	2.67509706049042e-17	16.5726604558593	down-regulated
ZBTB43	1062.38067087304	-1.051	0.121061241505186	-8.68158	3.90299076533717e-18	2.72877278352501e-17	16.5640326251837	down-regulated
ACSL5	435.309256000842	-1.48709	0.171349709544092	-8.67868	4.00389290696528e-18	2.79773151764479e-17	16.5531939646119	down-regulated
TIAF1	523.704493315935	-1.2248	0.141155106300641	-8.67698	4.0642600619549e-18	2.8366970285196e-17	16.5471870462515	down-regulated
KCNJ4	143.052363814604	-10.4568	1.2051947421554	-8.67643	4.08391005953454e-18	2.84960517372333e-17	16.5452153093781	down-regulated
SLCO2A1	142.772000616822	-10.4543	1.20512213972104	-8.67486	4.14049760009789e-18	2.88745535608524e-17	16.5394847218204	down-regulated
H3-2	75.5395277354534	-4.24982	0.49023238394988	-8.66899	4.35982536472705e-18	3.03782970297488e-17	16.5174365758094	down-regulated
SLC6A4	78.4249012914353	-3.74479	0.432282069986607	-8.66284	4.60158103815891e-18	3.20175488999981e-17	16.4946119185114	down-regulated
ATP5F1AP3	77.1086259712225	-3.49918	0.403943956879551	-8.66255	4.61340729387084e-18	3.209077782407e-17	16.4936197562417	down-regulated
RPL13AP20	332.168362353916	-1.65762	0.191423573612168	-8.65943	4.74135316553133e-18	3.29435846213862e-17	16.4822291466178	down-regulated
NTN5	192.120632155125	-1.9725	0.22796447311846	-8.65265	5.03152933626703e-18	3.49007487894358e-17	16.457165255229	down-regulated
KLHL24	858.471534464183	-1.13655	0.131359822791993	-8.65218	5.05243330749275e-18	3.50358891410158e-17	16.4554868565024	down-regulated
CD36	93.5466239175472	-4.44874	0.514525361371393	-8.6463	5.31946813061602e-18	3.68565284867752e-17	16.4334855733502	down-regulated
BMP10	139.371371278727	-10.4239	1.20591394519606	-8.644	5.42773567495867e-18	3.75961056080588e-17	16.4248571391288	down-regulated
ABHD8	737.751364385689	-1.07869	0.124958253449893	-8.63237	6.00939185813467e-18	4.14967865789176e-17	16.3819855328079	down-regulated
SFRP4	682.290739618462	-1.09063	0.126380473677998	-8.62974	6.14892858612911e-18	4.24484423145491e-17	16.3721382419715	down-regulated
PRR20G	138.704626298335	-10.413	1.20697437801003	-8.62739	6.2768370645203e-18	4.32345871233737e-17	16.3641686840434	down-regulated
TUBA5P	175.230460247223	-2.75138	0.319127338325354	-8.62158	6.60378920421037e-18	4.54358390907603e-17	16.342601447162	down-regulated
ENSG00000288675	275.522025594566	-2.0622	0.239442714461241	-8.6125	7.1484588754561e-18	4.90600802332249e-17	16.3092717458806	down-regulated
AIF1L	264.530724018016	-2.11498	0.245737795319315	-8.60666	7.52207459641514e-18	5.15524556438215e-17	16.2877506427537	down-regulated
FAM90A24P	141.205559471915	-10.4432	1.21368860018457	-8.60448	7.66620279614977e-18	5.24964531474122e-17	16.2798700381282	down-regulated
WDFY4	61.7060767829832	-4.64177	0.539508941534971	-8.60369	7.71903475639922e-18	5.28435559052357e-17	16.277007965886	down-regulated
ENSG00000255085	136.574554246844	-10.3949	1.20869856462752	-8.60005	7.9679622338019e-18	5.44871581103147e-17	16.2637058430262	down-regulated
FOXJ1	765.641749309468	-7.49969	0.873588980469226	-8.58492	9.09031498511041e-18	6.20244796603769e-17	16.2074368704508	down-regulated
SPOCK2	388.106951222427	-1.41795	0.165829029343461	-8.55067	1.22379078777104e-17	8.28360529932228e-17	16.0817806027301	down-regulated
TKTL1	128.823601831434	-10.3075	1.20578052803975	-8.5484	1.24808874565965e-17	8.43649129640846e-17	16.073838137194	down-regulated
LGALS7B	134.886603511114	-10.3704	1.21328368403135	-8.54739	1.25901802656565e-17	8.50337325777983e-17	16.0704087570358	down-regulated
STX1B	690.730139794369	-1.28091	0.149923353340133	-8.54379	1.29894579916279e-17	8.7634405695022e-17	16.057325354221	down-regulated
ENSG00000267706	129.133544479802	-10.3115	1.20697763350676	-8.54327	1.30471086950682e-17	8.79992677293626e-17	16.055520941741	down-regulated
TRPM3	132.537463365458	-10.3517	1.21172394080441	-8.54294	1.30850018923948e-17	8.82307075085659e-17	16.0543802382182	down-regulated
CNIH2	196.143406299758	-1.96387	0.229996504840122	-8.53869	1.35746982510859e-17	9.14326396955656e-17	16.0388987418019	down-regulated
GAB3	89.1826538290487	-3.87519	0.453998694167051	-8.53568	1.39336831980705e-17	9.37737259620079e-17	16.0279188275924	down-regulated
HSD17B6	193.082826941188	-1.85834	0.217715366633776	-8.53564	1.39385676085236e-17	9.37809958202301e-17	16.0278851599856	down-regulated
LAPTM5	128.595156885021	-10.3038	1.20727859902977	-8.53473	1.4047834539849e-17	9.44903730085558e-17	16.0246124365938	down-regulated
SV2A	80.5484166163767	-3.81241	0.446748550069542	-8.53369	1.41756800760485e-17	9.52982997640438e-17	16.0209148476269	down-regulated
PRRT2	304.864094495809	-1.58658	0.185967429002806	-8.53148	1.44487689589118e-17	9.70547826635133e-17	16.0129830585941	down-regulated
GRAPL	78.5943750954757	-4.31507	0.505955156488193	-8.52857	1.48169008048579e-17	9.94733765363172e-17	16.0022931400637	down-regulated
ADPRM	549.69902953352	-1.20024	0.14080627372257	-8.52408	1.54029991164319e-17	1.03267537182018e-16	15.9860361803047	down-regulated
ENSG00000239392	73.5602558919088	-6.00904	0.70525153231986	-8.52042	1.58975876222164e-17	1.06496557082304e-16	15.9726644322659	down-regulated
LRRC66	128.129	-2.44832	0.287447853122609	-8.51745	1.6310033647945e-17	1.09170499454016e-16	15.9618947027964	down-regulated
ZSWIM4	255.165487597474	-2.0045	0.235374394832341	-8.51624	1.64821006419962e-17	1.10292276065822e-16	15.9574549007914	down-regulated
USP49	1314.98645212742	-1.27846	0.150253016841515	-8.50874	1.75838219481695e-17	1.17473273351294e-16	15.9300609296165	down-regulated
TMEM171	126.425733480314	-2.35476	0.276750050235631	-8.50862	1.76008405901083e-17	1.17537746705321e-16	15.929822639322	down-regulated
JPH3	193.00966659353	-2.6331	0.309477816180259	-8.50819	1.76670724046599e-17	1.17933568621629e-16	15.9283625596877	down-regulated
DCLK3	126.141047940085	-10.2788	1.20958318771729	-8.49784	1.93147898174711e-17	1.28793129180497e-16	15.8901073049777	down-regulated
TNFAIP3	655.969773369538	-1.09851	0.129282139435918	-8.49699	1.9457399333471e-17	1.29708980088893e-16	15.8870299555424	down-regulated
MYPN	1061.69480154727	-1.01193	0.119109565668465	-8.49578	1.96608977351692e-17	1.31030130026329e-16	15.8826288280115	down-regulated
TAFA2	110.945238019797	-2.95181	0.347476280281674	-8.49499	1.97944882316906e-17	1.31849155333055e-16	15.879922648088	down-regulated
RIMS4	429.918546407324	-1.43116	0.168570316648449	-8.49001	2.06616757810132e-17	1.37513939350307e-16	15.8616532765531	down-regulated
CLIC2	113.663506665662	-2.55262	0.300779883378435	-8.48667	2.12648751320765e-17	1.41490337855857e-16	15.8492732163882	down-regulated
NOS2	83.733898241808	-4.41229	0.519945098322853	-8.48606	2.13754901269679e-17	1.42187960769027e-16	15.8471371743019	down-regulated
FRG2	63.2987743271553	-4.94254	0.582556324165429	-8.48422	2.1716548032695e-17	1.44417680631777e-16	15.8403796341157	down-regulated
ACTN3	73.6033017716334	-5.75351	0.678528936600372	-8.47938	2.26394868688805e-17	1.50514733088361e-16	15.8224209872076	down-regulated
KLHL3	418.74447637529	-1.31323	0.155003159318745	-8.47225	2.40702619202024e-17	1.59854551954965e-16	15.7962749924184	down-regulated
GREM1	204.653056951237	-1.91008	0.225540271289898	-8.46891	2.47709085975398e-17	1.64419073437413e-16	15.7840478035348	down-regulated
SEPTIN3	399.912798723069	-1.32864	0.157138084383557	-8.45524	2.785179973008e-17	1.84322836764009e-16	15.7344208543296	down-regulated
DRAXIN	123.858358048507	-10.2495	1.21242805862869	-8.45367	2.82277008101904e-17	1.86710297926701e-16	15.7288317280638	down-regulated
RHEBL1	299.208455368218	-1.7247	0.204078975550912	-8.45113	2.88506714098375e-17	1.90626307047792e-16	15.7198171655166	down-regulated
CELF3	95.6614323023257	-2.92378	0.34626937639291	-8.44365	3.07580483404594e-17	2.03011354133602e-16	15.6924796719406	down-regulated
ARL14	160.142568348285	-2.48325	0.29413474189284	-8.44256	3.10468272924852e-17	2.04862523130178e-16	15.6885374827233	down-regulated
MMP25	168.623590427047	-2.108	0.249779866016695	-8.43945	3.18844787582304e-17	2.10164751429918e-16	15.6774401215292	down-regulated
GRIN1	193.312527568801	-2.36775	0.280605743436439	-8.43801	3.2279169155784e-17	2.12652613048741e-16	15.6723292763608	down-regulated
FAM205A	69.8984803222999	-4.84994	0.574912748433259	-8.43596	3.28486092254496e-17	2.16288438735519e-16	15.6649666942806	down-regulated
MRGPRE	122.534450294604	-10.2332	1.21395509819818	-8.42963	3.46750714519046e-17	2.28131801823419e-16	15.641814169376	down-regulated
USH1G	123.880456039646	-10.2495	1.21606745645395	-8.42842	3.50364918410161e-17	2.30386662273867e-16	15.6375426670393	down-regulated
CXCL11	119.250200680735	-10.199	1.21018338805096	-8.42767	3.5260276818019e-17	2.31796358431415e-16	15.6348933911747	down-regulated
NPPC	119.261330716877	-10.1987	1.21015362179709	-8.42758	3.5289416176669e-17	2.31926069738002e-16	15.6346504315819	down-regulated
TYW1B	639.739075725377	-1.20159	0.142744873713673	-8.41777	3.83727189426842e-17	2.51787135314094e-16	15.5989664632863	down-regulated
ZNF56P	91.6188103234844	-2.88576	0.342878289859235	-8.41628	3.88620809784009e-17	2.54862468816052e-16	15.5936941142607	down-regulated
ZNF594	500.338264616443	-1.27204	0.15125401411622	-8.40995	4.10176730885787e-17	2.68641784532318e-16	15.5708264362672	down-regulated
ITIH5	125.471609510426	-4.03782	0.480373194176968	-8.40559	4.25705220844542e-17	2.78589994803814e-16	15.5550344847517	down-regulated
FUT3	77.9526355982707	-3.48779	0.415019606620809	-8.40393	4.317969262626e-17	2.82426580690518e-16	15.549094431898	down-regulated
CACNA1E	117.408774443902	-10.1748	1.21098397958113	-8.40211	4.38511636850637e-17	2.86666371563031e-16	15.5426232505527	down-regulated
SLC47A1P2	91.8611291222489	-3.26489	0.3890868001618	-8.39117	4.8133076022281e-17	3.14324924530138e-16	15.5026211800492	down-regulated
ADGRB1	241.498061498659	-1.73949	0.207327694327427	-8.39005	4.8594875725604e-17	3.17088638535625e-16	15.4988193187098	down-regulated
CYP2E1	91.5311201491056	-3.35395	0.399752758809841	-8.39007	4.85841459056976e-17	3.17088638535625e-16	15.4988193187098	down-regulated
H2BU1	180.182477170295	-2.87039	0.342295745297151	-8.38569	5.0429069099045e-17	3.28795930026357e-16	15.4830735669776	down-regulated
CALML3	115.846985781593	-10.1525	1.21097935133783	-8.38372	5.12803924302976e-17	3.34258126438841e-16	15.4759180254283	down-regulated
IQCN	360.002065228627	-1.47363	0.176049782084149	-8.37054	5.73571706603481e-17	3.73275863547756e-16	15.427970091153	down-regulated
LRRC53	121.595011076261	-10.2293	1.22263883731406	-8.36655	5.93305557187673e-17	3.85812941065431e-16	15.4136232091985	down-regulated
PGPEP1L	114.788037354618	-10.1402	1.21289531632956	-8.36031	6.25526630233981e-17	4.06229781046578e-16	15.3912282412707	down-regulated
CHRNA9	86.3734198222465	-3.25503	0.389443050536053	-8.35816	6.3704518653116e-17	4.13601209859525e-16	15.3834181995211	down-regulated
TMEM190	137.390871573492	-2.4522	0.293605189893299	-8.35203	6.70986753994677e-17	4.35179307010702e-16	15.3613317637343	down-regulated
SSBL4P	64.5574256713651	-4.24846	0.509663659231801	-8.33582	7.69651286525806e-17	4.98383071064727e-16	15.3024367180905	down-regulated
KIF1A	205.851192541601	-1.96507	0.235739462922362	-8.33576	7.69992317132502e-17	4.98472967488194e-16	15.3023583887847	down-regulated
GOLGA6C	151.71189042815	-8.71278	1.04637435773609	-8.32663	8.31730298030671e-17	5.37170953813259e-16	15.2698874787652	down-regulated
RGS16	160.01522000997	-2.47825	0.297680741412949	-8.32521	8.41815502078788e-17	5.43542057549667e-16	15.2647668459566	down-regulated
ENSG00000283559	118.382094972939	-10.1907	1.22509934818194	-8.31827	8.9255966723915e-17	5.75552731278565e-16	15.2399148808019	down-regulated
C7orf57	109.180450078346	-10.0684	1.21130397318606	-8.31202	9.40841186242927e-17	6.06052179860482e-16	15.217489982352	down-regulated
FMO4	129.137225748223	-2.29202	0.276133103344257	-8.30041	1.03751568316489e-16	6.66931854534053e-16	15.1759185389646	down-regulated
CD74	63.169895671473	-4.53888	0.546886730061399	-8.29949	1.04557631991017e-16	6.71763029409055e-16	15.1727839013063	down-regulated
RPLP1P6	127.311	-2.77799	0.334789990795248	-8.2977	1.06142919288189e-16	6.817705175332e-16	15.1663617833205	down-regulated
TMC8	306.988401183894	-1.50818	0.181803783388364	-8.29563	1.0800987916727e-16	6.93400922195713e-16	15.1590155850848	down-regulated
CACNA1B	68.2636127497395	-4.60447	0.55558372429511	-8.28762	1.1553573117609e-16	7.40943508052279e-16	15.1302149027851	down-regulated
LPAR5	222.50606837466	-2.3359	0.28188265661236	-8.28679	1.16342310057534e-16	7.45922139801905e-16	15.1273065023117	down-regulated
LCK	106.662867730198	-10.037	1.21190599937292	-8.28197	1.21153441680439e-16	7.75961196234395e-16	15.1101599961163	down-regulated
ADAMTSL1	64.5594787115519	-4.95773	0.598948778383086	-8.27738	1.25915846278364e-16	8.06044518944228e-16	15.0936409708526	down-regulated
ABHD17AP4	109.189985817412	-10.066	1.21651095235394	-8.27445	1.29054887189282e-16	8.25495868964756e-16	15.0832850957389	down-regulated
SPN	77.4069058065063	-6.69257	0.809041887070951	-8.27221	1.31496235161108e-16	8.40239810573261e-16	15.0755967454323	down-regulated
RANP4	91.682760137194	-3.40763	0.411970293292634	-8.27154	1.32237866814625e-16	8.44759754525559e-16	15.0732667846822	down-regulated
IGFN1	178.688998631638	-1.95267	0.236135111687259	-8.26929	1.34758316109665e-16	8.60637826097272e-16	15.0651795700542	down-regulated
PSG4	216.870954281859	-1.86954	0.226218461187147	-8.2643	1.40517383948229e-16	8.96489272539272e-16	15.0474549028724	down-regulated
CPHL1P	76.1356896586001	-6.76282	0.819010723961265	-8.2573	1.49003625420727e-16	9.49402267736303e-16	15.0225497352633	down-regulated
TRPS1	128.648618780064	-2.57823	0.312316287461376	-8.25519	1.51657390825218e-16	9.65811934544888e-16	15.0151074323225	down-regulated
FLRT1	311.596440119984	-1.40711	0.170619223206645	-8.24705	1.62352094524072e-16	1.03338596287307e-15	14.9857374420435	down-regulated
PROC	219.863763100355	-1.76184	0.213746430398009	-8.24264	1.68447824357132e-16	1.07107964045706e-15	14.9701782358674	down-regulated
OR2B6	142.705298527341	-2.59043	0.314303490292672	-8.2418	1.69640590519191e-16	1.07838572395026e-15	14.9672258701139	down-regulated
GUCY2C	76.7500099372652	-6.7781	0.823248279966917	-8.23336	1.82027268908359e-16	1.15593411466483e-15	14.9370669189025	down-regulated
ZNF440	102.796737937616	-9.98306	1.21361467506839	-8.22589	1.93743095926168e-16	1.22748774113901e-15	14.9109828364614	down-regulated
TEX14	1672.95706180129	-8.3272	1.01330250024992	-8.21788	2.07126578292129e-16	1.3099241683062e-15	14.882753844985	down-regulated
CSF3	67.5524837494592	-4.99969	0.608456577872418	-8.21701	2.0864296451197e-16	1.31883752849977e-15	14.8798087031815	down-regulated
ITIH1	107.102071893006	-10.0419	1.22297453220634	-8.21107	2.19226742164779e-16	1.38290113813872e-15	14.8592088659467	down-regulated
AZIN2	284.438125225633	-1.80723	0.220353371342746	-8.20149	2.37427953743787e-16	1.49580217625654e-15	14.825125839253	down-regulated
SERHL	94.333937828797	-2.70381	0.329911591721996	-8.19556	2.49424158315843e-16	1.57057582395969e-15	14.8039410919733	down-regulated
PDE6B	91.035451055748	-7.36525	0.898951576084258	-8.19315	2.54473677494404e-16	1.60196248661697e-15	14.7953476580683	down-regulated
BST2	101.504492961092	-2.64519	0.322916051737889	-8.19159	2.5780444392678e-16	1.62251599481312e-15	14.789811013218	down-regulated
RICTOR	1654.58691304473	-1.02513	0.125259027778699	-8.1841	2.74347605160216e-16	1.72399111965578e-15	14.763464975573	down-regulated
ENSG00000279539	364.526465590677	-1.30502	0.159591858894749	-8.17721	2.90492476159296e-16	1.82219351711933e-15	14.7394055027998	down-regulated
TNNT2	65.3793362482896	-6.22608	0.761548441156776	-8.17555	2.94508444434176e-16	1.84550639862514e-15	14.7338844447069	down-regulated
SCRT1	99.009767484239	-9.93016	1.21517708812858	-8.17178	3.03865832894395e-16	1.9022093734161e-15	14.7207416826064	down-regulated
RAD9B	129.280158217261	-2.30833	0.282753671279203	-8.16374	3.24809759992633e-16	2.0312557593451e-15	14.6922353902933	down-regulated
KCNB1	289.388527063568	-1.53306	0.187826406595943	-8.16211	3.29210259241865e-16	2.05773106258379e-15	14.686611386458	down-regulated
ENKUR	91.4199226980604	-2.98124	0.365453037938236	-8.15767	3.41551921637742e-16	2.13325005629937e-15	14.6709582342337	down-regulated
ESRP2	109.448909723385	-2.67718	0.328196098747331	-8.15726	3.42705330637832e-16	2.13991180620158e-15	14.6696041251878	down-regulated
HHATL	99.0649715006743	-9.92617	1.21712636583195	-8.15542	3.47978276605775e-16	2.17173682908495e-15	14.6631928036693	down-regulated
CDK5R1	787.962995249801	-1.00259	0.122995983974058	-8.15142	3.59685961765764e-16	2.24253372014406e-15	14.6492610179105	down-regulated
ALLC	58.3683548584726	-5.73553	0.703770398391831	-8.14971	3.64790039388898e-16	2.27320628185418e-15	14.6433611524818	down-regulated
MYBPC2	96.7099816656487	-9.89553	1.21560038307867	-8.14045	3.93809852652834e-16	2.45156577969638e-15	14.6105564493989	down-regulated
CFAP251	165.701221115299	-1.9971	0.245375368331714	-8.13894	3.98745822343689e-16	2.48104038677855e-15	14.6053661661541	down-regulated
LCN15	104.532346320104	-10.0047	1.22926418224886	-8.13873	3.99429200757672e-16	2.48466531846534e-15	14.6047321019538	down-regulated
SCIN	257.66255704998	-6.11789	0.752080412024925	-8.13462	4.13246800712443e-16	2.56932159676246e-15	14.5901815325737	down-regulated
UNC79	60.4701610749203	-4.69399	0.577343703309179	-8.13032	4.28145587662072e-16	2.6592706039419e-15	14.5752374671742	down-regulated
HAND1	95.7520085038785	-9.8803	1.21623295016534	-8.12369	4.52219937949705e-16	2.80667822516015e-15	14.5518	down-regulated
YBX2	183.226470847662	-2.63497	0.324674445729609	-8.11572	4.82927444853199e-16	2.99123803279423e-15	14.5241490258802	down-regulated
NEK8	1074.86656190972	-1.0591	0.130606294623116	-8.10907	5.10074634667621e-16	3.1562148327877e-15	14.5008334435112	down-regulated
ZSCAN10	70.5005619201842	-6.56559	0.809738175829494	-8.10829	5.13358740735221e-16	3.17573894017683e-15	14.4981552057099	down-regulated
LMX1B	436.639449523726	-1.35299	0.166897050762328	-8.10674	5.19950090694633e-16	3.21570738479781e-15	14.4927234770098	down-regulated
CD93	99.6243666337176	-9.93565	1.22587228985771	-8.10496	5.27617196210122e-16	3.2623072788994e-15	14.4864751348821	down-regulated
FLT3	94.5034081758437	-9.85924	1.21658057035443	-8.10406	5.31567690550663e-16	3.28590940507898e-15	14.4833444145518	down-regulated
XKR7	94.9404767243761	-9.86817	1.21776161959191	-8.10353	5.33854415668304e-16	3.2992176121973e-15	14.4815890379983	down-regulated
DAPK2	419.671827438101	-1.40568	0.173571281865817	-8.09858	5.5606108991478e-16	3.43387224162804e-15	14.4642158669468	down-regulated
CXCL14	93.4652881933915	-9.8446	1.21586628029347	-8.09677	5.64355453240272e-16	3.48334767983955e-15	14.4580031755848	down-regulated
SLC6A20	61.2930180642741	-4.83229	0.596941645016639	-8.09508	5.72250456674939e-16	3.53030987436201e-15	14.4521871725671	down-regulated
CFAP57	123.235765227209	-2.42759	0.300136286945411	-8.08829	6.05084718824342e-16	3.72913712211442e-15	14.4283916471341	down-regulated
TRIM26	626.343464614275	-1.02835	0.127155183118208	-8.08739	6.09564725430787e-16	3.75486996784601e-15	14.4254050981338	down-regulated
NPL	315.712545192283	-1.46477	0.181182272634209	-8.08453	6.24026251394011e-16	3.84011361691592e-15	14.415655926031	down-regulated
OVGP1	351.080739730715	-1.51663	0.187622992398369	-8.08337	6.29998066793911e-16	3.87492822919249e-15	14.4117363370169	down-regulated
TNFRSF8	64.6908973054236	-5.75633	0.712409857151921	-8.08008	6.47221700931844e-16	3.97888014248673e-15	14.4002391430955	down-regulated
PIANP	118.314410985854	-2.75571	0.341069357671105	-8.07961	6.49729406947833e-16	3.99330075793517e-15	14.3986679794143	down-regulated
MATK	64.1586892113831	-4.89403	0.60593688554182	-8.0768	6.64871832804086e-16	4.08331350829256e-15	14.3889872745726	down-regulated
ZNF77	451.73798838301	-1.47008	0.182122282281929	-8.07195	6.91829095323233e-16	4.24358568248528e-15	14.3722670245337	down-regulated
GNG4	458.595813519728	-1.15836	0.143629983240825	-8.06486	7.33179351478448e-16	4.49386806878337e-15	14.3473796817701	down-regulated
SSX4B	92.4671901355801	-9.8269	1.21866983888253	-8.06363	7.40640774288742e-16	4.53847287292222e-15	14.3430902560488	down-regulated
GDF7	67.3955852488372	-4.2808	0.531157517899484	-8.05937	7.66877259547302e-16	4.69341067585901e-15	14.3285114431333	down-regulated
CCNE2	645.50112956974	-1.03412	0.128335075343736	-8.05793	7.75947252692977e-16	4.74774179036666e-15	14.3235129085187	down-regulated
ANO2	91.226596747935	-9.81214	1.21846151422479	-8.05289	8.08613779129081e-16	4.94516171746219e-15	14.3058195014676	down-regulated
ANKRD20A19P	91.4685697911531	-9.81349	1.21868105577271	-8.05255	8.10884225738826e-16	4.95781694764721e-15	14.3047095122786	down-regulated
RAC2	68.2245008598456	-6.51006	0.808531061558369	-8.05171	8.1644802141433e-16	4.98935959938177e-15	14.3019551939163	down-regulated
SHE	65.8554890438162	-4.89998	0.608775197007085	-8.04891	8.35350321899194e-16	5.09981578391751e-15	14.2924455112497	down-regulated
MLXIPL	847.078265799857	-1.10104	0.136823170849711	-8.04714	8.47498885207634e-16	5.17014167734189e-15	14.2864975557755	down-regulated
UNCX	90.0597972355713	-9.79156	1.21731410598396	-8.04358	8.72530567648034e-16	5.31495516522346e-15	14.2745003946549	down-regulated
ANKUB1	69.0923250906698	-6.52236	0.811575294790635	-8.03667	9.23145266198208e-16	5.61633196009828e-15	14.2505472306186	down-regulated
FBXO2	932.571476258988	-1.03439	0.12873108236542	-8.03526	9.3380736504313e-16	5.6797974742273e-15	14.2456671497456	down-regulated
TPH1	126.238012529501	-2.54992	0.317364172085967	-8.03468	9.38200216463103e-16	5.70510896306078e-15	14.2437360564861	down-regulated
CTBP2P10	53.3767815091835	-4.82085	0.601034937381175	-8.02091	1.04960602185648e-15	6.3684193085912e-15	14.1959683495712	down-regulated
ENSG00000259286	97.8565341298506	-9.9068	1.23559093455304	-8.01786	1.07600718225252e-15	6.52378973361759e-15	14.1855000450262	down-regulated
AGAP2	279.203287187222	-1.85226	0.231077819283405	-8.01576	1.09458066241004e-15	6.63313728852809e-15	14.178281013853	down-regulated
PGA5	84.2024340412086	-7.25886	0.905777497822472	-8.01395	1.11078143075639e-15	6.72965933423604e-15	14.172006919878	down-regulated
CDRT15P12	65.2818102131303	-3.69814	0.461805696698416	-8.00799	1.16597214342134e-15	7.05709434805371e-15	14.1513740763359	down-regulated
MEGF11	92.2790938391443	-2.61345	0.326483989261222	-8.00482	1.19637355967655e-15	7.23222192083037e-15	14.140728255996	down-regulated
ENSG00000280266	78.8807126767173	-7.1643	0.895104519660302	-8.00387	1.2057250984285e-15	7.28518017805376e-15	14.1375597027318	down-regulated
TCTE1	88.8947520834383	-9.77378	1.22174388900773	-7.99986	1.24558122313966e-15	7.52230972876993e-15	14.1236487886049	down-regulated
KCNJ10	73.171149531868	-4.68825	0.586346959031478	-7.99569	1.28854673503798e-15	7.7760719980799e-15	14.1092397269624	down-regulated
ANKK1	86.9272626088162	-3.01058	0.376699660789912	-7.99199	1.327825505043e-15	8.00918873264496e-15	14.0964114722777	down-regulated
PIK3CG	88.5873104671337	-9.76952	1.22266075055636	-7.99037	1.34529167377656e-15	8.11255634587567e-15	14.0908422737826	down-regulated
PGA3	86.6095040680417	-9.73493	1.21917	-7.98487	1.40674154892485e-15	8.47068702102965e-15	14.0720813644813	down-regulated
NUTM1	57.7123438000329	-3.91367	0.490321237833936	-7.98186	1.44148389340946e-15	8.67564964363523e-15	14.0616979947985	down-regulated
FNDC11	74.5569411135625	-3.35672	0.420788006523615	-7.97723	1.49654742416598e-15	9.00046038071228e-15	14.0457352754841	down-regulated
PAX5	92.3159912813239	-9.83086	1.23269931909611	-7.97507	1.5229440842559e-15	9.15251525233459e-15	14.0384595387098	down-regulated
FBXO48	320.732647842126	-1.44151	0.180812088449562	-7.97244	1.55569545470133e-15	9.34478663481898e-15	14.0294306102165	down-regulated
ZSCAN18	145.164307429491	-2.02768	0.254396542977937	-7.97055	1.57970229046191e-15	9.48667986954127e-15	14.0228857545513	down-regulated
CCDC62	84.0885722188343	-3.13124	0.393454065324514	-7.95833	1.74375566766549e-15	1.04565956505205e-14	13.9806096855302	down-regulated
PTPN7	85.6054781805304	-9.71556	1.22234462706933	-7.9483	1.89091832055716e-15	1.13225451635597e-14	13.9460559383204	down-regulated
LIMS2	235.965187261696	-1.68208	0.211876846903568	-7.93894	2.03909509146775e-15	1.21861265926941e-14	13.9141343146226	down-regulated
FRMPD3	107.036568874145	-3.07457	0.38759036138282	-7.93251	2.14756828853706e-15	1.28157476274547e-14	13.8922560534667	down-regulated
FCAMR	83.4641731214967	-9.68172	1.22055765430501	-7.93221	2.15278581424004e-15	1.28437744173876e-14	13.8913073308028	down-regulated
DES	83.4190081001585	-9.67953	1.22145349075841	-7.9246	2.28878052533975e-15	1.36452279348671e-14	13.865	down-regulated
APOL4	85.3575773076123	-9.71381	1.2258681964051	-7.92402	2.2994586874877e-15	1.37055743626564e-14	13.8631027596644	down-regulated
SYCE1L	272.589078631219	-1.53684	0.193973714515349	-7.92293	2.31978759703688e-15	1.38233995267472e-14	13.8593851397295	down-regulated
ARHGAP31	397.394257192681	-1.22364	0.154563084656049	-7.91679	2.4371443518029e-15	1.45121938552283e-14	13.8382669288994	down-regulated
GPR4	68.2721344432105	-6.51878	0.823901543960245	-7.91208	2.53123414421218e-15	1.50615457695193e-14	13.8221304541166	down-regulated
HCK	85.0810844655842	-9.70591	1.22676629533464	-7.91178	2.53732077737349e-15	1.50941196437768e-14	13.8211922118889	down-regulated
CORO2B	172.099387655396	-2.03007	0.256686265288399	-7.90876	2.5996748722646e-15	1.54538666387912e-14	13.8109628398771	down-regulated
CMYA5	146.741650897896	-3.19402	0.403967814527581	-7.90663	2.64446573977167e-15	1.57125498714995e-14	13.8037533308568	down-regulated
TDRD10	82.5427143402424	-9.66554	1.22261000534851	-7.90566	2.66513192601619e-15	1.582771193451e-14	13.8005818625247	down-regulated
GPR50	84.6305907916467	-9.7047	1.2281553431667	-7.90185	2.74787788403922e-15	1.63034141028483e-14	13.7877214403342	down-regulated
ENSG00000218520	52.9887512482262	-5.01727	0.635012090866536	-7.90107	2.76520749935237e-15	1.64022847146378e-14	13.7850956537907	down-regulated
ZNF382	70.6962820031015	-4.51389	0.571386042562273	-7.8999	2.79137469662389e-15	1.65535167238807e-14	13.7811097280798	down-regulated
TUBG1P	61.8459965575742	-3.77471	0.477927109361951	-7.89809	2.83218248546615e-15	1.67874399210655e-14	13.7750155285747	down-regulated
PGA4	84.6409519310443	-9.69809	1.22822464921007	-7.89602	2.87949406854693e-15	1.70596702181733e-14	13.7680293684681	down-regulated
HSPB7	81.9773106310107	-9.65749	1.22319101682392	-7.89533	2.89555088687039e-15	1.71506776701415e-14	13.7657187151204	down-regulated
EFEMP2	304.576363296553	-1.44516	0.18308364748782	-7.89345	2.93941257005569e-15	1.73979348564256e-14	13.7595022996304	down-regulated
CALCR	57.0837973143054	-4.6131	0.584859179399361	-7.88754	3.08213271252472e-15	1.82251704555432e-14	13.7393284011414	down-regulated
TTBK1	80.8535188889654	-9.63745	1.22222045308661	-7.8852	3.14036762004336e-15	1.85561703186263e-14	13.731511649944	down-regulated
TSKS	78.5263840965425	-7.13873	0.906738693425242	-7.87297	3.46312753865302e-15	2.04486275647603e-14	13.6893358348964	down-regulated
PRSS36	153.047992700856	-2.25359	0.286260641438164	-7.87252	3.47578136051719e-15	2.05184296215205e-14	13.6878558810264	down-regulated
WDR86	158.391584406243	-1.99353	0.25325074873647	-7.87175	3.49709017629931e-15	2.0639278675157e-14	13.6853054849941	down-regulated
TNNC2	68.4993199039297	-4.69716	0.596889668743359	-7.86939	3.56384226342392e-15	2.10181434157719e-14	13.6774056489118	down-regulated
AMY2B	302.558698161122	-1.91254	0.24305553359031	-7.86875	3.5818901962087e-15	2.11144804201188e-14	13.6754196011181	down-regulated
HTR7	80.3306571670231	-9.62578	1.22349461262422	-7.86744	3.61958923700898e-15	2.13316074278617e-14	13.6709764173707	down-regulated
RAPGEF3	312.363517745464	-1.5396	0.195761576957937	-7.86466	3.70087906995585e-15	2.17950479771982e-14	13.6616421706376	down-regulated
HAPLN2	52.2577507377781	-4.99897	0.635954697833996	-7.86058	3.82362882436279e-15	2.25071866710104e-14	13.6476787870792	down-regulated
FGF4	80.1284462082173	-9.62588	1.22524176523654	-7.85631	3.95619567923293e-15	2.32652995907562e-14	13.6332913506195	down-regulated
KIAA1210	82.3333033989614	-9.66157	1.2299336230086	-7.85535	3.98641913185003e-15	2.34374444164958e-14	13.6300897448861	down-regulated
PLA2G4D	81.4884833060959	-9.64335	1.22813779933127	-7.85201	4.09424197645728e-15	2.40598934931168e-14	13.6187062995005	down-regulated
TMEM132B	314.342298341008	-5.4307	0.691795998679666	-7.85015	4.15535707663098e-15	2.43957758164103e-14	13.6126853662204	down-regulated
RELN	70.1808326024915	-4.86425	0.619689573893012	-7.84949	4.17732897784812e-15	2.45189318956933e-14	13.6104984526655	down-regulated
SLC9A3P2	82.7749895632486	-9.67134	1.23211876108035	-7.84936	4.18166455290822e-15	2.45385371478918e-14	13.6101513310766	down-regulated
PDLIM3	79.2891103869345	-9.61011	1.22443234688417	-7.84862	4.20632968575655e-15	2.46715297200263e-14	13.6078039219181	down-regulated
NFAM1	78.0003661322736	-9.58426	1.22305713360418	-7.83632	4.63958865003642e-15	2.71610399906668e-14	13.5660536050263	down-regulated
CYTH4	110.922474093642	-2.4172	0.308483011243219	-7.83577	4.65987502003464e-15	2.72668499866826e-14	13.5643650311973	down-regulated
AEBP1	79.7819078446764	-9.61544	1.22713852849661	-7.83566	4.66399416774209e-15	2.72844765598429e-14	13.5640843735412	down-regulated
BNIP5	82.3203815295869	-9.66682	1.23419311529248	-7.8325	4.7824731877515e-15	2.79576782130543e-14	13.5534988980597	down-regulated
PDE6G	118.479237631754	-2.70981	0.345991203352412	-7.83201	4.80141569531556e-15	2.80551077793124e-14	13.5519880585281	down-regulated
C10orf105	122.987385115945	-8.39802	1.07256342311388	-7.82986	4.88417803002846e-15	2.85251733703534e-14	13.5447717073459	down-regulated
DCHS2	54.924095603499	-5.67753	0.725218979310908	-7.82871	4.92898241201159e-15	2.87800271011155e-14	13.5409088014397	down-regulated
MT-RNR2	1933099.33139363	-1.35364	0.173030070456026	-7.82317	5.15090148692405e-15	3.00473316269881e-14	13.5221940897554	down-regulated
TMEM225B	440.296537112701	-1.43554	0.183516928957703	-7.82238	5.18342850046251e-15	3.02299217869415e-14	13.5195629764591	down-regulated
ENSG00000279717	80.3944743512791	-9.63057	1.23271051664533	-7.81251	5.60591290512005e-15	3.25936238059008e-14	13.4868673513663	down-regulated
GABRQ	389.869083752187	-1.37553	0.176143546967866	-7.80915	5.75767625621943e-15	3.34286940810931e-14	13.4758805891404	down-regulated
GNLY	54.9018336896138	-4.79726	0.614580117936984	-7.80576	5.91454112738663e-15	3.4331355750491e-14	13.4643090458801	down-regulated
RFLNA	53.8365122584281	-4.64533	0.595246917635672	-7.80405	5.99529582133874e-15	3.47837214845005e-14	13.4586239550038	down-regulated
H2AC12	56.7860370505247	-4.39376	0.563206706470849	-7.80133	6.12557132147163e-15	3.5522837971517e-14	13.4494923450856	down-regulated
ZNF585A	678.34305471723	-1.03862	0.133151984710358	-7.80024	6.17880234956748e-15	3.58231033681885e-14	13.4458367937718	down-regulated
ZNF844	76.593710160383	-9.55654	1.22591687534024	-7.79542	6.41922433338544e-15	3.71820296679083e-14	13.4296669069387	down-regulated
ESR2	117.984708562195	-2.4121	0.309626175738152	-7.79038	6.68094505254688e-15	3.86889023808752e-14	13.4124135912064	down-regulated
PARM1	542.892316541788	-1.05301	0.135440857104689	-7.77469	7.56304598411267e-15	4.36433074907176e-14	13.3600823440017	down-regulated
IFITM3P2	108.852479854837	-8.22644	1.0587725039451	-7.76979	7.86180324072041e-15	4.53036871178681e-14	13.3438664507514	down-regulated
SIGLEC1	73.4458516304351	-7.04448	0.907155321725415	-7.76546	8.1351227581967e-15	4.68349010357462e-14	13.3294303931167	down-regulated
SCG2	209.805802118815	-1.72165	0.221904359309492	-7.75851	8.59340107590088e-15	4.94386285468164e-14	13.3059335853062	down-regulated
PADI3	311.27853953093	-1.44012	0.185706703582099	-7.75482	8.847114101199e-15	5.08389409843258e-14	13.2938035047241	down-regulated
MARCHF3	234.662467790343	-1.58821	0.204838816973003	-7.75348	8.94083158487684e-15	5.13535368663523e-14	13.2894296399218	down-regulated
CD300LG	66.8067549309728	-6.46296	0.83356151658481	-7.75343	8.94405080050395e-15	5.13600606415149e-14	13.2893744721616	down-regulated
GLIPR2	559.857181023012	-1.10802	0.14294927329647	-7.75116	9.10535576432904e-15	5.22719674952507e-14	13.2817311529298	down-regulated
C7orf61	126.075568609963	-2.98014	0.384554891255505	-7.74957	9.22008619854761e-15	5.29081855136396e-14	13.2764771323429	down-regulated
NLRC3	182.046466526393	-2.40295	0.310181266324942	-7.74692	9.41463324394514e-15	5.39994273452154e-14	13.2676108457721	down-regulated
H2BC13	79.6946903803873	-3.00357	0.388223099721205	-7.73672	1.02012798510726e-14	5.84434001600375e-14	13.2332645253218	down-regulated
ATP4A	55.5959309924079	-4.41959	0.571270438014481	-7.73643	1.02249035198525e-14	5.85612032319933e-14	13.232390008595	down-regulated
N4BP2L1	139.593972435792	-2.22593	0.28772112431557	-7.73641	1.0226593376348e-14	5.85612032319933e-14	13.232390008595	down-regulated
ELOA2	74.9320372739145	-9.52945	1.23209819459391	-7.73433	1.03949994782101e-14	5.94979166790885e-14	13.2254982408364	down-regulated
PYY2	124.025021049932	-2.44104	0.31565139718046	-7.73335	1.04754404878724e-14	5.99305079849223e-14	13.2223520411069	down-regulated
U2	50.0429435921239	-4.44959	0.575480530880225	-7.73196	1.05905299669879e-14	6.05748827717367e-14	13.2177074176632	down-regulated
ZNF705A	61.9888428408757	-6.36193	0.823263051552254	-7.7277	1.09503239290973e-14	6.25892384651305e-14	13.203500332556	down-regulated
PSG3	73.4364828871097	-9.49417	1.22871528099284	-7.72691	1.10190827442111e-14	6.29530539537177e-14	13.2009831967225	down-regulated
ENSG00000279865	110.583100950482	-2.42095	0.313317985673337	-7.7268	1.10279748563072e-14	6.29892576825032e-14	13.2007335097053	down-regulated
CFAP61	68.1925715254501	-3.29765	0.426784981958624	-7.72672	1.10350431518738e-14	6.30150298308994e-14	13.2005558538141	down-regulated
CYGB	158.502249243654	-2.27188	0.294101493407176	-7.72482	1.12008643460268e-14	6.39175249671879e-14	13.1943800502445	down-regulated
CATSPERD	72.8101881413863	-9.48674	1.22876	-7.72058	1.15801837721322e-14	6.60209737166054e-14	13.180318074725	down-regulated
IGFL3	73.3885760240644	-9.49332	1.22969400113195	-7.72007	1.16268859752455e-14	6.62719059102318e-14	13.1786705393773	down-regulated
ENSG00000267218	56.3490045884335	-4.59258	0.595663230499126	-7.71003	1.25790860563128e-14	7.16165426005136e-14	13.1449866490566	down-regulated
ENSG00000279568	79.4345723882506	-3.37075	0.437206700561163	-7.70974	1.26070439209629e-14	7.17591426320892e-14	13.1441227588209	down-regulated
STYK1	127.434102810895	-2.60036	0.337482076210244	-7.70518	1.30657230903647e-14	7.42670522535558e-14	13.1292038133999	down-regulated
NEUROD2	72.036845785964	-9.47241	1.2300155323329	-7.70105	1.34951406738922e-14	7.6654886611242e-14	13.1154601544345	down-regulated
CHST1	73.4466710840692	-4.07843	0.529710199224119	-7.69935	1.36756004238792e-14	7.76441505411031e-14	13.1098912570431	down-regulated
SDR9C7	51.1490965057249	-5.5421	0.719904717781521	-7.69839	1.37795226176074e-14	7.82161620007503e-14	13.1067034983147	down-regulated
EFCAB8	61.117230852511	-6.44811	0.837690064630212	-7.69748	1.38771583257291e-14	7.87522345869874e-14	13.1037371142999	down-regulated
LPL	71.1603893567343	-9.45046	1.2277866233117	-7.69715	1.39135842814832e-14	7.89226138304473e-14	13.1027985398245	down-regulated
CD300LB	73.2537875527227	-9.48952	1.23314743522366	-7.69537	1.41087378443877e-14	7.99743861439054e-14	13.0970490847273	down-regulated
NKG7	80.694549482033	-2.71704	0.353130774921785	-7.69414	1.42450479264922e-14	8.07284876974448e-14	13.0929731831639	down-regulated
CPLX4	73.5766769015357	-9.50371	1.23526943368028	-7.69363	1.43018343478115e-14	8.10316755555618e-14	13.0913451807521	down-regulated
EPHA8	71.3981889304832	-9.45583	1.22920485888627	-7.69264	1.44133957864595e-14	8.16449983749538e-14	13.0880704152714	down-regulated
SYNPO2L	72.0172678574734	-9.47262	1.23180393219288	-7.69004	1.47094779934229e-14	8.33030212483028e-14	13.0793392472406	down-regulated
KDM7A	503.252411769829	-1.17873	0.153289745097404	-7.68953	1.47676979932587e-14	8.35943262755028e-14	13.0778231980497	down-regulated
RGL2	710.01255241862	-1.14756	0.149267784704626	-7.68793	1.4953643211352e-14	8.4549819368406e-14	13.0728873158887	down-regulated
CCDC148	67.9959973756529	-3.25656	0.423727976808545	-7.68549	1.52417444185885e-14	8.6119524044704e-14	13.0648983790498	down-regulated
CLSTN2	76.0680113956171	-3.20018	0.41641064773134	-7.68514	1.52825733735996e-14	8.63304305238264e-14	13.0638360932872	down-regulated
ZNF606	559.191031593717	-1.14161	0.148634746948273	-7.68066	1.58265786498436e-14	8.93420693556088e-14	13.0489439925479	down-regulated
NEFM	416.005531318156	-7.19453	0.936988204868306	-7.67835	1.6114485872444e-14	9.08840781806199e-14	13.0415121933892	down-regulated
KRT18P59	88.2137088643715	-3.80395	0.495604872307334	-7.67537	1.64940129328945e-14	9.30032952474191e-14	13.0315016634631	down-regulated
SLC12A8	156.027313073556	-1.94739	0.253720966422549	-7.67532	1.65004478600389e-14	9.30183033719822e-14	13.031431586163	down-regulated
COL20A1	142.056424037185	-2.00713	0.261911856372844	-7.66337	1.81110019557664e-14	1.01864572259538e-13	12.9919768341237	down-regulated
SCGB1A1	123.285212011374	-9.28298	1.21138645416086	-7.66311	1.81487236851779e-14	1.02053452620211e-13	12.9911722978706	down-regulated
FAM184B	57.032188097668	-5.1786	0.675867421218608	-7.66215	1.82851096562547e-14	1.02796926623943e-13	12.9880198694868	down-regulated
MTTP	88.5649341541827	-4.06789	0.53096581853135	-7.6613	1.84064462910454e-14	1.03431892857728e-13	12.9853455274271	down-regulated
PRDM7	49.9944124327242	-5.08501	0.663907676527435	-7.65922	1.87067591363738e-14	1.05023690783395e-13	12.9787127236352	down-regulated
LDB3	97.5756677316497	-3.67053	0.479244424704636	-7.65899	1.87406624872097e-14	1.0519007550881e-13	12.9780252331393	down-regulated
MCHR1	70.2149568102931	-9.43033	1.23166077434024	-7.6566	1.90921304497121e-14	1.07065332085146e-13	12.9703511316093	down-regulated
MMP10	54.7819067415027	-5.84692	0.763855534465459	-7.65448	1.9409788557914e-14	1.08821948494359e-13	12.9632835021687	down-regulated
DCAF4L1	138.038814798011	-2.32237	0.303596516850696	-7.64954	2.01693851719251e-14	1.12952222457587e-13	12.9471052194442	down-regulated
SSX4	73.927529767116	-9.51235	1.24622182024122	-7.63295	2.2943311527026e-14	1.28166443635677e-13	12.8922256663264	down-regulated
RSPH10B2	67.389195605576	-3.47735	0.455593209673152	-7.63257	2.30123309050506e-14	1.28493767037669e-13	12.8911179385335	down-regulated
PDYN	68.9269598156334	-9.40598	1.23272857607292	-7.63021	2.34367573062239e-14	1.30833999346248e-13	12.8832793828486	down-regulated
COL13A1	69.4369561717877	-9.41416	1.23479043225198	-7.6241	2.45751638307578e-14	1.37033915122335e-13	12.8631719341017	down-regulated
ROR2	56.5284433755176	-5.37822	0.705620554587192	-7.62198	2.49819860442964e-14	1.39239412155549e-13	12.8562378188992	down-regulated
TACSTD2	69.1433273235875	-9.4136	1.23552118209973	-7.61913	2.5538631998249e-14	1.42277594580979e-13	12.8468634858326	down-regulated
NLGN3	297.440643929447	-1.82724	0.23991139904049	-7.6163	2.61040762683694e-14	1.45329197869883e-13	12.8376471234867	down-regulated
CYP1A2	67.1079	-9.36689	1.23019379568688	-7.61416	2.65415998702237e-14	1.47698311512586e-13	12.8306244695151	down-regulated
PARD6G	489.90662617909	-1.15444	0.151745271805303	-7.60776	2.78880745230067e-14	1.54981247326682e-13	12.8097208481216	down-regulated
AVPR1B	67.404167535319	-9.37382	1.23220545468927	-7.60735	2.79769620362679e-14	1.55440177624087e-13	12.8084367161324	down-regulated
ACTG1P25	74.6844269206684	-3.82188	0.502591696568675	-7.60435	2.86336669291184e-14	1.58981341697438e-13	12.7986538421785	down-regulated
VN1R96P	67.3590025139808	-9.37114	1.2326394257579	-7.6025	2.90467204517281e-14	1.61202105487619e-13	12.7926292901011	down-regulated
C4orf54	69.085499684935	-9.40654	1.23761494438097	-7.60054	2.94897194530233e-14	1.63586985588643e-13	12.7862512502482	down-regulated
ZKSCAN8P2	57.7331122625723	-6.36308	0.837235083798633	-7.60011	2.9587781573037e-14	1.64094036296627e-13	12.7849072023139	down-regulated
NIPAL1	146.557926703189	-2.03613	0.267983437348199	-7.59796	3.00844822374107e-14	1.66698731426534e-13	12.7780677051303	down-regulated
CHRNA7	173.89734534623	-1.94419	0.255892132071658	-7.59769	3.01470752187171e-14	1.66970500627233e-13	12.7773602506876	down-regulated
POU3F1	68.1654694467667	-7.00955	0.923945255500215	-7.58655	3.28543729967956e-14	1.81801571967903e-13	12.7404023659213	down-regulated
PI3	58.6750700472207	-4.73005	0.623513131340703	-7.58613	3.29609767275946e-14	1.82350538215588e-13	12.7390929505092	down-regulated
TKTL2	53.9274098895542	-5.95789	0.78577193468728	-7.58221	3.39723830639317e-14	1.87819508251187e-13	12.7262593008568	down-regulated
BIVM-ERCC5	322.665329861899	-10.6691	1.40720425617482	-7.58175	3.40932315710759e-14	1.88403125911267e-13	12.7249118958385	down-regulated
TMEM38A	248.883409533199	-1.67087	0.2205067552869	-7.57742	3.5248883315003e-14	1.94614887229889e-13	12.7108239410744	down-regulated
CSMD2	58.7712874850546	-6.27813	0.828771052444302	-7.57522	3.58509600301621e-14	1.97850429071761e-13	12.7036630035567	down-regulated
ADGRG5	206.115229070008	-3.13048	0.413378645814492	-7.57291	3.64956816519336e-14	2.01363371549567e-13	12.6960195257418	down-regulated
ENSG00000284128	218.186488752982	-1.70654	0.225391773463499	-7.57145	3.69083815476739e-14	2.0354931138999e-13	12.6913303625061	down-regulated
CEACAMP10	65.934463275917	-9.34425	1.23434846147405	-7.57019	3.72676427155017e-14	2.05438713824362e-13	12.6873177125595	down-regulated
MYO3B	68.7820916818661	-9.4075	1.24464540379459	-7.55838	4.08122286147244e-14	2.24426290388174e-13	12.648926269066	down-regulated
ENSG00000257943	64.7414920800183	-9.31355	1.23299627159835	-7.55359	4.23425926079144e-14	2.32737924854026e-13	12.6331328422706	down-regulated
SLC4A1	56.7787920050738	-6.24651	0.827646651119294	-7.54732	4.44308888813393e-14	2.44107482215907e-13	12.6124189086808	down-regulated
FSD2	64.2255678941641	-9.30467	1.23293429666899	-7.54677	4.46200428279384e-14	2.45092089080735e-13	12.6106707063898	down-regulated
MAGEA11	64.5778714180913	-9.31178	1.23408483188379	-7.54549	4.50572906683588e-14	2.4727344825387e-13	12.6068225148393	down-regulated
CILP2	91.0585040909135	-2.69144	0.356770137791005	-7.5439	4.56105240545717e-14	2.50086885897087e-13	12.6019090812877	down-regulated
TMEM236	72.7955754812367	-2.89627	0.384243946780142	-7.53759	4.78721171146803e-14	2.62254095802466e-13	12.581277720406	down-regulated
GPR83	67.8846990821291	-3.04778	0.404524728026332	-7.53422	4.91245368979027e-14	2.68836668703764e-13	12.5705114948087	down-regulated
SNX31	63.9575636118129	-9.29553	1.23423271025098	-7.53142	5.01907753689799e-14	2.74285744712058e-13	12.5617967631347	down-regulated
TMEM102	462.214776040734	-1.10641	0.146917957193333	-7.53081	5.0425144197132e-14	2.75444417183181e-13	12.5599660256545	down-regulated
ENSG00000280422	54.7777206793207	-4.83841	0.643066816745747	-7.52397	5.3139019896461e-14	2.89883407498906e-13	12.5377766423128	down-regulated
TNR	63.2057346568423	-9.27986	1.23371739799338	-7.52187	5.39991875185571e-14	2.94315270994355e-13	12.5311872032877	down-regulated
SOCS6P1	49.3489281816218	-4.9137	0.653830780028837	-7.51524	5.68055612762928e-14	3.09337463349496e-13	12.5095674801239	down-regulated
KLF18	63.3032023779219	-9.28552	1.23572702344879	-7.51421	5.72545597198112e-14	3.11644823628347e-13	12.5063400822753	down-regulated
RASA4CP	116.471260538831	-2.84178	0.378232030240144	-7.51333	5.76406292465186e-14	3.13607766979735e-13	12.5036131898822	down-regulated
RPL7P38	62.702835311763	-9.26937	1.23390766183185	-7.51221	5.81391867189852e-14	3.16180726008476e-13	12.500064607659	down-regulated
RNVU1-14	63.2399100864401	-9.27845	1.23625127122885	-7.50531	6.12838047710328e-14	3.32915018778207e-13	12.4776666120966	down-regulated
KRT14	62.2951434653433	-9.25789	1.23684388384733	-7.48509	7.1498826928566e-14	3.87041959034477e-13	12.4122419507709	down-regulated
ENSG00000285791	136.949851472702	-2.49301	0.333131823163781	-7.48357	7.23313854960952e-14	3.91462857354498e-13	12.4073094382324	down-regulated
SLC39A5	72.1726122154056	-3.31004	0.442516810625715	-7.48002	7.43096893045863e-14	4.01993078941554e-13	12.3957814240383	down-regulated
TTYH1	54.6777667811659	-3.76117	0.503038779205572	-7.47689	7.61008554188093e-14	4.11321703088026e-13	12.3858183746564	down-regulated
SLC25A47	53.3252256805751	-5.29482	0.708191231098507	-7.47654	7.63048235538208e-14	4.12333737450414e-13	12.3847511294501	down-regulated
GNG7	79.6213334416682	-3.16505	0.42333390700647	-7.47648	7.63389721251148e-14	4.12427863429395e-13	12.3846520016697	down-regulated
C22orf42	54.4807778558811	-6.28212	0.840550617018283	-7.47381	7.79028688849141e-14	4.20600421320829e-13	12.3761302966111	down-regulated
MYH7	60.8231815896798	-9.22574	1.23544286439367	-7.46756	8.1695747569592e-14	4.40499468303933e-13	12.3560546114581	down-regulated
ANKRD33	64.2110892007154	-9.29778	1.24558425359838	-7.46459	8.35571607235773e-14	4.50339118093054e-13	12.3464603270009	down-regulated
PNMA6E	61.9182002508849	-9.24701	1.23981201674342	-7.45839	8.75834917516584e-14	4.71421012808271e-13	12.3265910634254	down-regulated
POU4F1	370.313	-1.31891	0.177198222105511	-7.44316	9.83043855835876e-14	5.27973793770501e-13	12.2773876333437	down-regulated
KCNK4	95.5937521661329	-3.78839	0.509050185071519	-7.44207	9.91209225848066e-14	5.32243298532052e-13	12.273889798051	down-regulated
PRRT4	84.8545412429375	-2.60449	0.350123871940629	-7.43875	1.0163954063915e-13	5.45648509546238e-13	12.2630870267465	down-regulated
CD177	51.9930728212576	-5.6525	0.760657435416205	-7.43108	1.07716303484838e-13	5.77391240162691e-13	12.2385298092635	down-regulated
C9orf57	59.4519922307471	-9.19149	1.23693130225802	-7.43088	1.07876027392516e-13	5.78121701582673e-13	12.2379807277349	down-regulated
OAZ3	195.063668265714	-1.63272	0.219775878225041	-7.42902	1.09406221777813e-13	5.85812810440193e-13	12.2322411354836	down-regulated
CTXND2	59.7952226043101	-9.19824	1.23858587895415	-7.4264	1.11589179852487e-13	5.97371652925843e-13	12.2237553898169	down-regulated
H1-3	66.2335464644293	-3.23306	0.435477750363769	-7.42417	1.13487370339458e-13	6.07269514566599e-13	12.2166185202735	down-regulated
POPDC2	101.665752266349	-2.80342	0.377642371956775	-7.42348	1.14078626517078e-13	6.102493531146e-13	12.2144926722777	down-regulated
HVCN1	118.843536960359	-2.38107	0.320996247773602	-7.41774	1.19133125252547e-13	6.36650727016214e-13	12.1960987606482	down-regulated
SLC32A1	58.851706499245	-9.17779	1.23748619143267	-7.41648	1.20275862857788e-13	6.42339811778637e-13	12.1922351598792	down-regulated
ENSG00000243116	48.9037582790074	-5.73942	0.774156442852131	-7.41377	1.22757322272363e-13	6.55308252199716e-13	12.1835543630034	down-regulated
SLC6A1	54.8473522787316	-6.17796	0.833774476695807	-7.40962	1.26658417003271e-13	6.75548095189236e-13	12.1703437262397	down-regulated
CHRNA2	58.9540733130514	-9.18107	1.23940096853902	-7.40766	1.28544183586733e-13	6.85309518551071e-13	12.1641132360427	down-regulated
NKAIN1	168.259218529044	-2.04428	0.275998489093035	-7.40686	1.29326611864841e-13	6.89331813122607e-13	12.1615716780635	down-regulated
IL36G	49.9189508571378	-5.19602	0.701607194546576	-7.40588	1.30279304163372e-13	6.93959681554763e-13	12.1586657609384	down-regulated
LRRC15	446.495299700162	-7.35679	0.993397623140633	-7.40568	1.3047891157821e-13	6.94872786395771e-13	12.1580946964506	down-regulated
KISS1	53.3459597835777	-4.55186	0.614787912953528	-7.40395	1.32197103529035e-13	7.03111757539973e-13	12.1529756396666	down-regulated
SDR42E2	58.1580267390591	-9.16064	1.23795359536004	-7.39983	1.36363184732229e-13	7.24176051275079e-13	12.1401558415337	down-regulated
MAP4K1	106.835746655351	-2.52984	0.341892655472845	-7.3995	1.36696467928114e-13	7.25789646212335e-13	12.1391892315404	down-regulated
ATOH7	54.8947054479347	-4.07082	0.550453353763827	-7.39539	1.40994724956839e-13	7.48288904119698e-13	12.1259306945943	down-regulated
PRDM1	172.994296958321	-1.71439	0.231911800886409	-7.39243	1.4416925328466e-13	7.64807495582838e-13	12.1164478643586	down-regulated
COL6A3	59.2538508939911	-3.48231	0.471441093728462	-7.38653	1.50707509882918e-13	7.98118481983605e-13	12.0979326321428	down-regulated
VAMP5	70.0407395776102	-2.94589	0.398884934103489	-7.38532	1.52085976766149e-13	8.05245596915614e-13	12.0940716412248	down-regulated
ACAN	57.2163231423084	-6.24932	0.846652647038602	-7.38121	1.56854210548348e-13	8.301352508454e-13	12.0808511438763	down-regulated
TAF7L	70.1794738682614	-3.68953	0.500010353956855	-7.3789	1.5960240407755e-13	8.44136122145409e-13	12.0735875150688	down-regulated
ENSG00000286190	107.222145905252	-2.53142	0.343540985736881	-7.3686	1.72429687871627e-13	9.1061196774022e-13	12.0406666462644	down-regulated
ALG1L13P	85.7147811475903	-2.61647	0.35513626810011	-7.36751	1.73843593088733e-13	9.17882256762356e-13	12.0372130252454	down-regulated
TFAP2E	162.878197687867	-2.17504	0.295285743960644	-7.36588	1.75976789634573e-13	9.2894642785257e-13	12.0320093309567	down-regulated
P2RX5-TAX1BP3	1351.98889228832	-1.28165	0.17406062806986	-7.36325	1.79483409125193e-13	9.47254335635677e-13	12.0235333982585	down-regulated
RAB44	66.3900729144417	-3.69613	0.502019413169073	-7.36252	1.80475676676528e-13	9.52287324792333e-13	12.0212319962111	down-regulated
PRSS57	54.5102987418039	-6.1789	0.839414676323484	-7.36096	1.82588243048607e-13	9.62816121419091e-13	12.0164566464976	down-regulated
TRPC2	58.9607077354241	-9.18499	1.24785920912408	-7.3606	1.83086424434168e-13	9.65236641392453e-13	12.0153662001776	down-regulated
BGN	57.6842817288654	-9.14517	1.24318746166044	-7.35623	1.89182900316204e-13	9.96524969785272e-13	12.0015118147717	down-regulated
CCDC144NL	56.5136525280763	-9.12033	1.2401165554766	-7.35441	1.91771678319479e-13	1.00929876471644e-12	11.9959802582807	down-regulated
MAB21L4	56.4946185229447	-9.11768	1.24000714500338	-7.35293	1.93913733693602e-13	1.02013686790753e-12	11.9913415566799	down-regulated
PIK3IP1	142.386743349461	-2.19963	0.299266746207164	-7.35007	1.98106527291285e-13	1.0417495970104e-12	11.9822366588728	down-regulated
MYBPHL	56.2658920995601	-9.112	1.24020557107359	-7.34717	2.0245261474664e-13	1.06346939244282e-12	11.9732750049474	down-regulated
MYH6	57.1602317949631	-9.13367	1.24337376637187	-7.34588	2.0441616859075e-13	1.0735550464634e-12	11.9691756822362	down-regulated
GRM8	51.5593848951196	-5.28188	0.719294538959847	-7.34314	2.08640864446627e-13	1.0950424931527e-12	11.9605690276881	down-regulated
GABRR2	136.011315519726	-2.26311	0.308484508542215	-7.33622	2.19703599357782e-13	1.15163366603615e-12	11.9386856477536	down-regulated
ENSG00000279491	94.286622657661	-2.56068	0.349085018428749	-7.3354	2.21063668818734e-13	1.15827025796375e-12	11.9361900953165	down-regulated
CYP21A2	57.4691462945265	-9.1474	1.24786536331751	-7.33044	2.29405528564798e-13	1.20019208195658e-12	11.9207492427373	down-regulated
CRB2	53.5540310756444	-6.14014	0.837913864915233	-7.32789	2.33802894860257e-13	1.22293846044877e-12	11.9125953965696	down-regulated
ALOX12	197.643710705444	-1.59468	0.217625170402849	-7.32766	2.34200349748418e-13	1.22475753542597e-12	11.9119498798293	down-regulated
MYL4	55.5131157422733	-9.0946	1.24155489666622	-7.32517	2.38598567916436e-13	1.24722898563952e-12	11.904053804685	down-regulated
ENSG00000179342	53.363598899465	-6.25728	0.854317313265259	-7.32431	2.40137139881982e-13	1.25447356905501e-12	11.9015384845562	down-regulated
SCN11A	56.5348844515561	-9.12362	1.24567338585337	-7.32425	2.4024495699402e-13	1.2547709067408e-12	11.9014355594582	down-regulated
ALOX12B	161.411504920954	-1.95489	0.266933966119331	-7.32351	2.41572439956962e-13	1.26143693916946e-12	11.899134455535	down-regulated
ENSG00000159239	49.2835408766282	-5.58013	0.762849158057728	-7.31486	2.57652350033583e-13	1.34255881061676e-12	11.8720666809976	down-regulated
SLC30A2	59.3423657365522	-9.18455	1.25672121963928	-7.30834	2.70463127326607e-13	1.40871688460924e-12	11.8511762799968	down-regulated
MEIOSIN	63.4557973243057	-3.93625	0.538640447642781	-7.30775	2.71646469861993e-13	1.4142827402403e-12	11.8494637586783	down-regulated
MUC20	78.212	-3.6297	0.496857069773079	-7.30531	2.76624849793421e-13	1.4392899529564e-12	11.8418517062135	down-regulated
RGS22	50.0464591786076	-5.57854	0.764464511142079	-7.29732	2.93561769552764e-13	1.52516011443935e-12	11.8166845607977	down-regulated
BTK	69.2599135197251	-4.06768	0.557482267795642	-7.29653	2.95291433488402e-13	1.53349998280094e-12	11.8143162245523	down-regulated
ENPP2	45.5330858985568	-4.95983	0.679797825962957	-7.29603	2.96375067248733e-13	1.53815540164542e-12	11.8129997850368	down-regulated
ZIK1	56.2700661571976	-9.11568	1.25014894963642	-7.29168	3.06116723000857e-13	1.58704299798467e-12	11.7994113066828	down-regulated
SLC7A10	47.1599580974117	-5.00704	0.686710082814806	-7.29135	3.06869066055952e-13	1.5902745882723e-12	11.7985278807894	down-regulated
PROM1	51.5029422545934	-6.10075	0.83671772661185	-7.29128	3.07014121042364e-13	1.59069191087355e-12	11.7984139274334	down-regulated
CNFN	695.426216529643	-1.09125	0.14969805739948	-7.28969	3.10665095114991e-13	1.60859397705834e-12	11.7935535617277	down-regulated
CXCR2	57.4332978393548	-9.1471	1.25562335432026	-7.28491	3.21894691142099e-13	1.66534059308185e-12	11.7784969317859	down-regulated
C13orf42	79.9198167235417	-7.77328	1.06734008240917	-7.28285	3.26832121466982e-13	1.68982077567199e-12	11.7721593547143	down-regulated
C1GALT1C1L	224.062118931254	-1.98934	0.27320215850826	-7.28156	3.29980394929186e-13	1.70574055269329e-12	11.7680870253973	down-regulated
ZACN	1027.44911498399	-5.37631	0.738926081707337	-7.27584	3.44264897679367e-13	1.77846149572334e-12	11.7499555329949	down-regulated
EFHB	142.572424593495	-2.09825	0.288418952986795	-7.27502	3.46357142161526e-13	1.7888950908372e-12	11.7474151277425	down-regulated
IRS4	50.7443432874049	-3.88662	0.534286233544059	-7.27441	3.47932239422451e-13	1.79665386808594e-12	11.7455355832469	down-regulated
ENSG00000261915	177.171460379216	-8.33522	1.14630354286169	-7.27139	3.55808548942564e-13	1.83578743167269e-12	11.7361776077732	down-regulated
MAK	120.009170795712	-2.58704	0.355875343267929	-7.2695	3.60819020670112e-13	1.86124931943076e-12	11.7301954480403	down-regulated
CRYBA1	51.7497108740566	-6.2137	0.854842282580123	-7.26882	3.62629846888091e-13	1.86941676819013e-12	11.7282938661184	down-regulated
TMEM59L	210.478178582985	-1.50015	0.206391113540595	-7.2685	3.63503148526458e-13	1.87352699508138e-12	11.7273400449078	down-regulated
DUSP19	321.371660262067	-1.20705	0.166087633160574	-7.26752	3.66134928961182e-13	1.88669696253157e-12	11.7242978497392	down-regulated
ACVRL1	58.1264027233488	-4.11128	0.565812437946334	-7.26615	3.6989089303318e-13	1.90536710909036e-12	11.7200213359505	down-regulated
PHEX	244.68971250824	-1.41812	0.195180455439791	-7.26569	3.71127841810378e-13	1.91122698063703e-12	11.7186877323148	down-regulated
C2orf92	171.808634288818	-2.3426	0.322720387624721	-7.25891	3.90220554335515e-13	2.00619751939085e-12	11.6976263109175	down-regulated
IFIT1	495.001967874341	-1.30464	0.17980140206025	-7.25602	3.98641456167381e-13	2.04863647643074e-12	11.6885350988397	down-regulated
ALK	64.6907139340667	-3.67024	0.506037258983299	-7.2529	4.07954362599698e-13	2.09562220187701e-12	11.6786870091067	down-regulated
FOXN1	54.0268785098032	-9.05847	1.24928571670505	-7.25092	4.1395476896526e-13	2.12423250718809e-12	11.6727979494256	down-regulated
GTF2IP13	788.250306790303	-1.15537	0.159350751174836	-7.25046	4.15368718364222e-13	2.13060125782663e-12	11.6714978209236	down-regulated
CEP85L	350.092720478812	-1.32735	0.183072647685114	-7.25043	4.15461660080223e-13	2.13063466700596e-12	11.671491010964	down-regulated
IKZF3	54.1160768441061	-9.05362	1.24911721644598	-7.24801	4.22925158950138e-13	2.16800811362837e-12	11.663939096812	down-regulated
TIAM1	161.896616296329	-1.76677	0.24393990092039	-7.24264	4.40048009711538e-13	2.25344070116511e-12	11.6471538658138	down-regulated
C1orf210	55.2632984279792	-9.08791	1.25533958311793	-7.23941	4.50652547473215e-13	2.30582951438557e-12	11.6371728061908	down-regulated
SLC5A4	53.0761433916781	-9.03228	1.24816277204974	-7.23646	4.60535994765879e-13	2.35493328001835e-12	11.6280213927943	down-regulated
CES3	996.116281833861	-1.03397	0.142903633500906	-7.23546	4.6396000458301e-13	2.37194982019501e-12	11.6248945029313	down-regulated
PCARE	52.1275248572442	-9.00263	1.24473148490175	-7.23259	4.73875516927291e-13	2.42113559446457e-12	11.6159808874361	down-regulated
ENSG00000197376	52.8875608949195	-9.02692	1.24822017778695	-7.23183	4.76526919154165e-13	2.43367342262036e-12	11.6137377006621	down-regulated
POM121L4P	45.1147684651925	-5.6146	0.776477324673646	-7.23086	4.79955825175488e-13	2.45017001495675e-12	11.6108037793107	down-regulated
SDAD1P1	126.429914149835	-1.93381	0.267445820898993	-7.23067	4.80624124188852e-13	2.45277862527196e-12	11.6103416471305	down-regulated
CLEC3B	45.3770797846661	-4.73626	0.655175026249573	-7.22899	4.86584182170421e-13	2.48143840688151e-12	11.6053	down-regulated
TRPC7	47.1621044386762	-4.01575	0.555655556270448	-7.22705	4.93605512688736e-13	2.5158832280162e-12	11.599309520065	down-regulated
DPF1	434.607783684985	-1.23693	0.171302550420739	-7.22076	5.16988290357229e-13	2.63159102496106e-12	11.5797816034333	down-regulated
CACNA2D4	56.9384582654072	-6.75161	0.935424212811685	-7.2177	5.28754664105904e-13	2.69092898008644e-12	11.5700977641328	down-regulated
PAEP	55.728051034297	-9.09848	1.2612104943145	-7.21409	5.42976459613062e-13	2.76159597325793e-12	11.5588398592185	down-regulated
STAC2	105.982938336267	-2.2062	0.305823828027282	-7.21394	5.43548072174544e-13	2.76393297756742e-12	11.558472492349	down-regulated
ABCC11	61.5757610095546	-3.20597	0.444498758858828	-7.21255	5.49151499207636e-13	2.79185043482504e-12	11.5541078514751	down-regulated
PCSK5	303.645838663667	-1.49812	0.207728195198765	-7.21191	5.51742329899571e-13	2.80313092434558e-12	11.5523566174046	down-regulated
MLC1	51.3998054107926	-6.2013	0.860496582988688	-7.20666	5.7342073872722e-13	2.90983286354537e-12	11.5361319555242	down-regulated
INSYN2A	391.28838983814	-1.22073	0.169418226094429	-7.20544	5.78568873459885e-13	2.93474894414261e-12	11.5324290449571	down-regulated
SLC26A8	52.0410873952334	-9.00295	1.24971002589706	-7.20403	5.84587810993202e-13	2.96345028102086e-12	11.5282023546944	down-regulated
LAMP3	75.3303167115066	-3.24666	0.450859312178785	-7.20105	5.97500112854951e-13	3.02579555918247e-12	11.5191604188503	down-regulated
ELK2BP	52.0490911412962	-8.99862	1.2497194292628	-7.20051	5.99866077628957e-13	3.03652947550494e-12	11.5176224988368	down-regulated
ZBTB8B	50.0735413367649	-3.5982	0.499784925922668	-7.1995	6.04348412662904e-13	3.05859106322437e-12	11.5144785847535	down-regulated
PTX3	75.8567889627923	-2.73523	0.379964032941712	-7.19866	6.08068452523688e-13	3.07678643095524e-12	11.5119026483988	down-regulated
ESPNL	62.4131286642734	-4.50223	0.625721700317346	-7.19525	6.23443126234514e-13	3.15393391092412e-12	11.501147411331	down-regulated
CCL20	104.822505632563	-2.8741	0.399657606223147	-7.1914	6.41290334611416e-13	3.24289011873654e-12	11.4890677666014	down-regulated
CT45A1	94.8151817083788	-8.89589	1.23734499434267	-7.1895	6.50281129687812e-13	3.28700644024276e-12	11.4831994450029	down-regulated
PCDH18	51.1400129122159	-8.97304	1.24916407383061	-7.18323	6.80824928071137e-13	3.4392819931987e-12	11.4635322140968	down-regulated
RSPO4	51.5794903610034	-5.73803	0.798828142257194	-7.18306	6.81660487045631e-13	3.4427974445091e-12	11.4630885280707	down-regulated
GNGT2	50.6879439717876	-8.96427	1.24837193600879	-7.18077	6.93212905238764e-13	3.49971012491215e-12	11.4559679260396	down-regulated
H4-16	99.3972729493692	-2.36163	0.328955258507046	-7.17918	7.01315179487704e-13	3.53844081144717e-12	11.4511880645711	down-regulated
ADAM32	176.259295123344	-1.93445	0.269469993039304	-7.17873	7.03641701040312e-13	3.54945267322402e-12	11.4498386101349	down-regulated
SCNN1G	52.4162546127175	-9.00634	1.25462142524927	-7.17854	7.04620177752459e-13	3.55366133837022e-12	11.4493239625423	down-regulated
HDC	117.978994566465	-2.65742	0.370290636312027	-7.17659	7.14734237097086e-13	3.60245929521925e-12	11.4434009176511	down-regulated
HUNK	295.941453690722	-1.25346	0.174777354130139	-7.17173	7.40565480395138e-13	3.73036784280771e-12	11.4282483413214	down-regulated
SECTM1	73.148779305757	-3.23077	0.450949644244969	-7.16436	7.81480879002178e-13	3.92760829218079e-12	11.4058718317372	down-regulated
ZNF432	488.966371872265	-1.21037	0.169139420726684	-7.15607	8.30210829124024e-13	4.16236676013127e-12	11.3806596552912	down-regulated
FAM90A23P	52.8635680991478	-9.02729	1.26153769390063	-7.15578	8.31963865028529e-13	4.17030768619018e-12	11.3798319015047	down-regulated
GGT6	48.6177078820018	-6.12344	0.856648145385293	-7.14814	8.79613637962271e-13	4.4019966307442e-12	11.3563502941883	down-regulated
GTF2IRD1P1	65.1767883760634	-3.39745	0.47552545958249	-7.14462	9.02427078799974e-13	4.51341699058165e-12	11.3454945405453	down-regulated
PRF1	47.0425295108384	-5.51336	0.771884408426579	-7.14273	9.14955249803719e-13	4.57514742761892e-12	11.3396	down-regulated
ITGA8	49.2846957669485	-8.92194	1.2493906424527	-7.14103	9.26335984843524e-13	4.63111634523678e-12	11.3343143083044	down-regulated
UPK1A	98.2881770206993	-2.39706	0.335830432945536	-7.1377	9.49034599196097e-13	4.73978949339185e-12	11.3242409460661	down-regulated
SYN1	54.7894010070667	-4.37784	0.613853353887951	-7.13173	9.91118514386261e-13	4.94696368022881e-12	11.3056612781408	down-regulated
FADS6	49.5836894909046	-8.92904	1.25202837831953	-7.13166	9.91662992147053e-13	4.94867936890873e-12	11.305510683757	down-regulated
CCDC3	142.037324774364	-2.35039	0.329990225309275	-7.1226	1.05908372677677e-12	5.27871654518824e-12	11.2774716579774	down-regulated
SBK3	146.642754712869	-1.89322	0.265898344128039	-7.12008	1.07867589063003e-12	5.37419524167572e-12	11.269686559927	down-regulated
ADGRF4	378.120013252238	-1.1114	0.156121156015508	-7.1188	1.08869059385363e-12	5.42189909488479e-12	11.2658485691868	down-regulated
PTGDR2	64.273090170779	-3.33506	0.468881395981578	-7.11279	1.13719987290402e-12	5.6566285849132e-12	11.2474423361647	down-regulated
GNG3	94.3954792504739	-2.37812	0.334486910556673	-7.10975	1.16257002535116e-12	5.77932572392757e-12	11.2381228279219	down-regulated
ETV3L	50.0536829530029	-8.94281	1.25800137394567	-7.10874	1.17106319223652e-12	5.81919972082539e-12	11.2351367371245	down-regulated
LINC00672	262.780291697455	-1.52525	0.214590958804851	-7.10769	1.18000676615417e-12	5.86246005627422e-12	11.2319201033214	down-regulated
EGR2	54.3889020788542	-9.0705	1.27644034146328	-7.10609	1.19376021521868e-12	5.9283998439909e-12	11.2270625128252	down-regulated
ZNF491	48.5137921395179	-8.89645	1.25223793307707	-7.10444	1.20810339706376e-12	5.99721404438499e-12	11.2220504506392	down-regulated
PLA2G12B	53.417475287764	-6.66038	0.937558498863477	-7.10396	1.21229073318285e-12	6.01557792963438e-12	11.2207226427058	down-regulated
PKNOX2	48.5941613274269	-8.90215	1.25352011054149	-7.10172	1.23209600474314e-12	6.11016509936186e-12	11.2139	down-regulated
KRT74	49.3904487110628	-8.92144	1.25633006223326	-7.10119	1.23684579830332e-12	6.13125329173004e-12	11.2124507421131	down-regulated
EFHD1	211.589708933549	-1.86493	0.2628054146582	-7.09623	1.28204457007059e-12	6.35275632992568e-12	11.197037802401	down-regulated
GRIK3	49.0292537366699	-8.91593	1.25662345003265	-7.09515	1.29212535949793e-12	6.40013549574905e-12	11.1938108315734	down-regulated
CCDC121	533.399878466971	-1.03584	0.146068252219649	-7.09147	1.32697298782399e-12	6.56878275016806e-12	11.1825151013479	down-regulated
SIGLEC16	63.242327655902	-3.06941	0.432910227867358	-7.09017	1.33949213544998e-12	6.62809315999858e-12	11.1786	down-regulated
RNF112	114.777163766202	-2.3779	0.335467848200981	-7.08832	1.35751295573904e-12	6.71591599134636e-12	11.1728947450419	down-regulated
SOST	47.6540123220849	-8.8754	1.2523220920242	-7.08715	1.36899536231823e-12	6.7686469458221e-12	11.1694981382118	down-regulated
PILRA	370.617813173723	-1.14708	0.161873455675738	-7.08625	1.37795196940004e-12	6.81156445751952e-12	11.1667531293153	down-regulated
DEF6	62.3037478070912	-3.0237	0.426751518564961	-7.08539	1.38650903970154e-12	6.85111662592149e-12	11.1642386394631	down-regulated
LEP	47.5615250283889	-8.86873	1.25234203883484	-7.08171	1.42383989169022e-12	7.03275916849273e-12	11.1528742544173	down-regulated
FAM228B	394.649264963229	-1.15761	0.163563264367496	-7.07745	1.46828025092422e-12	7.24790643688101e-12	11.1397874215962	down-regulated
ENSG00000250644	1153.32954619708	-1.22392	0.172977569396484	-7.0756	1.48800850566122e-12	7.34088166531128e-12	11.1343	down-regulated
TRIM72	49.0562632983263	-6.00999	0.849752292509835	-7.07264	1.52011560469934e-12	7.49327932154531e-12	11.1253280782194	down-regulated
MSH4	46.7041546187048	-4.46081	0.630834628451343	-7.07129	1.53501425613146e-12	7.56369607078806e-12	11.1212659305715	down-regulated
HPD	238.271850731648	-1.46362	0.207059516631872	-7.06859	1.56516797125137e-12	7.70919497048728e-12	11.1129909706039	down-regulated
SLC5A12	47.4225033896647	-8.86884	1.25511468918832	-7.06616	1.59283483296183e-12	7.84076763222345e-12	11.1056414166371	down-regulated
MED12L	224.487157977777	-1.54255	0.218417791085144	-7.06239	1.63664389154084e-12	8.04998906908714e-12	11.0942047093512	down-regulated
MT-ND3	73608.2985972123	-1.18121	0.167257301730925	-7.06226	1.63821068004186e-12	8.05608810779812e-12	11.093875792638	down-regulated
CCDC136	335.236302954413	-1.20286	0.170334229035544	-7.06178	1.64380667896978e-12	8.08199486437236e-12	11.0924814298616	down-regulated
SNAI2	71.2239830448859	-2.61706	0.371254278450592	-7.04925	1.79882232974241e-12	8.82830341883532e-12	11.0541227490422	down-regulated
IGFALS	72.4446211157804	-3.72667	0.529014380018546	-7.04455	1.8605628118279e-12	9.12586439259479e-12	11.0397259889915	down-regulated
HAVCR2	58.5011403949446	-3.01166	0.427566609713664	-7.04371	1.8718089334788e-12	9.17737347416855e-12	11.0372815942769	down-regulated
RTL1	48.6876551331841	-8.89822	1.26355746855272	-7.0422	1.89228062771452e-12	9.27590018580600e-12	11.0326439332754	down-regulated
CTSE	46.225883617071	-8.83119	1.25418430055251	-7.04138	1.90347594673572e-12	9.32892426221251e-12	11.0301684327723	down-regulated
TTC24	71.1726865178008	-7.6459	1.08738579344433	-7.03145	2.04392261490806e-12	1.00039553448983e-11	10.9998282555169	down-regulated
RASA4	591.195684660022	-4.00984	0.570278198745172	-7.03138	2.045031020473e-12	1.00067694951767e-11	10.9997061040251	down-regulated
TAP1	276.14687461652	-1.29057	0.183571826972173	-7.03032	2.06065860971027e-12	1.00792373108289e-11	10.9965723294213	down-regulated
TLCD3B	159.77757948813	-1.75743	0.250137408607289	-7.02584	2.12778270193923e-12	1.04054947764741e-11	10.9827372644592	down-regulated
ENSG00000279267	184.115458155063	-1.90145	0.270641958579759	-7.0257	2.12997374355125e-12	1.04135413994441e-11	10.9824015520758	down-regulated
WNT1	69.0458156587822	-7.56016	1.07632606868303	-7.02404	2.1553661806881e-12	1.05299419513125e-11	10.9775740229545	down-regulated
ENSG00000258465	56.6711088745868	-3.19993	0.455660352031652	-7.02263	2.17731985613559e-12	1.06308752413259e-11	10.9734309784842	down-regulated
HSPA1L	109.975514672299	-2.06473	0.294035839627795	-7.02204	2.18649323804956e-12	1.06716285807398e-11	10.9717692985083	down-regulated
SRD5A2	48.4502458612054	-3.93548	0.56053962442074	-7.02088	2.20474494385816e-12	1.07562581349676e-11	10.9683387838709	down-regulated
CD6	43.2724684147384	-4.22949	0.602678305393323	-7.01783	2.25338108856911e-12	1.09891890396451e-11	10.959034355675	down-regulated
LRRC37A6P	208.22749287028	-1.857	0.264648185583104	-7.01685	2.26921327883621e-12	1.10620220980562e-11	10.9561654782973	down-regulated
KCNJ9	47.4358097074116	-8.864	1.26326090719359	-7.01676	2.27075841826164e-12	1.10673658614049e-11	10.9559557330496	down-regulated
TTLL6	204.711669143867	-1.49379	0.212907772386515	-7.01614	2.28079251301175e-12	1.11140733407325e-11	10.9541267416724	down-regulated
PASD1	45.479941824472	-8.80776	1.25550142028529	-7.01534	2.29396867393819e-12	1.11738620331801e-11	10.951796695299	down-regulated
TEX13B	45.5477894276368	-8.80969	1.25603930658693	-7.01386	2.3182830030152e-12	1.12900657033447e-11	10.9473035306599	down-regulated
DUSP15	51.2634872011436	-3.54053	0.505075649543991	-7.0099	2.38487829636209e-12	1.16075063695791e-11	10.9352610693441	down-regulated
ARMH4	98.9584437512529	-2.67599	0.381851464413461	-7.00793	2.41876110061217e-12	1.17654496156849e-11	10.9293914716431	down-regulated
TUBB8P7	45.9632632410607	-8.82269	1.25905513726344	-7.00739	2.42810011294271e-12	1.18085468503183e-11	10.9278035430061	down-regulated
LAMB2P1	65.7183729394839	-2.92963	0.418149156745496	-7.00619	2.44899934175417e-12	1.19054884190345e-11	10.9242527830948	down-regulated
SLC25A21	188.260871716277	-1.66338	0.237544842064201	-7.0024	2.51611202388395e-12	1.22245158874236e-11	10.9127683306979	down-regulated
RPL12P30	45.2110714744613	-8.79993	1.25690992439174	-7.00124	2.53709156236549e-12	1.23191611572649e-11	10.9094188633708	down-regulated
CEACAM16	66.494	-2.96154	0.42319298179569	-6.99807	2.59507111943008e-12	1.25932467000375e-11	10.8998622887854	down-regulated
PXT1	46.0245387259247	-8.82637	1.26158537369428	-6.99626	2.62894447355773e-12	1.27526051086472e-11	10.8944010882698	down-regulated
KCNH4	150.448439662024	-1.69102	0.241729063432068	-6.99552	2.64282823721041e-12	1.28149098551753e-11	10.8922844444573	down-regulated
C9orf43	135.927496279245	-2.01309	0.28780565566383	-6.99461	2.65999611695271e-12	1.28956193264736e-11	10.8895577955492	down-regulated
PTPRO	42.9270293355737	-5.08838	0.727878292170534	-6.9907	2.73509650377625e-12	1.3254491647551e-11	10.8776369242038	down-regulated
NAALADL1	77.6531314316297	-3.00962	0.430525985236442	-6.99056	2.73782031597592e-12	1.32650838108173e-11	10.8772900017344	down-regulated
TPSAB1	44.752589890719	-8.78145	1.25657357597931	-6.98841	2.78020265037503e-12	1.34651386516788e-11	10.8707891702622	down-regulated
PATL2	50.4773574757307	-3.63595	0.520668035162132	-6.98324	2.88448810590125e-12	1.39592463263992e-11	10.8551380290712	down-regulated
SOWAHA	79.1229470473431	-3.05086	0.437104494619666	-6.9797	2.95813069923938e-12	1.43072077688148e-11	10.8444451159901	down-regulated
SV2B	44.415287346856	-8.77306	1.25707989627602	-6.97892	2.9746388135818e-12	1.43842283311924e-11	10.8421134316877	down-regulated
CCDC152	44.8637267411742	-8.78503	1.25904663942757	-6.97752	3.00426911078108e-12	1.45246601527702e-11	10.8378940204181	down-regulated
CD200	44.5693506329729	-8.7771	1.25807955639506	-6.97659	3.0243610648289e-12	1.46160652754679e-11	10.8351695260885	down-regulated
RASGRF2	172.936992650403	-1.72205	0.246872050658532	-6.97549	3.04816301347959e-12	1.47195523228793e-11	10.8321053983314	down-regulated
DMBT1	108.357333274863	-2.12469	0.304657858685182	-6.97402	3.08000385882966e-12	1.48703985757675e-11	10.8276773907964	down-regulated
ENDOU	44.4401271797023	-8.76979	1.25813275386759	-6.97048	3.15857902517124e-12	1.52467769979482e-11	10.8168219517231	down-regulated
BEX4	57.5062637477493	-3.37574	0.48461129512237	-6.96586	3.2640044086398e-12	1.57525913629186e-11	10.8026479928557	down-regulated
KRT16	354.440740112138	-1.24919	0.179385956651324	-6.9637	3.31458293032954e-12	1.59873015845204e-11	10.7962248324293	down-regulated
WDR88	172.872557884067	-1.71703	0.246679176405424	-6.96058	3.3888151635557e-12	1.6340669958502e-11	10.7867301416031	down-regulated
FGR	45.2752298336027	-8.80436	1.26498142327574	-6.96007	3.40107817528082e-12	1.63948727370009e-11	10.7852919501342	down-regulated
DUSP2	50.077150485338	-4.34363	0.624089509506275	-6.95995	3.4039258353939e-12	1.64053919245612e-11	10.7850133898655	down-regulated
HAS1	76.0802517783393	-3.13786	0.451466129044684	-6.95038	3.64310579103441e-12	1.75204533672611e-11	10.7565	down-regulated
PFN4	173.934635365267	-1.67151	0.240538481107492	-6.94904	3.67788835145658e-12	1.76808314430787e-11	10.7524973160961	down-regulated
MYLPF	44.8755824005741	-8.78612	1.26523217251131	-6.94427	3.80413730156094e-12	1.82734981991583e-11	10.7381783052385	down-regulated
LYPD3	160.790610170175	-2.27758	0.327991336146468	-6.94402	3.81085050787712e-12	1.83021793727229e-11	10.7374971926088	down-regulated
MDK	764.705676560967	-1.31005	0.188685745672977	-6.94304	3.83762064544631e-12	1.84271570221158e-11	10.7345416634162	down-regulated
SHISA2	43.5292951785597	-8.74447	1.2595655427387	-6.94245	3.85360999024261e-12	1.85003297915211e-11	10.7328205296856	down-regulated
PPP1R36	70.874945621465	-2.7585	0.397727619264114	-6.93564	4.04380674968831e-12	1.93945377418903e-11	10.7123	down-regulated
MYOM1	195.705740479148	-1.57086	0.226572870358291	-6.93312	4.11645993677246e-12	1.97276380951234e-11	10.7049249078374	down-regulated
FFAR2	65.2879995402913	-7.47589	1.0784180022745	-6.93227	4.14134324612202e-12	1.98391748354839e-11	10.702476395279	down-regulated
AKR1C6P	70.2075027824546	-3.15964	0.455885266122053	-6.93077	4.18554606886402e-12	2.00470335515127e-11	10.6979498827706	down-regulated
CLCNKB	71.8875431136426	-3.80864	0.549559285543075	-6.93035	4.19804343661728e-12	2.01029850037858e-11	10.6967394513148	down-regulated
CD28	44.156437549526	-8.76573	1.26556051007072	-6.92636	4.31796765073276e-12	2.0665218118009e-11	10.6847600064506	down-regulated
BCAS2P1	42.8583386675288	-8.72153	1.25944397839955	-6.9249	4.36272614638695e-12	2.08713225229441e-11	10.6804500307516	down-regulated
ENSG00000267426	1060.73075930874	-1.23388	0.178192475134151	-6.9244	4.37828097867738e-12	2.09416730086059e-11	10.6789886259341	down-regulated
FES	164.358081941841	-1.61087	0.232714584158332	-6.92208	4.45060870296359e-12	2.1264652259549e-11	10.6723417149012	down-regulated
ADAMTS7P3	61.1278772799315	-2.96709	0.428960280216706	-6.91693	4.61521912322676e-12	2.20322195634752e-11	10.6569417490765	down-regulated
CALN1	44.9902674624827	-8.78393	1.27024581735809	-6.91514	4.67387872024161e-12	2.23036117327519e-11	10.651624803831	down-regulated
VWA3A	45.4236174467488	-4.42366	0.63973874585213	-6.91479	4.68565156078028e-12	2.23511382113691e-11	10.6507003559177	down-regulated
ZNF441	45.0840449778774	-5.8998	0.853277310744091	-6.91428	4.70234297669489e-12	2.24264188549976e-11	10.6492400708523	down-regulated
ZBED9	249.005024416606	-1.52578	0.22075990936657	-6.9115	4.7955729135191e-12	2.28577848925122e-11	10.6409658586114	down-regulated
ENSG00000205485	318.582832838679	-1.1426	0.165322447825449	-6.91132	4.80165465102598e-12	2.28823488221714e-11	10.640499398229	down-regulated
FGF7	48.6319860625949	-6.44571	0.932880430014191	-6.90947	4.86474279119418e-12	2.31695593679519e-11	10.6350822254196	down-regulated
TBC1D3P5	43.4795532087951	-8.74266	1.26531332917427	-6.90948	4.86418123524286e-12	2.31695593679519e-11	10.6350822254196	down-regulated
TPSB2	40.3756111163198	-4.80712	0.696238494894422	-6.90442	5.04091502289155e-12	2.39947165754629e-11	10.6198843755686	down-regulated
ANKLE1	122.604295209282	-1.89282	0.274211557408972	-6.90277	5.09966156485377e-12	2.42649791346796e-11	10.6150200777959	down-regulated
KRT75	42.7335110509543	-8.7165	1.26361312292633	-6.89807	5.27126284426686e-12	2.50573026681193e-11	10.6010656811232	down-regulated
WNT6	63.0643859019834	-3.00664	0.436023223257763	-6.89559	5.36432153145527e-12	2.54898331521656e-11	10.5936330072664	down-regulated
G6PC1	42.0438833464207	-8.69071	1.26137159724617	-6.88989	5.58367451553128e-12	2.65116995679656e-11	10.5765624303458	down-regulated
LHX5	48.8233303472674	-6.00743	0.871984581486187	-6.88937	5.60391419376503e-12	2.66026752753121e-11	10.5750746867192	down-regulated
FAM209A	50.6432383077396	-3.63858	0.528159529109177	-6.88917	5.61192062990891e-12	2.66355539793058e-11	10.5745382661157	down-regulated
TBC1D26	60.1028174981892	-4.74855	0.689464970982481	-6.88729	5.686362146306e-12	2.69784833777397e-11	10.5689824682739	down-regulated
NUGGC	41.7853366628061	-8.68549	1.26265637014036	-6.87875	6.03813927906073e-12	2.85979268986369e-11	10.5436654483085	down-regulated
CYP19A1	44.2304110297947	-5.99275	0.871345182769458	-6.87759	6.08738967615018e-12	2.88256493078091e-11	10.5402209012883	down-regulated
ANKRD35	41.6913580434348	-8.68251	1.26326927793749	-6.87305	6.28444586900919e-12	2.97359231406554e-11	10.526718574445	down-regulated
SMIM27	270.187341081862	-1.28255	0.186635829246195	-6.87195	6.33301233533973e-12	2.99599731511793e-11	10.5234585801682	down-regulated
PTCH2	176.568021767891	-1.87485	0.273033928226978	-6.86673	6.56885722089106e-12	3.1063776752236e-11	10.507745743619	down-regulated
ENSG00000255872	42.0930407254977	-8.6941	1.26629590472617	-6.86577	6.61323529709329e-12	3.12616445913603e-11	10.5049881786468	down-regulated
LAMA2	166.309711920203	-1.89442	0.276104375504706	-6.86123	6.8271023911716e-12	3.22540682535765e-11	10.4914154993652	down-regulated
TYRO3P	47.3806729881149	-4.54227	0.662331113979417	-6.85801	6.98266523363322e-12	3.29700561845482e-11	10.4818803127714	down-regulated
CDHR5	138.103808317394	-2.22886	0.325340482868789	-6.85085	7.34105003264243e-12	3.46158311791701e-11	10.4607252358511	down-regulated
MYO7B	80.6634339158251	-3.08185	0.45007132048767	-6.84748	7.5164088946209e-12	3.54156177504194e-11	10.4508051784524	down-regulated
GTF2IRD2P1	148.917637117046	-2.08653	0.304829377733707	-6.84492	7.65187506267001e-12	3.60401268714064e-11	10.4432136888513	down-regulated
EGFLAM	48.8399676844291	-4.29021	0.626807587017247	-6.84454	7.67205063764139e-12	3.61282506817833e-11	10.4421530663213	down-regulated
BEND4	41.6704292336705	-8.67992	1.26838094279145	-6.84331	7.73842744410957e-12	3.64269072660281e-11	10.438577699862	down-regulated
SOHLH1	40.5576054466222	-8.64059	1.26349650639708	-6.83864	7.9950276373047e-12	3.75917263617844e-11	10.424907729296	down-regulated
CCL22	47.4407483792021	-3.79431	0.554874447595918	-6.83815	8.02226665682359e-12	3.77126082425658e-11	10.423513430305	down-regulated
TRPV2	68.9332863315939	-2.93128	0.428684851767328	-6.83784	8.03944713495424e-12	3.77861679258135e-11	10.4226671497093	down-regulated
TNFRSF13C	100.455316249772	-2.1393	0.312917655338129	-6.83663	8.10786905966992e-12	3.81004933394935e-11	10.4191	down-regulated
TEX54	42.262593321001	-4.39727	0.644175553374846	-6.8262	8.71954966861617e-12	4.08813880621388e-11	10.3884743668486	down-regulated
NANOS1	284.03779766751	-1.48529	0.217666128154957	-6.82373	8.87086185203053e-12	4.15829029047835e-11	10.3810851958241	down-regulated
NANOS2	41.0586913217258	-8.66261	1.26989935331426	-6.82149	9.01008006560372e-12	4.22033999196775e-11	10.3746525607237	down-regulated
NR5A1	47.5286316231984	-5.95527	0.873319545543288	-6.81912	9.16014326922252e-12	4.28981481521416e-11	10.3675614552434	down-regulated
IL19	42.5401889364558	-8.7035	1.27637589716929	-6.81892	9.17285156036888e-12	4.29413476388556e-11	10.3671243301155	down-regulated
SIM1	41.0970001416326	-8.66325	1.27089406367035	-6.81666	9.31806691637702e-12	4.36128698732725e-11	10.3603853343512	down-regulated
PRR23D2	40.9148893979331	-8.65296	1.26990993436655	-6.81384	9.50285022131782e-12	4.44608585416449e-11	10.3520221553055	down-regulated
CYP2F2P	79.6463677606231	-2.34493	0.344255668104677	-6.81158	9.65305058349948e-12	4.51122280539202e-11	10.3457057229438	down-regulated
ENSG00000205794	39.2679242327897	-5.14932	0.756025836032679	-6.81104	9.68974542965371e-12	4.5275133497313e-11	10.3441402604604	down-regulated
ERV3-1	718.259126952521	-2.71295	0.398326297751564	-6.81088	9.70047928938345e-12	4.53166980181696e-11	10.3437417423376	down-regulated
SLC52A1	239.89675033442	-1.55315	0.228192334629261	-6.80631	1.0013199652182e-11	4.67510223154526e-11	10.3302088878694	down-regulated
PRLHR	39.7064546332679	-8.61046	1.26531715290743	-6.80498	1.01060284587867e-11	4.71665682631598e-11	10.326365720926	down-regulated
ARL14EPL	44.5284650297775	-3.77625	0.555067676491566	-6.80323	1.02301204350154e-11	4.77186242126773e-11	10.3213120860716	down-regulated
H2AC15	82.6066978429185	-2.37743	0.349502105921431	-6.80235	1.02929387780143e-11	4.80025589776029e-11	10.3187356101196	down-regulated
ENSG00000257611	40.9870921704656	-8.6553	1.27326462518838	-6.79772	1.06287413924028e-11	4.95311404169214e-11	10.3051216726015	down-regulated
ENSG00000269896	337.799001946904	-1.2905	0.189873457902409	-6.79664	1.07087085877496e-11	4.98849365278163e-11	10.3020305760293	down-regulated
ENSG00000225813	507.85487851899	-3.86476	0.568732386741489	-6.79539	1.08022432024409e-11	5.03111466893206e-11	10.2983357841418	down-regulated
OR8S1	40.5125624272693	-8.64349	1.27242934694774	-6.7929	1.09898444047005e-11	5.11172913706937e-11	10.2914321668592	down-regulated
OTP	45.562512446437	-4.51182	0.664365282330626	-6.79118	1.11223629579246e-11	5.17044110199429e-11	10.2864724046836	down-regulated
KRT38	40.5187527033563	-8.64379	1.27315368170098	-6.78927	1.12701518407886e-11	5.23716839168937e-11	10.2809034619194	down-regulated
CGB5	59.0158117383503	-2.94913	0.434734882974033	-6.78373	1.17109208523736e-11	5.43686668272531e-11	10.2646513161921	down-regulated
AGGF1P2	87.7622645408726	-2.57384	0.379902630832492	-6.775	1.24403083367694e-11	5.76571688509194e-11	10.2391466866549	down-regulated
CYP4F22	38.8568764802458	-8.58014	1.26832223145314	-6.76495	1.33350951243996e-11	6.17346037571265e-11	10.2094713350244	down-regulated
HAL	377.19347411275	-3.87529	0.572862630407769	-6.76478	1.33511516842364e-11	6.17973322042427e-11	10.2090302730339	down-regulated
FRMD7	38.9001250602078	-8.57923	1.26846024458499	-6.7635	1.34700392825772e-11	6.23125179947632e-11	10.2054246989276	down-regulated
CPXM1	38.9386963265017	-8.57965	1.26881316756215	-6.76195	1.36146989817787e-11	6.29580865313839e-11	10.2009484798467	down-regulated
CD164L2	39.187000678377	-8.58729	1.27032324423304	-6.75993	1.3806092031386e-11	6.38191975919235e-11	10.195048660556	down-regulated
ENSG00000289517	367.068190263923	-7.02683	1.03970447447566	-6.75849	1.39441791176046e-11	6.44212712907024e-11	10.1909707090555	down-regulated
MT3	42.2436318455801	-5.92358	0.876494528590471	-6.75826	1.39659316394941e-11	6.45096771176331e-11	10.1903751318214	down-regulated
UPK2	106.477462971123	-2.15415	0.318813120630295	-6.75677	1.41102248311898e-11	6.51517629778033e-11	10.1860738279764	down-regulated
APBA1	117.796642083968	-2.41351	0.357357669097421	-6.75375	1.44067540555738e-11	6.65084833292146e-11	10.1771229557783	down-regulated
ENSG00000255432	41.2493687654321	-8.66076	1.28312071700705	-6.74976	1.48088774383613e-11	6.83392824055565e-11	10.1653295858086	down-regulated
CYS1	134.180791418276	-2.37335	0.351622165059524	-6.74971	1.48145858837183e-11	6.83528300964672e-11	10.1652434990942	down-regulated
DRD2	39.3103776366045	-8.59993	1.27435775926136	-6.74845	1.49436954445125e-11	6.89227278013324e-11	10.1616375425179	down-regulated
SLC16A12	44.8950315310986	-5.05796	0.749579949548151	-6.74773	1.50176863593833e-11	6.92510295794082e-11	10.1595737654067	down-regulated
DACT3	509.027685485861	-6.685	0.9908577253448	-6.74668	1.51268147412677e-11	6.97281669786336e-11	10.1565917514239	down-regulated
FAM83C	38.4417654784507	-8.56589	1.26994210647102	-6.74511	1.52916188814485e-11	7.04746660432731e-11	10.1519669734331	down-regulated
MBD3L2B	40.2344562575806	-8.6239	1.27893870250748	-6.74301	1.55137284053228e-11	7.14849406818725e-11	10.1457854388647	down-regulated
FABP5P3	38.2727202428544	-8.55501	1.26941339884248	-6.73934	1.59108397356364e-11	7.32736822646943e-11	10.135051983061	down-regulated
ZNF821	482.152075291212	-1.15976	0.172118251265734	-6.73815	1.60421046478561e-11	7.38643936830312e-11	10.1315648627351	down-regulated
PSG8	41.2566020695469	-5.32767	0.790864059281828	-6.73652	1.62220924681342e-11	7.46652396423532e-11	10.1268815366718	down-regulated
LVRN	52.6230014856528	-3.43056	0.509383797782888	-6.73473	1.64230850515983e-11	7.55762353354492e-11	10.1216147453081	down-regulated
GPR162	224.498553080647	-1.40195	0.208271697614339	-6.73134	1.68105832587125e-11	7.73449978525158e-11	10.1115677682645	down-regulated
ENSG00000279965	40.601842096229	-8.6419	1.28422641928527	-6.72927	1.70518179415485e-11	7.84256372938532e-11	10.1055419434995	down-regulated
CIBAR2	38.6272026545448	-8.57228	1.27402327125348	-6.72851	1.71406107629009e-11	7.88193129130823e-11	10.1033673553034	down-regulated
DPEP3	38.4772320914086	-8.56798	1.2736951009081	-6.72687	1.73355939125329e-11	7.96861945052696e-11	10.0986169128513	down-regulated
CCDC96	264.256516820372	-1.52919	0.22732964009551	-6.72674	1.7350058299314e-11	7.9737814540397e-11	10.0983356716841	down-regulated
PLEKHA3P1	59.2135186202307	-2.94893	0.438493578444047	-6.72515	1.75413445435193e-11	8.05718698876165e-11	10.0938165572639	down-regulated
FNDC7	37.9114439338046	-8.54291	1.27044795095878	-6.72433	1.76399697857606e-11	8.09946982973683e-11	10.0915	down-regulated
DNM1P47	78.1070714168104	-2.68292	0.399017579040702	-6.72381	1.77032026615793e-11	8.12698979540509e-11	10.0900702855655	down-regulated
KLHL33	38.5291096754494	-8.56222	1.27350766340136	-6.72334	1.77609719190761e-11	8.15199180318496e-11	10.0887362656838	down-regulated
TEX37	38.1511192816013	-8.55578	1.27284846535461	-6.72176	1.79540463716306e-11	8.23600951160101e-11	10.0842831604958	down-regulated
NOX5	86.0148059033709	-2.49198	0.370849748182678	-6.71966	1.82151185836947e-11	8.35110848661413e-11	10.0782558744962	down-regulated
OSTCP2	154.851992634951	-1.96166	0.292166552893438	-6.71418	1.89133213029641e-11	8.66154926176243e-11	10.0624044202625	down-regulated
BEST2	41.5251122525478	-5.90396	0.880098890148508	-6.70829	1.96916958493479e-11	9.0113177293136e-11	10.0452116972868	down-regulated
FUT1	244.062672253362	-1.53514	0.22897376038994	-6.70443	2.02200362566871e-11	9.2445165764067e-11	10.0341157944765	down-regulated
SLC37A2	136.935807606612	-2.03753	0.303943215184576	-6.70365	2.0327395440531e-11	9.29187747821196e-11	10.0318965253986	down-regulated
LTK	97.2192862349764	-2.064	0.307986642348383	-6.70159	2.06162517236264e-11	9.41693232334331e-11	10.0260905507127	down-regulated
RGS4	37.529279482319	-8.53058	1.27472396964707	-6.6921	2.19990782314798e-11	1.00299847708977e-10	9.99869972639335	down-regulated
HYDIN2	49.4893747548327	-3.33105	0.49789414714457	-6.69028	2.22738502137104e-11	1.01515059247253e-10	9.9934695275748	down-regulated
ENSG00000279200	37.2314142724094	-8.51487	1.27275840168604	-6.69009	2.23036820145125e-11	1.01632230872784e-10	9.99296854135917	down-regulated
CRACDL	172.436887482104	-1.74907	0.261503940654613	-6.68851	2.25458987177711e-11	1.02660047135296e-10	9.9885985406734	down-regulated
ENSG00000260776	36.9598020806916	-8.50849	1.27232342441857	-6.68736	2.27231955598414e-11	1.03429139021642e-10	9.98535709051182	down-regulated
ANKRD20A21P	52.7575314688022	-3.15713	0.472356612805575	-6.68378	2.32852893707102e-11	1.05870334482985e-10	9.9752257148236	down-regulated
ARID5A	318.02641024897	-1.1845	0.177234754597033	-6.68322	2.33754975822589e-11	1.06241291740016e-10	9.97370665755295	down-regulated
GDF5	39.0366266362835	-8.58002	1.28488043563274	-6.67768	2.42749935395303e-11	1.10248183628685e-10	9.95762855693076	down-regulated
LIN28A	36.6485898857067	-8.49641	1.27358315345826	-6.67127	2.5360657971773e-11	1.15051700463774e-10	9.93910695807681	down-regulated
OLIG2	36.4948487438902	-8.48991	1.27352545978477	-6.66647	2.62038024702785e-11	1.18789286226058e-10	9.92522272722287	down-regulated
IGFL1	93.028335048733	-2.12086	0.318151064021649	-6.66621	2.6248801046583e-11	1.18949530036832e-10	9.92463726949737	down-regulated
IL23A	78.3589025134772	-2.67775	0.401861356056494	-6.66337	2.67623966641259e-11	1.21254659541267e-10	9.91630156345412	down-regulated
ITIH3	328.552211229365	-8.36762	1.25604095784652	-6.6619	2.70313568237941e-11	1.22428258023181e-10	9.91211832984467	down-regulated
GSTA9P	36.5028931572814	-8.48629	1.27400038119918	-6.66114	2.71717492375487e-11	1.23041506650266e-10	9.90994835954938	down-regulated
OR6J1	38.1545677159811	-8.55837	1.28493368032432	-6.66056	2.72794834030907e-11	1.23483992811787e-10	9.90838933620249	down-regulated
FRAT1	391.879244388372	-1.28119	0.192356893530207	-6.66051	2.7288776687184e-11	1.23503382209007e-10	9.90832114884484	down-regulated
PDLIM1P4	40.9993373119618	-3.81912	0.573460150872822	-6.65979	2.74224064014535e-11	1.24062610131883e-10	9.90635908602814	down-regulated
C1QTNF2	60.1676091875414	-3.29634	0.495148509919196	-6.65728	2.78950761843741e-11	1.26131588058912e-10	9.89917613625228	down-regulated
GLULP4	37.1218907496148	-8.51387	1.27892867305184	-6.65703	2.7941844863119e-11	1.26319889889164e-10	9.89852826156649	down-regulated
SIGLEC14	38.2366371768267	-4.86836	0.731456294790924	-6.65571	2.81927883481377e-11	1.27430989798e-10	9.89472494357342	down-regulated
MEGF10	38.5401806018466	-8.57341	1.28815613894714	-6.65557	2.82203200882282e-11	1.2753204964528e-10	9.89438066044588	down-regulated
SNORD3A	105.784193620283	-2.27906	0.342746961177085	-6.64938	2.94325816048725e-11	1.32815669361764e-10	9.87675068463739	down-regulated
DDX4	45.1204524340586	-6.31769	0.950208797373262	-6.64874	2.95614245408408e-11	1.33372664308347e-10	9.87493317309234	down-regulated
TMEFF2	142.558264600568	-2.19905	0.330792161744077	-6.64784	2.97417982074212e-11	1.3416190474096e-10	9.87237078453572	down-regulated
SCN5A	111.993792688067	-2.23261	0.335861013255589	-6.64742	2.98270671724086e-11	1.34521928271902e-10	9.87120691602403	down-regulated
HBA2	333.009777400134	-8.38644	1.26250873861713	-6.64268	3.08031249956382e-11	1.38797045767222e-10	9.85761977754577	down-regulated
ENSG00000280436	37.3454556338855	-8.52664	1.28371178999899	-6.64218	3.09083535401873e-11	1.39245747710654e-10	9.85621805844505	down-regulated
GRM1	48.8298945287584	-4.1911	0.631296903309468	-6.63887	3.16093247300223e-11	1.42269576175734e-10	9.84688796226049	down-regulated
PTP4A3	379.932368727812	-2.09567	0.315765639286587	-6.63678	3.20602368510513e-11	1.44197949069899e-10	9.84104091655112	down-regulated
ENSG00000243802	42.0153814834277	-4.28318	0.645418095357916	-6.63629	3.2166676059163e-11	1.44650291537849e-10	9.83968068670904	down-regulated
RHBDL1	320.142290179878	-1.34426	0.202753302099583	-6.63003	3.35623174938953e-11	1.50843801432909e-10	9.82147253142067	down-regulated
CHMP4BP1	50.4381397619058	-3.15606	0.476485673948933	-6.62362	3.50507078346867e-11	1.57389808659508e-10	9.80302339260106	down-regulated
SLC5A5	68.6063427115826	-3.92863	0.593250077988787	-6.62222	3.53849299512206e-11	1.58832719074561e-10	9.79906002930278	down-regulated
MBD3L2	36.0021510632217	-8.46673	1.27908735134842	-6.61935	3.60779604087716e-11	1.61884579540779e-10	9.79079451838253	down-regulated
DNMT3L	35.4332989196102	-8.44453	1.27578602133136	-6.61908	3.61449283252609e-11	1.62155554699605e-10	9.79006816981513	down-regulated
TEX9	505.071763882425	-1.11449	0.168475128121593	-6.61517	3.71121362651789e-11	1.66434124651481e-10	9.77876	down-regulated
RTN1	50.763080405712	-3.0591	0.462637315443556	-6.61231	3.78369285566552e-11	1.69591993232485e-10	9.77059465548163	down-regulated
VSIG1	84.8727628891859	-2.42359	0.366566507300427	-6.61161	3.80173621673421e-11	1.70338788104202e-10	9.76868644691984	down-regulated
ENSG00000282988	72.4395684890213	-2.46843	0.373566376407947	-6.60773	3.90252552119917e-11	1.74791168511268e-10	9.75748051428581	down-regulated
CYP4F8	35.4996551970996	-8.45233	1.28029709837324	-6.60185	4.06061641549051e-11	1.8177286340053e-10	9.74047095144995	down-regulated
KRT16P6	38.4571102395589	-8.57101	1.29861108498001	-6.60014	4.10779411625128e-11	1.83851380816678e-10	9.73553310401208	down-regulated
IRX5	324.322283382089	-1.157	0.175381408687072	-6.59704	4.19446481656291e-11	1.87526199959936e-10	9.72693804685293	down-regulated
LRP2	42.0411584403873	-5.93186	0.899168052439816	-6.59705	4.19421302465592e-11	1.87526199959936e-10	9.72693804685293	down-regulated
SNX32	287.351080533081	-1.55345	0.235475749292389	-6.59706	4.19388840162639e-11	1.87526199959936e-10	9.72693804685293	down-regulated
CFAP53	116.596875801005	-2.02193	0.306654335788674	-6.59351	4.2955222686415e-11	1.9190506518041e-10	9.71691356225843	down-regulated
ENSG00000284883	42.4300019539945	-4.25687	0.645646674861794	-6.59319	4.3046872101901e-11	1.92279668609542e-10	9.71606663504127	down-regulated
GFI1	80.8734935704959	-2.56753	0.389472280270313	-6.59232	4.32993252496181e-11	1.93337251594563e-10	9.71368445945679	down-regulated
PEBP4	37.7780196848107	-5.28194	0.801224364863196	-6.59233	4.32972584761933e-11	1.93337251594563e-10	9.71368445945679	down-regulated
ISLR2	71.7483194862107	-3.55786	0.539701867962637	-6.59228	4.33132968526398e-11	1.93364613185671e-10	9.71362300131999	down-regulated
SAXO1	35.1436001250771	-8.43309	1.27956578116122	-6.59059	4.38092795508794e-11	1.95508030320109e-10	9.70883539963851	down-regulated
C1QTNF4	38.662152737188	-3.9697	0.602501039243275	-6.5887	4.43696051769565e-11	1.97901123000241e-10	9.70355174135993	down-regulated
TMEM269	130.757493961863	-1.84866	0.28073274692388	-6.58513	4.54495031646632e-11	2.02644447823346e-10	9.6932652908254	down-regulated
APOL3	210.089816824687	-5.76822	0.876550475785587	-6.58059	4.68579346073791e-11	2.08735418131751e-10	9.6804038537898	down-regulated
MEFV	35.7741312325099	-8.46418	1.2864439500161	-6.57952	4.71979081710542e-11	2.10211893809002e-10	9.67734271518938	down-regulated
UTS2R	47.7645731094797	-3.20979	0.487849975984218	-6.57947	4.72134281584727e-11	2.10243033049615e-10	9.67727838677019	down-regulated
PARP15	36.2932820736853	-8.48637	1.29032490634188	-6.57693	4.80266587143299e-11	2.13748544976649e-10	9.67009683290745	down-regulated
IRAG1	35.0480081780451	-8.42611	1.28125304613574	-6.57646	4.81771835443487e-11	2.1430240504065e-10	9.66897295499633	down-regulated
SLCO4C1	81.076686034471	-2.36975	0.360789768904609	-6.56823	5.09153046005083e-11	2.262780041485e-10	9.64535766054466	down-regulated
PLAC1	76.0738380519007	-2.52001	0.38388467177421	-6.5645	5.22084136069346e-11	2.31941216838737e-10	9.63462206871837	down-regulated
PLAAT5	77.552208807009	-2.86885	0.43711085285059	-6.5632	5.26635116213171e-11	2.33794505400452e-10	9.63116569977086	down-regulated
QPRT	219.376940441127	-1.48374	0.226074450328535	-6.56307	5.27123504622417e-11	2.33969186819442e-10	9.63084133436522	down-regulated
TNFSF11	35.0963591873761	-8.43504	1.2854475454322	-6.56195	5.31080633823948e-11	2.35598340561957e-10	9.62782777282943	down-regulated
HECA	320.058384467681	-1.11924	0.170592891059523	-6.56091	5.34808064489111e-11	2.37123892190388e-10	9.62502468506153	down-regulated
C11orf94	48.0436998045132	-3.62819	0.553188830982208	-6.55868	5.42868634590282e-11	2.40438332373691e-10	9.61899629286203	down-regulated
PLP1	37.3636203770307	-8.51519	1.29872615875354	-6.55657	5.5057788224369e-11	2.43721421315702e-10	9.61310629785527	down-regulated
ZNF329	576.08650612132	-1.01625	0.15501303867764	-6.5559	5.53077261279859e-11	2.4478385359194e-10	9.61121723247088	down-regulated
PRAP1	34.561278994405	-8.4056	1.28306849722855	-6.55117	5.70882279232087e-11	2.52437487849855e-10	9.5978461503891	down-regulated
SSUH2	252.187936865339	-1.32096	0.201747334521753	-6.54759	5.84724508353484e-11	2.58419300464864e-10	9.5876750534774	down-regulated
BRINP2	34.3121085748703	-8.40345	1.28407680449612	-6.54435	5.97539224974445e-11	2.63846264984238e-10	9.57864904932925	down-regulated
CPNE6	34.8422674502026	-8.41713	1.28644801502874	-6.54292	6.03285295444881e-11	2.66192752878239e-10	9.57480377240693	down-regulated
ZNF34	722.443914234975	-1.06511	0.162824075294269	-6.54148	6.09141945118539e-11	2.68680752031888e-10	9.57076344479034	down-regulated
CD163L1	145.80585281535	-2.31227	0.353691653435556	-6.53754	6.25376364605151e-11	2.75742767666718e-10	9.55949586965342	down-regulated
IRX4	39.7662161940517	-5.70937	0.873652583024589	-6.53506	6.35845409135315e-11	2.80258555801963e-10	9.5524411202821	down-regulated
N4BP3	157.629061990746	-1.75508	0.268689308248704	-6.53199	6.49017423682429e-11	2.85962064854678e-10	9.54369157567168	down-regulated
NPC1L1	384.704548350605	-6.49471	0.994926820658598	-6.52783	6.67306872215969e-11	2.93810484262691e-10	9.53193271100936	down-regulated
ATF4P1	51.6297461972037	-7.13688	1.09356169610392	-6.52627	6.74275122961153e-11	2.96772546531661e-10	9.52757627671264	down-regulated
VMO1	85.0176785934837	-2.40337	0.368476075408655	-6.52246	6.91631205175682e-11	3.0435723795057e-10	9.51661636578672	down-regulated
[truncated: 5,305 more rows]

## Sheet: Vehicle_vs_LLTD-8
Genes	baseMean	log2FoldChange	lfcSE	stat	pvalue	padj	logP	Group
ACSBG1	1305.74043742384	-5.66859	0.149540045741126	-37.9068	0	0	Inf	down-regulated
ATP1A3	3244.90755465988	-4.36668	0.0948470235888896	-46.0392	0	0	Inf	down-regulated
CRISPLD2	1913.31431350949	-4.63482	0.103955916890616	-44.5845	0	0	Inf	down-regulated
DHRS2	20705.9241531872	-6.1935	0.0599802757771984	-103.259	0	0	Inf	down-regulated
DNAH3	2177.41570794885	-6.22755	0.136204426977746	-45.7221	0	0	Inf	down-regulated
HAP1	2275.99990400565	-3.90704	0.087522537371148	-44.6404	0	0	Inf	down-regulated
L1CAM	6384.09030813547	-2.02595	0.050408016202297	-40.191	0	0	Inf	down-regulated
PGF	1890.55709801894	-6.77618	0.16563996216295	-40.9091	0	0	Inf	down-regulated
SERPINH1	25375.7239681487	-1.41902	0.0373522784160369	-37.9901	0	0	Inf	down-regulated
SLC6A8	4284.06101343442	-2.79924	0.0646932940332823	-43.2695	0	0	Inf	down-regulated
EPPK1	1157.31546093317	-5.23777	0.149929732848168	-34.9348	2.2015059453456e-267	4.1806597902113e-264	263.378755172618	down-regulated
MCAM	3541.94272648031	-2.18777	0.0638967594249727	-34.2391	6.33551280821709e-257	1.11056666056655e-253	252.954455368275	down-regulated
H2AC19	1514.43892055723	-3.30299	0.0993556042673254	-33.2441	2.48300806883841e-242	4.04162770519212e-239	238.393443694044	down-regulated
H2AC18	1599.29121418426	-3.33725	0.102547860249368	-32.5434	2.59824540406997e-232	3.70055101674665e-229	228.431733604118	down-regulated
BAIAP3	1163.08603911186	-3.5912	0.114496055579648	-31.3653	6.02094197247242e-216	7.22132766677377e-213	212.141382948504	down-regulated
PLXNA3	6000.72644434707	-1.82056	0.0591243071035703	-30.7921	3.34457725851359e-208	3.62934412223846e-205	204.440171851501	down-regulated
NES	1640.61481796364	-2.60213	0.0858426317018678	-30.3128	7.76660533975578e-202	8.04479102192522e-199	198.094485233007	down-regulated
CDIP1	1112.83387427408	-3.03464	0.102858765586332	-29.5029	2.63975659546018e-191	2.61542492597159e-188	187.582457741591	down-regulated
FLNC	1496.64670555181	-3.82675	0.131686166326053	-29.0596	1.16384717197534e-185	1.10507288979058e-182	181.956609075291	down-regulated
NEFL	1081.19846816444	-3.49125	0.120202987859732	-29.0446	1.80072723761337e-185	1.64139889162934e-182	181.784785864174	down-regulated
CYP1A1	847.453281575588	-4.44127	0.155777405589112	-28.5104	8.71000558423174e-179	7.35124471309159e-176	175.133639119928	down-regulated
CDKN1A	12995.1860685452	-1.57639	0.0554167580775467	-28.446	5.45736028002536e-178	4.4415116450435e-175	174.352469194892	down-regulated
KRT4	1824.66940826851	-2.45513	0.0863263796807004	-28.4401	6.46302722571641e-178	5.0786022213664e-175	174.294255801708	down-regulated
SLC17A7	726.066274587612	-5.98307	0.216551496486212	-27.6288	5.01215433810869e-168	3.46112039566124e-165	164.460783293436	down-regulated
SYT11	997.188700706721	-3.20879	0.120473878966431	-26.6347	2.68925974220212e-156	1.70230141681394e-153	152.768963539393	down-regulated
SYT7	992.253442732293	-2.82197	0.106649688521565	-26.4602	2.78422974324681e-154	1.71478452402995e-151	150.765790444661	down-regulated
TUFT1	4298.2796601238	-1.61332	0.0612904206784137	-26.3225	1.05874882232695e-152	6.34914951662804e-150	149.19728444557	down-regulated
NDRG1	6713.3842922991	-1.62338	0.0629356423415261	-25.7943	1.02839822656999e-146	5.85878469676921e-144	143.232192461495	down-regulated
GIPC3	635.064117928626	-6.3947	0.248263966629174	-25.7577	2.64489730194042e-146	1.47004682235654e-143	142.832668832349	down-regulated
CARNS1	573.915066515419	-5.02438	0.195563770940812	-25.6917	1.44545686226641e-145	7.84263594698258e-143	142.105537944353	down-regulated
ATF3	1237.39	-2.63394	0.103293113206309	-25.4997	1.98807728875243e-143	1.05358849432768e-140	139.977328980716	down-regulated
GALR2	524.254790553948	-5.36455	0.210547929767771	-25.479	3.36824272289661e-143	1.74444352657654e-140	139.758343085541	down-regulated
CLIC3	845.220914554566	-3.15038	0.124273401032639	-25.3504	8.88780324391754e-142	4.50078356271984e-139	138.34671187126	down-regulated
RRAD	628.590092441891	-4.63099	0.182823285697619	-25.3304	1.47736949679514e-141	7.31876002021038e-139	138.135562492985	down-regulated
COX6B2	578.593605724092	-4.20348	0.166368914370928	-25.266	7.55783976686668e-141	3.66442665122038e-138	137.435993966914	down-regulated
CEACAM22P	626.689743097134	-6.46962	0.256833897112383	-25.1899	5.16723983647643e-140	2.45314711236719e-137	136.61027640688	down-regulated
FSCN1	27922.4197382564	-1.18561	0.0471977276483775	-25.1201	3.0012790334521e-139	1.39577850233278e-136	135.855183494927	down-regulated
H2BC11	924.980098027662	-3.12735	0.125208705272651	-24.9771	1.08529797575751e-137	4.94635405431242e-135	134.305714800565	down-regulated
DPYSL4	2663.26088276267	-1.69621	0.06860003322269	-24.7261	5.61091530021366e-135	2.45887572810133e-132	131.609263420006	down-regulated
CLDN4	1732.27031671764	-2.40992	0.0976343992047445	-24.6831	1.62488211217973e-134	6.98637991931164e-132	131.155747801124	down-regulated
PPL	4349.04225421128	-1.47364	0.0598122024195039	-24.6378	4.9755586814033e-134	2.09968576355219e-131	130.677845696393	down-regulated
SLC16A3	10238.6082379529	-1.36353	0.0553707593241717	-24.6255	6.73058582761097e-134	2.78866526981089e-131	130.554603612015	down-regulated
H2BC21	1049.22008083944	-2.85235	0.11827428086069	-24.1164	1.68058259239125e-128	6.60295105438136e-126	125.180261922005	down-regulated
MX1	683.400939066107	-3.84494	0.160231638677021	-23.9961	3.05162510215455e-127	1.17865140386268e-124	123.928614622186	down-regulated
CORO1A	871.324780145694	-2.90664	0.12124493499302	-23.9733	5.28792760878155e-127	1.97543105490023e-124	123.704338123157	down-regulated
CRABP2	3596.78409805894	-5.35405	0.22397868474666	-23.9043	2.76400200948066e-126	1.01590448051686e-123	122.993147124271	down-regulated
H2BC12	3675.51047067562	-2.08397	0.0905185345171444	-23.0226	2.76817251571575e-117	9.14219062146818e-115	114.03894972759	down-regulated
ISG15	963.945276942339	-2.94416	0.127930022074225	-23.0138	3.39090862381966e-117	1.10388608170861e-114	113.957075742402	down-regulated
H1-0	23222.669338363	-1.30958	0.0569439927470687	-22.9976	4.92350976289829e-117	1.58023859826657e-114	113.801277334509	down-regulated
CHRM4	442.675749253485	-5.514	0.239973280869294	-22.9776	7.8166618322564e-117	2.44008342237615e-114	113.612595325605	down-regulated
CKB	6597.84757577859	-1.40995	0.0613611119219889	-22.9779	7.75015363519799e-117	2.44008342237615e-114	113.612595325605	down-regulated
ANGPTL4	1417.7501474894	-2.23075	0.0984013937970614	-22.6699	8.87862290392324e-114	2.62761115239744e-111	110.58043890352	down-regulated
DAPK3	4587.36117954952	-1.2747	0.0564638585587883	-22.5755	7.5528058304722e-113	2.20658127262565e-110	109.656280072022	down-regulated
ADGRE5	10166.2292693736	-1.12363	0.0498684073729809	-22.532	2.01751938280795e-112	5.81964958169968e-110	109.235103164717	down-regulated
ACBD7	611.121959764983	-3.4417	0.153046750164747	-22.4879	5.44860299224505e-112	1.552034562341e-109	108.809098611643	down-regulated
VSIR	5472.05789698554	-1.23426	0.0551360821561115	-22.3857	5.42376999456388e-111	1.52296447862939e-108	107.817310225958	down-regulated
NEFH	718.31020939479	-7.75159	0.347287722985222	-22.3204	2.34275013961902e-110	6.35554645019503e-108	107.196847102844	down-regulated
TNFSF9	1285.9556799836	-2.51242	0.112589921856645	-22.3148	2.65313369512061e-110	7.03018728423355e-108	107.153033105218	down-regulated
CACNA1G	1595.08677272721	-2.13475	0.0958630856554798	-22.2687	7.43231791943466e-110	1.94675472124227e-107	106.710688763386	down-regulated
ARC	443.236514914118	-5.54324	0.249060971633677	-22.2566	9.74613528176064e-110	2.52380603182684e-107	106.59794402603	down-regulated
ALPP	948.328533771363	-8.5748	0.386350800493625	-22.1943	3.89454064612448e-109	9.86097691598719e-107	106.006080057857	down-regulated
HSPA1B	8381.45700932889	-1.39275	0.0628335613880386	-22.1657	7.36555397942274e-109	1.84446422069325e-106	105.734129764892	down-regulated
ADAM11	853.792127607055	-3.11652	0.1413421086838	-22.0494	9.67009721113066e-108	2.36948575534672e-105	104.625345897808	down-regulated
INPP5D	465.375854813591	-4.94471	0.225509737355069	-21.9268	1.44204930897168e-106	3.4590968055628e-104	103.461037283741	down-regulated
CCN2	2808.65	-1.68611	0.0777030963749986	-21.6994	2.07987854396183e-104	4.73962722598022e-102	101.324255814458	down-regulated
H2BC5	1797.70817828037	-1.75277	0.0810418760645222	-21.6279	9.81174637878583e-104	2.19205957333109e-101	100.65914764726	down-regulated
TPPP3	680.857811491964	-2.84312	0.132071170295815	-21.5272	8.66183857781698e-103	1.89794209145474e-100	99.7217170425648	down-regulated
CYSRT1	642.685672665623	-3.50774	0.164311492548056	-21.3481	4.05853782605576e-101	8.72509056416591e-99	98.0592300564819	down-regulated
SLC30A3	623.174760831958	-3.30806	0.155492759710815	-21.2747	1.94875689626945e-100	4.11187705112854e-98	97.3859598796195	down-regulated
PNPLA2	8170.61625530268	-1.25105	0.0589592936550493	-21.2189	6.39651546177255e-100	1.32512540311703e-97	96.8777430203652	down-regulated
CHKA	5182.63559368968	-1.10792	0.0527959784227875	-20.985	9.00023306551649e-98	1.81502045218575e-95	94.741118476842	down-regulated
ICAM1	760.858338450165	-3.00518	0.144340823978761	-20.82	2.84976300687704e-96	5.598310293165e-94	93.2519430339023	down-regulated
BAIAP2	2293.07707753109	-1.6364	0.0787491952454356	-20.7799	6.57697957635937e-96	1.28099325287246e-93	92.8924531577245	down-regulated
SLC44A2	2571.24434702725	-1.54031	0.0742240967384951	-20.7521	1.17286291987416e-95	2.26501696763495e-93	92.6449285402637	down-regulated
PAPSS2	4603.04001001975	-1.15779	0.0558013300769216	-20.7485	1.26439024657067e-95	2.42125419654223e-93	92.6159596135486	down-regulated
EHD1	13118.687664365	-1.0118	0.0491685754322159	-20.5782	4.30297630612801e-94	7.97205073691423e-92	91.098429945961	down-regulated
H3C10	887.788069870128	-2.17832	0.106637721360597	-20.4273	9.567688639363e-93	1.758294263821e-90	89.7549084407189	down-regulated
UNC5B	443.972828179814	-3.26281	0.16033066650701	-20.3505	4.59356040805462e-92	8.3077821094245e-90	89.0805149023531	down-regulated
JAG2	4414.34816351175	-1.43822	0.0706801555276371	-20.3483	4.80392593339026e-92	8.61983182441711e-90	89.0645012073122	down-regulated
SULF2	3988.12715137306	-1.15279	0.0570559578017506	-20.2045	8.9345170743653e-91	1.53082537662133e-88	87.8150743470516	down-regulated
TIMP2	14238.2673828979	-1.0343	0.0512831975882798	-20.1684	1.85406060583839e-90	3.1296543026552e-88	87.5045036313803	down-regulated
IER5	7082.54124467414	-1.07761	0.0536327703217809	-20.0923	8.61002003561175e-90	1.44268482773177e-87	86.8408285355227	down-regulated
ACHE	361.515660425452	-4.32373	0.216167907859597	-20.0017	5.31991888756578e-89	8.84892785473351e-87	86.0531093456841	down-regulated
H4C14	1437.97273700105	-2.06443	0.103291816926224	-19.9863	7.24027149908696e-89	1.19558918058836e-86	85.9224180237365	down-regulated
HES2	454.485170919223	-3.16306	0.158468440770155	-19.9602	1.22232739744771e-88	2.00391343403154e-86	85.6981210432511	down-regulated
SYTL2	1020.09391188575	-2.18385	0.109674263493718	-19.9121	3.19568824970265e-88	5.20166741673028e-86	85.2838574190944	down-regulated
NRIP3	513.840392230873	-3.00173	0.152173290924662	-19.7258	1.29609048479229e-86	2.00920475969025e-84	83.6969758016927	down-regulated
CHD5	405.568987721431	-3.34076	0.170188844420683	-19.6297	8.62099204427934e-86	1.31849105171166e-83	82.8799228133149	down-regulated
SLC9A3R1	8723.11189126339	-1.12435	0.0574321999242061	-19.577	2.42864198584414e-85	3.66515851479577e-83	82.4359072377725	down-regulated
TINAGL1	3089.24917161595	-1.21096	0.062329663687352	-19.4284	4.44160721173523e-84	6.61538203536095e-82	81.1794450704397	down-regulated
COL1A1	1282.23318153769	-2.04775	0.105434448843258	-19.422	5.02714488261233e-84	7.43886867434869e-82	81.1284931082508	down-regulated
TUBB2A	3863.98531794069	-1.18581	0.0614071585420846	-19.3106	4.37095021707646e-83	6.2644788394175e-81	80.2031150534136	down-regulated
FGFR3	1794.37268783075	-1.76245	0.0915221292007908	-19.2571	1.23115705926947e-82	1.73182759670572e-80	79.7614953441467	down-regulated
H4C15	1475.44644937037	-1.94434	0.101215114011992	-19.21	3.05408818881753e-82	4.21797343313781e-80	79.3748961599872	down-regulated
IGF2	423.500558529664	-4.36882	0.228535897907653	-19.1166	1.83802986523637e-81	2.49315622434562e-79	78.603250507198	down-regulated
PLIN4	670.992949726559	-2.97106	0.155734373601727	-19.0777	3.86643761780707e-81	5.2135136351827e-79	78.2828694862879	down-regulated
IL32	1842.95808674362	-1.54908	0.081306398425588	-19.0524	6.27428620304833e-81	8.36131192953598e-79	78.0777255743485	down-regulated
RPL3L	320.429874506405	-4.79318	0.252112634850639	-19.0121	1.35543216781193e-80	1.7957900139592e-78	77.745744447797	down-regulated
CTSV	1137.17514802765	-1.80275	0.0948934835258788	-18.9977	1.78342479672833e-80	2.34917250103152e-78	77.6290850915683	down-regulated
NRXN2	289.705993121145	-4.31282	0.229370990906315	-18.8028	7.16379056048144e-79	9.27548064160517e-77	76.032663576636	down-regulated
GFY	361.592630945405	-4.52418	0.240655273008724	-18.7994	7.63690837505784e-79	9.83219593507446e-77	76.0073494754558	down-regulated
RASA4B	758.233667401289	-2.3433	0.125424767577836	-18.6829	6.8188278915443e-78	8.63263611069509e-76	75.0638565654074	down-regulated
CACNA2D2	475.398286049345	-2.85287	0.152759833352147	-18.6755	7.82805146472798e-78	9.74784900427439e-76	75.0110912067256	down-regulated
HSPA1A	10708.8755386419	-1.3805	0.0742317203367763	-18.5972	3.38547755444833e-77	4.19284035384612e-75	74.3774916734332	down-regulated
THY1	480.910132070612	-3.14467	0.169182152680047	-18.5875	4.05757243140215e-77	4.99805192252931e-75	74.3011992364947	down-regulated
SERTAD1	3111.01392486622	-1.54882	0.0838013599358791	-18.482	2.88351124443363e-76	3.495183736072e-74	73.4565299891701	down-regulated
GSTM3	1165.07713649364	-2.02416	0.109915838674725	-18.4155	9.8629816264887e-76	1.18293487002329e-73	72.9270391660806	down-regulated
NATD1	931.226896211721	-2.43441	0.132503261309815	-18.3725	2.18275006859713e-75	2.59065148766622e-73	72.5865910073784	down-regulated
H2BC20P	1705.49667780819	-1.71385	0.0934923912685213	-18.3314	4.64761310091355e-75	5.40356159916418e-73	72.2673198933264	down-regulated
MXD1	744.562630450506	-2.33105	0.127341446822037	-18.3055	7.48133760769513e-75	8.6540467717846e-73	72.0627807619368	down-regulated
ULBP2	796.666305195986	-2.27272	0.124161575389866	-18.3046	7.61021745260085e-75	8.75866844999334e-73	72.0575619130985	down-regulated
LRRC32	269.349575677433	-4.22054	0.232839865757296	-18.1263	1.97458864196981e-73	2.22757059273307e-71	70.6521685240818	down-regulated
IFI6	591.574096751374	-2.60638	0.144402983942564	-18.0494	7.98214095771999e-73	8.91652098747662e-71	70.0498045638598	down-regulated
ENO3	4131.30173635428	-1.12054	0.0621055407149056	-18.0425	9.04347833311226e-73	1.00528187441445e-70	69.9977121478566	down-regulated
OASL	315.956585765703	-4.06146	0.225457873847022	-18.0143	1.50582970247772e-72	1.66576928446904e-70	69.7783851502405	down-regulated
STS	2014.46556294061	-1.57165	0.0872785920438958	-18.0072	1.70983099659647e-72	1.88230090581838e-70	69.7253109487672	down-regulated
DNAJB2	4705.02599972755	-1.03672	0.0577565002534397	-17.9499	4.81187285694735e-72	5.27177685885174e-70	69.2780429806258	down-regulated
ZNF385A	1835.76582681493	-1.53372	0.0854607517852651	-17.9464	5.11672607436492e-72	5.57894515706353e-70	69.2534479078317	down-regulated
TMEM229B	394.991279748967	-3.78077	0.21116755534277	-17.9041	1.09485917439685e-71	1.18807861267407e-69	68.9251548220476	down-regulated
VASN	771.086001721692	-2.31809	0.130065107158847	-17.8225	4.72761472772003e-71	5.03424693529365e-69	68.298065485648	down-regulated
SERPINB9	4848.98474425495	-1.07919	0.0610726661434038	-17.6706	7.0639624593433e-70	7.45248039460719e-68	67.1276991578012	down-regulated
ITGA7	824.835	-1.98558	0.112646551576539	-17.6267	1.53761991184491e-69	1.61471348161852e-67	66.7919045286835	down-regulated
HSPA6	341.652399334263	-4.0832	0.231653093521041	-17.6263	1.54660313947952e-69	1.61669689644309e-67	66.7913713953943	down-regulated
EMP1	2014.08510422323	-1.27896	0.0725867655419914	-17.6198	1.73631913633318e-69	1.79851093085275e-67	66.7450869183155	down-regulated
SLC43A2	841.391105352234	-2.13761	0.121837106175992	-17.5448	6.5198533369895e-69	6.54512853935316e-67	66.1840818199484	down-regulated
TUBB2B	2052.96898308387	-1.34578	0.076817552205372	-17.5192	1.02197084356841e-68	1.02143296417706e-66	65.9907901304934	down-regulated
C4B	485.445581542453	-3.21882	0.183751888977321	-17.5172	1.05872748543224e-68	1.05354942960829e-66	65.977345083689	down-regulated
FDXR	6070.68153805103	-1.06231	0.0608853531770973	-17.4478	3.57819290284279e-68	3.49956480128676e-66	65.4559859602644	down-regulated
ARHGAP45	2175.06513800305	-1.36189	0.0782232193278357	-17.4103	6.89006960446421e-68	6.70986778403976e-66	65.173286037391	down-regulated
PFKFB4	1598.89874414083	-1.48212	0.0854061104071226	-17.3538	1.84772561162763e-67	1.7917434569264e-65	64.7467241728084	down-regulated
DNAI1	261.511964446545	-5.36002	0.309506922955978	-17.3179	3.44557173440757e-67	3.29073684179713e-65	64.4827068465798	down-regulated
MPP2	1223.0029875158	-1.59616	0.0923011392631167	-17.293	5.31306642828531e-67	5.04475657365691e-65	64.2971597850798	down-regulated
UCN2	900.710641373794	-1.79324	0.103934125676528	-17.2537	1.05032801588914e-66	9.89044414300901e-65	64.0047842054173	down-regulated
ANO9	1017.06620143426	-2.2227	0.128855761236672	-17.2495	1.12845502098738e-66	1.05824004190373e-64	63.9754158095694	down-regulated
STK17A	3904.79289908743	-1.08091	0.0628785726784146	-17.1904	3.13355960743079e-66	2.90274619244442e-64	63.5371909359354	down-regulated
SORBS1	567.440759969583	-2.65901	0.154734734412763	-17.1843	3.48162205112678e-66	3.21211349397074e-64	63.493209118146	down-regulated
CABYR	2011.00675941536	-1.72194	0.100373147866652	-17.1554	5.72650076714408e-66	5.26191530168062e-64	63.2788561468069	down-regulated
COL26A1	344.839497531545	-3.14016	0.183145848339211	-17.1457	6.77323698344043e-66	6.19873591882091e-64	63.2076968652522	down-regulated
PARP16	2076.75713982468	-1.23598	0.0721000502724218	-17.1426	7.13727377494445e-66	6.50576779133737e-64	63.1867014419365	down-regulated
NYNRIN	423.325147481942	-3.33795	0.196208935481257	-17.0122	6.66488212332112e-65	5.93278647758756e-63	62.2267412817442	down-regulated
CGB7	270.309732760881	-3.82701	0.226315512029169	-16.9101	3.79157206224907e-64	3.33599784380432e-62	61.476774238737	down-regulated
PLA2G4C	392.984279119011	-2.94324	0.174406427176961	-16.8758	6.78295264896161e-64	5.89961545666172e-62	61.229176295221	down-regulated
GRAP	233.026265437752	-5.02068	0.297693581744378	-16.8653	8.10229593159217e-64	7.02034675624039e-62	61.1536414362174	down-regulated
KLC3	265.433635439554	-4.03422	0.239808894828754	-16.8226	1.66605996682364e-63	1.43811267136277e-61	60.8422070870865	down-regulated
ZCCHC12	221.231335987857	-5.02794	0.299665028569978	-16.7785	3.50345193902915e-63	3.00137830024798e-61	60.5226792617042	down-regulated
CILP	243.646758946287	-5.13854	0.308112193572129	-16.6775	1.9104376253817e-62	1.60645950580067e-60	59.7941302172827	down-regulated
NPTXR	2520.41246671598	-1.31152	0.0787002599089868	-16.6647	2.36723420113901e-62	1.9832548888072e-60	59.7026214664862	down-regulated
COL3A1	284.719269928803	-4.256	0.256234949918888	-16.6097	5.92492552488763e-62	4.89192763989635e-60	59.3105199755577	down-regulated
CHST11	3544.13718832113	-1.03408	0.062264113278281	-16.6079	6.10844993468034e-62	5.02524754915146e-60	59.2988425395627	down-regulated
VIL1	1428.68139119627	-1.50798	0.0909124815823359	-16.5872	8.6281404594177e-62	7.02207374247181e-60	59.153534614093	down-regulated
CEND1	548.997141301585	-2.80212	0.169098443593311	-16.5709	1.13096481205369e-61	9.17168189931651e-60	59.0375510162804	down-regulated
FCGRT	3096.51836181847	-1.10031	0.0665725024556634	-16.528	2.30610116735907e-61	1.85040258456967e-59	58.7327337736315	down-regulated
HELZ2	2439.26101661805	-1.38456	0.0841875159822281	-16.4461	8.94054615639769e-61	7.05795650467896e-59	58.1513210223484	down-regulated
FBP2	247.821362981035	-6.27793	0.383969350061961	-16.3501	4.34490417333025e-60	3.39081083225513e-58	57.4696964381191	down-regulated
CGN	918.455747931177	-1.83707	0.112720633810308	-16.2975	1.02776268832526e-59	7.9123838316068e-58	57.1016926531721	down-regulated
LSR	4776.91306695299	-1.07002	0.0664917738486767	-16.0926	2.87591655386195e-58	2.14171197481719e-56	55.669238935072	down-regulated
KDM4B	2653.97981930083	-1.07734	0.0672562742695864	-16.0185	9.49440878172338e-58	7.04751098755415e-56	55.1519642383609	down-regulated
GDPD3	264.690410229221	-3.34362	0.21024755507103	-15.9033	6.01364170939412e-57	4.39227138697671e-55	54.3573108338072	down-regulated
GLIPR1	2539.4871083391	-1.1773	0.0740428598411164	-15.9003	6.3084763184612e-57	4.5782661893342e-55	54.3392989601983	down-regulated
IFIT1	695.410222980556	-2.09303	0.131958302994556	-15.8613	1.1743179482422e-56	8.41520673098844e-55	54.074935210523	down-regulated
HES7	406.001079199984	-2.57765	0.163386373667354	-15.7764	4.5233493644172e-56	3.2211901661356e-54	53.4919836354208	down-regulated
TCN2	1490.68126484239	-1.3327	0.0845686784537074	-15.7587	5.98141107982601e-56	4.24624285629518e-54	53.3719951707605	down-regulated
RASD1	234.688505452677	-4.18836	0.266210561367534	-15.7333	8.94816834617785e-56	6.33263541219567e-54	53.1984155148196	down-regulated
HSPB1	24865.0943842449	-1.13515	0.0722574852723313	-15.7098	1.29525600601498e-55	9.10996724230536e-54	53.0404831846638	down-regulated
ATF5	4423.89582160921	-1.23789	0.0788607386362974	-15.6972	1.58050814750398e-55	1.10820368200987e-53	52.9553804112291	down-regulated
AP3B2	282.65668149339	-3.38954	0.216183427863346	-15.679	2.10529578156826e-55	1.47164049909134e-53	52.8321982690266	down-regulated
GIPR	588.879916832397	-2.59458	0.165663391997296	-15.6617	2.76210910463572e-55	1.92486062007458e-53	52.7156007124537	down-regulated
CEBPA	1692.14957736096	-1.26049	0.0812021739614364	-15.5229	2.42844017651297e-54	1.65191924604112e-52	51.7820111869526	down-regulated
LRRC4B	303.308241334708	-3.0923	0.199293015005103	-15.5163	2.69000263442003e-54	1.81898457071702e-52	51.7401709847633	down-regulated
GRIK5	337.249430782779	-3.0351	0.19591920539381	-15.4916	3.95395712330831e-54	2.65008161546911e-52	51.5767407507417	down-regulated
SMPD1	1981.83664279219	-1.16157	0.0749800942688871	-15.4917	3.94628370377491e-54	2.65008161546911e-52	51.5767407507417	down-regulated
BST2	228.00427028339	-4.06489	0.265182011968447	-15.3287	4.91867932300141e-53	3.18428592081126e-51	50.4969879433667	down-regulated
TRIML2	2522.55341095796	-1.23204	0.0804520544506063	-15.314	6.16944863913588e-53	3.98270242460704e-51	50.3998221415392	down-regulated
CHGA	231.035319453843	-4.08597	0.266852650575743	-15.3117	6.3877479528615e-53	4.11197741101152e-51	50.3859492797861	down-regulated
ACTA2	2569.57159056576	-1.0722	0.0701425427525745	-15.286	9.47753695580264e-53	6.04969501817452e-51	50.2182665187793	down-regulated
NECTIN4	365.13066906939	-2.95013	0.193991994930778	-15.2075	3.15378176616754e-52	1.98531433390679e-50	49.7021707218109	down-regulated
TP53INP2	1262.6	-1.69132	0.111418312406477	-15.1799	4.80163808302764e-52	2.99780078454887e-50	49.5231972310761	down-regulated
RHBDD2	7372.75553549126	-1.00258	0.0660661040397906	-15.1754	5.14751805223046e-52	3.20496287907726e-50	49.494176996256	down-regulated
H2AC6	2366.03776055921	-1.24342	0.0819966974545887	-15.1643	6.0984069617002e-52	3.76613815293291e-50	49.4241037528388	down-regulated
SLC9A1	3656.1369690947	-1.15261	0.0761473750069635	-15.1365	9.29899124341322e-52	5.69638205523926e-50	49.2444008903477	down-regulated
CDKN2D	860.770906588259	-1.98861	0.131663649494315	-15.1037	1.53072752112298e-51	9.30192500036009e-50	49.0314271664436	down-regulated
TMEM200B	216.803350705747	-5.06856	0.335965198898372	-15.0865	1.98562828317698e-51	1.20341748183609e-49	48.9195836838783	down-regulated
STING1	286.587323159817	-3.15889	0.210515217772403	-15.0055	6.75768032141931e-51	4.03125704619119e-49	48.3945595089213	down-regulated
LYPD5	175.40871691797	-5.1993	0.347277786740859	-14.9716	1.12606860166577e-50	6.68251335801029e-49	48.1750601644376	down-regulated
NPAS1	458.480412693803	-2.46554	0.16515744893505	-14.9284	2.15274459180606e-50	1.26109881126161e-48	47.8992508836851	down-regulated
LFNG	1794.66096524483	-1.23029	0.0826081976613831	-14.8931	3.65339562037818e-50	2.1347071640302e-48	47.6706616924274	down-regulated
H4C8	524.896950876616	-2.04239	0.137858301814197	-14.8151	1.17000798932935e-49	6.76704113219217e-48	47.1696011837308	down-regulated
SLC4A8	501.760860709635	-2.06909	0.139749490766853	-14.8057	1.34560466296516e-49	7.76294659737976e-48	47.1099734014114	down-regulated
LIMA1	1134.02152260417	-1.47321	0.0999164410820414	-14.7444	3.34137624920879e-49	1.90835293150301e-47	46.7193413036204	down-regulated
UBALD2	1542.48960502376	-1.19975	0.081642332109014	-14.6952	6.92256746189243e-49	3.90473929013873e-47	46.4084079575956	down-regulated
TSPYL2	1999.76194090122	-1.15014	0.0784202667647343	-14.6663	1.05915030911062e-48	5.95948573926243e-47	46.2247912151317	down-regulated
FAS	1517.87860455546	-1.39349	0.0952596298643164	-14.6283	1.8528865287252e-48	1.03998961124606e-46	45.9829709989715	down-regulated
ENSG00000280287	387.05175332234	-2.50241	0.171107258378349	-14.6248	1.95070610343548e-48	1.09220370233631e-46	45.9616963556328	down-regulated
KCP	204.661966327084	-3.48253	0.240470871757891	-14.4821	1.5711868946732e-47	8.64835916807077e-46	45.0630662823443	down-regulated
HAPLN3	1135.02228385264	-1.6578	0.114742151082615	-14.448	2.57945729133816e-47	1.40960845935286e-45	44.8509015026329	down-regulated
DLX3	187.907543770134	-5.88382	0.409748720249736	-14.3596	9.27893772894689e-47	5.01062637363132e-45	44.3001079799995	down-regulated
SYT12	2082.52257195504	-1.04272	0.0730065126253399	-14.2825	2.81230635766833e-46	1.50086269973175e-44	43.823659035589	down-regulated
SDC4	3227.84397926754	-1.05964	0.0746342161734802	-14.1977	9.46428970444088e-46	4.94661086662383e-44	43.3056922527903	down-regulated
VDR	817.193482248318	-1.71164	0.120875377461337	-14.1603	1.61231330238401e-45	8.36933839059836e-44	43.0773088723137	down-regulated
SPINT1	405.05887432267	-2.27876	0.161036806748752	-14.1505	1.8536467135913e-45	9.60020484302693e-44	43.0177195001639	down-regulated
H1-2	1501.44230398318	-1.19106	0.0846587950811016	-14.069	5.8932772654306e-45	2.95806172521217e-43	42.5289927679188	down-regulated
SEMA6B	1808.15365170164	-1.41672	0.10109688076882	-14.0135	1.28930153944039e-44	6.40100293698641e-43	42.1937519735359	down-regulated
ANKRD1	1275.93576792223	-1.23602	0.0887707946941111	-13.9237	4.54857252427376e-44	2.23872290892334e-42	41.649999656565	down-regulated
GPX3	1572.12758851843	-1.22459	0.088535453625092	-13.8316	1.64266037337733e-43	7.99849243344501e-42	41.0969918616998	down-regulated
MYORG	2559.32310752217	-1.02102	0.0740430218135082	-13.7896	2.94431959996852e-43	1.42150752212039e-41	40.847250837833	down-regulated
HPCAL4	177.981578561222	-6.34392	0.461347627557595	-13.7508	5.03410240226263e-43	2.4253092080922e-41	40.6152328843576	down-regulated
HTRA3	397.599933017263	-2.65047	0.19282605914394	-13.7454	5.42847447413087e-43	2.60979063958849e-41	40.583394330868	down-regulated
C1QL4	362.899728591669	-2.33139	0.170598143192431	-13.666	1.62077712985881e-42	7.71070338939928e-41	40.1129060027271	down-regulated
HSPA4L	3734.59848851093	-1.05864	0.0776242570587876	-13.638	2.37929109157552e-42	1.12488143972662e-40	39.9488932489178	down-regulated
ALPL	158.43248141897	-5.73225	0.42048391424844	-13.6325	2.56628011358034e-42	1.21077414551281e-40	39.9169368614031	down-regulated
VAMP1	2443.49507788176	-1.09122	0.0802863906547059	-13.5917	4.48825254703579e-42	2.10017041153699e-40	39.6777454644149	down-regulated
ABCD1	2491.41927171473	-1.23709	0.0910650493452516	-13.5847	4.93831024336751e-42	2.30602897184137e-40	39.6371352407396	down-regulated
KCNC3	311.689352844623	-2.4507	0.180973202534591	-13.5418	8.86286864142691e-42	4.12177654287421e-40	39.3849155566682	down-regulated
TPPP	857.320295824844	-1.4128	0.104442248879352	-13.5271	1.08268017398702e-41	5.00448596446577e-40	39.3006405244306	down-regulated
H2AC11	254.036208275215	-2.67626	0.197889762307924	-13.524	1.12856328757253e-41	5.2060121856686e-40	39.2834948196762	down-regulated
PDGFB	620.79111362378	-1.85732	0.137458104981717	-13.5119	1.33016670993587e-41	6.11136968054511e-40	39.2138614447428	down-regulated
HLA-E	898.103881244905	-1.4571	0.107844375094958	-13.5111	1.34413984565491e-41	6.16302994019801e-40	39.2102057224476	down-regulated
S100A2	592.495600949436	-2.12791	0.158407477397233	-13.4332	3.86504340334038e-41	1.74755176736747e-39	38.7575699503754	down-regulated
CGREF1	1220.84125936155	-1.33874	0.10000519194044	-13.3867	7.23306947145952e-41	3.25745429082252e-39	38.4871	down-regulated
NEU1	485.140653057463	-1.92108	0.143599336704626	-13.378	8.12670000998535e-41	3.65268717608572e-39	38.4373875201005	down-regulated
PODNL1	180.460460089799	-3.55147	0.265747105694347	-13.3641	9.80405193908851e-41	4.37210832853129e-39	38.3593090859949	down-regulated
KREMEN2	521.354331847026	-2.17591	0.163557084474973	-13.3036	2.20446134813085e-40	9.69792764502044e-39	38.0133210604232	down-regulated
FIBCD1	612.151942777221	-1.77665	0.134356642271724	-13.2234	6.43018351496873e-40	2.78576087336706e-38	37.5550561656702	down-regulated
SELPLG	221.296957983964	-3.23719	0.244997676943511	-13.2131	7.36836327228579e-40	3.18615298384912e-38	37.4967333752874	down-regulated
RNF223	149.467640263583	-5.16522	0.391649885713123	-13.1884	1.02380717587046e-39	4.41030584569678e-38	37.3555312920531	down-regulated
CACNA1A	147.81997084279	-4.57202	0.346828338506286	-13.1824	1.1083265019485e-39	4.75641136090439e-38	37.3227205922272	down-regulated
IRF7	593.459555166159	-2.2109	0.167828255894945	-13.1736	1.24555610804803e-39	5.32527815951192e-38	37.2736577024458	down-regulated
C4A	410.556343948005	-3.09657	0.235196849477062	-13.1659	1.37936026490735e-39	5.88630369226753e-38	37.2301573350883	down-regulated
RTL5	967.508683361664	-1.35114	0.102736637333034	-13.1515	1.66918038297567e-39	7.07012687123598e-38	37.1505727928533	down-regulated
CYP26A1	327.896383217831	-3.10219	0.236516649877272	-13.1162	2.66031609782248e-39	1.12265339328109e-37	36.9497543066238	down-regulated
ANKRD24	180.467916371382	-3.30624	0.253593072426572	-13.0376	7.47862182852073e-39	3.12702448125377e-37	36.5048687186829	down-regulated
NEURL1B	2078.69323227754	-1.04419	0.0802436300700774	-13.0127	1.03594642587881e-38	4.30787356805223e-37	36.3657370513125	down-regulated
FAM43A	325.420161969373	-2.62634	0.201857661218755	-13.0109	1.06134292151785e-38	4.40544307751345e-37	36.3560104058803	down-regulated
IFI30	5092.73090152002	-2.60398	0.200143389319392	-13.0106	1.06552850459229e-38	4.41477519320892e-37	36.3550914064317	down-regulated
SAMD9	878.488481332552	-1.44005	0.111125617590067	-12.9588	2.09525376717812e-38	8.58752569180847e-37	36.066131950626	down-regulated
WNT11	204.773460239112	-3.79531	0.293388627544927	-12.9361	2.81526909614491e-38	1.14766282939088e-36	35.9401856841008	down-regulated
SYT5	157.455606237939	-3.58339	0.278092768623847	-12.8856	5.42491589400288e-38	2.19189686866201e-36	35.6591798837756	down-regulated
EFNB3	284.919656797779	-2.58708	0.200878572268987	-12.8788	5.92379076491181e-38	2.38922732656301e-36	35.6217425266942	down-regulated
SMIM24	178.574197088096	-6.85594	0.532656969972158	-12.8712	6.5372319369579e-38	2.63198659680913e-36	35.579716326664	down-regulated
ADM	2289.11414069896	-1.10843	0.086285493005062	-12.8461	9.04523369365178e-38	3.62254455906743e-36	35.4409862637897	down-regulated
AIF1L	349.430132678731	-2.72981	0.213067944163961	-12.8119	1.40640031678286e-37	5.61279341836214e-36	35.2508209419094	down-regulated
TG	152.898424689624	-3.93319	0.310014594118634	-12.6871	6.9721772099601e-37	2.71593118394138e-35	34.5660812383728	down-regulated
NRARP	434.252321165742	-1.88465	0.148888001999946	-12.6582	1.00841790287856e-36	3.91479168156672e-35	34.4072913431726	down-regulated
NGFR	1758.30607006372	-7.56588	0.597873983274198	-12.6546	1.05454996654159e-36	4.08691915604588e-35	34.388603953047	down-regulated
ERFE	540.978149069306	-2.09636	0.165662784671613	-12.6544	1.0576680970436e-36	4.09204424370621e-35	34.388059679287	down-regulated
CRLF1	433.202205460259	-2.04435	0.162005133369232	-12.619	1.65840716836266e-36	6.38374705281221e-35	34.1949243296373	down-regulated
AATK	267.311129797102	-2.42963	0.192765341840239	-12.6041	2.00447348337078e-36	7.67696499816022e-35	34.1148104394818	down-regulated
SEMA4A	146.551794566545	-3.96396	0.31894586840519	-12.4283	1.83440237855708e-35	6.7532086272308e-34	33.1704898333902	down-regulated
ESPN	140.388181124556	-3.67725	0.296109840470917	-12.4185	2.07310401807352e-35	7.59515986557224e-34	33.1194630805234	down-regulated
CDH3	120.805965266653	-5.05495	0.407520836774719	-12.4041	2.4816457590501e-35	9.03382484939835e-34	33.0441283339293	down-regulated
PLXNB3	688.751102704022	-1.45639	0.117606224557409	-12.3836	3.20561681217642e-35	1.1595173954901e-33	32.9357227315377	down-regulated
FAM117A	318.490618413906	-2.21385	0.178878979594139	-12.3763	3.51289742306491e-35	1.26664408982283e-33	32.8973453989603	down-regulated
INSYN1	187.616661890476	-3.64256	0.294412853079609	-12.3723	3.6920177060123e-35	1.32912637416443e-33	32.8764337241039	down-regulated
BBC3	1056.4479585827	-1.29353	0.104931190151175	-12.3274	6.44737755254626e-35	2.31010754194063e-33	32.6363678020194	down-regulated
OTOF	136.629262236839	-4.69241	0.383085528647709	-12.249	1.70087080562893e-34	5.96299137210338e-33	32.2245358190377	down-regulated
QPRT	305.961343627328	-2.24954	0.184401944216106	-12.1991	3.14197550931645e-34	1.09646765553297e-32	31.9600041749584	down-regulated
MDK	892.627057800297	-1.76765	0.144988786052856	-12.1916	3.44410042646221e-34	1.20006361648656e-32	31.9207957309884	down-regulated
VGF	411.61990812467	-2.15754	0.177133900339981	-12.1803	3.9591656806642e-34	1.37742698520574e-32	31.8609314129935	down-regulated
PLXDC1	129.967536222392	-4.33263	0.35636000952607	-12.158	5.2007820780603e-34	1.79297158842418e-32	31.7464265922495	down-regulated
DNAH12	172.369335885851	-7.23012	0.594824283512941	-12.155	5.39298716070579e-34	1.8536258132453e-32	31.7319779312725	down-regulated
HBA1	156.005325778753	-6.83043	0.562447894038672	-12.1441	6.16541802981552e-34	2.11592689854572e-32	31.674499340468	down-regulated
ZNF425	383.235701538752	-1.99583	0.164575189257579	-12.1271	7.58450296319963e-34	2.5990323838405e-32	31.5851883091732	down-regulated
SEMA3G	176.895915903706	-3.3907	0.279966551472535	-12.1111	9.22430280012332e-34	3.14316976570351e-32	31.502632161675	down-regulated
CLDN7	214.894545779423	-2.99587	0.247901238910001	-12.0849	1.26880205675849e-33	4.28983104887427e-32	31.3675598117748	down-regulated
APOE	291.740400762593	-2.53423	0.210315611246089	-12.0496	1.94794493325449e-33	6.54716358982351e-32	31.1839468075017	down-regulated
PIK3R3	694.596475170732	-1.42878	0.119262805038548	-11.9801	4.51825562402552e-33	1.49436878316826e-31	30.8255422132763	down-regulated
RASA4	255.665852149882	-2.81109	0.235106556466589	-11.9567	5.99072664212052e-33	1.96993764387651e-31	30.705547520716	down-regulated
FAM222A	665.273367894003	-1.4902	0.124929160101953	-11.9284	8.42182052593274e-33	2.75742020323212e-31	30.5595	down-regulated
RFPL4A	300.973324424589	-8.81586	0.740231175737971	-11.9096	1.0547665373127e-32	3.43862944953959e-31	30.4636146217037	down-regulated
ZNF296	623.392822505267	-1.51951	0.127686218081249	-11.9004	1.17838452656318e-32	3.82883988932782e-31	30.4169327941734	down-regulated
CDC42BPG	1128.22455685634	-1.41536	0.119151728273423	-11.8786	1.52871535957059e-32	4.92735015755228e-31	30.3073865738953	down-regulated
HES6	705.543768667824	-1.41468	0.119141793869309	-11.8739	1.61728049925307e-32	5.19810832397447e-31	30.2841546744283	down-regulated
VWF	123.150166348656	-6.06482	0.511018872569355	-11.8681	1.73369929804188e-32	5.56444219771526e-31	30.2546	down-regulated
NKPD1	167.871146894991	-3.02236	0.255338619563187	-11.8367	2.52304521087371e-32	8.03004947840643e-31	30.0952817787397	down-regulated
RUNDC3A	163.023805043784	-3.49248	0.296457402853079	-11.7807	4.9084361115626e-32	1.54493704572222e-30	29.8110892128427	down-regulated
PSG1	133.118341955232	-3.67861	0.312808295693033	-11.76	6.27693065465423e-32	1.96212202686228e-30	29.7072739867904	down-regulated
ENSG00000285897	231.05233711085	-2.63396	0.22400406210975	-11.7585	6.38365570593966e-32	1.99274994831443e-30	29.7005471934622	down-regulated
PPFIA3	1141.91636013268	-1.12167	0.095528928133448	-11.7416	7.79603763352695e-32	2.43031608198102e-30	29.6143372392687	down-regulated
BMF	171.057999176373	-3.4328	0.293017820018236	-11.7153	1.06395515653153e-31	3.29421332976095e-30	29.4822482798056	down-regulated
AMIGO3	562.415732444393	-2.22684	0.190387847533152	-11.6964	1.33043927438254e-31	4.09703380873371e-30	29.3875304522329	down-regulated
H2BC19P	593.230953821031	-1.77665	0.152015979372246	-11.6873	1.48043067855329e-31	4.54663804620922e-30	29.3423096182143	down-regulated
TMEM132B	148.317640805274	-4.4409	0.380070734558635	-11.6844	1.53167712962475e-31	4.6976929246149e-30	29.3281153752774	down-regulated
TRIM54	111.780240728781	-4.92803	0.421828420816974	-11.6826	1.56522116394046e-31	4.79412095213376e-30	29.3192910132349	down-regulated
HDAC5	1041.49111242062	-1.37366	0.117584817911247	-11.6823	1.56936734147634e-31	4.80036818490776e-30	29.3187254512616	down-regulated
FOSL1	2121.79810287057	-1.06219	0.0914047830881809	-11.6208	3.23280772166573e-31	9.79643914379239e-30	29.0089317550448	down-regulated
EPCAM	1016.10262475561	-1.51707	0.130662415695961	-11.6106	3.64033620211803e-31	1.09875472018365e-29	28.9590992462114	down-regulated
CD70	762.04364964527	-1.39803	0.121222861595725	-11.5327	9.02659796608213e-31	2.68886424119058e-29	28.5704311244372	down-regulated
BVES	591.527425158972	-1.45451	0.126290889653944	-11.5172	1.08094244483258e-30	3.20735891052667e-29	28.4938524388431	down-regulated
COL8A2	112.951285060129	-4.89067	0.424674864992437	-11.5163	1.09226477459455e-30	3.23673988081412e-29	28.4898922010813	down-regulated
NKD2	674.374	-1.51003	0.131153491351646	-11.5134	1.1287685723537e-30	3.33623582708122e-29	28.4767432581601	down-regulated
ARID3A	1058.53612198242	-1.15763	0.100644557463178	-11.5021	1.28706325526627e-30	3.7893536771328e-29	28.4214348582091	down-regulated
ATP2A1	426.322090367123	-1.75454	0.152736469190866	-11.4874	1.52721621466045e-30	4.48481998707246e-29	28.3482549841004	down-regulated
HIC1	473.062191327504	-2.13168	0.185616848861473	-11.4843	1.58233355017133e-30	4.63473225466636e-29	28.333975349692	down-regulated
PLAT	384.233425739023	-1.78776	0.155772769231423	-11.4767	1.72767986723214e-30	5.04748318134435e-29	28.2969251194891	down-regulated
RYR1	368.174776780564	-1.86774	0.162853130907988	-11.4689	1.89105287343709e-30	5.50361594889967e-29	28.2593518794769	down-regulated
CYP2C9	105.235490941809	-4.62022	0.40319	-11.4592	2.1151672481784e-30	6.14018232503051e-29	28.2118187328362	down-regulated
SLC25A45	1109.29938035511	-1.14138	0.0997512210515448	-11.4423	2.56972826020667e-30	7.42192238195053e-29	28.1294835917909	down-regulated
TCHH	169.514501865863	-3.27755	0.286607799887304	-11.4357	2.77425359377691e-30	8.00249251835294e-29	28.0967747232119	down-regulated
GCGR	110.396111610331	-5.50096	0.481193240799074	-11.4319	2.89637036497194e-30	8.3231384460253e-29	28.0797128813078	down-regulated
ARHGAP4	298.972133709742	-2.2459	0.196552921051789	-11.4264	3.08547626369024e-30	8.84425573546832e-29	28.0533387080995	down-regulated
ENSG00000173727	835.734276329749	-1.18306	0.103807140521031	-11.3967	4.34186693221289e-30	1.23523674970371e-28	27.9082497960594	down-regulated
H2AW	452.571530162929	-2.041	0.179619855304557	-11.3629	6.40116393061338e-30	1.8120462565319e-28	27.7418307201801	down-regulated
ELFN1	115.574299114862	-4.11077	0.362518502082725	-11.3395	8.36415056698791e-30	2.35893890000644e-28	27.6272833078358	down-regulated
GCH1	891.06977708443	-1.52399	0.134448279606808	-11.3352	8.78697371697562e-30	2.47512431473968e-28	27.6064029834578	down-regulated
DNAAF3	813.061698399963	-1.54311	0.136440224684609	-11.3098	1.17344064540483e-29	3.28102643282028e-28	27.4839902708082	down-regulated
LGALS7	114.513860827578	-5.71268	0.505137069663505	-11.3092	1.18208504399809e-29	3.30114632140055e-28	27.4813352253914	down-regulated
DUSP9	376.398458385499	-1.81451	0.160468740606922	-11.3076	1.20366314527795e-29	3.35729201402617e-28	27.4740108825933	down-regulated
CDH15	108.265649085464	-5.51701	0.488083015166446	-11.3034	1.26199080369528e-29	3.51567804824059e-28	27.4539909027321	down-regulated
GPER1	139.459036311755	-3.2709	0.290793013525411	-11.2482	2.36358679133434e-29	6.52865646071842e-28	27.1851761834616	down-regulated
FAM214A	1332.05224353187	-1.19165	0.10642520281889	-11.1971	4.21497411465687e-29	1.1530711899736e-27	26.9381438787779	down-regulated
H2BC18	149.251978081666	-2.92797	0.262363243139486	-11.16	6.40035601426873e-29	1.74672230961863e-27	26.7577761327882	down-regulated
NXPH3	95.9009582936714	-4.66342	0.417916124456239	-11.1587	6.48983805665109e-29	1.76691074832694e-27	26.7527853873852	down-regulated
SRCIN1	380.104877706805	-1.84181	0.165675318357018	-11.117	1.03707281536197e-28	2.79678287768859e-27	26.5533412478515	down-regulated
PLEKHA4	134.021758568419	-3.61982	0.326253251910094	-11.0951	1.32489922120011e-28	3.56035418074389e-27	26.4485067966643	down-regulated
NDRG4	1632.99983482566	-1.05513	0.0951366265609393	-11.0907	1.39259642255709e-28	3.72908193621987e-27	26.4283980741187	down-regulated
TEX19	174.020726591518	-2.71632	0.245597662975528	-11.06	1.96050737380761e-28	5.21916378905698e-27	26.2823990737965	down-regulated
ZMAT1	235.860825109581	-2.3542	0.213178743534973	-11.0433	2.3616415748568e-28	6.26508593804852e-27	26.2030729674209	down-regulated
IRF9	526.542204321091	-1.81851	0.165073013133196	-11.0164	3.18636553327083e-28	8.41377726212927e-27	26.0750089892418	down-regulated
PLK3	1137.86899118632	-1.04996	0.095316665637395	-11.0155	3.21915012328966e-28	8.49050845017646e-27	26.0710663014529	down-regulated
RCOR2	307.186279586822	-1.86532	0.170354483957066	-10.9496	6.6707500340426e-28	1.7293862545593e-26	25.7621079971892	down-regulated
ALOXE3	232.330822635069	-2.40098	0.219387805354593	-10.944	7.10041530545337e-28	1.83868481796217e-26	25.735492709887	down-regulated
ENSG00000188897	193.419748444676	-2.64246	0.241478644195534	-10.9428	7.19071905092665e-28	1.85995579719088e-26	25.7304973768919	down-regulated
SORCS2	450.871664719985	-1.7141	0.157049232523326	-10.9144	9.83452989284555e-28	2.52944996837657e-26	25.5969739063613	down-regulated
BTG2	1365.68795038392	-1.16004	0.107047357466618	-10.8367	2.30697352615396e-27	5.84775447319205e-26	25.2330108701775	down-regulated
FOXO4	645.421172006564	-1.31451	0.121853076401304	-10.7876	3.93762440906039e-27	9.91498177167604e-26	25.0037080798921	down-regulated
LOXL4	582.115862859706	-1.63455	0.151646327948107	-10.7787	4.33926412237626e-27	1.08662803099682e-25	24.9639190959614	down-regulated
ALPG	608.492214308298	-12.6621	1.18535378315023	-10.6821	1.23421693675535e-26	3.03357868466711e-25	24.5180447358861	down-regulated
PINLYP	185.187108195099	-3.58057	0.33564483344499	-10.6677	1.44114889319409e-26	3.51615642163885e-25	24.453931812909	down-regulated
LYNX1	857.166473324365	-1.39638	0.1309961238741	-10.6597	1.57054165974225e-26	3.82366488698785e-25	24.417520177094	down-regulated
HOXC13	1701.16936099096	-1.13249	0.106264681455575	-10.6572	1.61358675925187e-26	3.92427055174296e-25	24.4062410586115	down-regulated
SHBG	121.862417023754	-3.22594	0.302782625713785	-10.6543	1.66465459874957e-26	4.03984547351494e-25	24.3936352465932	down-regulated
ENTPD8	177.651969584213	-2.54197	0.239339789180886	-10.6208	2.38604942154133e-26	5.76599090329627e-25	24.2391260471111	down-regulated
EGLN3	1508.88344352715	-1.08531	0.102401469204871	-10.5986	3.02446225598809e-26	7.2778717940292e-25	24.1379955991532	down-regulated
SERPINF1	384.392806607172	-1.62646	0.153634636470295	-10.5866	3.43964436133393e-26	8.25949585943915e-25	24.0830464602033	down-regulated
PDE2A	235.540967872034	-3.12527	0.296078466220996	-10.5556	4.78768493515901e-26	1.13884931422133e-24	23.9435337353866	down-regulated
PARP10	690.678572516001	-1.33156	0.12616898766275	-10.5538	4.88057882601653e-26	1.15973545659296e-24	23.9356410649493	down-regulated
FXYD3	187.826	-2.4204	0.22961566232245	-10.5411	5.58347336444369e-26	1.32262152836739e-24	23.8785644125446	down-regulated
SLC6A3	86.6297776559935	-4.96126	0.471209571268847	-10.5288	6.36616560898178e-26	1.50646087120952e-24	23.822042144202	down-regulated
MFSD2A	605.576683024336	-1.30165	0.123656884283159	-10.5263	6.53435475801062e-26	1.54465639238118e-24	23.8111681139668	down-regulated
PPM1D	1612.28620745924	-1.00576	0.0955842014093268	-10.5223	6.82188099526995e-26	1.60928596397734e-24	23.7933667765707	down-regulated
KLHL30	130.563934348271	-3.41204	0.324675522987249	-10.5091	7.8469283087769e-26	1.83777802980892e-24	23.7357069446641	down-regulated
TNFRSF1B	181.101410123273	-3.07397	0.292516885716132	-10.5087	7.87729683749503e-26	1.84299630731865e-24	23.7344755349452	down-regulated
CHRNB4	146.181078676466	-2.80039	0.267040840125288	-10.4867	9.93977577096024e-26	2.31366302623741e-24	23.6356998936567	down-regulated
H3C6	378.083720861732	-1.64277	0.156977852101595	-10.465	1.25114898133791e-25	2.89747794580573e-24	23.5379798609904	down-regulated
CATSPERG	182.517942369371	-2.4933	0.238829863359366	-10.4397	1.63382310998882e-25	3.76456633270224e-24	23.4242850460667	down-regulated
TSPEAR	163.16440273146	-2.91833	0.279781935107199	-10.4307	1.79497598548926e-25	4.12753912788387e-24	23.3843088010589	down-regulated
TUBA4B	123.743223659042	-3.48132	0.334669855868556	-10.4023	2.42105617137638e-25	5.53370391507773e-24	23.256984081821	down-regulated
KLRC2	375.194351533517	-2.05546	0.197610790889038	-10.4015	2.43952678289792e-25	5.57033430147072e-24	23.2541187400278	down-regulated
ICAM5	185.280862223335	-2.50773	0.241536340358945	-10.3824	2.98189057221395e-25	6.76132560792155e-24	23.1699681490634	down-regulated
DISP3	109.343087786578	-3.51297	0.339138684331489	-10.3585	3.82936043483354e-25	8.65708984017724e-24	23.0626280755068	down-regulated
CHRD	115.712942519585	-3.62313	0.350192967209746	-10.3461	4.35913501564152e-25	9.81580718739516e-24	23.0080739810749	down-regulated
ENSG00000250644	1232.77423064962	-1.51618	0.146664582668852	-10.3377	4.75722693740244e-25	1.0691093436837e-23	22.970977874838	down-regulated
EGR1	238.141187036254	-2.52732	0.244648740157924	-10.3304	5.13519521378519e-25	1.15064728153134e-23	22.9390577842422	down-regulated
SLFN5	677.949448151198	-1.38476	0.134192145558078	-10.3192	5.76732115745385e-25	1.2897518600202e-23	22.8894938371349	down-regulated
POU2F2	140.736483703396	-3.14092	0.304709403454539	-10.3079	6.48936630606969e-25	1.44507206475072e-23	22.8401	down-regulated
NXPH4	547.366010423854	-1.89617	0.184138932464347	-10.2975	7.23120116219064e-25	1.60140536524782e-23	22.7954987207935	down-regulated
IFITM10	95.7030037116025	-3.90623	0.37935837120704	-10.2969	7.27342966478109e-25	1.60763254317198e-23	22.7938132110039	down-regulated
NR1D1	1116.29141460336	-1.20052	0.116679950471529	-10.289	7.89607554540916e-25	1.73850985051965e-23	22.7598228442305	down-regulated
TMPRSS9	205.177532212315	-2.55988	0.24922509063945	-10.2714	9.48664339105992e-25	2.07269060014836e-23	22.6834655221593	down-regulated
EID3	602.904070791946	-1.42172	0.138463479759128	-10.2679	9.83568193044743e-25	2.14074039953234e-23	22.6694359949598	down-regulated
MLXIPL	841.931939207139	-1.25116	0.121958168779458	-10.2589	1.07936031789211e-24	2.34475337694237e-23	22.6299028299918	down-regulated
ELAPOR1	373.938411398796	-1.71697	0.167903753004967	-10.2259	1.51747264672119e-24	3.27463699559493e-23	22.4848368359921	down-regulated
ISM2	111.592130352807	-3.51812	0.344087676635434	-10.2245	1.54026213970801e-24	3.32067111065905e-23	22.4787741361147	down-regulated
GRIN3B	542.066716622205	-1.6123	0.157943250411797	-10.2081	1.82436480092534e-24	3.92574363394586e-23	22.4060780648985	down-regulated
KCNN3	86.4716282674146	-5.44449	0.535592082127931	-10.1654	2.83047106465193e-24	6.01125578949564e-23	22.2210347916449	down-regulated
KCNK6	1408.33	-1.12335	0.110670816718608	-10.1503	3.30186909556026e-24	6.97340064408036e-23	22.1565553824769	down-regulated
KCNH3	787.772664536877	-1.09696	0.108117232574923	-10.1461	3.45016092994691e-24	7.26638329682349e-23	22.1386816971277	down-regulated
PYGM	134.834062357607	-2.96123	0.291984085320586	-10.1418	3.60527397146466e-24	7.57905749647017e-23	22.120384798264	down-regulated
POLR2A	14024.803666978	-2.10467	0.207644691561963	-10.1359	3.82766675175273e-24	8.03915851971808e-23	22.0947894076407	down-regulated
ADAM33	85.6884941008671	-4.56237	0.451125432693591	-10.1133	4.82337046416545e-24	1.01117724137445e-22	21.9951727136431	down-regulated
SNAI1	423.645412179813	-1.74349	0.172550907557186	-10.1042	5.29232619667491e-24	1.107452060329e-22	21.9556750645498	down-regulated
CDHR5	189.693117771138	-2.89188	0.286224315446584	-10.1036	5.32757618963759e-24	1.11380556155469e-22	21.9531906178823	down-regulated
SLC7A8	128.282845379775	-3.12628	0.309629204111868	-10.0969	5.70414916689507e-24	1.19144043276998e-22	21.9239276657523	down-regulated
ALDOC	467.411413455039	-1.52476	0.151218386713686	-10.0831	6.55963832479394e-24	1.36637146385196e-22	21.8644312166353	down-regulated
TNXB	115.693543091635	-3.34114	0.331591114587953	-10.0761	7.04792335772782e-24	1.46540216675093e-22	21.8340431706466	down-regulated
CRYAB	418.037694165657	-1.89529	0.188134879874162	-10.0741	7.1921409021206e-24	1.49266399706306e-22	21.8260379422041	down-regulated
HPD	293.021126433569	-2.001	0.199011795175828	-10.0547	8.76193281355882e-24	1.81185957309781e-22	21.7418754650433	down-regulated
DGKH	1092.85305356757	-1.00358	0.10004750882854	-10.0311	1.11322095608568e-23	2.28953782917695e-22	21.6402521763918	down-regulated
LRRC37A11P	136.811378854816	-7.70616	0.771659048525037	-9.98648	1.74670171135881e-23	3.55709013390925e-22	21.448905129989	down-regulated
NTN1	103.44476050674	-3.51854	0.352631595019094	-9.97796	1.90335680023136e-23	3.87265131818501e-22	21.4119916038157	down-regulated
APOLD1	278.047952444035	-2.13377	0.215176033376542	-9.9164	3.53258481106099e-23	7.09255882594342e-22	21.1491970534628	down-regulated
GABPB2	1318.40413144886	-1.0107	0.101978024820435	-9.91093	3.73162857006206e-23	7.46587812595033e-22	21.1269191038364	down-regulated
PRPH	115.278154588265	-2.94148	0.297159836834409	-9.89865	4.21934634434016e-23	8.40476088241464e-22	21.0754746378372	down-regulated
CFAP70	191.064917253831	-2.65617	0.268928335380525	-9.87685	5.24542880582832e-23	1.04032055376167e-21	20.9828328210094	down-regulated
PLEKHO2	1007.38970048252	-1.14337	0.115780340589441	-9.87533	5.32568714517307e-23	1.0553196405583e-21	20.9766159791288	down-regulated
FOSB	183.269130538105	-3.6772	0.372387261623755	-9.87465	5.36174651443307e-23	1.06154195978193e-21	20.9740628347136	down-regulated
HRNR	443.281687367793	-1.70002	0.172234352643989	-9.87036	5.59614155468805e-23	1.10602665870105e-21	20.9562344050501	down-regulated
PCDH1	215.927297015205	-2.15078	0.217968045500815	-9.86742	5.76304461334153e-23	1.13507571865883e-21	20.9449751665776	down-regulated
FAM153A	105.390001451897	-6.94861	0.704363538256202	-9.86509	5.89813511536208e-23	1.16045758607894e-21	20.9353707280805	down-regulated
CASZ1	432.598044150368	-1.53639	0.156028535873448	-9.84684	7.07349019560146e-23	1.38123988498171e-21	20.8597308893601	down-regulated
FAM131B	226.781484198119	-2.31133	0.234812042525507	-9.8433	7.32674438215082e-23	1.42824508965315e-21	20.8451972603815	down-regulated
PAIP2B	332.34746244216	-1.58173	0.160785649521471	-9.83749	7.76239517135313e-23	1.50672454143778e-21	20.8219661379098	down-regulated
YBX2	180.164876088714	-2.73441	0.279028273495949	-9.79977	1.12845956471332e-22	2.17926581022772e-21	20.6616897945933	down-regulated
TMC8	326.417600450489	-1.77569	0.181455602304306	-9.78582	1.29543178742424e-22	2.49326854491754e-21	20.6032309419957	down-regulated
KIAA0513	770.50672184973	-1.26063	0.129016475627821	-9.7711	1.49822197360555e-22	2.8811377497488e-21	20.5404359772192	down-regulated
OLAH	79.726999029431	-4.7922	0.49207738320424	-9.73872	2.06131237580943e-22	3.93740037048996e-21	20.4047904221786	down-regulated
CCR4	291.658754101511	-11.6015	1.19139301048129	-9.73775	2.08103291617356e-22	3.97174020885788e-21	20.4010191664076	down-regulated
GBP1	309.921514108715	-1.79107	0.184044026043073	-9.73172	2.20822435527027e-22	4.20392787033408e-21	20.3763447440673	down-regulated
NTNG2	405.861228045997	-1.78233	0.183588485758853	-9.70831	2.77896870421129e-22	5.2474362493113e-21	20.2800528289229	down-regulated
PROC	228.660960093468	-1.98074	0.204063936316261	-9.70647	2.82969944061037e-22	5.32918932666356e-21	20.2733388505858	down-regulated
NKX3-1	848.328894187216	-1.10077	0.113669048815879	-9.68402	3.52589778902823e-22	6.59672896686169e-21	20.1806713589716	down-regulated
SEPTIN4	253.649383691964	-2.00582	0.208089361518409	-9.63921	5.46057126997798e-22	1.0157999844919e-20	19.9931917981377	down-regulated
PIPOX	107.152331862597	-3.62596	0.376535109290884	-9.62981	5.98413981424581e-22	1.10957345880418e-20	19.9548439402123	down-regulated
H2AC13	211.199006497976	-2.18702	0.227288979495674	-9.62221	6.44298772898883e-22	1.19271165205684e-20	19.9234645379364	down-regulated
SP6	376.529336176535	-1.64834	0.171863616093481	-9.59098	8.72564050521147e-22	1.6048417742757e-20	19.794567779425	down-regulated
CREB3L1	640.311360378174	-1.19095	0.124356944120744	-9.57687	1.00028145099187e-21	1.83234836858542e-20	19.7369919541555	down-regulated
HES4	1037.83484948714	-1.13685	0.118730771752387	-9.57504	1.01814140349512e-21	1.86356677131299e-20	19.7296550419264	down-regulated
PPP1R13L	1440.92884259703	-1.01855	0.106437289412099	-9.56948	1.07446402909571e-21	1.96192999158918e-20	19.7073164938006	down-regulated
HYDIN	78.3016483833664	-3.86839	0.406557520549566	-9.51499	1.81738627664759e-21	3.27129529796566e-20	19.4852802505896	down-regulated
MYO15A	93.2402290497043	-4.00898	0.422237143305767	-9.49463	2.20997398966148e-21	3.95918925128976e-20	19.4023937382512	down-regulated
CCL26	164.201058870753	-2.35039	0.247780305914675	-9.48579	2.40556237461918e-21	4.30282224433453e-20	19.3662465948654	down-regulated
SBSN	98.5972782993328	-3.32188	0.350235317011226	-9.48471	2.43062028122827e-21	4.34423333087293e-20	19.3620868566261	down-regulated
H2BC6	187.634919573181	-2.61961	0.276841026936356	-9.46249	3.00692677432937e-21	5.33659247144997e-20	19.2727359608011	down-regulated
CDH23	575.135164794006	-1.17988	0.124781780978799	-9.45557	3.21279727256366e-21	5.69752717876892e-20	19.2443135944387	down-regulated
TXNIP	371.733453279181	-1.52595	0.161397189256753	-9.45462	3.2418774819452e-21	5.7446270652074e-20	19.2407381599748	down-regulated
GATA2	864.965060239498	-1.15219	0.122081411411774	-9.43787	3.80433599533917e-21	6.72040377223171e-20	19.1726046330795	down-regulated
LEFTY1	82.1194334459792	-5.11002	0.54146564976493	-9.43738	3.82230302392722e-21	6.74691257236666e-20	19.1708949174695	down-regulated
UGT1A6	836.198897881792	-1.198	0.127155234312557	-9.42157	4.44411010216827e-21	7.79018315447774e-20	19.1084523315387	down-regulated
IQCD	264.543641327345	-1.76909	0.187871390892903	-9.41647	4.66497615621231e-21	8.16478315267022e-20	19.0880553451403	down-regulated
SLC8A2	112.34452531749	-3.22158	0.342283965125026	-9.41201	4.86727560339588e-21	8.49835091079824e-20	19.0706653401473	down-regulated
METRNL	286.915138855505	-1.74294	0.185352228406753	-9.40337	5.28405458113829e-21	9.19183479350987e-20	19.036597789902	down-regulated
H2BC17	140.22796700758	-2.56084	0.272562200214154	-9.39543	5.69833698507094e-21	9.88300168683177e-20	19.0051111305097	down-regulated
HBEGF	801.227641981035	-1.09222	0.116486049971705	-9.37637	6.82837507223339e-21	1.17704244437258e-19	18.9292078761333	down-regulated
CNTFR	220.571785302847	-11.1983	1.19440223939122	-9.37566	6.87432817596603e-21	1.18406795520721e-19	18.9266	down-regulated
EPHB3	316.659441820818	-1.59763	0.170420004672352	-9.37469	6.93818570039791e-21	1.19326321313711e-19	18.9232637479437	down-regulated
PMEL	275.758010677569	-1.87385	0.199905603872675	-9.3737	7.00358077538681e-21	1.20360180022258e-19	18.9195171713589	down-regulated
FBXO32	404.27859411629	-1.47112	0.157325669663024	-9.35077	8.70106512313549e-21	1.49194787077511e-19	18.8262463510123	down-regulated
JPH4	104.798632544615	-7.27257	0.777894822457245	-9.34904	8.84501254906555e-21	1.5143512093772e-19	18.8197733912785	down-regulated
TNNI3	287.197617734794	-1.8575	0.199231135144741	-9.32333	1.12740960264591e-20	1.91726940485783e-19	18.7173168580022	down-regulated
KCNH2	171.247735045586	-2.40676	0.258925660310288	-9.29516	1.46981814207619e-20	2.47189784661493e-19	18.6069694808195	down-regulated
ENSG00000288640	227.55151203335	-11.2423	1.21162719062737	-9.27868	1.7159347409289e-20	2.87731573776952e-19	18.5410124788649	down-regulated
CKM	203.909931053773	-11.0843	1.19839666732735	-9.24931	2.25939162132392e-20	3.7526979786246e-19	18.4256563866913	down-regulated
ENG	218.490072803695	-1.99046	0.2154464226532	-9.23876	2.49369283090007e-20	4.12981629582492e-19	18.3840692663785	down-regulated
ATCAY	199.586212253915	-11.054	1.19652562219641	-9.23842	2.50169354105204e-20	4.14005754636848e-19	18.3829936221891	down-regulated
ZNF530	604.357746509131	-1.1604	0.1257497040465	-9.22785	2.76105940233213e-20	4.55934939567715e-19	18.3410971253237	down-regulated
TMEM190	133.677033003399	-2.54366	0.276031563158834	-9.21511	3.10955946859076e-20	5.13111087402218e-19	18.2897886009252	down-regulated
MGAT3	139.180156853268	-3.27195	0.355319167937551	-9.20848	3.307686535832e-20	5.44227875657326e-19	18.2642192171794	down-regulated
ADGRF3	122.791756477736	-2.69928	0.293491065063151	-9.19716	3.67536334089051e-20	6.03851332460079e-19	18.219069971047	down-regulated
CALML6	114.977562748022	-3.34775	0.36421510192192	-9.19168	3.86762759033051e-20	6.34068327542817e-19	18.1978639397904	down-regulated
KLHDC8A	203.163621325986	-2.98452	0.324912171847208	-9.18562	4.09180031018112e-20	6.69375057203211e-19	18.1743304747103	down-regulated
B3GNT7	391.782927006134	-1.53753	0.167803454668597	-9.16267	5.06277416618887e-20	8.22899412975122e-19	18.0846532474847	down-regulated
MLF1	711.103342125813	-1.15	0.12559142590443	-9.15668	5.35206382602512e-20	8.67445451404413e-19	18.0617578259306	down-regulated
CCNG2	704.448961850063	-1.03071	0.112571218045826	-9.15606	5.38253228539834e-20	8.71763651170272e-19	18.0596012431702	down-regulated
ROM1	208.986425081339	-2.08367	0.227672812027104	-9.15202	5.5880314420706e-20	9.04403838791938e-19	18.0436376029359	down-regulated
FHAD1	148.715234061372	-2.7123	0.296486958862935	-9.14813	5.7928739195778e-20	9.36891489562377e-19	18.0283107060313	down-regulated
CFAP43	153.495067950858	-2.61912	0.286316740979811	-9.14762	5.8202842727662e-20	9.4065700714749e-19	18.026568705008	down-regulated
LIMS2	248.106816474729	-1.92127	0.210067842871663	-9.14596	5.91043572227375e-20	9.53874003110299e-19	18.0205089873166	down-regulated
FNDC1	74.4290703731198	-5.22292	0.573441800709237	-9.10802	8.39013712971398e-20	1.34360115890318e-18	17.871729630236	down-regulated
KBTBD13	181.947506086685	-10.9199	1.19893095702174	-9.10804	8.38814809492919e-20	1.34360115890318e-18	17.871729630236	down-regulated
CHST8	68.6722670058777	-5.67891	0.625177870367249	-9.08367	1.04972031281632e-19	1.67046274360742e-18	17.7771632060038	down-regulated
SPRED3	362.209327899752	-1.42302	0.156800239082682	-9.07535	1.13311491502026e-19	1.79689789029101e-18	17.7454766012122	down-regulated
OPRD1	81.1739592793494	-4.62092	0.509509966369088	-9.06934	1.19739296323285e-19	1.89750979458625e-18	17.7218159736808	down-regulated
CDK18	492.740375443399	-1.23755	0.136666631696164	-9.05524	1.36266387144702e-19	2.15641557656492e-18	17.6662675397669	down-regulated
FBXO2	890.091199791741	-1.10499	0.122384905266443	-9.02878	1.735918161105e-19	2.73002781609806e-18	17.5638329279349	down-regulated
EFNB2	293.791636976223	-1.63884	0.181569171339019	-9.02599	1.78078959448382e-19	2.79673558091642e-18	17.5533485923261	down-regulated
SPN	90.7709320871935	-7.05372	0.781498928664193	-9.02588	1.78249817403417e-19	2.79749093594288e-18	17.5532313119404	down-regulated
ZDHHC11B	483.625479337714	-1.22363	0.135743656199133	-9.01427	1.98185968171522e-19	3.10182818866254e-18	17.5083822615779	down-regulated
DDX58	853.940624736101	-1.02552	0.113814996705231	-9.01043	2.05251492812006e-19	3.21020660137268e-18	17.4934670165207	down-regulated
GNA15	67.2790838587268	-5.84545	0.6510479900846	-8.97852	2.74441580167934e-19	4.24840880372689e-18	17.371773699869	down-regulated
CLDN6	74.1564676357865	-3.96407	0.442340795066041	-8.96157	3.20093173828518e-19	4.93858039621142e-18	17.3063978718646	down-regulated
MICB	150.24755614744	-2.23032	0.249294698014963	-8.94654	3.66806173892929e-19	5.63639857766154e-18	17.2489983033628	down-regulated
CSDC2	117.765871099368	-3.14412	0.353210739877804	-8.90153	5.50824850899791e-19	8.37371361061004e-18	17.0770818964969	down-regulated
GOLGA7B	299.910603979068	-1.80635	0.203634780023651	-8.87053	7.27984631536598e-19	1.10154805999044e-17	16.957996550049	down-regulated
PDCL3P4	396.026282501724	-1.38862	0.156555863609349	-8.86979	7.32808973613308e-19	1.1073773800199e-17	16.9557043519031	down-regulated
SMPD4P1	150.431778198655	-10.6455	1.20249872181943	-8.85282	8.53365336064306e-19	1.28529340900419e-17	16.8909977195188	down-regulated
EFHD1	259.043292634677	-2.36565	0.267235099522033	-8.85233	8.57079587448725e-19	1.29003498274647e-17	16.8893985124854	down-regulated
PCP4L1	108.543879586694	-7.74197	0.876688904197671	-8.83092	1.03815680247583e-18	1.5564156062381e-17	16.8078744231593	down-regulated
ANKRD65	63.6729775806707	-5.55118	0.630324417052482	-8.80685	1.28706455996898e-18	1.9207352450932e-17	16.7165324943363	down-regulated
CA4	79.4145327866867	-4.62016	0.524703919102348	-8.80527	1.30542030526009e-18	1.94685326677139e-17	16.7106667797758	down-regulated
STAC2	123.029935923614	-2.60117	0.295670933015608	-8.79753	1.39859054378062e-18	2.08443958872942e-17	16.6810106870868	down-regulated
LRIF1	1681.99857616083	-1.02147	0.116198560223516	-8.79074	1.48571795322062e-18	2.20995696592633e-17	16.6556161831668	down-regulated
SYT3	150.474033661623	-2.25133	0.256369658087445	-8.78157	1.61210608495459e-18	2.39326862957298e-17	16.6210085517862	down-regulated
ENSG00000217801	414.05571316922	-1.3057	0.148782002116109	-8.77593	1.69498086875517e-18	2.51302693800864e-17	16.5998028560291	down-regulated
TBC1D10C	140.965323355463	-2.92221	0.333046055172212	-8.77418	1.72153815406079e-18	2.55074196714807e-17	16.593333472363	down-regulated
VSTM2L	801.957043975525	-1.24305	0.141743720652342	-8.76972	1.79111281409059e-18	2.64694415094009e-17	16.5772552219757	down-regulated
CP	1232.69427728316	-1.01316	0.11560849328448	-8.7637	1.88943991880964e-18	2.78683215985981e-17	16.5548891863788	down-regulated
SESN1	893.648726257078	-1.05768	0.120703855801398	-8.76256	1.90858734142283e-18	2.813252803127e-17	16.550791239726	down-regulated
KIRREL2	122.001436574706	-2.61639	0.298848997250108	-8.75488	2.0432888249431e-18	3.00596938300861e-17	16.5220154471883	down-regulated
ENSG00000233586	77.1140760735522	-3.83307	0.438075285641001	-8.74979	2.13743993372904e-18	3.13840085114803e-17	16.5032915870959	down-regulated
TNNC1	224.075397272174	-1.85341	0.212056685192097	-8.74018	2.32733050900234e-18	3.41062428547558e-17	16.4671661198573	down-regulated
IRGM	136.956258582851	-10.5108	1.20461005208316	-8.72551	2.64979939190161e-18	3.86826576186124e-17	16.4124836961855	down-regulated
GALNT16	248.920193902275	-1.80907	0.207455325520701	-8.72029	2.77493002458121e-18	4.04834221511886e-17	16.3927227827651	down-regulated
HMCN2	62.1530732051092	-4.16547	0.478105326444777	-8.71246	2.97361776801234e-18	4.32986965714193e-17	16.3635251770961	down-regulated
PIANP	124.864530534821	-2.97261	0.341372410633222	-8.70782	3.09782947180796e-18	4.50212614818622e-17	16.3465823403676	down-regulated
PHLDA2	917.098997384223	-1.16976	0.134798671379863	-8.67782	4.03411622447989e-18	5.83678987450461e-17	16.2338259410886	down-regulated
KLLN	128.496328089277	-2.35434	0.271312758272434	-8.6776	4.0422163032462e-18	5.8447985481202e-17	16.2332304530133	down-regulated
SPHK1	573.160117712309	-1.29294	0.149041255472577	-8.67505	4.13371246488523e-18	5.96952089035517e-17	16.2240605236486	down-regulated
TMEM59L	220.287876079613	-1.73941	0.200674858061192	-8.66779	4.40570096142916e-18	6.34220552805102e-17	16.1977596881601	down-regulated
CCM2L	103.915458006943	-7.72445	0.891302717343587	-8.66647	4.45730893909551e-18	6.40840101603207e-17	16.1932503193956	down-regulated
ENSG00000267706	129.716722722397	-10.432	1.20502144310595	-8.65707	4.84043334568904e-18	6.93734560261396e-17	16.1588066694086	down-regulated
GAST	127.867150010903	-10.4116	1.2050738660526	-8.63978	5.63218771901501e-18	8.04174772812745e-17	16.0946495549586	down-regulated
ITGAM	339.509526577618	-1.53394	0.177591073760059	-8.63746	5.74775355412495e-18	8.20161602951781e-17	16.0861005666951	down-regulated
COL9A3	201.951136423508	-2.2309	0.258609572904288	-8.62653	6.32420992326634e-18	9.00162996448428e-17	16.0456788438398	down-regulated
IGFL1	108.751947350924	-2.53234	0.293678622700692	-8.62282	6.53275065382411e-18	9.28685726134397e-17	16.032131229491	down-regulated
NOTUM	150.401344736865	-2.2056	0.25630162410982	-8.60547	7.60049547113097e-18	1.07644556119411e-16	15.9680079287488	down-regulated
CARMIL2	175.696802430441	-2.25982	0.262632919921083	-8.60447	7.6669842768314e-18	1.08384142494066e-16	15.9650342540624	down-regulated
PKP1	61.5312715756291	-5.02541	0.584966937387302	-8.59092	8.62728372427211e-18	1.21657513309847e-16	15.9148610647994	down-regulated
SMTNL2	76.6758670214411	-6.80245	0.792438246046939	-8.5842	9.14694941141247e-18	1.28667088387202e-16	15.8905325265976	down-regulated
FSCN2	206.021170823973	-1.91274	0.223008635893429	-8.57696	9.74111362498099e-18	1.36771717366646e-16	15.864003699849	down-regulated
CCNB3	294.858795444129	-1.73395	0.202520319966431	-8.56185	1.11070777723614e-17	1.556630309204e-16	15.8078145176416	down-regulated
CNIH2	193.702681397013	-2.08565	0.243965878645884	-8.54892	1.24242667215082e-17	1.7380244938596e-16	15.759944107362	down-regulated
FBXO36P1	96.8855107961731	-7.62443	0.892825413956703	-8.53967	1.34607684422151e-17	1.87725820845286e-16	15.7264759880106	down-regulated
GBP2	598.774816510659	-1.18287	0.138547602764174	-8.53764	1.36987364243139e-17	1.90811005890749e-16	15.7193965790042	down-regulated
TBX10	118.96534040391	-10.307	1.21109318413372	-8.51046	1.7323907278981e-17	2.38969248833789e-16	15.6216579815667	down-regulated
AMZ1	58.2641093157626	-4.41954	0.519352336769614	-8.50971	1.74361502350992e-17	2.40226717991197e-16	15.6193786920586	down-regulated
EOMES	229.95294144199	-2.18229	0.256677465371633	-8.50207	1.86233455471372e-17	2.5581000501999e-16	15.5920824737745	down-regulated
OSTCP2	177.527112462667	-2.34039	0.275734223722483	-8.48784	2.1052062492432e-17	2.87955822375475e-16	15.5406741357485	down-regulated
PTPRH	604.224548277545	-1.01499	0.119770414889848	-8.47448	2.36140014261838e-17	3.21263202686494e-16	15.493139015455	down-regulated
H2BC15	163.143612916305	-2.20313	0.260456471940164	-8.45871	2.70344294760321e-17	3.66049066488306e-16	15.4364606963628	down-regulated
H2BC4	212.934978025025	-2.22623	0.263618415079432	-8.44491	3.04277315624994e-17	4.10774376093742e-16	15.3863966553089	down-regulated
LCK	111.135051926357	-10.2092	1.2105300148049	-8.43364	3.35081260516969e-17	4.50491549537504e-16	15.3463133512413	down-regulated
OTOP2	76.5710571877216	-6.88483	0.816403987493058	-8.43312	3.3657965881114e-17	4.52239225529967e-16	15.3446317712865	down-regulated
LGALS7B	111.161856227778	-10.2095	1.21184033801767	-8.42478	3.61413278579202e-17	4.84463870133109e-16	15.3147386057895	down-regulated
MSX1	364.326843587999	-1.31249	0.156207598019942	-8.40222	4.38128874056817e-17	5.83523131619331e-16	15.2339419232767	down-regulated
IFI27	164.769848259239	-2.13571	0.254410990047835	-8.39473	4.66965388525482e-17	6.20478558234325e-16	15.2072732217421	down-regulated
DNAH6	84.5881850704492	-3.17925	0.378747513058156	-8.3941	4.69468212765687e-17	6.23440654574853e-16	15.2052048807858	down-regulated
SCUBE1	90.4498450973182	-7.47894	0.891508092014438	-8.38908	4.89945104694724e-17	6.49875963084014e-16	15.187169525955	down-regulated
HPX	150.063380324589	-2.0613	0.245744384096816	-8.38799	4.94539093698511e-17	6.55587950389859e-16	15.1833690372969	down-regulated
CFAP298-TCP10L	769.479868530931	-1.43561	0.171156465190079	-8.38769	4.95778202590342e-17	6.56848469803995e-16	15.1825348074846	down-regulated
RFPL4AL1	106.288200806651	-10.1452	1.21136974836814	-8.37496	5.52448751523876e-17	7.30232143255573e-16	15.1365390542522	down-regulated
GRM4	62.531158669102	-6.02566	0.720457291021904	-8.36366	6.08017245771344e-17	8.00895780152451e-16	15.0964239945893	down-regulated
APOC1	980.489661972636	-1.17002	0.140503177823082	-8.32733	8.26872138058589e-17	1.08478769614733e-15	14.9646552492934	down-regulated
GPR162	239.413804939946	-1.68011	0.201781092371008	-8.32641	8.33307177754881e-17	1.09197262603095e-15	14.9617882485477	down-regulated
SAMD14	171.868764074483	-2.27903	0.273775225403368	-8.32445	8.47179900377282e-17	1.10887625329107e-15	14.9551169168909	down-regulated
KIF1A	191.616915872355	-1.97753	0.23759106550781	-8.32324	8.55930591334328e-17	1.11904453903194e-15	14.9511526277962	down-regulated
HERC5	368.161482643996	-1.27176	0.152853510907421	-8.32011	8.78852872445074e-17	1.14769623250879e-15	14.9401730439958	down-regulated
CRIP3	144.854046355974	-2.14205	0.257917400044149	-8.30518	9.96648495987375e-17	1.2992921010618e-15	14.8862932017996	down-regulated
PPP1R1B	61.8058637851904	-5.61488	0.6776504214707	-8.28581	1.17309864125157e-16	1.51459330520345e-15	14.8197039671731	down-regulated
LRRC10B	62.3430623281139	-4.57635	0.552990841697767	-8.27563	1.27782730315744e-16	1.64421956998033e-15	14.7840401870007	down-regulated
ATG9B	85.7878144879781	-3.24284	0.392689580986536	-8.25802	1.48112872003832e-16	1.89937879978803e-15	14.7213884137505	down-regulated
CD4	77.3744872688703	-3.75006	0.454647156923122	-8.24829	1.6067683977387e-16	2.05818090206125e-15	14.6865164559515	down-regulated
IFI16	569.774598233346	-1.03424	0.125689798700785	-8.22853	1.89525661074213e-16	2.41955785129365e-15	14.6162639895102	down-regulated
ACYP2	483.894773093917	-1.14521	0.139326453423166	-8.21962	2.04143020448681e-16	2.60034161541898e-15	14.5849695935886	down-regulated
RTN4RL1	99.2946728753954	-3.17817	0.386805870483377	-8.21646	2.09599130784798e-16	2.6653710894665e-15	14.574242317261	down-regulated
ATP1B2	623.509035906527	-7.52588	0.916544970183914	-8.21114	2.19101707918436e-16	2.78155416158513e-15	14.5557124791894	down-regulated
SP110	569.669869925836	-1.17599	0.143245624577607	-8.20961	2.21900322707923e-16	2.81551478500454e-15	14.5504421877231	down-regulated
IL2RB	65.3841689158825	-3.61514	0.440428319748647	-8.20824	2.24456093354523e-16	2.84635807198824e-15	14.5457104665473	down-regulated
SCIN	234.305558626498	-6.09498	0.742793675075206	-8.20548	2.29675256842246e-16	2.91092311063466e-15	14.5359692659003	down-regulated
WFIKKN2	95.9048309783831	-9.99576	1.21847457716702	-8.20351	2.33474252185012e-16	2.95414284219436e-15	14.529568508998	down-regulated
FUT7	55.4841069298901	-5.0201	0.612293060830638	-8.19885	2.42695207915967e-16	3.06911120865097e-15	14.5129873747065	down-regulated
TESK2	142.880555294842	-2.62254	0.319995465438211	-8.19555	2.49449512567206e-16	3.15102854344871e-15	14.5015476627714	down-regulated
ETV7	97.6310233367023	-10.0229	1.2251255261467	-8.18114	2.81171110090827e-16	3.53800511140241e-15	14.4512415439949	down-regulated
ACVRL1	68.6873025192374	-4.48604	0.548420092089288	-8.17994	2.83993358471128e-16	3.57154561415014e-15	14.4471437988932	down-regulated
TXNDC16	305.073114900618	-1.36985	0.168008495809727	-8.15344	3.53711328814328e-16	4.42391534633419e-15	14.3541931920496	down-regulated
PLEKHH2	568.034857734857	-1.01242	0.124295519027006	-8.14527	3.78445592026809e-16	4.7229015066303e-15	14.3257911112882	down-regulated
PAPPA2	60.6382682279267	-5.04559	0.61950990188082	-8.14448	3.80907803637182e-16	4.75102738329727e-15	14.3232124664487	down-regulated
GLS2	59.6378895199032	-3.71677	0.457076711936926	-8.13161	4.23627348051711e-16	5.25796296699477e-15	14.2791824770517	down-regulated
UGT1A3	259.798485486702	-1.89653	0.233356864291691	-8.12715	4.39490232047934e-16	5.4400344421012e-15	14.2643983506755	down-regulated
DNALI1	55.2174494365839	-4.43088	0.546410678988398	-8.10906	5.10113529187314e-16	6.28689405252596e-15	14.2015638583696	down-regulated
ENSG00000278965	90.3139215005317	-9.91087	1.22301624603601	-8.10363	5.33422811284984e-16	6.559977886434e-15	14.1830976246207	down-regulated
FOS	407.320603944243	-1.29388	0.160606223865644	-8.05623	7.86836317615878e-16	9.61416944012366e-15	14.0170882281339	down-regulated
MYBPC3	77.1382197045339	-3.12903	0.38845366798856	-8.0551	7.94145051816739e-16	9.69827301221857e-15	14.0133055943975	down-regulated
OVGP1	322.822312123053	-1.50574	0.188428092525134	-7.99108	1.33759845706197e-15	1.60681041853075e-14	13.7940353609734	down-regulated
GJC2	66.2628783884996	-3.59353	0.450561283151306	-7.97568	1.51543427130841e-15	1.81660789976729e-14	13.7407388015547	down-regulated
DES	79.9658361320435	-9.73453	1.22088616780239	-7.97333	1.54452131850149e-15	1.84952978486662e-14	13.7329386704048	down-regulated
BCO2	443.387609323586	-1.1671	0.146473619145702	-7.96798	1.61295109779457e-15	1.93045848826379e-14	13.7143395328184	down-regulated
APOL3	67.5717514891391	-4.20026	0.527667170842719	-7.96005	1.71968111837929e-15	2.054960321218e-14	13.6871965594047	down-regulated
CCK	106.143252825223	-2.42676	0.305119681402331	-7.95348	1.8133967278165e-15	2.16354369808809e-14	13.6648343287311	down-regulated
COMP	80.6491634944317	-9.74576	1.22592118638574	-7.94974	1.86898431592841e-15	2.22869778081511e-14	13.6519488193722	down-regulated
SSX4B	84.1967822593789	-9.80779	1.23583640851959	-7.93616	2.08538910036651e-15	2.47896957846385e-14	13.605728802795	down-regulated
ACER2	272.105087428454	-1.44012	0.181688176292705	-7.92632	2.25740972645648e-15	2.6778684459391e-14	13.5722107621284	down-regulated
SRRM5	231.970713467248	-1.78042	0.224686614747733	-7.92401	2.29967962449344e-15	2.72659205426413e-14	13.5643798352286	down-regulated
ABCA1	608.134727828365	-1.11004	0.140104158721996	-7.92294	2.31956821357437e-15	2.74731395275118e-14	13.5610917081963	down-regulated
LAPTM5	77.8156987634388	-9.69529	1.22376618041719	-7.9225	2.32783583699717e-15	2.7556739248567e-14	13.5597721731989	down-regulated
ZNF815P	267.423404167481	-1.69145	0.213525775387148	-7.92154	2.34586375469477e-15	2.77557337705007e-14	13.5566472868597	down-regulated
SLC17A9	86.1046331816136	-2.6653	0.336991485237281	-7.9091	2.59264346730607e-15	3.06596571525535e-14	13.5134327058935	down-regulated
FES	168.052080280897	-1.80169	0.227887534343667	-7.90607	2.65649836806007e-15	3.13984879726933e-14	13.5030912653321	down-regulated
ATP2B3	60.0263403597036	-6.53457	0.827961088793985	-7.89237	2.96503882523871e-15	3.48824495351264e-14	13.4573930253956	down-regulated
IQANK1	282.137456412203	-1.52485	0.193311714544262	-7.88806	3.06924527484541e-15	3.60711507597614e-14	13.4428400023824	down-regulated
CCDC184	429.518376192168	-1.16524	0.147734681304502	-7.8874	3.08536063788531e-15	3.62418547505827e-14	13.4407895845236	down-regulated
MAPK8IP2	405.655376608375	-1.29849	0.164820871179825	-7.87817	3.32202501579241e-15	3.89415154628999e-14	13.4095871513171	down-regulated
CLCNKB	75.1315311142262	-3.98962	0.506768225455461	-7.87267	3.47142305491124e-15	4.06508934731692e-14	13.3909299045299	down-regulated
DDN	153.308254560698	-2.04098	0.259267680575301	-7.87211	3.48695684635484e-15	4.07909510342577e-14	13.3894361690611	down-regulated
SRL	74.7811510042122	-9.63809	1.22477754924643	-7.86926	3.56744862310225e-15	4.17111437779652e-14	13.3797479010281	down-regulated
NCF1	51.8794877684857	-4.90109	0.623376815877598	-7.86216	3.77563405826694e-15	4.40323177685706e-14	13.3562284535909	down-regulated
B4GALNT3	155.815522982004	-2.08424	0.265137337377832	-7.86097	3.81170512071492e-15	4.44302487421236e-14	13.3523212553608	down-regulated
NFATC4	65.688365991636	-3.19269	0.406960604010897	-7.84522	4.3220570393157e-15	5.01993046951713e-14	13.2993022981765	down-regulated
CAMK2B	127.530797143139	-2.15408	0.274937388120375	-7.83481	4.69535650605502e-15	5.43411803250289e-14	13.2648709326631	down-regulated
KCNJ4	75.9464696065306	-9.66063	1.2342642425611	-7.82704	4.99506015557473e-15	5.77218209052925e-14	13.2386599770129	down-regulated
MAFF	587.780523728531	-1.23027	0.157291344412798	-7.82161	5.21529647401777e-15	6.00840121587042e-14	13.2212410746689	down-regulated
ENSG00000216775	413.204057477769	-1.20169	0.154037036853671	-7.80131	6.12680377889012e-15	7.02301833568149e-14	13.1534761977271	down-regulated
THEMIS2	113.504584326238	-2.36625	0.303602161092505	-7.79391	6.49654525602223e-15	7.44310071866438e-14	13.1282461041756	down-regulated
FBXL16	289.781435317865	-1.48763	0.190949870931429	-7.7907	6.66369588487734e-15	7.61928258026015e-14	13.118085919225	down-regulated
DOCK8	176.914108433211	-1.85128	0.238081633570282	-7.77583	7.49549410688652e-15	8.55319577905509e-14	13.067871587039	down-regulated
CAMSAP3	877.907092966463	-1.02146	0.131576	-7.76325	8.278206476691e-15	9.42747472218064e-14	13.0256046233914	down-regulated
TP53INP1	672.65277889608	-1.267	0.163253674794355	-7.76094	8.43013704205599e-15	9.58612589393073e-14	13.0183568717473	down-regulated
CABP1	55.7776414331225	-6.1257	0.789403472414304	-7.75991	8.49875057347799e-15	9.65932808321279e-14	13.0150530826841	down-regulated
TFEC	66.8879424264299	-7.02689	0.906095185553881	-7.75514	8.82495199022632e-15	1.00150899379122e-13	12.9993451462842	down-regulated
APOD	65.1853974567798	-3.39412	0.437826079688132	-7.7522	9.03137637653532e-15	1.0244251113414e-13	12.9895197843784	down-regulated
KCNK3	657.41790242315	-1.06475	0.137546062374392	-7.74105	9.8598610133526e-15	1.11451643240218e-13	12.9529135239096	down-regulated
INAFM2	447.540663385297	-1.17333	0.151582889996435	-7.74051	9.90214459646806e-15	1.11874105634266e-13	12.9512704235836	down-regulated
ZSWIM3	283.123591247458	-1.42549	0.184287361045294	-7.73513	1.03293601758263e-14	1.1652745529046e-13	12.9335717375019	down-regulated
ENSG00000279602	126.323416882175	-2.39857	0.310109206647694	-7.73461	1.03717338503481e-14	1.16889748260006e-13	12.9322235766854	down-regulated
H3C14	113.824915198604	-2.43697	0.315332311840071	-7.72827	1.09018604261051e-14	1.225007866815e-13	12.9118611223171	down-regulated
CXCL11	69.6879648951282	-9.53687	1.23426393534212	-7.72677	1.10309662160575e-14	1.23890418004691e-13	12.9069622817483	down-regulated
SDCBP2	180.572	-2.23326	0.289579126577966	-7.71208	1.23782202825943e-14	1.38339815497675e-13	12.8590528078708	down-regulated
PTAFR	84.9838990592773	-2.9524	0.383265610271688	-7.70329	1.32611893209143e-14	1.4762871628969e-13	12.8308291566516	down-regulated
H3C15	110.182710055198	-2.35234	0.305959554453991	-7.68839	1.48998732908275e-14	1.65386416245191e-13	12.7815001634172	down-regulated
BGN	66.2329855849477	-9.46301	1.23098943450448	-7.68732	1.50251294993687e-14	1.66695545779754e-13	12.7780760046658	down-regulated
ZNF229	479.883778865206	-1.10699	0.144332539814318	-7.66972	1.72375256848348e-14	1.90591332026208e-13	12.7198968546882	down-regulated
COLQ	392.340909123243	-1.1774	0.153547108905411	-7.66799	1.7471275821474e-14	1.92917901038949e-13	12.7146274718806	down-regulated
FMN1	487.374728407074	-1.03341	0.134808984428897	-7.6657	1.77856036341415e-14	1.96080471995557e-13	12.7075656563418	down-regulated
SPOCD1	158.657059459847	-2.12989	0.277851164121188	-7.66557	1.7804053059248e-14	1.96188956051326e-13	12.7073	down-regulated
TKTL1	64.1626400557152	-9.41634	1.23163618232313	-7.64539	2.08306907421963e-14	2.28766159341287e-13	12.6406082189451	down-regulated
ATP2B2	68.5281392929536	-3.9412	0.515978690243204	-7.63831	2.20093132184587e-14	2.41244939693236e-13	12.6175417875649	down-regulated
SULT1A2	92.0795502177419	-3.08369	0.403752455442764	-7.63758	2.21344645025498e-14	2.42500085136589e-13	12.6152881045902	down-regulated
CACNG7	211.154727688944	-1.96422	0.25723608811952	-7.63588	2.24289922267826e-14	2.45608781770265e-13	12.6097561090041	down-regulated
SMPD3	150.711732042492	-2.05736	0.269673726498812	-7.62906	2.36472548809007e-14	2.58576604714955e-13	12.5874107714233	down-regulated
H2AC17	127.100990362041	-2.23752	0.293529207831701	-7.62281	2.48209830534888e-14	2.71150796655274e-13	12.5667891152467	down-regulated
GREB1	299.011980216476	-1.37678	0.180670341248735	-7.62037	2.52940230541508e-14	2.76053734366853e-13	12.5590063734869	down-regulated
ELOVL4	201.852876250695	-1.61937	0.212509723395276	-7.62022	2.5324625195459e-14	2.76255413573058e-13	12.5586892026756	down-regulated
SOCS1	95.1261835714038	-2.75179	0.361421928592847	-7.6138	2.66150381372193e-14	2.90054275021977e-13	12.5375207292146	down-regulated
PGPEP1L	63.0622395610493	-9.39134	1.23351889672735	-7.61345	2.66867688603906e-14	2.90558093067645e-13	12.5367670234237	down-regulated
CNN1	61.7103552686677	-4.49795	0.592355163419952	-7.59333	3.11780867151267e-14	3.3784414648802e-13	12.4712836012912	down-regulated
ENSG00000177359	65.6225728172428	-3.64887	0.480872882101037	-7.58802	3.24824506993982e-14	3.51643746573817e-13	12.4538971014203	down-regulated
VWCE	154.391825858751	-2.22937	0.294293766656908	-7.57532	3.58241011800124e-14	3.86900292744133e-13	12.4124009416742	down-regulated
FEZ1	97.4895236007074	-2.38372	0.314814431789225	-7.57183	3.67998034097547e-14	3.96873601562465e-13	12.4013477876563	down-regulated
GREP1	86.6965430256166	-3.0961	0.409049119269098	-7.56903	3.76022435080674e-14	4.04952705605784e-13	12.3925956950416	down-regulated
TTBK1	60.8321281878356	-9.34018	1.23441961967283	-7.56645	3.83554413828731e-14	4.12479376230728e-13	12.3845977610852	down-regulated
ENSG00000268643	46.9467695402489	-4.82993	0.638437683616705	-7.56523	3.87178019039523e-14	4.1598362554798e-13	12.380923764263	down-regulated
HCK	61.4680268315121	-9.35385	1.23910086622721	-7.5489	4.38947992636013e-14	4.69833107383254e-13	12.328056383371	down-regulated
GPR37L1	125.020700320242	-2.12876	0.282011689511156	-7.5485	4.40315176501898e-14	4.71075222634988e-13	12.3269097379521	down-regulated
ADRB2	103.247605245321	-2.5972	0.344457084758891	-7.53999	4.70022940452883e-14	5.01896335878027e-13	12.2993859748973	down-regulated
ERV3-1	410.879997057658	-1.87646	0.248869155310995	-7.53993	4.70224976785846e-14	5.01896335878027e-13	12.2993859748973	down-regulated
TH	53.9249	-6.38782	0.847210209611537	-7.53983	4.70597102661868e-14	5.02058369637577e-13	12.2992457885564	down-regulated
SSX4	71.3206225758869	-9.57047	1.27088396178314	-7.53056	5.05236649292213e-14	5.38509483819969e-13	12.2688066438341	down-regulated
TBX21	62.6987356266203	-9.38403	1.24776370682398	-7.52068	5.44935960736382e-14	5.80280405292554e-13	12.2363620942933	down-regulated
ENSG00000248710	86.2009731212248	-2.83774	0.37826823378285	-7.50193	6.2884841945301e-14	6.64665945384749e-13	12.1773965720313	down-regulated
HAL	170.255353503156	-2.72468	0.363377094163906	-7.49822	6.46879354837872e-14	6.83406895597841e-13	12.1653206434697	down-regulated
RPLP0P2	68.1241358798175	-3.7142	0.495503041297654	-7.49582	6.58866043408336e-14	6.95425632106955e-13	12.1577493060637	down-regulated
FOXJ1	346.465324685156	-6.46373	0.863248990606132	-7.48767	7.01045894553084e-14	7.38919234277321e-13	12.1314030284855	down-regulated
RAB37	246.774882293471	-1.41158	0.188836931642231	-7.47513	7.71250016715178e-14	8.09919141977211e-13	12.0915583366102	down-regulated
MAB21L4	57.7468011722197	-9.26541	1.23953922680979	-7.47489	7.72705441162586e-14	8.11073772142469e-13	12.090939642241	down-regulated
ANKRD20A19P	57.0476872732247	-9.24674	1.23795236881894	-7.46939	8.05694645251191e-14	8.44145727631454e-13	12.0735825732286	down-regulated
SLC52A3	436.139358497788	-1.25838	0.168480646190631	-7.46898	8.08185196248447e-14	8.46366004232979e-13	12.072441789154	down-regulated
MYCL	181.185777706721	-1.69515	0.226982921203798	-7.46819	8.13029216258907e-14	8.51047762062838e-13	12.0700460659809	down-regulated
CYP27A1	68.7274567327162	-3.44471	0.461757976181409	-7.45999	8.65286861675688e-14	9.04087895638037e-13	12.0437893452603	down-regulated
LRAT	101.081521322871	-2.38715	0.320413851144249	-7.45021	9.31930300021861e-14	9.70161154723535e-13	12.0131561185236	down-regulated
APLN	175.361315967502	-1.68194	0.225978661457136	-7.44293	9.84780365116137e-14	1.02284297904588e-12	11.9901910315547	down-regulated
MYADML2	64.5463350525733	-3.1343	0.421606274224788	-7.43419	1.05207946134794e-13	1.08778524342998e-12	11.9634568369902	down-regulated
KLHL38	55.4016371428503	-9.2052	1.23930140807602	-7.42773	1.1047726877084e-13	1.14123118800993e-12	11.9426263682842	down-regulated
CD74	50.8169834289122	-4.33756	0.584106305481144	-7.42597	1.11957047405927e-13	1.1556171195737e-12	11.9371860330434	down-regulated
ENSG00000287067	47.9054853310008	-4.1452	0.558210452610499	-7.42588	1.12032608081406e-13	1.15572615344458e-12	11.9371450587675	down-regulated
WHRN	479.56381674666	-1.109	0.149574055019815	-7.41439	1.22187047487114e-13	1.2576325375503e-12	11.9004462350644	down-regulated
CD79A	83.0562114168114	-2.55853	0.345713799511461	-7.40071	1.35461096368357e-13	1.38946981716853e-12	11.857150882769	down-regulated
HSPB7	55.4884278584769	-9.20639	1.24446452797736	-7.39788	1.38379784468446e-13	1.41853285131217e-12	11.8481606020758	down-regulated
OVOL1	57.5067866557442	-6.81108	0.922702719340445	-7.38166	1.56330330279172e-13	1.59465334216731e-12	11.7973337125734	down-regulated
IFIT3	360.113	-1.2955	0.175664578315022	-7.37485	1.64528214552842e-13	1.67452833998668e-12	11.7761074979923	down-regulated
SCN3A	66.5464509447187	-3.96469	0.538101255130551	-7.36793	1.73302765124299e-13	1.76147342178971e-12	11.7541239053395	down-regulated
RGS5	145.948654367488	-1.81842	0.247127327127859	-7.35821	1.863906085761e-13	1.88692545012535e-12	11.7242452578842	down-regulated
TSPAN18	150.444493438922	-1.82164	0.247748143025173	-7.35278	1.94132418959928e-13	1.96181355355159e-12	11.7073422693879	down-regulated
CATSPERD	53.6941508401606	-9.15869	1.24820737259845	-7.33747	2.17664083804633e-13	2.19377671019017e-12	11.6588075784328	down-regulated
SRGAP3	448.547951082581	-1.22987	0.167835212981805	-7.32786	2.33860659203787e-13	2.35493446837644e-12	11.6280211736385	down-regulated
RASGRF1	67.6211752342066	-2.98582	0.407481784865764	-7.32748	2.34518356053934e-13	2.35947209613998e-12	11.627185154394	down-regulated
ENSG00000284883	46.6548720580876	-4.51963	0.617153915715065	-7.32334	2.41866170323513e-13	2.43232404648377e-12	11.6139785666424	down-regulated
SLC2A5	43.9299301381452	-5.40515	0.738775885970521	-7.31635	2.5479826398816e-13	2.55786028183357e-12	11.5921231817049	down-regulated
RTN2	481.438171808614	-1.01236	0.138450580715408	-7.31205	2.6309861760108e-13	2.63769964711545e-12	11.5787746587619	down-regulated
ARHGAP30	124.473964024944	-2.81395	0.384994168334552	-7.30908	2.68977633772951e-13	2.69426915095297e-12	11.5695590214805	down-regulated
DRAXIN	51.4175453760219	-9.09678	1.24779363369881	-7.2903	3.0927574087254e-13	3.08301644050894e-12	11.5110241593464	down-regulated
MGAM2	44.2686987740572	-5.41582	0.743477219905699	-7.28445	3.22991817025769e-13	3.2099160603503e-12	11.493506324294	down-regulated
TMEM52	100.235451647452	-2.62785	0.361957598077655	-7.2601	3.86810700093954e-13	3.8224814543543e-12	11.4176546129898	down-regulated
SSC5D	140.478	-2.87587	0.396292981052683	-7.25693	3.95960119397269e-13	3.90950571959487e-12	11.4078781471622	down-regulated
MAP1LC3A	316.563117195823	-1.35772	0.187181725395594	-7.25349	4.06181831307359e-13	4.00695739040351e-12	11.3971852757882	down-regulated
CT45A1	91.7026419047242	-8.96778	1.23787996871729	-7.24447	4.34140892856836e-13	4.27906689724117e-12	11.3686509238747	down-regulated
ZNF280A	190.779623457524	-1.68699	0.232910671517148	-7.24309	4.38566979837658e-13	4.32082331886751e-12	11.3644334918951	down-regulated
SPTBN4	320.416142901435	-1.2422	0.171515880889544	-7.2425	4.40483999207715e-13	4.33783464734028e-12	11.3627270067516	down-regulated
ARG2	308.267672951594	-1.23886	0.171066891140939	-7.24198	4.42169905512385e-13	4.35255628804157e-12	11.3612556037999	down-regulated
MYBPC2	50.0902841721548	-9.05881	1.2520811471882	-7.235	4.65534167505827e-13	4.57858981835252e-12	11.339268261824	down-regulated
TMEM151A	257.627432868535	-1.59415	0.220590724341857	-7.22674	4.94735710573867e-13	4.85531325260865e-12	11.3137827452636	down-regulated
FOXN4	54.7522113337989	-3.64028	0.503913598033531	-7.22401	5.04752978265972e-13	4.95148982726e-12	11.3052641088627	down-regulated
C1GALT1C1L	190.747876037221	-1.83788	0.254472511962832	-7.22231	5.11108903232362e-13	5.01168230931973e-12	11.3000164667446	down-regulated
IL24	48.7180101594667	-9.01882	1.24899311852171	-7.22088	5.165359900452e-13	5.06054262302236e-12	11.2958029128935	down-regulated
SLC12A3	75.1035161103371	-7.83938	1.08567612453171	-7.22074	5.17066304873384e-13	5.06356121850222e-12	11.2955439350285	down-regulated
ECM1	498.419728795157	-1.0294	0.142747733667588	-7.21129	5.54223112440187e-13	5.4181193849365e-12	11.266151429785	down-regulated
GPR160	211.763473017071	-1.8359	0.254633362442602	-7.20998	5.59595090210474e-13	5.46829027260561e-12	11.2621484398897	down-regulated
GAL	258.853	-1.30999	0.18195398315216	-7.19958	6.03971509194605e-13	5.88175331261823e-12	11.2304931942484	down-regulated
KRT75	47.7837472592437	-8.99154	1.24985699676823	-7.19405	6.28965156438065e-13	6.11992228219924e-12	11.2132540929895	down-regulated
USH1G	48.3278175592792	-9.00843	1.25249363830153	-7.1924	6.36635758769975e-13	6.18399644963776e-12	11.2087307684272	down-regulated
SLC16A10	84.9865045088527	-2.96212	0.412014111173398	-7.18936	6.50961861730419e-13	6.30702334401054e-12	11.2001755615616	down-regulated
MATK	44.6449687262483	-4.47814	0.623420783299149	-7.18318	6.81092854245288e-13	6.59615128029818e-12	11.1807093925294	down-regulated
TENT5B	315.119312617317	-1.44762	0.201632132820863	-7.17952	6.99556799475251e-13	6.76921458447645e-12	11.1694617185254	down-regulated
AGAP2	246.35321413643	-1.76513	0.245939429608659	-7.17711	7.12018868378129e-13	6.88395671302537e-12	11.1621618692209	down-regulated
RPL13AP20	283.005027246527	-1.49842	0.20913820810829	-7.16473	7.79412998968048e-13	7.50370233227033e-12	11.1247244025097	down-regulated
LMO2	89.0875639730201	-2.42173	0.338129407637108	-7.16213	7.94321709770629e-13	7.6407780169916e-12	11.1168624174344	down-regulated
SCN4B	41.186678194948	-4.93003	0.689163756234464	-7.15363	8.45099791472739e-13	8.11210364283099e-12	11.0908665092901	down-regulated
IGFN1	147.408064859414	-1.74026	0.243735320160533	-7.13995	9.3365420577005e-13	8.91706288394296e-12	11.0497781706629	down-regulated
TSKS	52.302813338048	-6.65671	0.934558782624964	-7.12284	1.05727731206551e-12	1.00682137013577e-11	10.9970475749736	down-regulated
CARD9	441.233071960485	-1.07054	0.150381696150105	-7.11882	1.08853013882335e-12	1.0344213846333e-11	10.9853025098482	down-regulated
ABCA12	266.896345056187	-1.36643	0.192064242367192	-7.11445	1.12358099501045e-12	1.06550826942564e-11	10.9724431753707	down-regulated
CILP2	78.8029383402027	-2.58283	0.364921302001566	-7.07776	1.46501905245911e-12	1.37953942840654e-11	10.8602658825029	down-regulated
REC8	368.769696792378	-1.3103	0.185468072842806	-7.06482	1.608212679101e-12	1.50846773859001e-11	10.8214639735912	down-regulated
ENSG00000286190	92.308517291882	-2.41505	0.341876649387045	-7.0641	1.61659518087033e-12	1.51538342170601e-11	10.819477468242	down-regulated
NACAD	54.1741874763894	-3.21506	0.455679506975352	-7.05552	1.71954355624148e-12	1.60923854454336e-11	10.7933795737381	down-regulated
SPEG	245.710990182538	-1.34413	0.191141550461639	-7.03213	2.03399302710087e-12	1.89031945764986e-11	10.7234647953132	down-regulated
BTBD17	43.4249498402998	-5.96241	0.85105506835035	-7.0059	2.45405887764069e-12	2.26409286249701e-11	10.6451057643906	down-regulated
TRAC	42.5892339087056	-8.82596	1.26006234558355	-7.00438	2.48075878706107e-12	2.28779972640824e-11	10.6405819962788	down-regulated
NFAM1	41.938062038649	-8.80293	1.25822617944303	-6.9963	2.62804461302862e-12	2.41873508245946e-11	10.6164116961385	down-regulated
F3	468.282855437507	-1.00021	0.143414462866551	-6.97423	3.07549584703169e-12	2.82370666245601e-11	10.5491804214636	down-regulated
GRIN2C	185.464408325214	-1.60923	0.230822379216035	-6.97174	3.13048382877378e-12	2.87072295734796e-11	10.5420087176047	down-regulated
PRRG4	221.836497382618	-1.47151	0.211098828396407	-6.97071	3.153445344317e-12	2.89061594956942e-11	10.5390096053416	down-regulated
CCT6B	197.232741114805	-1.99033	0.285593658785219	-6.96908	3.19010427768004e-12	2.92186882153428e-11	10.534339285788	down-regulated
HAND1	41.9708228338738	-8.80401	1.26394502013843	-6.9655	3.27229266850817e-12	2.9935369462049e-11	10.5238153774268	down-regulated
SAMD15	235.658314934234	-1.37075	0.196876101174062	-6.9625	3.3429272558855e-12	3.05325155539554e-11	10.5152374129894	down-regulated
PCDH19	43.1516256634217	-4.87166	0.699713162327864	-6.96237	3.34605447668723e-12	3.05488339001396e-11	10.5150053628486	down-regulated
DNAH2	95.4233797452624	-2.56851	0.368983075970194	-6.96105	3.37757715781726e-12	3.08119408616252e-11	10.5112809443658	down-regulated
CBARP	329.758245339199	-1.20787	0.173645609024496	-6.95598	3.50128047022841e-12	3.1914871742226e-11	10.496	down-regulated
MMRN2	321.004472720507	-1.29941	0.187422586946902	-6.93302	4.11938894356829e-12	3.73845620255014e-11	10.4273077029141	down-regulated
PRSS33	43.2832103060212	-8.85039	1.27656769655185	-6.93296	4.12131688563708e-12	3.73871692634943e-11	10.4272774158242	down-regulated
MAT1A	41.8768591824652	-4.38336	0.632683010032341	-6.92821	4.2618546695896e-12	3.85852777952356e-11	10.4135783686937	down-regulated
ZNF547	159.832518766805	-1.61269	0.232867071226603	-6.92537	4.34824104313269e-12	3.9320522575757e-11	10.4053807189615	down-regulated
DPF1	397.344764507819	-1.21494	0.175794791532664	-6.91112	4.80847219728149e-12	4.32933482543068e-11	10.3635788250869	down-regulated
WNT6	60.0349746657629	-3.05297	0.442369920690414	-6.90141	5.14905057920341e-12	4.62501240042914e-11	10.3348870985075	down-regulated
SIGLEC1	45.8461705805267	-6.46176	0.937096862739106	-6.89551	5.36706397295588e-12	4.81386868768863e-11	10.3175057605483	down-regulated
ESRRB	124.677423609302	-1.83637	0.266728584239538	-6.88479	5.78725114412918e-12	5.18192059223637e-11	10.2855092464289	down-regulated
CNGB1	68.3197293148075	-2.69758	0.392067788033851	-6.88038	5.96914047330298e-12	5.33221376345074e-11	10.2730924484506	down-regulated
CHRNE	81.6348270313318	-2.63361	0.382981043083014	-6.8766	6.12991825378709e-12	5.46940396113156e-11	10.2620599991685	down-regulated
ABHD17AP4	41.0692384373037	-8.77396	1.27763509090599	-6.86735	6.54075754256231e-12	5.82229620624648e-11	10.2349057038326	down-regulated
GGN	112.464134516658	-2.02093	0.294308431934131	-6.86672	6.56940258768408e-12	5.84551136931451e-11	10.2331774904633	down-regulated
SLCO2A1	38.7501341278039	-8.68965	1.26588881689083	-6.86446	6.67418714784842e-12	5.93643156616588e-11	10.2264745342803	down-regulated
ATP6V1FNB	90.3411732964707	-2.55621	0.372427667584203	-6.86365	6.71248001121767e-12	5.96816209503037e-11	10.2241593899554	down-regulated
KCNQ2	48.2106031391328	-3.31762	0.483482756613934	-6.86193	6.79381420797943e-12	6.03812161355052e-11	10.2190981441182	down-regulated
COL1A2	41.8305578586182	-5.06875	0.738904381139167	-6.85982	6.89493035446205e-12	6.12321406537339e-11	10.2130205575191	down-regulated
LY75	52.1746153975017	-3.90006	0.56934778514941	-6.85005	7.3822330005277e-12	6.5305250627339e-11	10.1850518994783	down-regulated
JPH3	141.849630973996	-2.23729	0.327253205429575	-6.83659	8.11030902138838e-12	7.14962174001541e-11	10.1457169345024	down-regulated
BIK	130.336055693575	-1.8666	0.27303717469894	-6.83642	8.11986833991386e-12	7.1552807320169e-11	10.1453733223551	down-regulated
STAB1	38.6051342608786	-8.68418	1.27097269744006	-6.8327	8.33284328459772e-12	7.33161516484219e-11	10.1348003391506	down-regulated
AKAP3	88.4227908045585	-2.89418	0.424156844284592	-6.82338	8.89219786680311e-12	7.79366942264267e-11	10.1082580192473	down-regulated
CCNP	97.114169232305	-2.25412	0.330843025008337	-6.81327	9.54029286673564e-12	8.3424479603673e-11	10.0787064937647	down-regulated
NPPC	38.1753956784432	-8.66657	1.27242988492763	-6.81104	9.68973192487231e-12	8.46662619263766e-11	10.0722896142048	down-regulated
SPTBN5	156.208460971018	-1.72949	0.253927329303308	-6.81096	9.69487980880459e-12	8.46787738915443e-11	10.0722254389851	down-regulated
ABCG4	99.5476588803744	-2.2755	0.334201616357023	-6.80875	9.8446973537745e-12	8.59214719639269e-11	10.0658982914637	down-regulated
EPN3	152.923252548313	-2.02708	0.297920275101815	-6.80411	1.0167348709654e-11	8.85678678882243e-11	10.0527238100532	down-regulated
ENSG00000280649	85.7652010721943	-2.23349	0.328423351967281	-6.80066	1.0414450085375e-11	9.06510651434396e-11	10.0426270886098	down-regulated
PHF24	46.8045685413438	-4.15193	0.610564095990908	-6.80016	1.04504002196482e-11	9.09292555194134e-11	10.0412963646714	down-regulated
IFITM3P2	56.3446972544544	-7.37502	1.08525542992172	-6.79566	1.07820320033872e-11	9.35647164102008e-11	10.028887894395	down-regulated
MYOM2	157.029479319166	-1.69634	0.249708014518186	-6.79329	1.09604561922911e-11	9.50406680783601e-11	10.0220905195249	down-regulated
PRAP1	36.8013268207547	-8.61479	1.26996322683364	-6.78349	1.1730353143658e-11	1.01446408894754e-10	9.99376332196524	down-regulated
MAPK15	102.040892545995	-2.32352	0.342809153793498	-6.77788	1.21949662482539e-11	1.04986358468157e-10	9.9788671278528	down-regulated
UBA7	154.139812035924	-1.77179	0.261472838858583	-6.77618	1.23395303511266e-11	1.06190792160677e-10	9.97391313944265	down-regulated
DSC3	365.145499566224	-1.02365	0.151101838398252	-6.77457	1.24772527257211e-11	1.07335460594085e-10	9.96925677574012	down-regulated
INSM2	39.7112099043856	-5.39442	0.797304373303589	-6.76583	1.32549435073949e-11	1.13767854104149e-10	9.94398043352404	down-regulated
PNCK	40.8842143624374	-5.22453	0.773223626314823	-6.75681	1.41059521896025e-11	1.2075373346982e-10	9.9180994328309	down-regulated
MYL4	36.8771312955617	-8.61663	1.27557717870082	-6.75509	1.42750174327033e-11	1.2192619837198e-10	9.91390296717966	down-regulated
ZNF117	224.234002931437	-1.33588	0.197810032032133	-6.75336	1.44463677957894e-11	1.23297314355973e-10	9.90904638303998	down-regulated
GNGT2	35.9746945627766	-8.58207	1.27081983563262	-6.75318	1.44644222288398e-11	1.23405186728117e-10	9.90866658649352	down-regulated
TMEM176A	39.091498666183	-5.62306	0.83462207315717	-6.73725	1.61412130800598e-11	1.36992910118586e-10	9.86330190858119	down-regulated
CIBAR2	36.7406194679935	-8.61123	1.27869756749388	-6.73438	1.64634062378744e-11	1.39519561676713e-10	9.85536489681578	down-regulated
TMEM88B	39.2027852816321	-4.50112	0.669744941054916	-6.72065	1.80913062776422e-11	1.52917168937282e-10	9.81554375097669	down-regulated
PTPN7	35.3715724763221	-8.55804	1.27366329997392	-6.71923	1.82681584495968e-11	1.54126173546617e-10	9.8121236035811	down-regulated
EXOC3L4	316.692698811683	-1.18226	0.175965214970501	-6.71869	1.83361675318336e-11	1.546427038177e-10	9.81067056558296	down-regulated
SCRT1	36.1325753891871	-8.58836	1.27886378020547	-6.71562	1.87266518833364e-11	1.57644234620417e-10	9.80232190768375	down-regulated
ZSCAN18	122.186552828219	-1.85629	0.27643904036046	-6.715	1.88061021823319e-11	1.58196181812838e-10	9.80080400274496	down-regulated
NCAN	58.4907917178378	-3.40836	0.508684131520483	-6.70034	2.07936871029495e-11	1.7440064103865e-10	9.7584519230787	down-regulated
RAC2	40.8498206641665	-5.84413	0.873527494094884	-6.69027	2.22764171069412e-11	1.86288070837789e-10	9.72981495473981	down-regulated
GRIN1	142.171393535773	-1.97155	0.294779222440312	-6.68824	2.25870033947116e-11	1.88677651524446e-10	9.72427953806722	down-regulated
EXOC3L2	227.519328178147	-1.34501	0.201149335688623	-6.68664	2.28345779357386e-11	1.90675838035768e-10	9.71970433617559	down-regulated
SLC6A19	295.948893530316	-8.3308	1.24649097690061	-6.6834	2.33462675811778e-11	1.94877196205084e-10	9.71023897741247	down-regulated
DLX2	52.5161466937196	-3.25726	0.488210244888739	-6.67185	2.52604075408905e-11	2.09932227221667e-10	9.6779208866668	down-regulated
CT45A10	34.4316666451916	-8.51811	1.27845522195184	-6.66281	2.68636634330906e-11	2.22687945548661e-10	9.65230329137813	down-regulated
CD27	72.2890246288789	-2.42967	0.36524467844892	-6.65217	2.88800781727716e-11	2.3896848997862e-10	9.62165936068612	down-regulated
CAPN8	123.780303246435	-1.82207	0.274076518736457	-6.64803	2.97043751851727e-11	2.45432669223972e-10	9.6100676293866	down-regulated
SLC4A5	112.018153312082	-1.91777	0.28847466474409	-6.64798	2.97152138494628e-11	2.4543323421586e-10	9.61006662963145	down-regulated
FCMR	111.64128518292	-2.09574	0.315733652807486	-6.63768	3.18648655360867e-11	2.62712212675957e-10	9.58051973774117	down-regulated
OR2B6	105.066174982734	-2.19393	0.330575933857634	-6.63669	3.2079485160121e-11	2.64386006448042e-10	9.57776153512901	down-regulated
ALDH8A1	78.0670252308112	-2.29818	0.346302155763664	-6.63633	3.2158113475814e-11	2.64938210371239e-10	9.57685540162478	down-regulated
OTULINL	249.368207733076	-1.46723	0.221147509309219	-6.63461	3.25369873381335e-11	2.67769182904076e-10	9.57223940665497	down-regulated
MYL7	34.0700653104268	-8.50446	1.2825997262242	-6.63064	3.34237034528467e-11	2.74669799597357e-10	9.56118908935719	down-regulated
COL9A2	71.0934451556147	-3.4448	0.519709878800785	-6.62831	3.39549552935738e-11	2.78934939160043e-10	9.55449708295864	down-regulated
CHRNA4	96.6655383594651	-2.27079	0.342648515538575	-6.62718	3.42158880570892e-11	2.80875957148757e-10	9.55148543461299	down-regulated
PLA2G4D	34.3086647229976	-8.51331	1.28557975069423	-6.62216	3.53999145696401e-11	2.89760507619597e-10	9.53796080620659	down-regulated
TENT5C	97.8092662998302	-2.05189	0.309952704676854	-6.62002	3.59141556680696e-11	2.93337555327588e-10	9.53263233174354	down-regulated
NOS3	65.5890604952283	-3.65819	0.552957841982411	-6.61567	3.69870665981263e-11	3.01776324252811e-10	9.52031483563297	down-regulated
CD36	56.3099922325887	-3.82174	0.57785514302521	-6.61366	3.74932838857604e-11	3.05797048385364e-10	9.51456671080119	down-regulated
LCN15	33.9707071982114	-8.50005	1.28596943411565	-6.60984	3.84730565910851e-11	3.13675854596653e-10	9.50351891011647	down-regulated
C2orf16	286.182665063337	-1.12507	0.170234837976298	-6.60891	3.87157808312941e-11	3.15541921882522e-10	9.50094293362184	down-regulated
MRGPRE	32.6836524464756	-8.44387	1.28037907689424	-6.59482	4.25766484445615e-11	3.4601878200951e-10	9.46090032692484	down-regulated
PRR20G	33.3348321975308	-8.47227	1.28491681898092	-6.59363	4.29188166629105e-11	3.48550960126303e-10	9.45773371660849	down-regulated
RDH12	73.6897489252109	-2.43551	0.369531983303891	-6.59079	4.37493047543964e-11	3.55168919395506e-10	9.4495650460624	down-regulated
ANGPT4	39.8997743644756	-5.48474	0.832561179353446	-6.5878	4.46400896205628e-11	3.62013652054586e-10	9.44127505128955	down-regulated
RASIP1	119.340951189207	-1.91895	0.291303207506319	-6.58745	4.47447817702567e-11	3.62604582852279e-10	9.44056671128607	down-regulated
TRAPPC2B	267.321524997217	-1.46709	0.222730327444132	-6.58682	4.49331398407659e-11	3.63872207068718e-10	9.43905111500363	down-regulated
SLC5A2	127.506060282517	-2.54366	0.386372254955793	-6.58346	4.59635432676179e-11	3.71820100810251e-10	9.42966713571796	down-regulated
RASA4DP	91.9849178113218	-2.31565	0.351854648644065	-6.58128	4.664164995781e-11	3.77037928073279e-10	9.42361495980904	down-regulated
AVPR2	38.0692546155974	-5.41959	0.823539738562111	-6.58085	4.67778771382588e-11	3.78005058236398e-10	9.42250238865627	down-regulated
SOX8	113.227313098221	-2.15408	0.327860645147714	-6.57011	5.02764682084515e-11	4.05701188928539e-10	9.39179371957113	down-regulated
CDKN1C	112.488397736572	-2.44185	0.371800889403813	-6.56764	5.11189495465652e-11	4.12207580420074e-10	9.38488402588932	down-regulated
JPH2	184.798027752004	-1.72681	0.263002372093754	-6.56574	5.17751658244292e-11	4.17351425117472e-10	9.37949809918778	down-regulated
CALB1	40.8405358303616	-4.08494	0.622288237807542	-6.56439	5.22455456605037e-11	4.20845349774322e-10	9.37587746729647	down-regulated
SAXO2	148.268033049913	-1.6051	0.244638594128887	-6.5611	5.3410992431669e-11	4.29777434863303e-10	9.3667563905468	down-regulated
PLB1	108.552025085493	-2.40418	0.366458035557456	-6.56059	5.35943140566515e-11	4.31100327823147e-10	9.3654216468939	down-regulated
RNF32	257.452660143209	-1.32397	0.202175814425491	-6.5486	5.80805106075405e-11	4.66363169740885e-10	9.33127575458241	down-regulated
PDLIM3	32.4724941622133	-8.43514	1.28915232173945	-6.54317	6.02277180190028e-11	4.82671975900173e-10	9.31634791573533	down-regulated
SCGB1A1	52.641131163229	-8.16527	1.24919437069875	-6.53643	6.30065027455693e-11	5.0421031269703e-10	9.29738827587177	down-regulated
CSPG4	422.630598849398	-3.27116	0.502127740137561	-6.5146	7.28845703189464e-11	5.80529041743499e-10	9.23617604921833	down-regulated
ZNF350	309.00382900252	-1.18427	0.181844178458758	-6.51256	7.38803399348053e-11	5.87638808528567e-10	9.23088953049027	down-regulated
LGI4	53.5995867494085	-3.84119	0.589850374230639	-6.51214	7.40875069173675e-11	5.89080986613039e-10	9.2298249944806	down-regulated
TNNC2	42.5797682925692	-4.10307	0.63107735458725	-6.5017	7.94186645229829e-11	6.29931265976239e-10	9.20070683536506	down-regulated
TMEM86A	64.9086793191414	-2.56024	0.39416345742827	-6.49537	8.28303818033474e-11	6.55395396018987e-10	9.18349661374792	down-regulated
KALRN	186.975455870246	-1.37408	0.212055416734406	-6.47983	9.18232471134032e-11	7.24037423951637e-10	9.14023898546634	down-regulated
LMX1B	350.432419919232	-1.06333	0.164150853877914	-6.47776	9.30966924482394e-11	7.33571033025754e-10	9.13455782625495	down-regulated
FMO4	100.275550885983	-1.98772	0.306933983926107	-6.47604	9.41615584182398e-11	7.41705355421655e-10	9.1297685851898	down-regulated
CALML3	30.9996120265305	-8.36616	1.29205069000285	-6.4751	9.47481598325882e-11	7.46068094770221e-10	9.1272215320001	down-regulated
XKR7	30.4979328171924	-8.34319	1.28855696264872	-6.47483	9.49156550674999e-11	7.46971520824509e-10	9.12669595586136	down-regulated
CLCNKA	154.645712171153	-5.69433	0.879844331094205	-6.47198	9.67299729682682e-11	7.60622023464767e-10	9.11883110394317	down-regulated
ULBP3	413.390362061773	-1.03278	0.159589620829991	-6.47148	9.70444277003201e-11	7.62831465482889e-10	9.11757140135787	down-regulated
MLC1	35.8564054469311	-5.81157	0.8985523741549	-6.4677	9.95038433757041e-11	7.81355473068761e-10	9.1071513414495	down-regulated
SEZ6	38.607363539627	-6.20141	0.958867838145277	-6.46743	9.9685122781717e-11	7.82509327574843e-10	9.10651047692511	down-regulated
TEX14	450.994932746637	-6.54064	1.01256739955942	-6.45947	1.05073496760277e-10	8.22822970506252e-10	9.08469359273708	down-regulated
MYBPHL	30.2024977807633	-8.32905	1.28999986183513	-6.45663	1.07062820576086e-10	8.37250362144081e-10	9.07714465593842	down-regulated
ADGRV1	337.972759792168	-1.29861	0.20138694650313	-6.44835	1.13076682878517e-10	8.83067666016332e-10	9.05400601686233	down-regulated
C11orf96	35.194942843979	-4.69914	0.728929249089306	-6.44663	1.14364645379294e-10	8.92514225651835e-10	9.04938485300529	down-regulated
SRPK3	349.209495416216	-1.09071	0.169199110258793	-6.44629	1.14620035239463e-10	8.94201082860964e-10	9.04856480854509	down-regulated
C10orf105	50.5403169531696	-7.21591	1.12062655350336	-6.43917	1.20124929902633e-10	9.36185671211081e-10	9.0286380102515	down-regulated
ABCA13	35.9358283264557	-5.67459	0.881442132868839	-6.43784	1.21182194478995e-10	9.4410251206405e-10	9.02498084679662	down-regulated
LYPD3	121.838605341204	-1.92054	0.298727658437681	-6.42907	1.28388768631915e-10	9.9819967914844e-10	9.00078257406525	down-regulated
KRT5	65.8600861929524	-3.09657	0.48194797938158	-6.42512	1.31767126005619e-10	1.02376722380363e-09	8.98979877862351	down-regulated
SLC30A2	30.023586981499	-8.31999	1.29565864321217	-6.42144	1.34993735339888e-10	1.04812171752142e-09	8.97958828015914	down-regulated
SLC25A21	171.408824189328	-1.63472	0.255501247010256	-6.3981	1.57326161409e-10	1.21612909300824e-09	8.91502032193385	down-regulated
ROPN1L	89.5268875824943	-2.54227	0.397429289751059	-6.39679	1.58678491887558e-10	1.22616665755635e-09	8.91145049756792	down-regulated
CSF1R	37.0882014094881	-3.6121	0.565002289804116	-6.39308	1.62582450831183e-10	1.25463220099594e-09	8.9014835701899	down-regulated
SYCP2	279.824637461322	-1.45613	0.227883992923432	-6.38979	1.66118395612961e-10	1.28105109956959e-09	8.89243354643136	down-regulated
TRABD2A	415.045172976242	-1.08731	0.170499399395927	-6.37723	1.80317986625156e-10	1.38586383784623e-09	8.85827943738434	down-regulated
PHYHIP	294.951524749028	-1.24229	0.194900521682352	-6.37396	1.84209695828588e-10	1.4138668065146e-09	8.84959150137385	down-regulated
MIP	48.3276847918926	-4.26275	0.669101157170187	-6.37086	1.87971747975351e-10	1.4408006030482e-09	8.8413961184142	down-regulated
NTSR1	34.7826261126698	-4.46867	0.70141868066085	-6.37091	1.87915873940436e-10	1.4408006030482e-09	8.8413961184142	down-regulated
PGA4	28.7013397626504	-8.25626	1.2967594891533	-6.36684	1.9296076677965e-10	1.47655807702306e-09	8.83074946638627	down-regulated
TM4SF19	329.519840319057	-1.00998	0.15887812713016	-6.35692	2.05834282207851e-10	1.57032193604035e-09	8.80401130255068	down-regulated
ENSG00000255085	30.750431928703	-8.35677	1.31496598308502	-6.35512	2.08263512632998e-10	1.58832293369503e-09	8.7990611933048	down-regulated
P2RX2	41.5601109196881	-4.1863	0.658907645599719	-6.35339	2.10620447499523e-10	1.60468698014681e-09	8.7946096710803	down-regulated
CPHL1P	34.3991101005249	-5.75309	0.905704835244362	-6.35206	2.12457327273196e-10	1.61760025857053e-09	8.79112879233187	down-regulated
DNMT3L	28.4299874358535	-8.24295	1.29812243839552	-6.3499	2.15452210299649e-10	1.63876000277317e-09	8.78548464441799	down-regulated
H3C2	93.8956692754455	-1.97645	0.311376487846895	-6.34747	2.18891580369716e-10	1.66325486277596e-09	8.77904119815476	down-regulated
SEPTIN3	341.737185425074	-1.16655	0.183801531750698	-6.3468	2.19841726095268e-10	1.66991775141965e-09	8.77730491866334	down-regulated
TPSAB1	28.9672489058701	-8.27031	1.30374834764969	-6.34349	2.24621121088035e-10	1.70281640297876e-09	8.76883217498019	down-regulated
TRIM74	134.015699585437	-1.706	0.269198218996728	-6.33733	2.33784016553569e-10	1.77051185417838e-09	8.75190116114703	down-regulated
AKR1C4	670.611076814002	-1.2895	0.203628304039996	-6.33259	2.41074343612742e-10	1.82209026276854e-09	8.73943011273551	down-regulated
ZMYND10	122.976767588137	-1.75819	0.278026615528222	-6.32383	2.551629123097e-10	1.92283480347666e-09	8.71605802570447	down-regulated
PCSK5	244.325723981348	-1.22407	0.193603850349099	-6.32257	2.57248779048256e-10	1.93791245519063e-09	8.71266584600888	down-regulated
NLRP12	28.2794366306873	-8.23584	1.30280917175703	-6.3216	2.58870333626564e-10	1.94883949873873e-09	8.71022392675328	down-regulated
OTOGL	27.6545478708262	-8.20232	1.29763201948963	-6.32099	2.59886959996225e-10	1.95584677820145e-09	8.70866517101471	down-regulated
TMEM119	36.0929522335811	-6.22367	0.98507591581848	-6.31796	2.65041120113057e-10	1.99331915681067e-09	8.70042315943065	down-regulated
GPR87	41.6508901958197	-3.60854	0.571429780861014	-6.31492	2.70294039247438e-10	2.03148435566314e-09	8.69218651779995	down-regulated
CBLC	34.3040711547929	-5.58179	0.88634132180699	-6.29756	3.023623509585e-10	2.2642896002768e-09	8.64506802812034	down-regulated
SRARP	36.017014657994	-6.09598	0.968013968545721	-6.29741	3.02651857803842e-10	2.26571305375622e-09	8.64479509317574	down-regulated
KCND1	360.87750204458	-1.10958	0.176323203980199	-6.2929	3.11581372181445e-10	2.33026462398122e-09	8.63259475785416	down-regulated
SLC12A8	123.732943870094	-1.66602	0.264883033150885	-6.28963	3.18230329299526e-10	2.37765008002544e-09	8.6238520603549	down-regulated
PDE6B	35.8088	-6.104	0.970510638841181	-6.28947	3.18556510188071e-10	2.37930703184719e-09	8.62354951187899	down-regulated
APOBR	41.5006284284601	-3.87887	0.617600485888893	-6.28055	3.37386355677607e-10	2.51417929142619e-09	8.59960375509055	down-regulated
CBFA2T3	37.8901980876865	-3.66954	0.584510045647488	-6.27798	3.43001159944502e-10	2.55434981464553e-09	8.5927196269759	down-regulated
DNAI4	210.564002915399	-1.63789	0.260908434541881	-6.27766	3.43702703834725e-10	2.55873806435338e-09	8.59197417016141	down-regulated
FADS6	27.7783942482367	-8.21007	1.30891789893863	-6.27241	3.55493342167768e-10	2.64392372105715e-09	8.57775107868785	down-regulated
TAMALIN	75.8193642412464	-2.53091	0.403737009092686	-6.26872	3.64028356640604e-10	2.70563541784934e-09	8.56773072462072	down-regulated
NTN5	143.684199423996	-1.57495	0.251942756387787	-6.25122	4.07266009017475e-10	3.01715793676535e-09	8.52040195556236	down-regulated
TRIM73	243.010929206734	-1.22861	0.196585678745436	-6.24972	4.11177287992791e-10	3.04415465847295e-09	8.51653328698191	down-regulated
TNFRSF8	36.2750043845195	-5.06593	0.81121285858258	-6.24488	4.24123918223043e-10	3.13796618456712e-09	8.50335174077937	down-regulated
ADAMTS17	36.4750864812917	-3.6286	0.58226904114534	-6.23183	4.61031563528213e-10	3.39779665901711e-09	8.46880261502236	down-regulated
DACT3	334.446628205664	-6.1888	0.993179571574693	-6.2313	4.62576869644472e-10	3.4080833189325e-09	8.46748979638471	down-regulated
RAB44	45.3118315950564	-3.22297	0.517917159420165	-6.22294	4.87926559101499e-10	3.58788978018876e-09	8.4451609069298	down-regulated
ATL1	296.413877374636	-1.1692	0.187969281161822	-6.22015	4.96686607763754e-10	3.65112723152272e-09	8.43757303284445	down-regulated
C7orf57	26.9208704506074	-8.16389	1.31317174287953	-6.21693	5.06987869092372e-10	3.72204882760212e-09	8.42921793388686	down-regulated
CPNE6	27.3597496612847	-8.18619	1.31697779183039	-6.21589	5.10332433343323e-10	3.74539629340665e-09	8.42650222364297	down-regulated
LGR5	40.2076168690745	-4.13681	0.665801997420382	-6.21327	5.18933553837052e-10	3.80729485667699e-09	8.41938348786411	down-regulated
CHST2	117.461670635683	-1.74073	0.280165572795973	-6.21322	5.19109970437644e-10	3.80736337506696e-09	8.41937567210725	down-regulated
KIAA1210	26.9076838092245	-8.16439	1.31430457236446	-6.21195	5.23319846100181e-10	3.83700535808588e-09	8.41600759434208	down-regulated
CT45A5	27.5692129742117	-8.19926	1.32215901837268	-6.20142	5.595587172065e-10	4.09612079913322e-09	8.3876272440187	down-regulated
CRYBG2	219.029963926664	-1.20966	0.195078411998449	-6.2009	5.61424619623837e-10	4.10845993320103e-09	8.38632094402553	down-regulated
TBXA2R	139.886052781374	-1.52665	0.246320315313552	-6.19783	5.72452269293568e-10	4.18244383220963e-09	8.37856988264894	down-regulated
ST14	122.638644630259	-1.68521	0.272128080929406	-6.19272	5.91352129141128e-10	4.31223434203776e-09	8.36529764608466	down-regulated
HTR7	25.9827437024801	-8.11261	1.31170902638389	-6.18476	6.2196477848516e-10	4.52966870313833e-09	8.34393356082611	down-regulated
SEMA7A	77.5044262403497	-2.7529	0.445139283080996	-6.18437	6.23518925474586e-10	4.53953650917408e-09	8.34298848674285	down-regulated
PHEX	212.468125360101	-1.29657	0.209711061525241	-6.18265	6.30338328111335e-10	4.58771952123957e-09	8.33840314135957	down-regulated
ERFL	86.8360214693657	-2.44238	0.395601623036409	-6.17384	6.66501364183876e-10	4.84164267995606e-09	8.31500726525561	down-regulated
SLC6A12	51.1725524315314	-2.99011	0.484523799098093	-6.17123	6.77622401489931e-10	4.91616023086678e-09	8.30837397073122	down-regulated
DOK7	302.912182764216	-1.2274	0.199012625758446	-6.16743	6.94099613030794e-10	5.03089757689114e-09	8.2983545243049	down-regulated
TRIM55	37.3487063391748	-3.43574	0.557215067197148	-6.16591	7.00790224927578e-10	5.07777667588224e-09	8.29432640361291	down-regulated
SUSD5	196.708155301484	-1.37202	0.222569390866053	-6.16446	7.07240209123544e-10	5.12288298967175e-09	8.29048556360838	down-regulated
MAGEA11	25.7643710326359	-8.09997	1.31413491989702	-6.16373	7.10503342080592e-10	5.14488406715365e-09	8.28862440701675	down-regulated
ADGRF4	349.155926105015	-1.10825	0.179954434545247	-6.15848	7.34461489386606e-10	5.30824878532888e-09	8.27504873095388	down-regulated
FRG2B	30.3857145865614	-5.45246	0.885969655368524	-6.15423	7.54421514699017e-10	5.44387507186865e-09	8.26409184971055	down-regulated
PGA3	25.5001332177558	-8.08486	1.31487094775184	-6.14879	7.80786113400577e-10	5.62166001648416e-09	8.25013542294587	down-regulated
LRRC15	180.032457685537	-6.14512	1.00026477359366	-6.1435	8.0723929275331e-10	5.80661900355506e-09	8.23607666890071	down-regulated
H3C13	41.9392063351991	-3.54687	0.577877903668489	-6.13775	8.37007094323271e-10	6.01315184912948e-09	8.22089782884927	down-regulated
HSD17B6	147.545620397699	-1.49623	0.244081753887907	-6.13005	8.78510894334644e-10	6.3013869248026e-09	8.20056385253096	down-regulated
ALG1L13P	68.6135834560699	-2.36964	0.38682893670955	-6.12581	9.02241335409367e-10	6.46549545638637e-09	8.18939818915483	down-regulated
CBR3	380.519177808223	-1.3508	0.220584180759568	-6.12373	9.14092583580175e-10	6.54630477518071e-09	8.18400377918414	down-regulated
TAC3	36.8273524917163	-4.22009	0.689331049585882	-6.12201	9.23994135474224e-10	6.61513614803224e-09	8.17946121304403	down-regulated
CEL	171.690760175376	-1.43557	0.234515110769555	-6.12144	9.2730964630043e-10	6.63678775750446e-09	8.17804207074405	down-regulated
RHCE	34.1386344977804	-3.72754	0.60979812487313	-6.11275	9.79310108148421e-10	7.00016271784386e-09	8.15489186475141	down-regulated
DNAAF1	77.388177262824	-2.14879	0.351849213721543	-6.10714	1.01432725958269e-09	7.2368470855887e-09	8.14045060390934	down-regulated
AOC3	178.387344620572	-1.49509	0.24555512994528	-6.08862	1.13890415162991e-09	8.09776842662791e-09	8.09163464698915	down-regulated
RASL11A	201.941496851314	-1.46255	0.240246632760625	-6.08769	1.14550221356713e-09	8.14214112375785e-09	8.08926137447711	down-regulated
CFAP45	66.412369689102	-2.30789	0.379762136557591	-6.0772	1.2229834040506e-09	8.67663319162674e-09	8.06164876214479	down-regulated
NFASC	127.922919818106	-1.63987	0.269912168507942	-6.07555	1.23563070675794e-09	8.76363291179584e-09	8.0573158223163	down-regulated
AOC4P	31.5955142854068	-4.81696	0.793120456826229	-6.07343	1.25206393140725e-09	8.87742155224279e-09	8.05171315677105	down-regulated
ENSG00000241255	74.403415385508	-2.60257	0.428545267468445	-6.07304	1.2551340006418e-09	8.8964210284993e-09	8.05078467202695	down-regulated
AEBP1	24.0501678925938	-8.00035	1.31790157717733	-6.07052	1.27495013842443e-09	9.02845362163329e-09	8.04438662854609	down-regulated
ZACN	512.290906291751	-4.45662	0.73512470911893	-6.0624	1.3410287866626e-09	9.47871091515739e-09	8.02325072178649	down-regulated
CD177	31.2047067562645	-5.05296	0.833505405485405	-6.0623	1.3419125749932e-09	9.4820166694403e-09	8.02309928552417	down-regulated
ACSL5	338.514963926302	-1.1358	0.187368656069616	-6.06185	1.34563701021444e-09	9.50244071545294e-09	8.02216483122572	down-regulated
VN1R96P	24.5200130534953	-8.02839	1.32461077164548	-6.06095	1.35323777093127e-09	9.55019582656607e-09	8.01998772312567	down-regulated
NEFM	133.68287869833	-5.65577	0.933215221480846	-6.06052	1.35683998012921e-09	9.5696903333904e-09	8.01910211537631	down-regulated
CACNA1E	23.7597547221817	-7.9834	1.31813413962391	-6.05659	1.39034451032101e-09	9.79387038676818e-09	8.00904564778399	down-regulated
SYN1	37.7891901991808	-3.94026	0.650614795672454	-6.05621	1.39363352303191e-09	9.81400516775379e-09	8.0081537176689	down-regulated
KRT14	23.9554260908326	-7.99436	1.32044200275998	-6.05431	1.41024717472001e-09	9.92486492202579e-09	8.00327539529714	down-regulated
SH2D4B	38.6754122296947	-3.18743	0.526920754737648	-6.04916	1.45598491442224e-09	1.02341098796589e-08	7.98994992448787	down-regulated
HHAT	368.709502632929	-1.00502	0.166530486680347	-6.03504	1.5892110159476e-09	1.11567900897763e-08	7.95246073790903	down-regulated
UNC5A	56.1169776914969	-2.79555	0.463910388532801	-6.02605	1.68013207672882e-09	1.17697048154e-08	7.92923442914046	down-regulated
CYP1A2	23.8802505619146	-7.99224	1.32741272941011	-6.02092	1.73433819641959e-09	1.21307853959514e-08	7.91611108024755	down-regulated
PDGFRB	62.3178484965234	-2.43964	0.405574342908736	-6.01527	1.79592549887429e-09	1.25346248907649e-08	7.90188865814043	down-regulated
VENTX	24.1450095680201	-8.00832	1.33160696622763	-6.01402	1.80974282491541e-09	1.26156070645985e-08	7.89909184633849	down-regulated
ATP1A2	38.9371129458592	-3.22749	0.53721165472757	-6.00785	1.88000797262265e-09	1.30854067440822e-08	7.88321277329426	down-regulated
SLC9A3P2	23.489452658834	-7.96593	1.3263387164466	-6.00596	1.90208705543513e-09	1.3235041166185e-08	7.87827470353383	down-regulated
FAM71E2	31.2097427895933	-5.43412	0.90515184795517	-6.00355	1.93053983792943e-09	1.34207266097425e-08	7.87222397045174	down-regulated
GPR4	31.830298211109	-5.48565	0.913897027973754	-6.00248	1.94324651200308e-09	1.35049409928412e-08	7.86950730903591	down-regulated
FAM90A12P	24.4031910154312	-8.02194	1.33692584202619	-6.00029	1.96969207683135e-09	1.3676216650467e-08	7.8640340279868	down-regulated
ENSG00000257512	66.1103961103377	-2.40379	0.40105194104776	-5.9937	2.05115710819524e-09	1.42201911109076e-08	7.8470945669076	down-regulated
ENSG00000205236	861.941291898638	-1.00628	0.168021682604459	-5.98901	2.11127552045597e-09	1.46103087033558e-08	7.83534060769694	down-regulated
ENAM	22.9520676721564	-7.93426	1.3254191343789	-5.98622	2.14768095605800e-09	1.48532180961e-08	7.82817944197199	down-regulated
SOHLH1	23.2632130145231	-7.95368	1.32897748360106	-5.98481	2.16643649299733e-09	1.49783843453954e-08	7.82453502960859	down-regulated
NEB	146.852850152198	-1.57147	0.262617701247732	-5.98388	2.17889751088099e-09	1.50554022067787e-08	7.82230763776987	down-regulated
RNVU1-15	33.5295088353292	-3.71717	0.621480773054744	-5.98115	2.21563445319265e-09	1.52823024528754e-08	7.81581120942208	down-regulated
GFRA2	40.8324357215902	-3.81166	0.637959387913218	-5.97477	2.30414072484902e-09	1.58774595820561e-08	7.79921898413525	down-regulated
ENSG00000279187	68.0777932912389	-2.5694	0.430142432105473	-5.97337	2.32407457520404e-09	1.60099792683645e-08	7.79560923045676	down-regulated
CCDC144NL	24.1687768946597	-8.00712	1.34156787991193	-5.96848	2.39470290701223e-09	1.64716238590385e-08	7.78326358369267	down-regulated
CLDN9	90.8080332961534	-2.3494	0.393633458782047	-5.96851	2.39432620613218e-09	1.64716238590385e-08	7.78326358369267	down-regulated
NSG2	30.8382313301252	-5.29713	0.887801196305016	-5.96658	2.42281334908698e-09	1.66599488832209e-08	7.77832633544839	down-regulated
LINC00431	64.9088595073988	-2.36084	0.395809796962329	-5.96459	2.45250751805938e-09	1.68539630040824e-08	7.77329796372797	down-regulated
WDR38	36.238631892926	-4.57203	0.767266967366564	-5.95885	2.54021443527001e-09	1.74251675348986e-08	7.75882	down-regulated
DHDH	88.2401638727267	-1.89797	0.319066531238363	-5.94852	2.70583041741958e-09	1.85166557213686e-08	7.73243744815658	down-regulated
UNCX	23.5492253838084	-7.97199	1.34466543889917	-5.92861	3.05514213199923e-09	2.08257789123537e-08	7.68139874641524	down-regulated
PDE1B	29.7601603102053	-5.38736	0.911067679321545	-5.91324	3.35436723309289e-09	2.2817707614245e-08	7.64172798921194	down-regulated
KCNQ4	110.196615784498	-1.89444	0.320575836409334	-5.9095	3.43144981728656e-09	2.33072662999482e-08	7.63250866172052	down-regulated
KLK6	32.6775911435611	-4.72895	0.800727454313468	-5.90582	3.50903354285746e-09	2.37987667781654e-08	7.62344554694828	down-regulated
CT45A2	25.1238560785053	-8.06618	1.36684114996434	-5.90133	3.60580943272306e-09	2.44260360739873e-08	7.61214700584164	down-regulated
H3C12	60.4121700463353	-2.93933	0.498167329508857	-5.90029	3.62873030556203e-09	2.45739988716634e-08	7.60952416600319	down-regulated
MYH7	21.5964385931927	-7.84598	1.33000272082249	-5.89922	3.65227084100993e-09	2.47187252524307e-08	7.60697392962327	down-regulated
ENKUR	68.0036968734914	-2.63235	0.446851814136009	-5.89089	3.84129003537294e-09	2.59440774528982e-08	7.58596176779962	down-regulated
TRPV2	53.3828060105652	-2.64617	0.449826425332825	-5.88265	4.03759713191074e-09	2.72215276455568e-08	7.56508750626644	down-regulated
ASGR1	100.159556302171	-1.85965	0.316240461281316	-5.88049	4.09051222882453e-09	2.75131619452342e-08	7.56045949552613	down-regulated
SLC5A10	69.3373928175604	-2.16628	0.368647535557356	-5.87628	4.1959391270443e-09	2.81889919891172e-08	7.54992045379818	down-regulated
RASAL1	250.315473323855	-1.28099	0.218005029810214	-5.87596	4.20401584247137e-09	2.82349286820623e-08	7.54921330489986	down-regulated
CTSW	32.6023711612193	-3.54307	0.60313332584532	-5.87444	4.24284483476889e-09	2.84873152901336e-08	7.54534847773911	down-regulated
ENSG00000283559	23.0678552087686	-7.93972	1.35163466112355	-5.87416	4.24993346969341e-09	2.85254179242434e-08	7.54476798403987	down-regulated
CT45A3	36.9251912117764	-6.83334	1.16550548226808	-5.86299	4.54616924292608e-09	3.04055239776931e-08	7.51704750800004	down-regulated
LINGO1	296.815357888065	-1.02223	0.174354547618228	-5.86295	4.54721896243541e-09	3.04055239776931e-08	7.51704750800004	down-regulated
GPR50	22.004	-7.87398	1.34327818139485	-5.86177	4.57971994939256e-09	3.06138627769896e-08	7.51408186880546	down-regulated
YBX2P2	21.7183981329362	-7.85354	1.34094112692771	-5.85674	4.72051446756036e-09	3.15088118590409e-08	7.50156797298566	down-regulated
CFAP74	35.1888452838814	-4.03925	0.690106228848174	-5.85308	4.82545029817586e-09	3.21809661676416e-08	7.49240092123834	down-regulated
KRT74	21.2468737626966	-7.82258	1.33684112884908	-5.85154	4.87037450064154e-09	3.24520743042747e-08	7.48875753830556	down-regulated
PNMA6E	22.0925747452884	-7.87723	1.3468796519954	-5.84851	4.9600854196985e-09	3.30401714539869e-08	7.48095770767952	down-regulated
ADAMTS4	33.4813558753242	-3.4757	0.594543465199725	-5.84599	5.03550470745264e-09	3.35131662597637e-08	7.47478453891544	down-regulated
KIF5A	101.80715588841	-2.00731	0.343511481870981	-5.84349	5.1118499298275e-09	3.39914899915113e-08	7.46862979802627	down-regulated
ENSG00000280266	30.6698	-5.86884	1.00444075113207	-5.84289	5.13034420183338e-09	3.41045168236229e-08	7.46718809896441	down-regulated
YPEL3	468.588509477099	-1.04864	0.179534830833312	-5.84089	5.19216737245542e-09	3.44953673712869e-08	7.46223922551161	down-regulated
ADAMTS7P4	47.7151149248699	-3.56569	0.610808584020152	-5.83766	5.29396246749461e-09	3.5130697935139e-08	7.45431322207337	down-regulated
LRRC56	102.407211613305	-1.73274	0.296910465774946	-5.8359	5.34996922748286e-09	3.54713700191677e-08	7.45012203734497	down-regulated
MOBP	20.9180489851537	-7.79926	1.33691609607801	-5.83377	5.41884344087136e-09	3.58966873054002e-08	7.44494562806142	down-regulated
ZFR2	29.2322058716702	-5.35841	0.918617608013445	-5.83313	5.43974942393489e-09	3.60142387776375e-08	7.44352576034489	down-regulated
TMEFF2	116.072348766088	-1.97087	0.337920753706782	-5.83235	5.46517247101093e-09	3.61720448066794e-08	7.44162693986552	down-regulated
IRAG1	21.250753372598	-7.82124	1.34264749862827	-5.82524	5.70306772909789e-09	3.77246755909094e-08	7.4233744862027	down-regulated
DPEP3	20.7324292295356	-7.78738	1.33700995420335	-5.82447	5.72930963726403e-09	3.78872629175777e-08	7.42150676824649	down-regulated
ADRA2A	28.8392894745729	-5.19837	0.892924120528009	-5.82174	5.82391808346267e-09	3.84682450104195e-08	7.41489762652595	down-regulated
GOLGA6B	29.1483698765753	-3.88216	0.667211082689322	-5.81849	5.93808816641914e-09	3.91996387996406e-08	7.4067179347154	down-regulated
SLCO2B1	112.358108113106	-1.70859	0.293686123880773	-5.81776	5.96432282158873e-09	3.93614215054631e-08	7.40492922576837	down-regulated
NPAS4	20.8444527919087	-7.79374	1.34028968448486	-5.81496	6.06468260861047e-09	3.99890009505253e-08	7.3980594457563	down-regulated
IGFL3	20.7111758663557	-7.78518	1.33890567936447	-5.81458	6.07850916248898e-09	4.00685758735316e-08	7.39719609308659	down-regulated
WAS	64.9588212798374	-2.2345	0.384551693596466	-5.81067	6.22224503352035e-09	4.09646606627441e-08	7.38759063833682	down-regulated
CORIN	29.1169395262833	-5.35322	0.921457092741694	-5.80952	6.26536167032683e-09	4.12168192099907e-08	7.3849255266968	down-regulated
IGFL2	137.872937238758	-1.59312	0.27441878183036	-5.80542	6.4205286196895e-09	4.21767097680843e-08	7.37492730286347	down-regulated
ZBTB46	308.136910724514	-1.12583	0.194386493786574	-5.79173	6.96668017740432e-09	4.56328565342598e-08	7.34072234432757	down-regulated
PRRX2	175.201674281273	-1.63369	0.282329781506733	-5.78646	7.18867544032018e-09	4.69789320143436e-08	7.32809686038833	down-regulated
C2CD4C	171.453000530679	-1.36442	0.235805988287604	-5.78621	7.199213442565e-09	4.70208300169594e-08	7.32770970892857	down-regulated
GPR137C	55.4728490670264	-2.77368	0.479508738269014	-5.78441	7.27652804128682e-09	4.74849716508717e-08	7.32344381693935	down-regulated
FRMPD3	65.8425185276532	-2.40158	0.415245744935614	-5.78351	7.31588101907984e-09	4.77144523934721e-08	7.32135005609469	down-regulated
ARRDC4	210.365017937016	-1.22324	0.211521819346888	-5.78303	7.33684917417167e-09	4.78375161605219e-08	7.32023137805358	down-regulated
C19orf38	44.1785613130012	-3.88217	0.671588994486573	-5.78057	7.4448176703445e-09	4.85137275012326e-08	7.31413535553216	down-regulated
APOL4	21.0964464741913	-7.81072	1.3514155390413	-5.77966	7.485375677264e-09	4.87222910407004e-08	7.31227229831155	down-regulated
HTR7P1	297.794583387454	-1.18098	0.204348316380728	-5.77927	7.50275607871164e-09	4.88214750204685e-08	7.31138910358386	down-regulated
PRSS21	22.1812286555861	-7.8866	1.36470220411246	-5.77899	7.51509352565603e-09	4.88738445384274e-08	7.31092349694169	down-regulated
ERICH3	20.3694701293277	-7.76043	1.34443867677834	-5.77225	7.82219681905621e-09	5.07263008288711e-08	7.29476680707319	down-regulated
DCST2	170.603542717411	-1.4243	0.246776426529753	-5.77163	7.850884137949e-09	5.08978514183732e-08	7.29330055041057	down-regulated
SECTM1	51.5258367203413	-2.79996	0.48594503992047	-5.76189	8.3175083503058e-09	5.37243141402405e-08	7.26982912012708	down-regulated
PRRT4	69.4440751780084	-2.38907	0.414659457097157	-5.76153	8.33556375128134e-09	5.38256805792573e-08	7.26901047019101	down-regulated
CXCL14	20.1102541804646	-7.74246	1.34573938187254	-5.75331	8.75105489603903e-09	5.63967870392923e-08	7.24874563734383	down-regulated
CMYA5	89.9549920568314	-2.52151	0.438353064471882	-5.75223	8.80722558531567e-09	5.67427358321101e-08	7.24608972867155	down-regulated
H3-2	41.1279962108743	-3.43388	0.597220650876022	-5.74976	8.93701990646185e-09	5.75626935071941e-08	7.23985889249877	down-regulated
TEX13B	20.5691209815452	-7.77435	1.35224593975909	-5.74921	8.96600396975442e-09	5.77330597521231e-08	7.23857542503645	down-regulated
[truncated: 2,189 more rows]
